# Supplementary material for: Putative fossil blood cells reinterpreted as diagenetic structures
Source: PeerJ. 2021 Dec 16;9:e12651. doi: 10.7717/peerj.12651 (PMC8684720; doi:10.7717/peerj.12651)
Supplement: Supplemental Information 1 [file peerj-09-12651-s001.xlsx]

## Sheet: GastXsecInSitu
Gastralia Cross Section with Matrix and Concretion					20181211_Rib_CrossSection_5minCs2kV_Bi3_neg_LargeScan_4_3
Peak Identity	+/-(mu)	Mass	Dev. (ppm)	Counts/Shot	MinMass(m/z)	MaxMass(m/z)	Shift Direction	Deviation	Explained	AltIdentity1	Deviation	Explained	m/z	AltIdentity2	Deviation	Explained	m/z	AltIdentity3	Deviation	Explained	m/z	Notes
Calibration Peaks
C-	10	12.0005	247.3	0.13	11.99	12.021	+															Deleted OH- from calibration as it was 1.23 counts/shot, identified as unreliable by ionTOF
^18O-	10	17.9997	82.9	0.02	17.982	18.029	+
F-	10	18.999	189.4	0.61	18.981	19.027	narrow
Na-	10	22.9903	-109.3	0	22.967	23.011	narrow
C2-	10	24.0005	111.3	0.13	23.982	24.041	+
Al-	10	26.9821	-390.4	0	26.952	26.988	+
Si-	5	27.9775	-195.3	0.07	27.946	28.01	narrow
P-	5	30.9743	-65.9	0.02	30.941	31.006	+
Cl-	5	34.9694	89.1	0.6	34.935	35.021	narrow
^37Cl-	5	36.9665	34.7	0.21	36.929	37	+															shoulder on + side, ionTOF does not recognize
PO-	10	46.9692	-31.3	0.03	46.928	47.031	+
PO2-	10	62.9641	86.3	0.36	62.922	63.046	widen
PO3-	10	78.9591	18.5	0.43	78.899	79.088	+
Assigned Peaks
^10B-		10.0135	85.1		10.006	10.027	narrow	85.1	78.8	BeH-	-620.9	100	10.0206	^30Si--	2250	0.3	9.9918
B-		11.0099	-10.4		11.001	11.027	narrow	-10.4	100	^10BH-	-1051	100	11.0213	BeH2-	-1693.1	100	11.0284
CH-		13.0084	311.7		12.991	13.066	widen	311.7	100	^13C-	655.3	12.9	13.0039	BH2-	-1004.8	100	13.0255
O-		15.9955	455.4		15.985	16.023	narrow	455.4	100	NH2-	-1032.4	100	16.0193	^13CH3-	-1539	0.1	16.0274	CH4-	-1818.3	100	16.0318	under dev threshold but substantiated by presence in EDS
OH-		17.0033	348		16.988	17.03	narrow	348	100	NH3-	-1051.8	100	17.0271	^13CH4-	-1528.3	100	17.0352
C2H-		25.0084	162.3		24.988	25.045	narrow	162.3	100	BN-	-19.8	100	25.0129	^LiF-	-65.6	43.1	25.0141	BeO-	-191.4	100	25.0076	presence of C2H- seemed better supported due to alignment with calibration peaks not assigned peaks
CN-		26.0036	189.5		25.984	26.049	+	189.5	100	^10BO-	5.8	1.6	26.0084	C^13CH-	-122.1	29.6	26.0117	LiF-	-246.2	100	26.015
CHN-		27.0114	137.5		26.988	27.067	none	137.5	100	^10BOH-	-39.3	17.8	27.0162	C^13CH2-	-162.5	58.2	27.0196	BeH2O-	-301.1	100	27.0233	shouldered peak, could not distinguish species
SiH-		28.9853	-139.2		28.946	29.032	narrow	-139.2	100	^29Si-	145.7	17.6	28.977	AlH2-	-568.3	100	28.9977	^13CO-	-605.6	7.3	28.9988
SiH2-		29.9931	-96.1		29.942	30.052	+	-96.1	100	^29SiH-	179.3	14.2	29.9849	NO-	-276.5	100	29.9985	AlH3-	-510.8	100	30.0056	shouldered peak, could not distinguish species
CH3O-		31.0189	33.2		31.005	31.047	-	33.2	100	LiC2-	110.1	100	31.0166	^13CH2O-	177.3	1	31.0145	H4Al-	212.3	100	31.0134
O2-		31.9904	-151.1		31.941	32.027	narrow	-151.1	100	PH-	106.6	100	31.9821	^30SiH2-	-138.3	0.7	31.99	S-	404.1	47.9	31.9726	slight shoulder, could represent PH- & O2-
PH2-		32.99	-2.6		32.948	33.041	+	-2.6	100	^30SiH3-	-240	2.1	32.9978	O2H-	-252.4	100	32.9982	HS-	285.9	100	32.9804
^34S-		33.9684	107.1		33.934	34.04	narrow	107.1	100	H2S-	-477.3	100	33.9883	PH3-	-757.4	100	33.9978	^SiH4-	-988	100	34.0056	slight shoulder, could represent ^34S- & H2S-
C3-		36.0005	47.6		35.974	36.045	narrow	47.6	100	OHF-	15.8	100	36.0017	CHNa-	114.4	100	35.9981	^LiNO-	-316.6	37.9	36.0137
C2O-		39.9955	11		39.946	40.059	narrow	11	100	NaOH-	71.2	100	39.9931	LiHS-	-13.6	100	39.9964	^25MgNH-	-34.5	3.3	39.9973
C2HO-		41.0033	-19.8		40.946	41.073	+	-19.8	100	LiH2S-	-4.2	100	41.0043	CH2Al-	155.2	100	40.9977	BeO2-	37.6	100	41.0026
CNO-		41.9985	107.2		41.963	42.078	+	107.2	100	CH3Al-	-60.1	100	42.0056	MgH20-	163.9	42	41.9962	^10BO2-	-6.6	10.7	42.0033
AlO-		42.977	65.5		42.933	43.068	+	65.5	100	MgF-	-97.1	100	42.984	CP-	128.2	100	42.9743	BS-	-49	100	42.9819	shouldered, small peak slightly heavier
CO2-		43.9904	-4.2		43.93	44.071	+	-4.2	100	AlOH-	121.9	100	43.9848	BHS-	10	100	43.9897	CHP-	183.1	100	43.9821	possible lighter shoulder, very faint
CHO2-		44.9982	-2.1		44.946	45.063	+	-2.1	100	CNF-	-87	100	45.002	AlH2O-	121.3	100	44.9927	CH2P-	181.1	100	44.99
NO2-		45.9935	3		45.951	46.055	+	3	100	CH2S-	115.7	100	45.9883	PNH-	182.2	100	45.9852	SiH2O-	120.7	100	45.988
SO-		47.9675	-51.1		47.923	47.982	narrow	-51.1	100	Mg2-	-115.7	19.2	47.9706	^34SN-	-133.5	1.6	47.9715	^46TiH2-	-78	0.6	47.9688
CHOF-		48.0017	-6.5		47.982	48.056	-	-6.5	100	CH4S-	-52.9	100	48.0039	PNH3-	10.9	100	48.0009	C4-	17.4	100	48.0005
CH2OF-		49.0095	36.9		48.94	49.2	widen	36.9	100	SiH5O-	-3.8	100	49.0115	CNOLi-	-65.6	100	49.0145	C4H-	60.3	100	49.0084
^34SO-		49.9633	-184.3		49.93	49.97	+	-184.3	87.4	^49TiH-	-42.5	4.5	49.9562	^50Ti	175.8	70.3	49.9453	^50Cr-	150.6	1.6	49.9466
H_4FAl-		50.0118	-40		49.97	50.42	+	-40	100	C3^13CH-	-38.7	9.3	50.0117	C4H2-	-128.1	100	50.0162	CH3OF-	-151	100	50.0173
ClO-		50.9643	-7.1		50.92	90.99	none	-7.1	100	CK-	-5.9	100	50.9643	^49TiH2	-2.3	4	50.9641	SF-	-138.7	100	50.971
^37ClO-		52.9614	-103.4		52.91	52.97	none	-103.4	100	VH2-	-80.7	100	52.9602	C^41K-	-122.5	22.6	52.9624	CrH-	132.3	100	52.9486
H3SF-		53.9945	20.3		53.93	54.13	widen	20.3	100	NaNOH-	-10	100	53.9961	C2NO-	-54.5	100	53.9985	CHNAl-	48.3	100	53.993	messy, looks like 3-4 similar mass peaks stacked up, cut off clearest shoulder but program couldn't pick it up separately
SiAl-		54.959	146.9		54.89	54.98	none	146.9	100	NaS-	85.5	100	54.9624	CrH3-	46.5	100	54.9645	^41KN-	29.9	18.3	54.9654
CaO-		55.9581	11		55.86	56.06	none	11	100	MgS-	18	100	55.9577	C^44Ca-	47.1	1	55.956	^54FeH2-	51	9.9	55.9558	small - shoulder, could be MgS-
CaOH-		56.9659	56.4		56.87	57	none	56.4	100	MgHS-	63.4	100	56.9655	^29SiCO-	-50.2	10.5	56.972	CH^44Ca-	92	1.1	56.9639
SiHNO-		58.9833	0.2		58.92	59.09	none	0.2	100	CHSN-	-3.7	100	58.9835	MgH3S-	36.7	100	58.9811	MgOF-	74.5	100	58.9789
CaHF-		59.9694	55.8		59.9	60.12	widen	55.8	100	CHPO-	-72.2	100	59.977	C2HCl-	-75.2	23.3	59.9772	CSO-	86.4	100	59.9675
PNO-		60.9723	19.6		60.92	61.08	widen	19.6	100	CNCl-	16.7	100	60.9725	SiHO2-	-26.8	100	60.9751	CHSO-	-30.6	100	60.9754	many fits
Mg2O-		63.9655	20.1		63.89	64.14	widen	20.1	100	^34SNO-	6.7	4.3	63.9664	SO2-	68.5	100	63.9624	^46TiH2O-	48.3	5.4	63.9637
C3H3Al-		66.0056	4.7		65.91	66.11	none	4.7	100	C2H5^37Cl-	4.5	65.2	66.0056	CH2SN^6Li-	-9	2.5	66.0065	CHSNLi-	96.2	100	65.9995
C3H4Al-		67.0134	0.3		66.9	67.12	none	0.3	100	C^13CN3-	4.3	10.8	67.0131	CH3SN^6Li-	-13.1	100	67.0143	C3^13CH2O-	-15.8	14.5	67.0145
C4HF-		68.0068	1.5		67.89	68.17	+	1.5	100	CH2OF2-	-15.3	100	68.0079	BF3-	26.7	100	68.0051	SiC3H4-	-27.9	100	68.0088
SiC2H3N-		69.004	-26		68.95	69.1	narrow	-26	100	CH2SNBe-	-18.8	100	69.0035	C^13CN2O-	-39.7	0.5	69.005	CH2NO^25Mg-	31.9	2.3	69	- shoulder program doesn't pick up
Cl2-		69.9383	-38.3		69.87	69.97	-	-38.3	100	CNi-	-4.6	100	69.5359	^FeO-	7.1	95.1	69.9351	FeN-	-42.8	100	69.9386
C4H6O-		70.0424	62.3		69.97	70.12	-	62.3	100	C3H6N2-	-98	100	70.0536	C2^13CH5N2-	-34.2	50.3	70.0492	C2H4N3-	81.5	100	70.0411
C3H3O2-		71.0139	23.1		70.96	71.14	none	23.1	100	SiC2H5N-	-58.9	100	71.0197	^30SiC3H5-	28.8	5.1	71.0134	CH3SN^10B-	47.7	30.5	71.0121
FeO-		71.9304	23.2		71.85	71.98	none	23.2	100	C^60Ni-	10.2	2.6	71.9313	^17GaH-	-14	4.4	71.9331	CaS-	-43.6	100	71.9352
C2H2NO2-		72.0091	-3.7		71.98	72.12	none	-3.7	100	CH3SNB-	5	100	72.0085	^30SiC2H4N-	2	0.4	72.0087	LiSNOH3-	-17.4	100	72.0101
FeOH-		72.9382	29.5		72.87	72.97	+	29.5	100	CH^60Ni-	16.7	8.1	72.9392	^71GaH2-	-7.2	12.8	72.9409	CoN-	48.8	100	72.9368
C2H3NO2-		73.0169	-10.8		72.97	73.15	none	-10.8	100	^30SiC2H5N-	-5.2	1.3	73.0165	^29SiCH4N2-	22.5	2.8	73.0145	SiCH5N2-	-90.6	100	73.0227
H2Al2F-		74.9777	1.7		74.87	75.11	none	1.7	100	SiHNO2-	-5.3	100	74.9782	MgH3SO-	23.4	100	74.9761	^30SiH3N-	0.2	10.9	74.9778
CSO2-		75.9624	29.5		75.9	76.06	none	29.5	100	CH2O^46Ti-	12.5	6.6	75.9637	ScNOH-	31.9	100	75.9623	SiO3-	32.6	100	75.9622
CNOCl-		76.9674	15.6		76.9	77.07	none	15.6	100	^SiH2SN-	9.8	12.8	76.9678	AlH2SO-	50.3	100	76.9647	CH2PS-	85.2	100	76.962
CH2S2-		77.9603	11		77.9	78.08	+	11	100	SiH2SO-	13.9	100	77.9601	CaF2-	16	100	77.9599	^44CaH2O2	-4	1.2	77.9615
PSOH-		79.9491	-14.2		79.87	80.03	narrow	-14.2	100	ZnNH2-	-5.4	30.9	79.9484	CHOV-	9.2	100	79.9473	CHSCl-	-16.4	48.6	79.9493
PH2SO-		80.9569	4		80.85	81.1	+	4	100	CH2SCl-	1.8	57.1	80.9571	CO2^37Cl-	12.2	100	80.9563	Si2C2H-	-61.2	100	80.9622
AlH3-		81.953	7.1		81.86	82.08	+	7.1	100	TiH2O2-	-4.9	100	81.954	C3^46Ti-	4.8	9.1	81.9532	SNCH-	14.6	100	8.9524
H3SO3-		82.9808	-10		82.86	83.12	narrow	-10	100	CH2SNNa-	-13.3	100	82.9811	O4F-	16.8	100	82.9786	C2H3OCa-	-18.4	100	82.9815
C3HO3-		84.9931	-4.5		84.87	85.13	none	-4.5	100	^30SiC3H3O-	0.3	2.2	84.9827	Si2C2H5-	-9.3	100	84.9935	SiHN4-	-57.2	100	84.9976
Cl2O-		85.9332	-113.7		85.86	85.97	+	-113.7	100	C^37Cl2-	-104.2	6.6	85.9324	CGe-	19.5	51.9	85.9217	RbH-	37.7	100	85.9202
KSO-		86.9312	-8.4		86.85	86.98	none	-8.4	100	CHGe-	11	60.4	86.9296	^53H2S-	18.3	10.6	86.9289	COCo-	21.2	100	86.9287
C2H3N2O2-		87.02	20.7		86.98	87.14	none	20.7	100	^13CC3H3OF-	12.7	3.3	87.0207	^30SiC2H5N2-	25.4	3.8	87.0196	C6^13CH2-	25.8	5.7	87.0196
MnHS-		87.9185	-16.9		87.84	88.07	none	-16.9	100	^87RbH-	-6.3	5.2	87.9176	^72GeO-	-6.1	9.2	87.9175	^87SrH-	-2.8	2.5	87.9173
MnH2S-		88.9263	-50.7		88.85	88.98	none	-50.7	100	AsN-	-38.3	100	88.9252	^72GeOH-	-39.9	35	88.9254	^57FeO2-	-44.6	9.4	88.9258
C2H6O2Al-		89.0189	-3.7		88.98	89.16	none	-3.7	100	C2H5SN2-	7.2	100	89.0179	SiCh5N2O-	9.8	100	89.0177	C2^13CH4O3-	-15.8	3.2	89.0199
CSNO2-		89.9655	2.5		89.95	90.17	none	2.5	100	SiNO3-	5	100	89.9653	^30SiCH2SN-	7	63.7	89.9651	CH2NO^46Ti-	-11.9	11.2	89.9668	3 bumps on peak, possible overlap
CaH3SO-		90.9536	-16.3		90.82	91.14	none	-16.3	100	CHNOTi-	-24.1	100	90.9543	CH3S^44Ca-	6	2.4	90.9516	Si2H3S-	23.9	100	90.9499	3 bumps on peak, possible overlap
S2N2-		91.9508	8.7		91.84	92.11	none	8.7	100	CH3SSc-	-4	100	91.952	^41KH3SO-	-13	11.9	91.9528	CH3O^61Ni-	17.8	1.4	91.95	shouldered +
SiHSO2-		92.9472	-15.4		92.83	92.98	none	-15.4	100	CHO2Ti-	-4.1	100	92.9461	ScSNH2-	-16	100	92.9473	CH2N^66Cu-	-14	60.7	92.9471
C3HN4-		93.0207	1.5		92.98	93.14	none	1.5	100	C5H3NO-	-12.9	100	93.022	C2H5O4-	15.9	100	93.0193	C3H9Ti-	20.3	100	93.0189
Na2SO-		93.9471	-0.1		93.82	94.13	none	-0.1	100	CoH3O2-	0.1	100	93.9471	^77SeNH3-	0.5	44.7	93.947	CH3S^47Ti-	-8.5	18.3	93.9479	shouldered +
Na2SOH-		94.9549	7.3		94.84	95.14	none	7.3	100	CH4OCu-	-8.1	100	94.9564	^29SiH2SO2-	10.5	3.3	94.9546	^29SiSiC2N-	-15.3	7	94.957	shouldered +
Si2C2O-		95.9493	-17.6		95.82	96.15	none	-17.6	100	CHNO^53Cr-	6.4	7.7	95.947	ScH3SO-	7.4	100	95.9469	CH3O^65Cu-	9.4	14.9	95.9467
C3HSN2-		96.9866	0.4		96.84	97.19	none	0.4	100	SiC2HN2O-	2.8	100	96.9864	C2H4O2^37Cl-	-9.8	19.6	96.9876	^29SiSiC3H4-	14	13.5	96.9853	two peaks not distinguished by program
SiCl2-		97.9152	70.1		97.83	97.95	none	70.1	100	^96MoH2-	11.9	100	97.9209	CHS^53Cr-	9.7	17.8	97.9211	CHRb-	19.2	100	97.9202
C4H2O3		98.0009	-5		97.95	98.17	none	-5	100	^30SiC4H4O-	-0.8	4.5	98.0005	Si2C3H6-	-9.2	100	98.0014	^30SiC2H2N3-	12.9	4.2	97.9992
Si3CH3-		98.9548	-8.3		98.83	99.19	none	-8.3	100	CH2SNK-	-10.8	100	98.9551	Si^30SiC2HO-	0	14.5	98.954	^30SiC3HS-	-2.3	16	98.9542	shouldered +
CHSOK-		99.9391	-25.4		99.84	100.1	none	-25.4	100	VO3H-	-5.6	100	99.9371	CH3S^53Cr-	-2.2	5.6	99.9367	CH3Rb-	7.1	100	99.9358
Si2CHO2-		100.952	0.3		100.85	101.15	none	0.3	100	CSNOAl-	-0.6	100	100.952	SN^37ClOH2-	-0.7	28.4	100.952	^30SiSi2CH3-	4.4	8.5	100.952	shouldered +
CaSNO-		101.933	-8		101.83	102.11	none	-8	100	CHNAs-	-6.5	100	101.933	CH2O^72Ge-	-7.9	100	101.933	CH3^87Si-	-5.1	36.1	101.933
FeSNH-		102.918	41.5		102.84	103.09	none	41.5	100	SINH-	55.1	100	102.917	^70GeO2H-	2.8	9.5	102.922	CH2Y-	6.7	100	102.922
FeSO-		103.903	35.4		103.81	104.07	none	35.4	100	SiO-	48.9	100	103.901	MnSOH-	-69.8	100	103.913	^104Ru-	1.7	21.3	103.906
FeSOH-		104.91	44		104.82	105.11	none	44	100	CHS^60Ni-	35.1	100	104.911	CH^92Mo-	-2.5	19.1	104.915	^104RuH-	10.6	92.4	104.914
SiSN2-		105.925	-19.6		105.81	106.16	+	-19.6	100	CH2^92Mo-	-3.7	60.4	105.923	CSNTi-	-9.7	100	105.924	ZiNH2-	-12.9	100	105.924	shouldered +
ZrOH-		106.908	5.9		106.8	107.16	none	5.9	100	CHS^62Ni-	-1.6	27.1	106.909	NbN-	-12.9	100	106.91	^61NiSN-	17.5	3.1	106.907	shouldered +
Si2H6NO2-		107.994	-8.6		107.95	108.16	none	-8.6	100	SiCH6SNO-	-10.8	100	107.994	^30SiCH4NO3-	-1.1	1.4	107.993	C5H2SN-	18.3	100	107.991
CH3S2NO-		108.965	7.5		108.79	109.17	none	7.5	100	^29SiC4O2	0.9	10.5	108.967	Si2C2HN2-	-12.9	100	108.968	SiH23SNO2-	9.6	100	108.966	wide - shoulder
CaCl2-		109.901	-17.5		109.8	109.95	none	-17.5	100	CS^66Zn-	2.4	88.2	109.899	Ti2N-	-5.5	100	109.9	^77SeHS-	-13.1	14.7	109.9
C4H2SN2-		109.994	6		109.95	110.17	none	6	100	C3H5O2^37Cl-	-2.9	56.7	109.995	^29SiCH5O4-	-6.8	11.6	109.996	SiC3H2N2O-	8.1	100	109.994
C6H4Cl-		111.001	1.2		110.94	111.19	none	1.2	100	C5^13CF2-	1.2	5.6	111.001	SiCHN5-	1.5	100	111.001	CH5SNO3-	11.5	100	111
Fe2-		111.87	180.4		111.79	111.95	none	180.4	100	Ti2O-	-6.6	100	111.891	ZnSO-	-54.1	100	111.897	SeS-	13.2	100	111.889
C5H4O3-		112.017	-0.5		111.95	112.22	none	-0.5	100	Si2C4H8-	-4.2	100	112.017	C3H2N3O2-	11.5	100	112.015	^30SiC5H6O-	3.2	3.3	112.016
SiC3HO3-		112.97	-5.5		112.81	113.19	none	-5.5	100	C4HO2-	-7.5	100	112.97	Si^30SiC3H3O-	-1.9	3.9	112.97	SiC2HSN2-	52.3	100	112.963	small - shoulder
CSNFe-		113.911	-21.5		113.8	113.96	none	-21.5	100	^100RuN-	3	100	113.908	CNSr-	-9.3	100	113.909	Ti2H2O-	10.3	100	113.907
Ca2OF-		114.919	7.1		114.8	114.98	none	7.1	100	ZnH3SO-	-2.6	100	114.92	CrSNOH-	8	100	114.919	CH2ORb-	-26.5	100	114.923
C4H7SN2-		115.034	2.5		114.98	115.22	none	2.5	100	SiC3H7N2O-	4.5	100	115.033	C2^13CH4N3O2-	-3.6	2.5	115.034	^13CC2H5OF3-	5.9	1.9	115.033
Si3O2-		115.921	-4.9		115.81	116.09	none	-4.9	100	CH2Ru-	0.4	24.6	115.921	Si2CSO-	-6.9	100	115.921	SiC2S2-	-8.8	100	115.922
Si2HSN2-		116.94	10.9		116.83	117.12	none	10.9	100	VH2O4-	16.2	100	116.94	HOFAl3-	-39.2	100	116.946	CH3NO^72Ge-	-20.2	16.3	116.944
C4Cl2-		117.938	7.3		117.83	118.13	none	7.3	100	^29SiSiHSN2-	-7.6	32	117.94	SiC2H2S2-	15.7	100	117.937	Si2CH2SO-	17.6	100	117.937
SiCHS2N-		118.933	2.8		118.83	119.11	none	2.8	81.9	^54CrSNOH3-	-1.1	2.7	118.933	Si2HSNO-	4.7	87.2	118.932	CSNOSc-	53.2	100	118.927
Si2O4-		119.934	-12.6		119.83	120.13	+	-12.6	100	RhNH3-	-0.5	100	119.933	CH3SNCo-	1.5	100	119.932	MnSNOH3-	3.4	100	119.932
Si3C3H3-		122.955	1.9		122.8	123.18	none	1.9	100	S2N3OH-	-13.1	100	122.957	^29SiSiH4SNO-	-2.3	15.1	122.955	^30SiC5HS-	6.7	50.3	122.954	2 peaks
Si3C2H2N-		123.95	-1.3		123.79	124.14	none	-1.3	100	O2F2Al2-	-3	100	123.95	^30SiC4SN-	3.4	23.3	123.95	C3H2OCl2-	8.6	100	123.949
Si4CH-		124.916	-28.8		124.79	124.96	none	-28.8	100	^94ZrNOH-	-1.6	100	124.913	GeH3SO-	2.4	100	124.912	CH2SOCu-	-2.4	100	124.913
C5H5N2O2		125.036	3.5		124.96	125.19	none	3.5	100	^13CC6H5OF-	-2.1	2.7	125.036	^29SiSiH10N3O-	-2.2	3.9	125.036	^30SiC5H7N2-	6.8	2.7	125.035
Si4CH2-		125.924	-56.6		125.78	125.98	none	-56.6	100	Si^30SiC3S-	-51.9	12.5	124.953	CH2SN^66Zn-	-4.8	65	125.917	CHN^99Ru-	-4.9	48.6	125.917
C5H6N2O2-		126.043	5		125.98	126.19	none	5	100	^29SiSiH11N3O-	-0.6	32.5	126.044	^29SiCH11SN3-	-2.4	23.4	126.044	^30SiC5H8N2-	8.2	3.3	126.043
C8H8Na-		127.053	7.5		126.98	127.21	none	7.5	100	^13CC3H8O2F2-	5.8	0.7	127.053	C10H7-	-11.4	100	127.055	^29SiSiH12N3O-	14.7	1.8	127.052
KClF-		127.9	-14.7		127.77	127.98	none	-14.7	100	S^81BrNH-	-10.4	100	127.9	^96SrO2-	-1.4	20.9	127.899	^112CdO-	2	93.3	127.898
C9H6N-		128.051	4.8		127.98	128.21	none	4.8	100	SiC3H8N4-	4.8	100	128.052	SiH10N3O3-	11.7	100	128.05	SiC5H10NO-	-19.7	100	128.054
Si3CHS-		128.911	24		128.79	128.99	none	24	100	Si4HO-	4.2	100	128.911	^98RuNOH-	-0.9	9.6	128.912	MoNOH-	-1.8	100	128.912
C9H7N-		129.058	5.1		129	129.23	none	5.1	100	SiC3H9N4-	-8.9	100	129.06	Si2C5H13-	22.6	100	129.056	C6H9O3-	25.8	100	129.056
Si2SN3-		129.936	-8		129.79	130.23	none	-8	100	CH3SNO^53Cr-	-0.6	23.3	129.935	CH3NORb-	6.6	100	129.934	^29SiSi3H3N-	2.2	23.3	129.935	wide + shoulder
Si3HSN-		130.914	28.4		130.79	131.2	none	28.4	100	CHN^104Pd-	19.3	100	130.916	CH2O^101Ru-	10.1	64.9	130.917	CHN^104Ru-	8.7	48.4	130.917	+ shoulder
SiS2N3-		133.931	-5.1		133.778	134.188	none	-5.1	100	^117SnNH3-	0.8	92.7	133.93	^29SiSi2H3SN-	4.8	79.2	133.94	^30SiSiCO4-	-5.6	24.6	133.931
Si3H3SO-		134.922	-6.5		134.797	135.165	none	-6.5	100	^30SiC2HSO2-	-2.1	21.2	134.921	Si^30SiCHSO2-	-0.4	20	134.921	SiCH3S2-	-8.2	100	134.922
Si2H2S2N-		135.917	12.7		135.8	136.129	none	12.7	100	^71GaSNOH3-	1.5	7.8	135.919	^104PdNOH2-	5.7	3.3	135.918	C2H2^110Cd-	-1.6	3.4	135.919
C2HO2Ca2-		136.923	6.2		136.808	137.124	none	6.2	100	Si2H3S2N-	-6.2	100	136.925	^30SiCHS2NO-	-0.3	2.9	136.924	^30SiSiHSNO2-	1.4	2.7	136.924
Si4C2H2-		137.924	-0.9		137.806	138.145	none	-0.9	100	CH3OAg-	-1.8	27.9	137.924	Si^30SiC4S-	3.4	40	137.923	^30SiSi2C3O-	5	38.2	137.923
Si4CHO-		140.911	-9.6		140.779	140.977	none	-9.6	100	^124SnOH-	7.6	91.4	140.909	^110CdNOH-	1.9	31.2	140.909	CH3SO^78Se-	9.4	29.1	140.908
H2O2Al4-		141.932	10.4		141.761	142.204	none	10.4	100	Na2SO4-	13	100	141.932	Si3^29SiCH3N-	-5	44.4	141.934	Si3N3O-	-12.7	100	141.935	+ shoulder
Fe2O2-		143.86	58.6		143.739	143.933	none	58.6	100	^96MoSO-	-24.4	100	143.872	^10AgCl-	-37.9	100	143.874	Zn2O-	103.9	100	143.854
SiC7H4N2-		144.015	3.8		143.936	144.276	none	3.8	100	^29SiC7H4N2-	1.7	20.2	144.015	^30SiC2H4N5O-	-3	3.9	144.016	^13CC6H2F3-	4.9	16.2	144.015
Ca2HS2-		144.878	-6.2		144.753	144.921	none	-6.2	100	^113InS-	0.8	13.6	144.877	CaCl3-	49	100	144.87	^113CdS-	-1.6	38.2	144.877
C7HN2O2-		145.004	5.4		144.925	145.279	none	5.4	100	Si^29SiC2H6N3O-	0.5	6.7	145.005	^30SiC7H3N2-	8.2	4.2	145.004	C6H6O2Cl-	-7.2	100	145.006
Si4H2S-		145.896	-1.3		145.764	146.154	none	-1.3	100	CH2S^100Mo-	0.3	11.4	145.896	Si^30SiC2S2-	2.8	4.4	145.895	^98RuSNH2-	-5.8	3.9	145.897
Si3HS2-		148.883	6.6		148.765	149.109	none	6.6	100	CHS^104Pd-	-1.4	4.1	148.885	^116CdHS-	-6.2	4.1	148.885	^100MoSOH-	9.6	4.6	148.883
Si3H2S2-		149.891	1.8		149.763	150.139	none	1.8	100	^118SnO2-	-3.9	22.9	149.892	^100MoH2SO-	4.9	18	149.891	^30SiCS2O-	7.3	100	149.89
Unassigned Peaks
		Mean Mass								Potential Identity1				Potential Identity 2				Potential Identity 3
		2.0178								H2	791.8	100	2.0162
		7.02								Li-	484.6	100	7.0166	^6LiH-	-504.5	0.4	7.0235	N--	2545.4	100	7.0021
		14.021								CH2-	310.5	100	14.0162	^13ChH-	629.3	15.4	14.0117	BH3-	-911.4	100	14.0333
		15.03								CH3-	411.6	100	15.024	^13CH2-	709	2.6	15.0196	NH-	1248.3	100	15.0114
		38.013								CH3Na-	-11	100	38.0138	B2O-	-18.4	100	38.0141	C2^13CH-	43.3	21.3	38.0117
		39.02								C2^13CH2	25.6	6.9	39.0196	CHO^10B-	110.9	84.4	39.0162	CH2OBe-	-70.3	100	39.0233
		51.02								^13CH3OF-	16.6	4.6	51.0207	C4H3-	-48.7	100	51.024	NOH2F-	175.4	100	51.0126
		52.01								CNO^10B-	3.5	23.5	52.0115	CH2F2	-25.9	100	52.013	^13CHF-	60.1	2	52.0085
		53								H2O2F-	4.5	100	53.0044	CH2SLi-	7.5	100	53.0043	C3HO-	26.1	100	53.0033
		55.02								C3H3O-	-31.1	100	55.0189	C2^13CH2O-	50.1	100	55.0189	C2H4Al-	69.8	100	55.0134
		57.03								C3H5O-	-15.1	100	57.0346	C2^13CH4O-	57.0301	63.3	0.4	C2H6Al-	82.3	100	57.029
		57.98								CHPN-	-10.4	100	57.9852	^25MgO2H-	9.8	8.4	57.984	NaH3S-	-21.7	100	57.9859
		61.97								C2H^37Cl-	-15	100	61.9743	^29SiHO2-	-21.8	17.4	61.9747	Na2O-	-26.7	100	61.975
		65								H3OFAl-	8.8	100	64.9989	^13CHO2F-	-7.8	4.8	65	C3^13CO-	9.8	11.6	64.9988
		74								SiCH4NO-	-11.4	100	74.0068	C2H4SN-	-14.5	100	74.007	BeSNOH3-	-4.7	100	74.0063
		83.99								CH3SNNa-	-9	100	83.9889	SiN4-	-19	100	83.9898	CH3NOK-	29.3	100	83.9857
		86								CH3SNOBe-	-5	100	86.0063	SiC2H4NO-	-10.8	100	86.0068	C3H4SN-	-13.5	100	86.007
		107.91								CHSCu-	2.8	100	107.91	^94ZrN-	3.8	100	107.91	^76GeO2-	-13.3	22.3	107.912
		110.92								^77SeH2S-	0.3	17.3	110.908	^94MoOH-	-1.4	90.2	110.908	BrO2-	-4.5	100	110.909
		114								C2H4O3F2-	2.4	100	114.013	^30SiSiC4H8-	-1.6	10.9	114.014	SiC4H6O2	-5.1	100	114.014
		120.91								C3O3^37Cl-	-10.9	100	120.951	^30SiSiH3SN2-	-25.3	100	120.953	SiHSN2O2-	-28.7	100	120.953
		121.9								^76GeSN-	-2	100	121.897	CSO^62Ni-	7.9	25.9	121.896	Si^30SiS2-	12	100	121.895
		121.99								C4H7O2Cl-	-1.4	99.7	122.014	^13CC3H3O2F2-	-1.5	18	122.014	SiCh6N2O3-	-12.2	100	122.015
		126.88								NbH2S-	-77.1	100	126.895	^94MoHS-	-5.3	3.3	126.885	^SBrO-	-8	8.6	126.886
		131.88								^98RuH2S-	-2.5	4.2	131.894	Si3SO-	-38.5	100	131.898	Si2CS2-	-40.3	100	131.899
		132.906								CSb-	4.8	80.3	132.094	^116SnOH-	-0.2	36	132.905	Cs-	-7.4	100	132.906
		138.906								^123SbNH2-	4.2	100	138.923	^29SiSi3C2H2-	4.3	20.2	138.923	PdNOH3-	-10.2	35.5	138.925
		139.898								YH3SO-	-0.2	100	139.897	CNOCuCl-	-1.1	100	139.897	CSNO^66Zn-	1.3	100	139.897
		140.01								^30SiCH8N3O3-	1.4	8.5	140.031	Si2H10N3O2-	-4.4	100	140.032	C4^13CH5N3O2-	1.7	17.4	140.031
		141.012								Si2C5H11N-	4.5	100	141.044	C6H7NO3-	7.4	100	141.043	^30SiSiH11N4O-	-2.4	9.3	141.044
		142.898								^95MoSNH2-	2.2	72.4	142.897	^92MoH3SO-	-2.2	100	142.898	CuPO3H-	7.1	100	142.897
		143.064								^13CC4H9OF3-	-1.1	2.2	143.065	SiC5H11N2O-	-2.2	100	143.065	C6H11SN2-	-3.8	100	143.065
		146.891								CHNO^104Pd-	-0.6	41.7	146.91	Si2CHS2N-	5.9	100	146.909	Si3HSNO-	7.5	100	146.909
		147.863								^99RuSOH-	1.4	2.2	147.881	IrHS-	-19	100	147.884	CHSRh-	-30	100	147.886
