# Supplementary material for: Putative fossil blood cells reinterpreted as diagenetic structures
Source: PeerJ. 2021 Dec 16;9:e12651. doi: 10.7717/peerj.12651 (PMC8684720; doi:10.7717/peerj.12651)
Supplement: Supplemental Information 2 — Each spectrum represents a reading at 1/10 power unless otherwise specified. A brief description of each point is in the sheet title. [file peerj-09-12651-s002.xlsx]

## Sheet: VTL4_pos1_indistroundfill
100	154.255
100.692	158.22
101.383	133.254
102.075	194.591
102.767	174.841
103.458	140.976
104.15	188.641
104.842	155.9
105.533	148.924
106.225	120.457
106.917	148.97
107.608	190.071
108.3	199.572
108.992	192.273
109.683	107.011
110.375	153.761
111.067	146.935
111.758	143.681
112.45	134.338
113.142	61.8886
113.833	96.1784
114.525	104.025
115.217	129.876
115.908	152.382
116.6	171.137
117.292	184.164
117.983	158.363
118.675	159.785
119.367	199.317
120.058	154.004
120.75	111.9
121.442	132.335
122.133	145.715
122.825	42.5173
123.517	120.895
124.208	100.785
124.9	95.8263
125.592	146.289
126.283	183.178
126.975	106.055
127.667	130.382
128.358	135.666
129.05	182.557
129.742	198.629
130.433	155.427
131.125	162.945
131.817	247.791
132.508	225.757
133.2	199.896
133.892	194.887
134.583	185.066
135.275	156.64
135.967	231.257
136.658	164.454
137.35	185.999
138.042	233.159
138.733	205.604
139.425	120.262
140.116	156.72
140.808	199.247
141.5	239.162
142.191	202.091
142.883	204.274
143.575	220.424
144.266	161.158
144.958	174.23
145.65	171.976
146.341	156.008
147.033	153.385
147.725	194.359
148.416	231.896
149.108	156.919
149.8	177.799
150.491	149.753
151.183	162.31
151.875	165.102
152.566	164.511
153.258	194.53
153.95	227.839
154.641	224.895
155.333	229.582
156.025	238.53
156.716	204.148
157.408	151.31
158.1	169.864
158.791	220.98
159.483	212.297
160.175	193.3
160.866	198.419
161.558	217.509
162.25	208.417
162.941	132.993
163.633	130.525
164.325	194.461
165.016	225.601
165.708	242.508
166.4	220.83
167.091	153.386
167.783	196.106
168.475	153.597
169.166	187.825
169.858	210.798
170.55	227.478
171.241	234.147
171.933	214.237
172.625	278.146
173.316	217.564
174.008	107.088
174.7	156.558
175.391	243.92
176.083	245.707
176.775	255.281
177.466	189.873
178.158	186.698
178.85	227.246
179.541	199.072
180.233	129.45
180.925	106.778
181.616	138.999
182.308	137.232
183	196.197
183.691	190.596
184.383	181.913
185.075	174.629
185.766	144.791
186.458	186.727
187.15	190.93
187.841	179.77
188.533	179.956
189.225	196.194
189.916	215.624
190.608	216.815
191.3	184.546
191.991	148.393
192.683	156.561
193.375	181.809
194.066	187.092
194.758	159.307
195.45	131.91
196.141	203.65
196.833	177.708
197.525	156.135
198.216	178.323
198.908	178.815
199.6	152.763
200.291	200.269
200.983	294.441
201.675	206.408
202.366	193.111
203.058	178.747
203.75	152.711
204.441	175.427
205.133	291.819
205.825	239.661
206.516	186.047
207.208	208.432
207.9	243.718
208.591	239.333
209.283	203.912
209.975	205.754
210.666	256.151
211.358	247.457
212.05	201.61
212.741	167.351
213.433	179.27
214.125	222.548
214.816	235.331
215.508	210.613
216.199	169.191
216.891	160.294
217.583	192.844
218.274	182.867
218.966	141.514
219.658	213.744
220.349	232.003
221.041	261.707
221.733	252.765
222.424	193.959
223.116	192.437
223.808	245.504
224.499	196.712
225.191	160.369
225.883	205.461
226.574	236.242
227.266	243.908
227.958	247.757
228.649	235.461
229.341	170.666
230.033	111.758
230.724	202.432
231.416	104.798
232.108	173.027
232.799	233.603
233.491	179.835
234.183	141.697
234.874	136.775
235.566	204.492
236.258	259.852
236.949	255.647
237.641	237.893
238.333	228.369
239.024	200.468
239.716	128.514
240.408	178.082
241.099	160.751
241.791	199.514
242.483	198.746
243.174	177.111
243.866	189.32
244.558	162.689
245.249	187.428
245.941	169.774
246.633	227.748
247.324	269.263
248.016	259.635
248.708	239.81
249.399	264.754
250.091	256.466
250.783	227.04
251.474	266.244
252.166	273.656
252.858	241.862
253.549	216.921
254.241	234.113
254.933	259.894
255.624	314.323
256.316	294.705
257.008	320.455
257.699	272.737
258.391	202.188
259.083	246.712
259.774	327.645
260.466	345.076
261.158	336.862
261.849	291.66
262.541	294.731
263.233	324.444
263.924	310.375
264.616	258.588
265.308	396.614
265.999	321.008
266.691	229.887
267.383	203.508
268.074	246.355
268.766	282.34
269.458	238.722
270.149	187.336
270.841	223.459
271.533	266.478
272.224	258.123
272.916	228.215
273.608	238.999
274.299	274.795
274.991	231.953
275.683	300.504
276.374	285.125
277.066	288.939
277.758	291.627
278.449	269.158
279.141	254.881
279.833	295.234
280.524	318.568
281.216	199.606
281.908	268.121
282.599	264.218
283.291	273.395
283.983	271.011
284.674	242.437
285.366	287.439
286.058	178.273
286.749	193.669
287.441	245.58
288.133	254.838
288.824	250.122
289.516	235.841
290.207	203.391
290.899	231.162
291.591	297.367
292.283	251.094
292.974	253.525
293.666	258.155
294.357	236.229
295.049	202.525
295.741	202.726
296.432	294.668
297.124	265.364
297.816	314.991
298.507	319.909
299.199	314.261
299.891	294.916
300.582	229.942
301.274	158.657
301.966	307.995
302.657	265.593
303.349	252.452
304.041	262.683
304.732	264.06
305.424	259.107
306.116	259.676
306.807	231.193
307.499	200.282
308.191	193.596
308.882	190.378
309.574	202.547
310.266	178.415
310.957	146.588
311.649	178.235
312.341	174.379
313.032	165.349
313.724	185.597
314.416	190.971
315.107	168.181
315.799	153.352
316.491	164.42
317.182	170.797
317.874	147.986
318.566	155.397
319.257	205.022
319.949	150.534
320.641	122.859
321.332	133.263
322.024	155.587
322.716	208.632
323.407	197.409
324.099	200.541
324.791	158.249
325.482	150.11
326.174	164.194
326.866	160.863
327.557	134.22
328.249	118.965
328.941	104.387
329.632	186.831
330.324	143.52
331.016	180.603
331.707	120.842
332.399	100.883
333.091	160.006
333.782	43.2227
334.474	130.673
335.166	138.588
335.857	172.323
336.549	183.686
337.241	132.48
337.932	125.276
338.624	175.448
339.316	134.459
340.007	121.172
340.699	178.485
341.391	161.244
342.082	148.328
342.774	143.242
343.466	108.294
344.157	70.792
344.849	103.214
345.541	126.781
346.232	144.48
346.924	75.5904
347.616	105.65
348.307	157.997
348.999	136.481
349.691	90.0828
350.382	139.097
351.074	201.961
351.766	66.1172
352.457	90.8613
353.149	178.826
353.841	198.135
354.532	179.17
355.224	156.732
355.916	128.412
356.607	123.723
357.299	91.188
357.991	151.221
358.682	152.486
359.374	97.9373
360.066	109.218
360.757	125.371
361.449	91.9194
362.14	153.174
362.832	143.141
363.524	142.261
364.216	112.733
364.907	185.787
365.599	196.426
366.291	170.133
366.982	181.148
367.674	185.129
368.365	155.241
369.057	126.669
369.749	148.093
370.44	164.914
371.132	219.774
371.824	213.63
372.515	168.29
373.207	168.143
373.899	125.647
374.59	184.768
375.282	202.035
375.974	257.672
376.665	225.866
377.357	196.251
378.049	180.736
378.74	169.372
379.432	194.112
380.124	140.177
380.815	118.34
381.507	200.263
382.199	187.622
382.89	176.883
383.582	160.704
384.274	158.877
384.965	196.711
385.657	178.806
386.349	164.208
387.04	106.651
387.732	145.195
388.424	172.064
389.115	185.014
389.807	199.353
390.499	202.262
391.19	166.683
391.882	111.483
392.574	160.56
393.265	201.069
393.957	158.899
394.649	146.689
395.34	130.752
396.032	134.476
396.724	183.815
397.415	197.265
398.107	195.723
398.799	160.467
399.49	112.195
400.182	143.931
400.874	178.393
401.565	199.744
402.257	186.466
402.949	142.268
403.64	171.826
404.332	252.527
405.024	146.634
405.715	122.825
406.407	150.439
407.099	184.323
407.79	188.965
408.482	162.657
409.174	145.714
409.865	177.864
410.557	114.687
411.249	116.996
411.94	120.069
412.632	104.787
413.324	147.627
414.015	160.043
414.707	107.941
415.399	100.242
416.09	134.239
416.782	134.291
417.474	159.114
418.165	174.379
418.857	134.18
419.549	96.1043
420.24	79.3313
420.932	126.431
421.624	242.47
422.315	208.779
423.007	106.284
423.699	143.967
424.39	184.491
425.082	197.419
425.774	171.371
426.465	150.22
427.157	153.062
427.849	150.878
428.54	151.564
429.232	188.708
429.924	157.319
430.615	130.479
431.307	206.745
431.999	181.662
432.69	147.22
433.382	150.073
434.074	106.796
434.765	143.597
435.457	138.253
436.149	160.765
436.84	184.397
437.532	157.142
438.224	178.094
438.915	176.718
439.607	162.985
440.298	204.105
440.99	207.213
441.682	168.453
442.373	126.7
443.065	167.408
443.757	123.918
444.448	154.205
445.14	176.292
445.832	174.05
446.523	178.713
447.215	145.282
447.907	155.366
448.598	173.154
449.29	231.784
449.982	236.588
450.673	158.232
451.365	166.909
452.057	218.024
452.748	217.456
453.44	196.235
454.132	170.314
454.823	87.6653
455.515	218.227
456.207	177.604
456.898	189.707
457.59	153.331
458.282	152.357
458.973	185.04
459.665	191.175
460.357	221.788
461.048	186.599
461.74	214.468
462.432	145.938
463.123	166.853
463.815	180.913
464.507	163.903
465.198	185.471
465.89	226.233
466.582	209.17
467.273	210.732
467.965	212.384
468.657	159.343
469.348	135.421
470.04	181.149
470.732	173.717
471.423	164.761
472.115	205.932
472.807	263.971
473.498	284.377
474.19	260.53
474.882	172.675
475.573	175.724
476.265	182.354
476.957	223.406
477.648	223.524
478.34	196.771
479.032	179.778
479.723	169.656
480.415	153.447
481.107	162.391
481.798	235.627
482.49	189.367
483.182	197.732
483.873	203.151
484.565	162.957
485.257	169.212
485.948	212.927
486.64	199.989
487.332	149.227
488.023	102.106
488.715	148.644
489.407	221.333
490.098	219.846
490.79	165.318
491.482	157.087
492.173	196.318
492.865	195.663
493.557	151.727
494.248	181.397
494.94	199.538
495.632	124.714
496.323	191.921
497.015	200.663
497.707	175.063
498.398	174.071
499.09	144.96
499.782	104.308
500.473	139.316
501.165	215.805
501.857	166.846
502.548	163.828
503.24	184.719
503.932	195.025
504.623	188.546
505.315	169.691
506.007	152.384
506.698	168.884
507.39	178.466
508.082	126.007
508.773	153.578
509.465	106.544
510.157	108.012
510.848	177.993
511.54	164.9
512.232	164.028
512.923	175.206
513.615	172.992
514.307	148.376
514.998	113.236
515.69	111.062
516.382	167.396
517.073	168.841
517.765	206.867
518.456	116.359
519.148	108.355
519.84	141.704
520.531	158.913
521.223	146.622
521.915	130.106
522.607	142.499
523.298	148.943
523.99	180.175
524.681	171.641
525.373	146.831
526.065	173.171
526.756	154.131
527.448	185.38
528.14	189.9
528.831	142.11
529.523	152.813
530.215	166.497
530.906	178.654
531.598	213.591
532.29	156.557
532.981	140.722
533.673	127.434
534.365	104.819
535.056	122.519
535.748	140.056
536.44	138.944
537.131	172.153
537.823	164.863
538.515	99.8775
539.206	111.254
539.898	136.59
540.59	140.084
541.281	151.735
541.973	143.877
542.665	110.708
543.356	108.001
544.048	126.049
544.74	93.7014
545.431	101.365
546.123	171.678
546.815	152.144
547.506	117.418
548.198	131.044
548.89	137.484
549.581	121.507
550.273	137.477
550.965	171.556
551.656	174.704
552.348	146.894
553.04	94.5976
553.731	113.192
554.423	171.254
555.115	184.678
555.806	135.708
556.498	144.746
557.19	143.698
557.881	131.907
558.573	171.199
559.265	195.726
559.956	127.252
560.648	118.509
561.34	40.843
562.031	132.201
562.723	106.704
563.415	129.815
564.106	90.5589
564.798	152.339
565.49	174.212
566.181	139.493
566.873	109.058
567.565	83.1364
568.256	100.475
568.948	161.089
569.64	156.162
570.331	85.9977
571.023	131.173
571.715	190.287
572.406	120.714
573.098	134.731
573.79	148.203
574.481	138.949
575.173	168.647
575.865	164.164
576.556	134.789
577.248	110.688
577.94	175.319
578.631	108.34
579.323	122.151
580.015	97.4597
580.706	119.191
581.398	105.449
582.09	101.814
582.781	148.608
583.473	192.972
584.165	201.497
584.856	127.353
585.548	93.8706
586.24	97.8956
586.931	94.9244
587.623	64.7569
588.315	156.177
589.006	134.701
589.698	120.186
590.39	119.855
591.081	111.544
591.773	120.178
592.464	87.412
593.156	137.268
593.848	127.83
594.539	172.184
595.231	139.724
595.923	81.4809
596.615	93.5955
597.306	133.434
597.998	110.29
598.689	84.7537
599.381	108.204
600.073	141.168
600.764	155.6
601.456	113.826
602.148	121.634
602.839	151.341
603.531	128.918
604.223	162.546
604.914	108.965
605.606	105.124
606.298	120.142
606.989	114.215
607.681	110.29
608.373	150.549
609.064	212.193
609.756	183.908
610.448	115.689
611.139	100.118
611.831	130.097
612.523	67.4325
613.214	141.949
613.906	136.046
614.598	123.618
615.289	99.3109
615.981	90.3579
616.673	118.377
617.364	147.773
618.056	167.815
618.748	113.771
619.439	155.92
620.131	141.706
620.823	179.48
621.514	130.976
622.206	112.179
622.898	125.286
623.589	133.444
624.281	109.158
624.973	92.4481
625.664	113.177
626.356	131.016
627.048	131.566
627.739	159.355
628.431	208.757
629.123	133.315
629.814	150.838
630.506	123.512
631.198	114.781
631.889	136.718
632.581	142.717
633.273	128.354
633.964	93.7834
634.656	96.348
635.348	144.65
636.039	98.2428
636.731	150.076
637.423	91.5178
638.114	189.081
638.806	99.9366
639.498	96.3097
640.189	142.562
640.881	118.25
641.573	115.404
642.264	108.599
642.956	106.099
643.648	99.4883
644.339	69.5244
645.031	113.054
645.723	115.99
646.414	149.286
647.106	102.021
647.798	129.489
648.489	151.372
649.181	173.813
649.873	115.472
650.564	130.442
651.256	103.714
651.948	106.14
652.639	145.08
653.331	126.989
654.023	125.994
654.714	127.791
655.406	138.583
656.098	114.047
656.789	164.303
657.481	81.6891
658.173	136.538
658.864	139.072
659.556	140.594
660.248	132.334
660.939	97.202
661.631	104.439
662.323	137.577
663.014	114.224
663.706	112.172
664.398	213.916
665.089	195.883
665.781	164.824
666.473	92.5197
667.164	187.553
667.856	159.587
668.547	126.383
669.239	144.808
669.931	131.139
670.622	97.0917
671.314	143.039
672.006	157.966
672.698	91.255
673.389	124.992
674.081	139.391
674.772	151.036
675.464	134.671
676.156	107.126
676.847	102.124
677.539	142.273
678.231	160.527
678.922	179.241
679.614	87.3203
680.306	109.606
680.997	173.161
681.689	178.101
682.381	149.586
683.072	115.036
683.764	160.117
684.456	160.035
685.147	102.84
685.839	29.994
686.531	156.824
687.222	110.282
687.914	76.7223
688.606	101.891
689.297	151.892
689.989	125.324
690.681	113.634
691.372	118.371
692.064	117.807
692.756	134.306
693.447	140.138
694.139	103.568
694.831	42.884
695.522	163.318
696.214	150.749
696.906	112.26
697.597	140.952
698.289	166.368
698.981	140.219
699.672	131.556
700.364	155.819
701.056	152.294
701.747	133.349
702.439	126.994
703.131	112.503
703.822	104.661
704.514	142.857
705.206	161.245
705.897	168.251
706.589	104.061
707.281	163.294
707.972	141.893
708.664	143.248
709.356	146.944
710.047	110.559
710.739	79.3992
711.431	130.783
712.122	147.956
712.814	111.427
713.506	97.1665
714.197	128.169
714.889	143.999
715.581	83.952
716.272	100.22
716.964	111.779
717.656	146.771
718.347	105.195
719.039	110.983
719.731	148.147
720.422	110.427
721.114	92.5216
721.806	118.989
722.497	125.663
723.189	143.484
723.881	136.431
724.572	98.6562
725.264	98.4881
725.956	118.301
726.647	114.874
727.339	126.804
728.031	63.1238
728.722	133.503
729.414	161.277
730.106	129.907
730.797	83.7283
731.489	152.117
732.181	115.734
732.872	90.4812
733.564	113.695
734.256	107.855
734.947	92.7712
735.639	129.346
736.331	179.405
737.022	171.356
737.714	114.478
738.406	89.5196
739.097	161.786
739.789	117.485
740.481	104.175
741.172	119.079
741.864	119.87
742.556	121.542
743.247	95.9616
743.939	132.779
744.63	128.901
745.322	119.024
746.014	142.317
746.706	121.603
747.397	115.851
748.089	119.672
748.781	75.0172
749.472	83.2102
750.164	141.711
750.855	126.065
751.547	125.237
752.239	135.983
752.93	138.528
753.622	84.2176
754.314	147.977
755.005	130.952
755.697	94.0588
756.389	133.695
757.08	87.4251
757.772	67.1597
758.464	124.513
759.155	127.458
759.847	111.34
760.539	131.972
761.23	120.834
761.922	83.2065
762.614	84.316
763.305	124.041
763.997	108.017
764.689	167.401
765.38	168.269
766.072	134.18
766.764	154.178
767.455	131.22
768.147	101.419
768.839	116.494
769.53	126.531
770.222	118.518
770.914	111.309
771.605	146.138
772.297	171.089
772.989	135.368
773.68	93.3157
774.372	96.7168
775.064	112.286
775.755	121.305
776.447	137.847
777.139	105.153
777.83	140.649
778.522	131.343
779.214	113.008
779.905	134.139
780.597	182.303
781.289	138.363
781.98	110.364
782.672	79.3371
783.364	147.493
784.055	138.65
784.747	116.133
785.439	128.507
786.13	148.946
786.822	148.768
787.514	122.56
788.205	118.234
788.897	136.458
789.589	127.625
790.28	139.706
790.972	125.669
791.664	139.966
792.355	154.824
793.047	79.2939
793.739	100.56
794.43	92.9214
795.122	151.016
795.814	74.4497
796.505	139.994
797.197	147.793
797.889	129.12
798.58	142.481
799.272	146.754
799.964	128.613
800.655	104.036
801.347	99.4812
802.039	114.904
802.73	103.349
803.422	56.6375
804.114	85.3456
804.805	119.358
805.497	167.235
806.189	130.184
806.88	87.1643
807.572	87.7035
808.264	161.757
808.955	93.9656
809.647	108.307
810.339	94.7303
811.03	74.5441
811.722	130.953
812.414	133.888
813.105	126.233
813.797	119.487
814.489	111.422
815.18	100.264
815.872	98.2374
816.564	115.009
817.255	93.7254
817.947	104.651
818.638	125.572
819.33	109.995
820.022	99.8915
820.713	89.3958
821.405	75.2721
822.097	123.62
822.789	160.533
823.48	117.763
824.172	65.9886
824.863	108.733
825.555	109.306
826.247	111.097
826.938	109.4
827.63	102.204
828.322	156.118
829.013	166.487
829.705	117.867
830.397	113.902
831.088	120.315
831.78	115.54
832.472	106.559
833.163	109.013
833.855	128.373
834.547	127.205
835.238	135.779
835.93	124.524
836.622	134.141
837.313	119.141
838.005	101.36
838.697	121.267
839.388	111.74
840.08	122.692
840.772	113.16
841.463	101.955
842.155	108.696
842.847	154.875
843.538	106.919
844.23	137.397
844.922	133.253
845.613	128.225
846.305	126.698
846.997	140.81
847.688	111.886
848.38	119.583
849.072	123.61
849.763	141.718
850.455	88.5386
851.147	74.0052
851.838	113.347
852.53	110.756
853.222	103.954
853.913	106.937
854.605	111.626
855.297	92.6595
855.988	93.3166
856.68	112.176
857.372	104.501
858.063	115.774
858.755	140.931
859.447	130.427
860.138	74.7639
860.83	106.256
861.522	108.395
862.213	108.162
862.905	130.784
863.597	141.709
864.288	134.169
864.98	131.042
865.672	95.5467
866.363	127.531
867.055	141.301
867.747	120.302
868.438	126.761
869.13	131.341
869.822	129.231
870.513	135.814
871.205	144.392
871.897	103.262
872.588	99.554
873.28	113.309
873.972	137.255
874.663	130.029
875.355	136.324
876.047	133.529
876.738	139.287
877.43	80.1897
878.122	125.214
878.813	59.4351
879.505	70.0408
880.197	115.592
880.888	98.991
881.58	110.687
882.272	122.48
882.963	117.321
883.655	100.182
884.347	121.127
885.038	153.391
885.73	112.61
886.422	96.4982
887.113	136.224
887.805	107.736
888.497	80.7512
889.188	86.1118
889.88	135.251
890.572	83.8755
891.263	130.629
891.955	124.173
892.647	123.368
893.338	148.609
894.03	97.3057
894.721	92.3454
895.413	146.83
896.105	132.776
896.797	121.275
897.488	90.5248
898.18	95.7868
898.872	89.2906
899.563	118.328
900.255	98.9611
900.946	107.964
901.638	107.956
902.33	129.404
903.021	148.879
903.713	106.896
904.405	98.9064
905.096	106.326
905.788	84.9574
906.48	112.294
907.171	111.821
907.863	84.343
908.555	110.148
909.246	107.559
909.938	133.245
910.63	137.115
911.321	92.7106
912.013	131.973
912.705	111.137
913.396	108.902
914.088	84.9797
914.78	114.65
915.471	115.11
916.163	78.373
916.855	79.7831
917.546	98.8156
918.238	154.002
918.93	117.801
919.621	151.515
920.313	134.576
921.005	86.5352
921.696	91.167
922.388	144.228
923.08	149.39
923.771	107.657
924.463	121.274
925.155	114.484
925.846	83.4897
926.538	103.421
927.23	112.955
927.921	103.706
928.613	101.428
929.305	101.014
929.996	100.301
930.688	106.55
931.38	122.531
932.071	112.299
932.763	140.217
933.455	114.621
934.146	99.8404
934.838	77.7958
935.53	128.439
936.221	116.044
936.913	41.7603
937.605	83.8181
938.296	102.755
938.988	120.701
939.68	105.359
940.371	104.189
941.063	154.842
941.755	101.301
942.446	93.8493
943.138	100.047
943.83	86.6631
944.521	74.8134
945.213	86.0844
945.905	58.0649
946.596	67.1302
947.288	102.996
947.98	99.1154
948.671	106.013
949.363	109.907
950.055	75.018
950.746	82.6778
951.438	105.245
952.13	87.5215
952.821	110.132
953.513	132.761
954.205	135.589
954.896	125.507
955.588	78.7131
956.28	124.349
956.971	119.059
957.663	115.557
958.355	153.297
959.046	142.14
959.738	159.726
960.43	143.828
961.121	135.574
961.813	176.495
962.505	180.19
963.196	136.544
963.888	178.383
964.58	143.826
965.271	146.179
965.963	105.039
966.655	135.595
967.346	169.15
968.038	136.849
968.73	119.21
969.421	126.287
970.113	112.727
970.804	97.2354
971.496	118.324
972.188	93.3379
972.88	40.0749
973.571	44.1698
974.263	62.3514
974.954	79.8738
975.646	81.214
976.338	85.9858
977.029	91.9799
977.721	61.9241
978.413	66.1056
979.104	95.4199
979.796	96.6885
980.488	81.473
981.179	67.7942
981.871	79.8808
982.563	67.9307
983.254	65.7061
983.946	41.9576
984.638	47.1114
985.329	46.9363
986.021	68.8264
986.713	91.8024
987.404	65.693
988.096	102.956
988.788	136.116
989.479	86.2301
990.171	118.751
990.863	80.3735
991.554	77.2803
992.246	93.3922
992.938	73.1925
993.629	82.8932
994.321	70.0729
995.013	82.7284
995.704	74.9879
996.396	98.3767
997.088	48.4973
997.779	57.515
998.471	71.2253
999.163	82.3948
999.854	44.6185
1000.55	72.6463
1001.24	65.8508
1001.93	70.5233
1002.62	81.7555
1003.31	55.2638
1004	60.6983
1004.7	61.1928
1005.39	72.3765
1006.08	79.412
1006.77	104.269
1007.46	65.2437
1008.15	50.924
1008.85	37.1266
1009.54	58.3849
1010.23	102.776
1010.92	111.664
1011.61	106.628
1012.3	100.408
1013	72.7584
1013.69	33.5899
1014.38	68.1229
1015.07	92.6305
1015.76	77.882
1016.45	56.7542
1017.15	32.6108
1017.84	21.5831
1018.53	37.6713
1019.22	81.2405
1019.91	84.1467
1020.6	58.8616
1021.3	61.8967
1021.99	64.4585
1022.68	35.2045
1023.37	38.4818
1024.06	60.4788
1024.75	73.5516
1025.45	96.058
1026.14	100.443
1026.83	95.8742
1027.52	66.1459
1028.21	97.4235
1028.9	74.0547
1029.6	52.2949
1030.29	51.255
1030.98	70.3386
1031.67	60.2642
1032.36	55.2159
1033.05	43.4516
1033.75	71.8019
1034.44	102.435
1035.13	66.2363
1035.82	87.7311
1036.51	91.2666
1037.2	93.9371
1037.9	74.4223
1038.59	56.7325
1039.28	49.0989
1039.97	59.6093
1040.66	65.994
1041.35	87.5839
1042.05	114.257
1042.74	94.8321
1043.43	111.864
1044.12	44.2036
1044.81	107.536
1045.5	79.1807
1046.2	67.6774
1046.89	99.5903
1047.58	84.0628
1048.27	115.38
1048.96	123.967
1049.65	53.0615
1050.35	83.9368
1051.04	89.4642
1051.73	67.299
1052.42	67.9056
1053.11	69.1403
1053.8	94.091
1054.5	79.308
1055.19	95.7447
1055.88	101.498
1056.57	101.195
1057.26	113.607
1057.95	139.035
1058.65	87.1639
1059.34	84.863
1060.03	94.5462
1060.72	102.994
1061.41	154.045
1062.1	140.14
1062.8	124.981
1063.49	133.71
1064.18	136.177
1064.87	151.843
1065.56	141.823
1066.25	129.131
1066.95	117.393
1067.64	125.463
1068.33	156.78
1069.02	165.365
1069.71	157.969
1070.4	159.864
1071.1	182.762
1071.79	156.392
1072.48	184.021
1073.17	186.726
1073.86	184.049
1074.55	246.593
1075.25	203.112
1075.94	200.304
1076.63	252.882
1077.32	191.534
1078.01	204.811
1078.7	228.368
1079.4	220.847
1080.09	211.189
1080.78	199.1
1081.47	198.36
1082.16	169.407
1082.85	185.222
1083.55	163.884
1084.24	173.553
1084.93	191.887
1085.62	214.364
1086.31	229.194
1087	211.047
1087.7	169.304
1088.39	198.99
1089.08	221.315
1089.77	178.175
1090.46	184.911
1091.15	203.547
1091.85	217.597
1092.54	182.905
1093.23	183.442
1093.92	205.578
1094.61	198.668
1095.3	184.143
1096	205.92
1096.69	263.359
1097.38	236.485
1098.07	246.299
1098.76	237.347
1099.45	221.036
1100.15	222.373
1100.84	233.609
1101.53	190.574
1102.22	233.367
1102.91	238.815
1103.6	257.27
1104.3	287.162
1104.99	267.54
1105.68	269.556
1106.37	283.249
1107.06	286.055
1107.75	276.556
1108.45	260.841
1109.14	305.353
1109.83	299.207
1110.52	324.65
1111.21	263.209
1111.9	302.608
1112.6	347.427
1113.29	332.575
1113.98	340.845
1114.67	328.277
1115.36	332.408
1116.05	364.113
1116.75	350.938
1117.44	316.081
1118.13	354.033
1118.82	359.511
1119.51	344.38
1120.2	353.276
1120.9	367.014
1121.59	382.027
1122.28	395.755
1122.97	408.32
1123.66	375.867
1124.35	405.803
1125.05	401.53
1125.74	397.926
1126.43	418.434
1127.12	417.934
1127.81	384.618
1128.5	429.662
1129.2	400.211
1129.89	372.415
1130.58	458.318
1131.27	442.995
1131.96	425.893
1132.65	498.938
1133.35	485.776
1134.04	459.277
1134.73	489.644
1135.42	432.37
1136.11	451.315
1136.8	438.219
1137.5	482.697
1138.19	502.932
1138.88	471.994
1139.57	550.815
1140.26	519.522
1140.95	550.184
1141.65	520.512
1142.34	502.753
1143.03	545.143
1143.72	578.938
1144.41	578.426
1145.1	578.854
1145.8	559.09
1146.49	590.463
1147.18	555.533
1147.87	589.362
1148.56	656.225
1149.25	661.631
1149.95	646.513
1150.64	610.803
1151.33	678.392
1152.02	631.467
1152.71	671.111
1153.4	661.387
1154.1	678.569
1154.79	638.059
1155.48	724.316
1156.17	737.323
1156.86	753.677
1157.55	704.806
1158.25	706.868
1158.94	722.865
1159.63	784.378
1160.32	806.786
1161.01	833.022
1161.7	832.712
1162.4	855.894
1163.09	855.808
1163.78	823.761
1164.47	831.367
1165.16	889.7
1165.85	924.666
1166.55	933.645
1167.24	925.811
1167.93	955.276
1168.62	1010.66
1169.31	995.657
1170	993.328
1170.7	1037.08
1171.39	1055.77
1172.08	1073.89
1172.77	1113.79
1173.46	1132.82
1174.15	1145.23
1174.85	1134.7
1175.54	1177.16
1176.23	1214.77
1176.92	1264.28
1177.61	1304.04
1178.3	1330.92
1179	1327.28
1179.69	1390.96
1180.38	1372.06
1181.07	1418.81
1181.76	1502.91
1182.45	1507.79
1183.15	1521.13
1183.84	1561.9
1184.53	1655.51
1185.22	1628.44
1185.91	1730.49
1186.6	1736.62
1187.3	1751.83
1187.99	1818.45
1188.68	1917.88
1189.37	1864.72
1190.06	1948.37
1190.75	1981.92
1191.45	2035.2
1192.14	2090.82
1192.83	2236.86
1193.52	2266.02
1194.21	2236.07
1194.9	2308.72
1195.6	2359.12
1196.29	2338.31
1196.98	2399.51
1197.67	2525
1198.36	2544.91
1199.05	2518.55
1199.75	2635.52
1200.44	2696.61
1201.13	2747.51
1201.82	2763.35
1202.51	2770.78
1203.2	2742.75
1203.9	2818.79
1204.59	2873.09
1205.28	2821.68
1205.97	2876.83
1206.66	2828.26
1207.35	2858.45
1208.05	2942.12
1208.74	2899.75
1209.43	2906.57
1210.12	2904.97
1210.81	2890.47
1211.5	2897.33
1212.2	2792.67
1212.89	2810.88
1213.58	2763.97
1214.27	2789.4
1214.96	2826.9
1215.65	2750.19
1216.35	2666.82
1217.04	2695.79
1217.73	2654.86
1218.42	2629.53
1219.11	2695.47
1219.8	2631.33
1220.5	2635.78
1221.19	2636.84
1221.88	2597.55
1222.57	2534.7
1223.26	2587.23
1223.95	2479.16
1224.64	2508.62
1225.34	2448.5
1226.03	2456.04
1226.72	2415.32
1227.41	2438.2
1228.1	2412.64
1228.8	2388.79
1229.49	2291.08
1230.18	2267.66
1230.87	2283.62
1231.56	2305.09
1232.25	2316.21
1232.95	2330
1233.64	2303.92
1234.33	2228.31
1235.02	2200.73
1235.71	2182.57
1236.4	2229.43
1237.1	2248.26
1237.79	2256.47
1238.48	2204.38
1239.17	2171.1
1239.86	2225.96
1240.55	2189.45
1241.24	2105.99
1241.94	2130.86
1242.63	2138.57
1243.32	2137.44
1244.01	2102.78
1244.7	2132.8
1245.39	2120.44
1246.09	2087.2
1246.78	1949.45
1247.47	2066.44
1248.16	2106.73
1248.85	2076.92
1249.54	2051.11
1250.24	1984.27
1250.93	2018.93
1251.62	2016.59
1252.31	2050.36
1253	2057.96
1253.69	2001.98
1254.39	1949.94
1255.08	1982.87
1255.77	1996.78
1256.46	2001.76
1257.15	2039.88
1257.85	2093.49
1258.54	2038
1259.23	2028.69
1259.92	2068.21
1260.61	2082.01
1261.3	2101.65
1261.99	2107.09
1262.69	2094.82
1263.38	2148.09
1264.07	2197.23
1264.76	2258.72
1265.45	2138.04
1266.14	2295.23
1266.84	2226.5
1267.53	2313.72
1268.22	2321.79
1268.91	2401.96
1269.6	2327.08
1270.29	2401.2
1270.99	2391.66
1271.68	2448.51
1272.37	2481.73
1273.06	2538.83
1273.75	2524.3
1274.44	2519.61
1275.14	2548.17
1275.83	2546.22
1276.52	2585.35
1277.21	2651.3
1277.9	2662.24
1278.59	2703.36
1279.29	2785.49
1279.98	2812.84
1280.67	2822.87
1281.36	2838.24
1282.05	2844.82
1282.74	2898.18
1283.44	2880.98
1284.13	2933.76
1284.82	2950.43
1285.51	2917.04
1286.2	2919.94
1286.89	2978.23
1287.59	3037.16
1288.28	3018.55
1288.97	3035.73
1289.66	3079.48
1290.35	3132.6
1291.04	3106.11
1291.74	3053.47
1292.43	3037.43
1293.12	3034.38
1293.81	3054.93
1294.5	3058.86
1295.19	3026.52
1295.89	3063.88
1296.58	3048.68
1297.27	2988.14
1297.96	2996.79
1298.65	3005.67
1299.34	2940.64
1300.04	2914.06
1300.73	2921.25
1301.42	2905.02
1302.11	2819.61
1302.8	2891.37
1303.49	2907.29
1304.19	2749.64
1304.88	2824.23
1305.57	2744.47
1306.26	2718.24
1306.95	2786.05
1307.64	2730.06
1308.34	2693.88
1309.03	2734.37
1309.72	2654.18
1310.41	2651.07
1311.1	2663.81
1311.79	2655.12
1312.49	2622.81
1313.18	2549.96
1313.87	2526.76
1314.56	2580.64
1315.25	2558.99
1315.94	2487.47
1316.64	2494.94
1317.33	2466.79
1318.02	2520.28
1318.71	2491.14
1319.4	2469.04
1320.09	2474.1
1320.79	2399.45
1321.48	2413.73
1322.17	2256.6
1322.86	2390.77
1323.55	2375.05
1324.24	2363.22
1324.94	2405.74
1325.63	2386.05
1326.32	2413.91
1327.01	2333.53
1327.7	2346.2
1328.39	2386.54
1329.09	2393.86
1329.78	2309.12
1330.47	2276.06
1331.16	2315.51
1331.85	2346.14
1332.54	2284.92
1333.24	2275.93
1333.93	2245.56
1334.62	2284.28
1335.31	2295.47
1336	2266.47
1336.69	2130.89
1337.39	2136.5
1338.08	2209.84
1338.77	2143.28
1339.46	2096.15
1340.15	2062.91
1340.84	2061.24
1341.54	2064.61
1342.23	2031.6
1342.92	2002.15
1343.61	1969.56
1344.3	1973.52
1344.99	1972.15
1345.69	1922.65
1346.38	1913.42
1347.07	1891.43
1347.76	1905.88
1348.45	1798.23
1349.14	1816.44
1349.84	1780.79
1350.53	1735.21
1351.22	1660.9
1351.91	1693.63
1352.6	1737.94
1353.29	1647.07
1353.99	1617.88
1354.68	1595.08
1355.37	1557.19
1356.06	1574.2
1356.75	1562.46
1357.44	1502.81
1358.14	1462.26
1358.83	1459.14
1359.52	1430.02
1360.21	1443.65
1360.9	1419.72
1361.59	1415.91
1362.29	1414.18
1362.98	1399.34
1363.67	1340.65
1364.36	1326.3
1365.05	1331.54
1365.74	1379.39
1366.44	1268.27
1367.13	1244.62
1367.82	1297.16
1368.51	1268.18
1369.2	1287.67
1369.89	1279.42
1370.59	1244.63
1371.28	1274.8
1371.97	1248.87
1372.66	1212.37
1373.35	1220.3
1374.04	1246.88
1374.74	1195.49
1375.43	1212.17
1376.12	1204.47
1376.81	1187.47
1377.5	1212.93
1378.19	1178.22
1378.89	1199.88
1379.58	1229.3
1380.27	1230.15
1380.96	1212.17
1381.65	1234.89
1382.34	1270.08
1383.04	1235.89
1383.73	1213.29
1384.42	1217.06
1385.11	1211.58
1385.8	1216.18
1386.49	1239.48
1387.19	1240.88
1387.88	1257.97
1388.57	1268.6
1389.26	1287.08
1389.95	1262.45
1390.64	1306.88
1391.34	1252.49
1392.03	1269.52
1392.72	1281.23
1393.41	1354.07
1394.1	1334.2
1394.79	1332.35
1395.49	1366.12
1396.18	1327.02
1396.87	1385.27
1397.56	1368.93
1398.25	1431.76
1398.94	1373.33
1399.64	1476.86
1400.33	1421.59
1401.02	1501.74
1401.71	1484.56
1402.4	1471.4
1403.09	1485.6
1403.79	1512.03
1404.48	1535.07
1405.17	1523.85
1405.86	1530.44
1406.55	1529.99
1407.24	1563.41
1407.94	1603.38
1408.63	1565.47
1409.32	1558.81
1410.01	1600.09
1410.7	1598.72
1411.39	1629.11
1412.09	1639.59
1412.78	1661.31
1413.47	1642.68
1414.16	1637.04
1414.85	1667.43
1415.54	1677.73
1416.24	1702.62
1416.93	1707.25
1417.62	1684.11
1418.31	1689.22
1419	1679.03
1419.69	1713.04
1420.39	1742.49
1421.08	1680.65
1421.77	1671
1422.46	1776.82
1423.15	1736.09
1423.84	1694.11
1424.54	1699.64
1425.23	1721.75
1425.92	1725.72
1426.61	1738.59
1427.3	1734.91
1427.99	1695.5
1428.69	1700.41
1429.38	1707.22
1430.07	1664
1430.76	1694.61
1431.45	1720.7
1432.14	1729.18
1432.84	1721.29
1433.53	1699.22
1434.22	1692.75
1434.91	1674.9
1435.6	1641.47
1436.29	1627.25
1436.99	1669.4
1437.68	1678.07
1438.37	1626.1
1439.06	1607.16
1439.75	1628.46
1440.44	1629.74
1441.14	1554.7
1441.83	1572.53
1442.52	1548.18
1443.21	1556.29
1443.9	1520.24
1444.59	1457.5
1445.29	1389.28
1445.98	1388.27
1446.67	1403.63
1447.36	1355
1448.05	1350.6
1448.74	1358.42
1449.44	1293.47
1450.13	1316.08
1450.82	1349.2
1451.51	1340.24
1452.2	1311.24
1452.89	1271.43
1453.59	1276.5
1454.28	1279.22
1454.97	1247.45
1455.66	1289.83
1456.35	1338.61
1457.04	1281.55
1457.74	1293.42
1458.43	1274.6
1459.12	1284.46
1459.81	1269.29
1460.5	1230.02
1461.19	1261.55
1461.89	1253.7
1462.58	1281.61
1463.27	1254.81
1463.96	1271.62
1464.65	1286.65
1465.34	1256.74
1466.04	1253.9
1466.73	1256.2
1467.42	1229.28
1468.11	1279.26
1468.8	1275.21
1469.49	1281.25
1470.19	1269.35
1470.88	1263.27
1471.57	1258.89
1472.26	1183.84
1472.95	1235.56
1473.64	1267.36
1474.34	1287.61
1475.03	1265.79
1475.72	1250.57
1476.41	1229.19
1477.1	1236.47
1477.79	1295.15
1478.49	1273.98
1479.18	1262.15
1479.87	1254.5
1480.56	1261.92
1481.25	1299.59
1481.94	1287.85
1482.64	1251.06
[truncated: 748 more rows]

## Sheet: VTL3_784_pos1_round3
100	104.687
100.692	70.1295
101.383	98.6426
102.075	74.0072
102.767	100.488
103.458	110.954
104.15	52.8006
104.842	132.357
105.533	82.1391
106.225	56.6268
106.917	74.6253
107.608	70.5007
108.3	43.7731
108.992	101.444
109.683	96.3413
110.375	109.048
111.067	125.568
111.758	147.721
112.45	140.267
113.142	71.7238
113.833	67.8291
114.525	83.1892
115.217	80.442
115.908	96.5546
116.6	112.682
117.292	98.5722
117.983	75.61
118.675	105.062
119.367	111.565
120.058	116.863
120.75	138.644
121.442	154.325
122.133	112.387
122.825	81.4912
123.517	114.461
124.208	99.2287
124.9	86.5782
125.592	111.61
126.283	153.674
126.975	121.913
127.667	104.712
128.358	136.163
129.05	159.641
129.742	119.22
130.433	64.235
131.125	152.911
131.817	179.918
132.508	155.223
133.2	129.657
133.892	137.885
134.583	174.71
135.275	195.334
135.967	131.033
136.658	180.928
137.35	185
138.042	156.782
138.733	154.722
139.425	184.597
140.116	161.367
140.808	145.111
141.5	155.708
142.191	165.357
142.883	164.307
143.575	163.291
144.266	168.712
144.958	132.579
145.65	162.671
146.341	155.464
147.033	170.703
147.725	183.165
148.416	176.95
149.108	188.486
149.8	176.445
150.491	215.524
151.183	217.859
151.875	230.871
152.566	224.47
153.258	173.664
153.95	215.147
154.641	212.06
155.333	198.285
156.025	216.467
156.716	257.995
157.408	289.602
158.1	272.504
158.791	175.131
159.483	238.187
160.175	277.553
160.866	260.137
161.558	210.882
162.25	187.461
162.941	239.79
163.633	240.469
164.325	258.985
165.016	222.006
165.708	235.87
166.4	284.814
167.091	285.466
167.783	292.577
168.475	221.423
169.166	236.249
169.858	328.683
170.55	362.863
171.241	303.209
171.933	263.48
172.625	332.817
173.316	321.866
174.008	254.093
174.7	240.415
175.391	262.106
176.083	288.425
176.775	343.393
177.466	267.023
178.158	267.596
178.85	291.957
179.541	277.358
180.233	270.184
180.925	307.495
181.616	284.213
182.308	289.156
183	256.278
183.691	248.67
184.383	298.744
185.075	334.029
185.766	286.192
186.458	292.7
187.15	356.993
187.841	354.122
188.533	301.906
189.225	266.181
189.916	274.11
190.608	293.053
191.3	266.884
191.991	336.798
192.683	240.49
193.375	247.568
194.066	273.853
194.758	258.775
195.45	273.446
196.141	194.759
196.833	262.171
197.525	259.094
198.216	268.101
198.908	298.887
199.6	319.13
200.291	310.704
200.983	353.806
201.675	345.478
202.366	318.522
203.058	346.768
203.75	356.123
204.441	331.73
205.133	388.362
205.825	368.975
206.516	315.621
207.208	310.459
207.9	330.448
208.591	304.799
209.283	269.374
209.975	369.05
210.666	335.943
211.358	305.209
212.05	365.172
212.741	383.973
213.433	376.12
214.125	381.907
214.816	366.703
215.508	358.037
216.199	328.285
216.891	371.169
217.583	375.43
218.274	324.757
218.966	289.141
219.658	338.869
220.349	335.729
221.041	264.476
221.733	317.996
222.424	324.472
223.116	335.515
223.808	380.238
224.499	352.65
225.191	363.617
225.883	318.432
226.574	317.012
227.266	371.673
227.958	412.773
228.649	392.822
229.341	346.126
230.033	369.635
230.724	352.577
231.416	371.845
232.108	376.044
232.799	375.816
233.491	388.864
234.183	412.824
234.874	436.61
235.566	381.42
236.258	413.946
236.949	415.886
237.641	385.55
238.333	365.442
239.024	379.453
239.716	389.419
240.408	425.887
241.099	379.135
241.791	426.277
242.483	446.503
243.174	449.932
243.866	489.228
244.558	461.863
245.249	460.42
245.941	447.577
246.633	394.205
247.324	374.075
248.016	422.823
248.708	480.644
249.399	439.113
250.091	423.861
250.783	455.814
251.474	483.531
252.166	490.299
252.858	487.749
253.549	470.89
254.241	437.475
254.933	484.748
255.624	438.01
256.316	481.303
257.008	501.972
257.699	512.854
258.391	493.655
259.083	445.218
259.774	498.849
260.466	486.159
261.158	544.825
261.849	502.48
262.541	518.567
263.233	560.808
263.924	542.597
264.616	503.515
265.308	515.519
265.999	522.02
266.691	501.203
267.383	525.468
268.074	550.096
268.766	540.936
269.458	512.276
270.149	464.595
270.841	474.875
271.533	488.119
272.224	501.493
272.916	494.873
273.608	498.761
274.299	519.371
274.991	496.453
275.683	530.893
276.374	449.313
277.066	435.266
277.758	471.917
278.449	503.33
279.141	509.188
279.833	513.265
280.524	526.663
281.216	510.921
281.908	464.049
282.599	508.701
283.291	543.611
283.983	523.606
284.674	501.76
285.366	543.876
286.058	513.241
286.749	518.554
287.441	480.045
288.133	492.958
288.824	482.985
289.516	460.358
290.207	489.778
290.899	478.577
291.591	515.322
292.283	476.656
292.974	501.17
293.666	508.916
294.357	499.468
295.049	483.028
295.741	453.911
296.432	531.95
297.124	537.814
297.816	516.296
298.507	509.094
299.199	510.121
299.891	527.102
300.582	541.938
301.274	498.865
301.966	509.086
302.657	521.089
303.349	503.436
304.041	505.102
304.732	503.023
305.424	482.814
306.116	461.324
306.807	457.373
307.499	484.656
308.191	470.038
308.882	457.202
309.574	476.62
310.266	473.091
310.957	427.868
311.649	399.504
312.341	440.33
313.032	488.962
313.724	470.438
314.416	454.577
315.107	456.748
315.799	436.228
316.491	403.219
317.182	410.183
317.874	371.747
318.566	420.035
319.257	436.211
319.949	405.508
320.641	383.046
321.332	395.08
322.024	422.613
322.716	430.469
323.407	422.695
324.099	474.905
324.791	357.138
325.482	411.897
326.174	439.61
326.866	384.98
327.557	361.665
328.249	421.655
328.941	347.162
329.632	381.915
330.324	390.89
331.016	346.657
331.707	330.648
332.399	342.151
333.091	359.21
333.782	392.88
334.474	355.979
335.166	375.871
335.857	398.92
336.549	380.419
337.241	350.639
337.932	337.446
338.624	354.885
339.316	392.232
340.007	374.258
340.699	383.754
341.391	361.06
342.082	380.647
342.774	371.188
343.466	355.324
344.157	367.109
344.849	373.932
345.541	353.962
346.232	341.915
346.924	356.81
347.616	398.716
348.307	385.907
348.999	375.229
349.691	372.248
350.382	329.18
351.074	380.844
351.766	403.055
352.457	408.911
353.149	370.055
353.841	371.401
354.532	379.647
355.224	357.693
355.916	343.251
356.607	399.95
357.299	368.045
357.991	358.638
358.682	380.986
359.374	373.176
360.066	403.124
360.757	433.956
361.449	395.248
362.14	353.861
362.832	429.865
363.524	344.651
364.216	380.714
364.907	376.03
365.599	389.785
366.291	419.144
366.982	412.724
367.674	376.601
368.365	408.939
369.057	380.984
369.749	378.945
370.44	401.989
371.132	455.349
371.824	464.467
372.515	414.704
373.207	380.39
373.899	417.918
374.59	450.787
375.282	418.556
375.974	451.062
376.665	450.079
377.357	458.935
378.049	462.118
378.74	446.954
379.432	469.742
380.124	510.484
380.815	481.091
381.507	485.905
382.199	476.883
382.89	444.459
383.582	461.978
384.274	492.065
384.965	482.463
385.657	564.789
386.349	610.089
387.04	495.862
387.732	550.132
388.424	510.991
389.115	509.259
389.807	543.623
390.499	556.725
391.19	554.628
391.882	464.424
392.574	508.882
393.265	509.34
393.957	509.75
394.649	492.517
395.34	502.205
396.032	500.353
396.724	468.132
397.415	495.726
398.107	486.702
398.799	452.897
399.49	441.715
400.182	488.686
400.874	504.46
401.565	468.404
402.257	440.357
402.949	449.625
403.64	421.952
404.332	419.11
405.024	382.098
405.715	376.736
406.407	407.059
407.099	439.555
407.79	425.801
408.482	403.191
409.174	414.841
409.865	352.078
410.557	374.464
411.249	421.6
411.94	369.285
412.632	365.991
413.324	346.633
414.015	337.912
414.707	343.77
415.399	312.567
416.09	333.506
416.782	386.118
417.474	380.472
418.165	360.381
418.857	358.719
419.549	366.952
420.24	346.586
420.932	341.618
421.624	398.804
422.315	351.659
423.007	356.686
423.699	335.036
424.39	352.439
425.082	373.901
425.774	390.367
426.465	406.221
427.157	399.817
427.849	366.223
428.54	386.518
429.232	350.202
429.924	366.785
430.615	381.251
431.307	383.098
431.999	369.443
432.69	346.508
433.382	342.751
434.074	361.01
434.765	346.331
435.457	422.067
436.149	349.076
436.84	392.77
437.532	363.296
438.224	358.915
438.915	355.278
439.607	309.151
440.298	269.332
440.99	302.066
441.682	312.657
442.373	260.196
443.065	345.101
443.757	320.985
444.448	317.186
445.14	312.962
445.832	311.246
446.523	330.609
447.215	325.464
447.907	319.939
448.598	356.378
449.29	259.878
449.982	331.462
450.673	301.081
451.365	280.845
452.057	290.63
452.748	301.972
453.44	334.356
454.132	334.383
454.823	314.04
455.515	311.129
456.207	320.004
456.898	327.745
457.59	339.841
458.282	352.394
458.973	361.003
459.665	348.539
460.357	306.423
461.048	321.692
461.74	277.556
462.432	310.224
463.123	282.653
463.815	277.592
464.507	309.242
465.198	319.915
465.89	315.696
466.582	333.946
467.273	299.791
467.965	287.228
468.657	291.473
469.348	324.455
470.04	306.296
470.732	313.915
471.423	319.192
472.115	334.753
472.807	346.367
473.498	300.973
474.19	330.374
474.882	348.466
475.573	291.265
476.265	271.463
476.957	301.566
477.648	338.762
478.34	338.209
479.032	311.198
479.723	299.891
480.415	319.832
481.107	359.139
481.798	315.633
482.49	344.388
483.182	339.088
483.873	375.2
484.565	361.132
485.257	326.393
485.948	311.711
486.64	315.21
487.332	335.297
488.023	282.069
488.715	296.107
489.407	280.02
490.098	280.14
490.79	291.709
491.482	286.847
492.173	285.896
492.865	312.098
493.557	325.77
494.248	285.226
494.94	323.712
495.632	240.057
496.323	272.455
497.015	283.635
497.707	335.173
498.398	304.936
499.09	246.283
499.782	234.133
500.473	254.797
501.165	283.155
501.857	319.639
502.548	317.461
503.24	267.955
503.932	293.983
504.623	275.897
505.315	219.498
506.007	222.248
506.698	259.385
507.39	284.464
508.082	312.346
508.773	239.394
509.465	254.955
510.157	278.564
510.848	264.654
511.54	275.173
512.232	256.453
512.923	251.623
513.615	253.14
514.307	234.741
514.998	221.192
515.69	236.049
516.382	249.376
517.073	246.78
517.765	290.419
518.456	265.511
519.148	223.226
519.84	234.735
520.531	220.758
521.223	190.12
521.915	210.477
522.607	222.354
523.298	195.455
523.99	230.736
524.681	181.057
525.373	217.868
526.065	244.848
526.756	244.84
527.448	242.414
528.14	237.814
528.831	248.568
529.523	285.402
530.215	287.79
530.906	273.147
531.598	174.869
532.29	253.09
532.981	283.931
533.673	258.301
534.365	259.676
535.056	245.278
535.748	199.679
536.44	184.746
537.131	218.905
537.823	222.44
538.515	221.652
539.206	202.677
539.898	232.28
540.59	234.342
541.281	265.243
541.973	257.849
542.665	237.007
543.356	217.826
544.048	216.977
544.74	263.322
545.431	263.596
546.123	255.868
546.815	223.255
547.506	251.706
548.198	256.927
548.89	230.723
549.581	225.124
550.273	213.426
550.965	216.694
551.656	230.781
552.348	207.03
553.04	245.728
553.731	237.001
554.423	243.977
555.115	221.436
555.806	267.579
556.498	228.148
557.19	200.68
557.881	209.664
558.573	227.651
559.265	239.253
559.956	246.489
560.648	249.122
561.34	189.065
562.031	223.4
562.723	158.56
563.415	194.843
564.106	178.841
564.798	199.042
565.49	211.994
566.181	194.152
566.873	197.828
567.565	225.197
568.256	196.949
568.948	166.444
569.64	258.916
570.331	244.381
571.023	211.725
571.715	211.825
572.406	216.914
573.098	219.091
573.79	208.948
574.481	170.006
575.173	147.963
575.865	184.743
576.556	180.152
577.248	206.135
577.94	144.943
578.631	173.451
579.323	241.215
580.015	209.771
580.706	184.44
581.398	167.364
582.09	168.489
582.781	192.202
583.473	212.705
584.165	207.251
584.856	160.868
585.548	206.106
586.24	183.794
586.931	157.871
587.623	206.145
588.315	180.736
589.006	177.539
589.698	166.105
590.39	180.551
591.081	178.224
591.773	136.634
592.464	194.828
593.156	181.537
593.848	185.108
594.539	237.937
595.231	184.657
595.923	165.517
596.615	175.37
597.306	215.98
597.998	218.17
598.689	188.652
599.381	183.984
600.073	199.942
600.764	177.119
601.456	121.252
602.148	168.761
602.839	164.216
603.531	169.435
604.223	189.873
604.914	196.495
605.606	170.16
606.298	161.168
606.989	169.895
607.681	152.445
608.373	145.737
609.064	199.726
609.756	193.219
610.448	168.049
611.139	134.584
611.831	180.998
612.523	188.437
613.214	164.026
613.906	211.967
614.598	229.168
615.289	195.575
615.981	171.576
616.673	174.734
617.364	186.272
618.056	198.074
618.748	160.399
619.439	188.875
620.131	138.724
620.823	182.371
621.514	169.758
622.206	184.991
622.898	163.596
623.589	151.455
624.281	144.898
624.973	169.194
625.664	190.844
626.356	143.488
627.048	148.578
627.739	189.955
628.431	177.191
629.123	118.532
629.814	179.908
630.506	180.426
631.198	167.089
631.889	184.89
632.581	195.454
633.273	201.852
633.964	197.057
634.656	183.518
635.348	193.256
636.039	198.751
636.731	186.346
637.423	162.221
638.114	168.704
638.806	180.125
639.498	173.772
640.189	124.523
640.881	134.675
641.573	165.574
642.264	171.152
642.956	171.383
643.648	167.64
644.339	144.996
645.031	139.973
645.723	142.509
646.414	180.502
647.106	150.356
647.798	142.316
648.489	184.959
649.181	133.844
649.873	112.576
650.564	129.701
651.256	154.207
651.948	139.196
652.639	139.696
653.331	170.231
654.023	146.222
654.714	153.767
655.406	161.718
656.098	183.669
656.789	185.924
657.481	140.523
658.173	173.967
658.864	182.546
659.556	179.458
660.248	174.681
660.939	145.381
661.631	137.606
662.323	166.368
663.014	160.062
663.706	117.939
664.398	128.227
665.089	113.47
665.781	198.745
666.473	150.835
667.164	150.205
667.856	149.077
668.547	131.534
669.239	147.865
669.931	121.188
670.622	135.509
671.314	156.742
672.006	135.303
672.698	124.288
673.389	120.764
674.081	108.434
674.772	140.406
675.464	147.894
676.156	172.579
676.847	145.693
677.539	156.039
678.231	156.104
678.922	133.233
679.614	118.476
680.306	143.492
680.997	130.373
681.689	110.262
682.381	141.589
683.072	153.018
683.764	141.103
684.456	175.218
685.147	132.589
685.839	124.092
686.531	201.001
687.222	122.67
687.914	140.448
688.606	132.857
689.297	142.859
689.989	168.9
690.681	152.807
691.372	144.636
692.064	139.468
692.756	117.301
693.447	124.122
694.139	122.339
694.831	146.832
695.522	149.286
696.214	133.262
696.906	182.167
697.597	180.719
698.289	116.112
698.981	93.6036
699.672	82.6383
700.364	106.624
701.056	129.074
701.747	139.995
702.439	127.546
703.131	96.0254
703.822	92.6715
704.514	118.153
705.206	126.273
705.897	117.893
706.589	139.266
707.281	151.901
707.972	144.617
708.664	132.281
709.356	101.646
710.047	94.9832
710.739	115.282
711.431	129.973
712.122	123.818
712.814	122.013
713.506	116.983
714.197	86.6702
714.889	65.9048
715.581	77.2215
716.272	82.2592
716.964	124.226
717.656	115.804
718.347	100.722
719.039	134.347
719.731	86.6874
720.422	107.631
721.114	120.665
721.806	110.49
722.497	126.796
723.189	124.684
723.881	116.954
724.572	108.167
725.264	110.132
725.956	151.232
726.647	147.348
727.339	107.504
728.031	107.799
728.722	94.168
729.414	107.719
730.106	112.744
730.797	96.142
731.489	126.041
732.181	144.684
732.872	113.682
733.564	106.554
734.256	102.278
734.947	103.806
735.639	99.534
736.331	92.3708
737.022	92.669
737.714	82.9442
738.406	89.4298
739.097	94.7553
739.789	138.639
740.481	104.031
741.172	110.103
741.864	110.003
742.556	93.9623
743.247	131.054
743.939	125.715
744.63	89.1287
745.322	100.819
746.014	113.223
746.706	106.53
747.397	87.1406
748.089	78.0355
748.781	65.748
749.472	47.7607
750.164	94.6537
750.855	129.379
751.547	138.336
752.239	109.602
752.93	70.5802
753.622	79.3816
754.314	110.772
755.005	96.9412
755.697	94.7111
756.389	96.9615
757.08	101.073
757.772	83.1701
758.464	74.9514
759.155	78.5576
759.847	93.2282
760.539	104.263
761.23	99.1147
761.922	93.9536
762.614	82.0802
763.305	80.6836
763.997	105.677
764.689	62.3907
765.38	109.805
766.072	103.464
766.764	68.6291
767.455	93.1314
768.147	88.6346
768.839	82.2207
769.53	83.3194
770.222	98.2492
770.914	79.7061
771.605	75.1924
772.297	96.557
772.989	94.1232
773.68	68.7789
774.372	71.8868
775.064	103.569
775.755	113.004
776.447	107.305
777.139	88.6412
777.83	79.2792
778.522	109.775
779.214	115.732
779.905	91.7177
780.597	95.3901
781.289	90.8762
781.98	100.782
782.672	114.659
783.364	68.6673
784.055	75.3409
784.747	81.2908
785.439	73.9742
786.13	66.3167
786.822	67.0108
787.514	72.0508
788.205	65.0241
788.897	82.3442
789.589	95.0438
790.28	72.755
790.972	108.087
791.664	46.377
792.355	71.2037
793.047	79.5996
793.739	93.6347
794.43	93.4815
795.122	49.8827
795.814	55.4432
796.505	57.385
797.197	62.2811
797.889	79.1831
798.58	73.042
799.272	72.7038
799.964	90.7644
800.655	105.276
801.347	90.4201
802.039	60.9621
802.73	64.9734
803.422	63.6236
804.114	66.8354
804.805	86.8054
805.497	74.473
806.189	76.1334
806.88	51.8751
807.572	55.9383
808.264	74.9664
808.955	67.1291
809.647	105.6
810.339	103.473
811.03	99.6563
811.722	86.1069
812.414	75.8459
813.105	75.95
813.797	78.3226
814.489	89.8298
815.18	66.8033
815.872	82.0027
816.564	90.5767
817.255	67.8186
817.947	60.5532
818.638	91.5827
819.33	88.6683
820.022	83.8194
820.713	63.8224
821.405	67.7355
822.097	53.3304
822.789	82.0478
823.48	66.7325
824.172	85.0436
824.863	64.2465
825.555	83.679
826.247	76.7009
826.938	91.3389
827.63	72.6398
828.322	64.5615
829.013	66.2044
829.705	65.0024
830.397	63.7047
831.088	78.8114
831.78	80.3261
832.472	87.3484
833.163	77.6373
833.855	54.2261
834.547	67.556
835.238	69.834
835.93	80.5959
836.622	63.8339
837.313	80.8538
838.005	63.8429
838.697	62.4007
839.388	81.1384
840.08	70.42
840.772	71.2826
841.463	68.1063
842.155	61.7742
842.847	76.0725
843.538	53.7662
844.23	90.153
844.922	73.7587
845.613	67.2225
846.305	76.1163
846.997	100.461
847.688	87.2624
848.38	56.7118
849.072	60.3829
849.763	80.1654
850.455	74.1401
851.147	63.141
851.838	48.4109
852.53	41.9258
853.222	70.7865
853.913	72.265
854.605	79.18
855.297	54.0339
855.988	50.184
856.68	84.0855
857.372	58.377
858.063	87.4436
858.755	91.3047
859.447	54.9823
860.138	80.8387
860.83	66.0427
861.522	54.2765
862.213	77.5546
862.905	53.9086
863.597	75.7965
864.288	93.3975
864.98	94.8212
865.672	96.843
866.363	73.1328
867.055	58.4388
867.747	77.8897
868.438	95.9632
869.13	95.6656
869.822	79.0566
870.513	74.7166
871.205	98.2081
871.897	64.4963
872.588	51.2367
873.28	61.4121
873.972	74.5401
874.663	79.6245
875.355	71.9424
876.047	88.3113
876.738	76.5338
877.43	73.0841
878.122	62.3894
878.813	80.3416
879.505	73.0355
880.197	75.6889
880.888	33.8661
881.58	30.2268
882.272	49.5595
882.963	75.5093
883.655	96.4823
884.347	108.043
885.038	83.1098
885.73	53.2131
886.422	67.15
887.113	93.0109
887.805	113.896
888.497	120.53
889.188	86.9212
889.88	80.0369
890.572	45.0366
891.263	101.505
891.955	111.587
892.647	56.4836
893.338	67.7252
894.03	68.6655
894.721	-1.97489
895.413	74.5255
896.105	87.5758
896.797	66.81
897.488	80.0697
898.18	92.2824
898.872	98.8885
899.563	82.1746
900.255	81.452
900.946	76.0354
901.638	61.3688
902.33	77.178
903.021	81.2357
903.713	34.8067
904.405	26.0078
905.096	64.1882
905.788	45.4548
906.48	31.0845
907.171	78.3646
907.863	79.226
908.555	81.701
909.246	61.2006
909.938	77.809
910.63	79.356
911.321	102
912.013	54.1002
912.705	60.0828
913.396	90.6519
914.088	36.8429
914.78	98.4281
915.471	97.7319
916.163	111.441
916.855	67.2574
917.546	75.0707
918.238	68.4152
918.93	73.5059
919.621	45.9902
920.313	61.4437
921.005	76.6126
921.696	71.2809
922.388	84.127
923.08	86.7812
923.771	86.9687
924.463	79.6418
925.155	71.9593
925.846	83.2861
926.538	76.2636
927.23	57.9017
927.921	73.8321
928.613	96.6117
929.305	84.0466
929.996	46.4298
930.688	77.0056
931.38	87.3782
932.071	70.3342
932.763	92.641
933.455	87.8484
934.146	47.2741
934.838	79.9938
935.53	91.9863
936.221	17.2281
936.913	29.5137
937.605	69.2443
938.296	55.0739
938.988	49.5744
939.68	76.4029
940.371	90.1315
941.063	80.5543
941.755	109.061
942.446	75.3336
943.138	97.0643
943.83	83.0477
944.521	71.2294
945.213	67.9525
945.905	82.8289
946.596	86.0882
947.288	93.2674
947.98	95.6937
948.671	96.5675
949.363	87.2382
950.055	80.7153
950.746	102.423
951.438	109.307
952.13	80.6884
952.821	73.0879
953.513	109.888
954.205	115.848
954.896	125.313
955.588	128.918
956.28	133.269
956.971	107.688
957.663	87.0976
958.355	118.219
959.046	175.966
959.738	139.261
960.43	143.297
961.121	182.783
961.813	194.544
962.505	149.44
963.196	121.262
963.888	169.94
964.58	154.28
965.271	119.394
965.963	192.42
966.655	161.666
967.346	111.31
968.038	120.789
968.73	121.605
969.421	153.372
970.113	143.886
970.804	90.6949
971.496	89.8169
972.188	110.857
972.88	121.099
973.571	135.838
974.263	121.651
974.954	106.818
975.646	97.0454
976.338	108.408
977.029	114.142
977.721	93.0456
978.413	92.4874
979.104	82.9613
979.796	70.7862
980.488	97.2275
981.179	94.9248
981.871	79.1498
982.563	92.5339
983.254	101.128
983.946	111.955
984.638	109.579
985.329	82.8022
986.021	94.0932
986.713	101.46
987.404	88.2739
988.096	78.7575
988.788	91.5567
989.479	96.0861
990.171	60.4809
990.863	94.435
991.554	98.3838
992.246	86.18
992.938	126.033
993.629	92.403
994.321	91.6365
995.013	126.397
995.704	99.9927
996.396	105.217
997.088	96.8388
997.779	124.692
998.471	82.8836
999.163	72.8737
999.854	109.467
1000.55	118.701
1001.24	102.864
1001.93	87.9329
1002.62	86.4305
1003.31	85.8877
1004	74.4153
1004.7	103.555
1005.39	77.0439
1006.08	102.418
1006.77	108.184
1007.46	108.663
1008.15	96.1718
1008.85	79.7666
1009.54	88.9473
1010.23	105.717
1010.92	87.6756
1011.61	88.7885
1012.3	91.846
1013	90.7035
1013.69	139.462
1014.38	122.522
1015.07	122.659
1015.76	142.082
1016.45	117.267
1017.15	119.454
1017.84	122.297
1018.53	112.685
1019.22	108.314
1019.91	107.198
1020.6	133.758
1021.3	159.071
1021.99	136.446
1022.68	126.203
1023.37	123.601
1024.06	105.196
1024.75	111.856
1025.45	130.177
1026.14	121.128
1026.83	93.1799
1027.52	98.0712
1028.21	109.22
1028.9	115.93
1029.6	142.54
1030.29	122.718
1030.98	135.067
1031.67	126.053
1032.36	143.332
1033.05	116.779
1033.75	104.24
1034.44	88.9346
1035.13	135.113
1035.82	130.731
1036.51	120.188
1037.2	123.19
1037.9	142.847
1038.59	141.501
1039.28	128.386
1039.97	141.049
1040.66	132.849
1041.35	139.944
1042.05	173.757
1042.74	197.389
1043.43	148.212
1044.12	161.621
1044.81	146.834
1045.5	172.593
1046.2	131.391
1046.89	156.708
1047.58	147.45
1048.27	141.481
1048.96	99.1419
1049.65	157.653
1050.35	153.757
1051.04	141.172
1051.73	179.983
1052.42	148.067
1053.11	152.972
1053.8	164.145
1054.5	183.763
1055.19	174.847
1055.88	168.768
1056.57	158.896
1057.26	124.295
1057.95	150.784
1058.65	167.423
1059.34	171.458
1060.03	167.567
1060.72	182.547
1061.41	165.172
1062.1	162.646
1062.8	190.75
1063.49	172.085
1064.18	172.275
1064.87	203.181
1065.56	196.637
1066.25	201.129
1066.95	180.265
1067.64	186.432
1068.33	200.591
1069.02	219.636
1069.71	206.523
1070.4	222.12
1071.1	240.037
1071.79	223.267
1072.48	227.805
1073.17	225.049
1073.86	246.544
1074.55	251.518
1075.25	258.878
1075.94	257.187
1076.63	263.452
1077.32	257.296
1078.01	272.932
1078.7	266.844
1079.4	252.309
1080.09	232.668
1080.78	249.88
1081.47	283.63
1082.16	259.651
1082.85	236.259
1083.55	223.93
1084.24	248.572
1084.93	236.511
1085.62	260.631
1086.31	248.238
1087	264.626
1087.7	262.566
1088.39	281.568
1089.08	267.63
1089.77	254.464
1090.46	247.844
1091.15	291.736
1091.85	297.746
1092.54	259.747
1093.23	285.503
1093.92	279.934
1094.61	246.644
1095.3	284.12
1096	269.156
1096.69	284.169
1097.38	281.351
1098.07	282.433
1098.76	288.679
1099.45	292.098
1100.15	296.859
1100.84	303.769
1101.53	336.211
1102.22	335.171
1102.91	289.78
1103.6	309.764
1104.3	330.681
1104.99	336.933
1105.68	329.97
1106.37	360.953
1107.06	331.812
1107.75	359.042
1108.45	351.919
1109.14	326.693
1109.83	349.905
1110.52	357.514
1111.21	329.688
1111.9	346.106
1112.6	350.38
1113.29	342.947
1113.98	356.602
1114.67	377.923
1115.36	385.618
1116.05	347.266
1116.75	367.021
1117.44	409.495
1118.13	411.693
1118.82	410.141
1119.51	421.774
1120.2	419.865
1120.9	414.204
1121.59	433.434
1122.28	419.637
1122.97	415.531
1123.66	457.418
1124.35	442.126
1125.05	439.518
1125.74	408.916
1126.43	453.728
1127.12	433.026
1127.81	478.529
1128.5	411.487
1129.2	474.165
1129.89	438.408
1130.58	488.003
1131.27	500.819
1131.96	479.67
1132.65	460.485
1133.35	474.109
1134.04	509.297
1134.73	558.283
1135.42	480.24
1136.11	531.071
1136.8	531.699
1137.5	502.425
1138.19	546.085
1138.88	573.168
1139.57	506.569
1140.26	551.843
1140.95	549.401
1141.65	555.819
1142.34	559.737
1143.03	590.476
1143.72	607.193
1144.41	573.441
1145.1	583.935
1145.8	626.653
1146.49	541.62
1147.18	611.867
1147.87	602.081
1148.56	649.457
1149.25	606.955
1149.95	637.91
1150.64	619.02
1151.33	635.728
1152.02	647.165
1152.71	639.567
1153.4	657.398
1154.1	653.312
1154.79	684.87
1155.48	700.439
1156.17	702.987
1156.86	721.355
1157.55	709.907
1158.25	685.164
1158.94	723.339
1159.63	748.028
1160.32	693.616
1161.01	721.749
1161.7	723.203
1162.4	760.385
1163.09	805.529
1163.78	775.948
1164.47	751.557
1165.16	774.132
1165.85	796.442
1166.55	828.805
1167.24	856.839
1167.93	885.339
1168.62	916.806
1169.31	904.764
1170	895.209
1170.7	913.49
1171.39	924.047
1172.08	963.716
1172.77	983.112
1173.46	964.804
1174.15	989.511
1174.85	1044.26
1175.54	1041.55
1176.23	1071.13
1176.92	1060.06
1177.61	1125.57
1178.3	1104.8
1179	1130.47
1179.69	1180.74
1180.38	1215.56
1181.07	1271.33
1181.76	1257.77
1182.45	1245.04
1183.15	1323.37
1183.84	1344.49
1184.53	1352.71
1185.22	1347.88
1185.91	1410.23
1186.6	1468.45
1187.3	1524.38
1187.99	1497.55
1188.68	1521.84
1189.37	1549.25
1190.06	1584.62
1190.75	1589.86
1191.45	1675.35
1192.14	1753.45
1192.83	1701.5
1193.52	1745.87
1194.21	1792.63
1194.9	1879.44
1195.6	1897.68
1196.29	1929.1
1196.98	1936.93
1197.67	2000.22
1198.36	2016.91
1199.05	2045.45
1199.75	2049.95
1200.44	2073.85
1201.13	2078.74
1201.82	2129.55
1202.51	2212.69
1203.2	2241.61
1203.9	2261.81
1204.59	2281.12
1205.28	2259.04
1205.97	2255.54
1206.66	2304.06
1207.35	2284.99
1208.05	2265.94
1208.74	2291.8
1209.43	2266.28
1210.12	2213.68
1210.81	2240.36
1211.5	2276.76
1212.2	2278
1212.89	2220.41
1213.58	2182.57
1214.27	2206.53
1214.96	2206.03
1215.65	2147.17
1216.35	2220.14
1217.04	2188.15
1217.73	2175.47
1218.42	2147.34
1219.11	2111.32
1219.8	2149.73
1220.5	2076.43
1221.19	2062.5
1221.88	2061.08
1222.57	2121.86
1223.26	1971.68
1223.95	1914.29
1224.64	1934.23
1225.34	1911.95
1226.03	1926.66
1226.72	2001.49
1227.41	2035.41
1228.1	1960.04
1228.8	1939.61
1229.49	1940.45
1230.18	1903.44
1230.87	1900.84
1231.56	1928.61
1232.25	1910.17
1232.95	1889.8
1233.64	1892.41
1234.33	1895.07
1235.02	1820.24
1235.71	1809.67
1236.4	1786.14
1237.1	1796.06
1237.79	1812.03
1238.48	1730.85
1239.17	1722.52
1239.86	1734.99
1240.55	1753.72
1241.24	1769.56
1241.94	1717.15
1242.63	1739.19
1243.32	1753.4
1244.01	1753.77
1244.7	1703.07
1245.39	1726.18
1246.09	1713.66
1246.78	1742.82
1247.47	1703.75
1248.16	1646.43
1248.85	1668.88
1249.54	1736.34
1250.24	1655.63
1250.93	1644.98
1251.62	1672.09
1252.31	1675.26
1253	1693.11
1253.69	1622.3
1254.39	1622.38
1255.08	1695.61
1255.77	1669.42
1256.46	1698.73
1257.15	1684.15
1257.85	1704.66
1258.54	1720.05
1259.23	1703.72
1259.92	1687.13
1260.61	1729.68
1261.3	1766.22
1261.99	1725.19
1262.69	1707.89
1263.38	1630.12
1264.07	1726.13
1264.76	1810.03
1265.45	1755.29
1266.14	1806.63
1266.84	1873.01
1267.53	1838.13
1268.22	1910.29
1268.91	1851.37
1269.6	1919.06
1270.29	1938.13
1270.99	1925.88
1271.68	1903.75
1272.37	1941.89
1273.06	2025.73
1273.75	1960.32
1274.44	1950.47
1275.14	2009.78
1275.83	2030.91
1276.52	1967.62
1277.21	2137.12
1277.9	2178.58
1278.59	2169.35
1279.29	2188.02
1279.98	2166.49
1280.67	2181.67
1281.36	2225.69
1282.05	2249.41
1282.74	2285.14
1283.44	2259.36
1284.13	2295.42
1284.82	2357.82
1285.51	2328.68
1286.2	2323.14
1286.89	2390.15
1287.59	2341.68
1288.28	2334.87
1288.97	2424.33
1289.66	2420.31
1290.35	2439.11
1291.04	2452.19
1291.74	2379.59
1292.43	2356.02
1293.12	2442.01
1293.81	2414.77
1294.5	2407.85
1295.19	2453.49
1295.89	2417.38
1296.58	2389.64
1297.27	2409.96
1297.96	2411.47
1298.65	2456.2
1299.34	2423.79
1300.04	2388.94
1300.73	2393.41
1301.42	2397.11
1302.11	2333.16
1302.8	2346.44
1303.49	2323.67
1304.19	2274.95
1304.88	2322.09
1305.57	2239.66
1306.26	2332.31
1306.95	2296.14
1307.64	2280.15
1308.34	2240.73
1309.03	2211.79
1309.72	2259.51
1310.41	2205.28
1311.1	2137.54
1311.79	2130.17
1312.49	2175.5
1313.18	2135.78
1313.87	2100.35
1314.56	2033.68
1315.25	2044.02
1315.94	2060.01
1316.64	2132.34
1317.33	2095.33
1318.02	2052.3
1318.71	1970.68
1319.4	2022.26
1320.09	1991.82
1320.79	2006.61
1321.48	2038.25
1322.17	2002.03
1322.86	1991.34
1323.55	1939.75
1324.24	1946.72
1324.94	1941.72
1325.63	1944.18
1326.32	1896.4
1327.01	1945.83
1327.7	1948.5
1328.39	1867.41
1329.09	1870.21
1329.78	1929.77
1330.47	1910.66
1331.16	1890.13
1331.85	1884.46
1332.54	1873.07
1333.24	1862.65
1333.93	1850.73
1334.62	1891.91
1335.31	1801.59
1336	1813.72
1336.69	1767.84
1337.39	1815.03
1338.08	1804.44
1338.77	1723.63
1339.46	1721.53
1340.15	1740.32
1340.84	1710.58
1341.54	1729.59
1342.23	1677.57
1342.92	1695.15
1343.61	1662.47
1344.3	1624.13
1344.99	1641.8
1345.69	1657.98
1346.38	1619.91
1347.07	1564.95
1347.76	1540.55
1348.45	1536.19
1349.14	1499.55
1349.84	1512.59
1350.53	1496.91
1351.22	1485.26
1351.91	1412.02
1352.6	1444.02
1353.29	1410.33
1353.99	1391.83
1354.68	1380.21
1355.37	1342.58
1356.06	1307.47
1356.75	1317.3
1357.44	1318.66
1358.14	1305.02
1358.83	1240.14
1359.52	1210.02
1360.21	1242.33
1360.9	1223.06
1361.59	1205.81
1362.29	1181.5
1362.98	1170.71
1363.67	1131.48
1364.36	1148.37
1365.05	1145.98
1365.74	1093.9
1366.44	1130.38
1367.13	1114.62
1367.82	1101.53
1368.51	1100.76
1369.2	1066.99
1369.89	1093.63
1370.59	1115.82
1371.28	1089.84
1371.97	1081.84
1372.66	1083.98
1373.35	1120.17
1374.04	1091.8
1374.74	1104.32
1375.43	1053.93
1376.12	1017.08
1376.81	1077.45
1377.5	1116.66
1378.19	1094.54
1378.89	1070.88
1379.58	1096.2
1380.27	1046.86
1380.96	1072.43
1381.65	1008.73
1382.34	1047.14
1383.04	1049.76
1383.73	1059.96
1384.42	1088.84
1385.11	1052.05
1385.8	1046.77
1386.49	1051.59
1387.19	1025.1
1387.88	1130.26
1388.57	1070.05
1389.26	1029.45
1389.95	1105.63
1390.64	1119.53
1391.34	1080.06
1392.03	1131.9
1392.72	1109.59
1393.41	1124.22
1394.1	1156.53
1394.79	1144.96
1395.49	1138.78
1396.18	1140.82
1396.87	1160.28
1397.56	1180.3
1398.25	1198.6
1398.94	1174.47
1399.64	1243.54
1400.33	1237.13
1401.02	1200.8
1401.71	1247.37
1402.4	1220.08
1403.09	1196.29
1403.79	1218.36
1404.48	1262.27
1405.17	1297.51
1405.86	1302.01
1406.55	1321.66
1407.24	1347.06
1407.94	1329.04
1408.63	1329.12
1409.32	1338.22
1410.01	1286
1410.7	1345.98
1411.39	1354.25
1412.09	1360.96
1412.78	1372.74
1413.47	1377.5
1414.16	1366.2
1414.85	1395.07
1415.54	1429.07
1416.24	1443.37
1416.93	1435.06
1417.62	1448.68
1418.31	1430.22
1419	1414.2
1419.69	1430.49
1420.39	1406.35
1421.08	1411.97
1421.77	1460.55
1422.46	1447.01
1423.15	1442.18
1423.84	1407.96
1424.54	1394.67
1425.23	1407.8
1425.92	1417.96
1426.61	1441.04
1427.3	1442.18
1427.99	1413.81
1428.69	1408.4
1429.38	1399.11
1430.07	1421.44
1430.76	1437.67
1431.45	1432.99
1432.14	1412.55
1432.84	1412.46
1433.53	1455.57
1434.22	1405.86
1434.91	1408.5
1435.6	1378.93
1436.29	1357.54
1436.99	1373.7
1437.68	1368.28
1438.37	1357.18
1439.06	1372.04
1439.75	1336.16
1440.44	1363.11
1441.14	1336.34
1441.83	1309.91
1442.52	1274.99
1443.21	1305.46
1443.9	1289
1444.59	1244.07
1445.29	1218.3
1445.98	1204.77
1446.67	1201.07
1447.36	1189.75
1448.05	1154.22
1448.74	1154.97
1449.44	1146.73
1450.13	1155.44
1450.82	1145.99
1451.51	1163.93
1452.2	1112.56
1452.89	1111.72
1453.59	1130.72
1454.28	1121.16
1454.97	1165.47
1455.66	1134.04
1456.35	1121.61
1457.04	1161.79
1457.74	1113.57
1458.43	1090.18
1459.12	1124.89
1459.81	1114.03
1460.5	1107.67
1461.19	1098.62
1461.89	1115.79
1462.58	1120.14
1463.27	1101.91
1463.96	1098.16
1464.65	1088.79
1465.34	1132.33
1466.04	1101.4
1466.73	1120.92
1467.42	1139.35
1468.11	1097.47
1468.8	1078.62
1469.49	1082.69
1470.19	1082.37
1470.88	1122.96
1471.57	1121.02
1472.26	1080.93
1472.95	1099.97
1473.64	1112.46
1474.34	1095.71
1475.03	1119.43
1475.72	1123.72
1476.41	1166.39
1477.1	1112.95
1477.79	1131.34
1478.49	1107.59
1479.18	1120.68
1479.87	1121.66
1480.56	1133.83
1481.25	1115.8
1481.94	1113.77
1482.64	1135.22
[truncated: 748 more rows]

## Sheet: VTL2_784_pos1_transredorange
100	89.3465
100.692	184.855
101.383	155.2
102.075	186.984
102.767	205.924
103.458	206.782
104.15	216.127
104.842	218.721
105.533	143.057
106.225	154.147
106.917	227.312
107.608	242.575
108.3	160.543
108.992	104.893
109.683	219.52
110.375	179.016
111.067	186.757
111.758	176.545
112.45	161.035
113.142	212.859
113.833	166.671
114.525	166.17
115.217	167.352
115.908	200.736
116.6	219.271
117.292	184.158
117.983	172.021
118.675	250.564
119.367	209.214
120.058	202.08
120.75	234.888
121.442	257.038
122.133	228.337
122.825	227.369
123.517	211.245
124.208	218.837
124.9	245.952
125.592	288.558
126.283	317.698
126.975	224.991
127.667	350.161
128.358	312.472
129.05	219.284
129.742	168.422
130.433	196.414
131.125	258.949
131.817	298.848
132.508	313.11
133.2	250.523
133.892	215.057
134.583	271.161
135.275	370.244
135.967	298.543
136.658	223.433
137.35	208.352
138.042	217.376
138.733	247.012
139.425	277.876
140.116	259.498
140.808	304.272
141.5	232.237
142.191	283.919
142.883	320.348
143.575	264.801
144.266	189.209
144.958	280.05
145.65	265.272
146.341	236.974
147.033	271.012
147.725	303.261
148.416	289.693
149.108	283.083
149.8	251.012
150.491	208.115
151.183	268.576
151.875	302.304
152.566	338.631
153.258	411.195
153.95	259.756
154.641	237.852
155.333	378.619
156.025	369.958
156.716	311.236
157.408	306.653
158.1	323.236
158.791	347.459
159.483	392.181
160.175	489.464
160.866	449.771
161.558	343.29
162.25	290.872
162.941	256.893
163.633	280.021
164.325	385.153
165.016	345.143
165.708	369.458
166.4	450.036
167.091	430.395
167.783	376.62
168.475	470.381
169.166	479.587
169.858	445.721
170.55	423.548
171.241	406.478
171.933	365.161
172.625	479.824
173.316	443.238
174.008	484.765
174.7	492.433
175.391	449.07
176.083	421.621
176.775	480.768
177.466	418.505
178.158	429.104
178.85	372.808
179.541	317.452
180.233	346.507
180.925	443.177
181.616	430.488
182.308	352.162
183	335.393
183.691	435.119
184.383	472.568
185.075	428.201
185.766	417.448
186.458	459.698
187.15	375.171
187.841	420.873
188.533	445.891
189.225	467.171
189.916	487.91
190.608	466.705
191.3	413.992
191.991	423.843
192.683	435.719
193.375	441.246
194.066	403.888
194.758	385.59
195.45	481.468
196.141	428.723
196.833	510.411
197.525	463.374
198.216	425.673
198.908	433.704
199.6	465.439
200.291	487.883
200.983	450.455
201.675	476.689
202.366	476.024
203.058	484.203
203.75	534.963
204.441	580.277
205.133	520.612
205.825	542.53
206.516	575.534
207.208	587.259
207.9	605.515
208.591	572.503
209.283	528.706
209.975	631.757
210.666	523.838
211.358	548.933
212.05	552.358
212.741	578.299
213.433	603.693
214.125	569.464
214.816	469.078
215.508	545.725
216.199	674.237
216.891	616.616
217.583	575.606
218.274	561.076
218.966	543.226
219.658	584.761
220.349	677.414
221.041	618.844
221.733	608.752
222.424	556.159
223.116	546.621
223.808	589.574
224.499	541.96
225.191	566.297
225.883	541.847
226.574	550.074
227.266	534.033
227.958	570.47
228.649	615.934
229.341	536.716
230.033	658.305
230.724	585.496
231.416	512.787
232.108	463.441
232.799	476.557
233.491	522.815
234.183	539.364
234.874	593.247
235.566	635.761
236.258	596.705
236.949	569.906
237.641	573.933
238.333	587.284
239.024	580.575
239.716	553.08
240.408	711.087
241.099	627.251
241.791	604.22
242.483	592.283
243.174	593.238
243.866	628.384
244.558	610.82
245.249	616.354
245.941	589.523
246.633	612.058
247.324	641.927
248.016	626.986
248.708	611.85
249.399	706.884
250.091	669.883
250.783	704.368
251.474	692.781
252.166	671.213
252.858	691.946
253.549	713.883
254.241	664.605
254.933	700.211
255.624	715.288
256.316	720.074
257.008	756.81
257.699	762.316
258.391	756.777
259.083	773.8
259.774	706.894
260.466	691.748
261.158	753.449
261.849	765.297
262.541	770.424
263.233	753.909
263.924	749.351
264.616	848.646
265.308	773.55
265.999	834.599
266.691	797.844
267.383	823.098
268.074	832.328
268.766	758.776
269.458	684.951
270.149	783.534
270.841	727.436
271.533	800.172
272.224	731.466
272.916	775.249
273.608	801.792
274.299	698.402
274.991	775.75
275.683	732.898
276.374	728.992
277.066	729.651
277.758	796.896
278.449	795.954
279.141	742.194
279.833	761.222
280.524	670.525
281.216	756.099
281.908	761.745
282.599	718.924
283.291	716.988
283.983	743.678
284.674	737.129
285.366	691.713
286.058	712.801
286.749	704.604
287.441	687.742
288.133	727.22
288.824	769.577
289.516	800.697
290.207	823.637
290.899	740.694
291.591	736.016
292.283	679.708
292.974	679.117
293.666	688.463
294.357	718.497
295.049	747.043
295.741	712.528
296.432	715.543
297.124	728.287
297.816	714.214
298.507	689.296
299.199	688.947
299.891	695.053
300.582	706.024
301.274	771.71
301.966	730.2
302.657	752.577
303.349	781.512
304.041	684.349
304.732	632.164
305.424	674.336
306.116	693.885
306.807	641.632
307.499	513.476
308.191	584.376
308.882	666.011
309.574	694.408
310.266	663.613
310.957	592.453
311.649	523.776
312.341	539.755
313.032	554.349
313.724	561.817
314.416	522.798
315.107	575.487
315.799	597.231
316.491	559.949
317.182	592.826
317.874	452.05
318.566	480.657
319.257	534.006
319.949	578.271
320.641	531.256
321.332	492.04
322.024	520.891
322.716	514.139
323.407	475.006
324.099	502.793
324.791	370.109
325.482	426.93
326.174	504.322
326.866	512.966
327.557	494.164
328.249	491.492
328.941	479.27
329.632	412.886
330.324	423.88
331.016	468.748
331.707	453.8
332.399	394.726
333.091	376.857
333.782	432.317
334.474	434.059
335.166	443.837
335.857	492.406
336.549	479.734
337.241	439.625
337.932	426.478
338.624	452.722
339.316	476.399
340.007	448.14
340.699	497.124
341.391	437.151
342.082	427.526
342.774	479.085
343.466	500.553
344.157	456.643
344.849	406.298
345.541	340.227
346.232	386.93
346.924	449.24
347.616	430.61
348.307	427.086
348.999	403.989
349.691	364.417
350.382	386.928
351.074	416.979
351.766	316.707
352.457	401.113
353.149	393.808
353.841	393.044
354.532	412.394
355.224	384.971
355.916	337.528
356.607	468.155
357.299	464.906
357.991	425.811
358.682	427.26
359.374	394.736
360.066	368.548
360.757	398.347
361.449	451.804
362.14	437.008
362.832	412.237
363.524	353.523
364.216	429.017
364.907	439.317
365.599	437.61
366.291	429.845
366.982	417.736
367.674	426.434
368.365	370.253
369.057	372.671
369.749	476.047
370.44	463.427
371.132	455.643
371.824	476.191
372.515	462.357
373.207	386.075
373.899	348.35
374.59	500.496
375.282	460.464
375.974	467.286
376.665	440.516
377.357	463.05
378.049	508.823
378.74	483.045
379.432	395.073
380.124	421.513
380.815	418.994
381.507	404.15
382.199	453.158
382.89	407.949
383.582	390.468
384.274	420.014
384.965	390.409
385.657	385.186
386.349	517.076
387.04	357.815
387.732	363.475
388.424	444.718
389.115	472.744
389.807	448.862
390.499	431.838
391.19	428.689
391.882	403.075
392.574	447.525
393.265	376.654
393.957	425.256
394.649	446.886
395.34	385.175
396.032	341.541
396.724	377.879
397.415	391.778
398.107	416.292
398.799	414.485
399.49	329.248
400.182	367.202
400.874	376.451
401.565	382.457
402.257	407.922
402.949	384.026
403.64	296.056
404.332	319.363
405.024	372.22
405.715	322.084
406.407	304.697
407.099	290.875
407.79	295.024
408.482	323.584
409.174	341.93
409.865	337.661
410.557	290.056
411.249	312.931
411.94	238.702
412.632	280.618
413.324	266.204
414.015	273.748
414.707	312.112
415.399	250.166
416.09	300.432
416.782	296.355
417.474	271.585
418.165	232.669
418.857	278.295
419.549	292.926
420.24	297.071
420.932	304.593
421.624	264.524
422.315	281.534
423.007	228.582
423.699	298.308
424.39	370.678
425.082	336.53
425.774	292.351
426.465	303.003
427.157	309.285
427.849	261.562
428.54	296.247
429.232	342.106
429.924	280.53
430.615	242.057
431.307	297.62
431.999	297.239
432.69	270.746
433.382	265.06
434.074	243.913
434.765	231.944
435.457	258.105
436.149	361.229
436.84	302.022
437.532	225.113
438.224	230.403
438.915	275.926
439.607	305.571
440.298	296.559
440.99	248.805
441.682	311.515
442.373	148.804
443.065	276.266
443.757	229.834
444.448	243.394
445.14	293.038
445.832	295.778
446.523	250.884
447.215	222.777
447.907	321.572
448.598	327.253
449.29	264.253
449.982	264.135
450.673	246.179
451.365	226.645
452.057	255.659
452.748	292.226
453.44	260.695
454.132	231.066
454.823	228.171
455.515	235.376
456.207	316.776
456.898	319.902
457.59	299.141
458.282	272.366
458.973	211.62
459.665	164.873
460.357	216.973
461.048	167.485
461.74	260.198
462.432	221.537
463.123	259.078
463.815	333.592
464.507	296.888
465.198	232.43
465.89	223.477
466.582	226.27
467.273	259.677
467.965	249.792
468.657	246.074
469.348	198.315
470.04	240.96
470.732	253.964
471.423	256.946
472.115	260.225
472.807	242.242
473.498	232.556
474.19	286.624
474.882	287.717
475.573	292.681
476.265	263.446
476.957	290.836
477.648	270.899
478.34	255.825
479.032	269.298
479.723	253.398
480.415	227.876
481.107	322.457
481.798	267.862
482.49	228.415
483.182	199.906
483.873	281.04
484.565	329.489
485.257	299.24
485.948	280.683
486.64	259.706
487.332	133.871
488.023	286.431
488.715	279.845
489.407	215.94
490.098	171.532
490.79	169.549
491.482	219.401
492.173	277.989
492.865	278.015
493.557	229.077
494.248	226.442
494.94	232.463
495.632	129.791
496.323	146.161
497.015	263.983
497.707	247.912
498.398	229.453
499.09	254.002
499.782	266.105
500.473	246.747
501.165	226.072
501.857	167.476
502.548	202.119
503.24	220.265
503.932	162.189
504.623	191.56
505.315	221.584
506.007	198.986
506.698	185.21
507.39	206.098
508.082	202.309
508.773	223.5
509.465	274.065
510.157	111.616
510.848	164.487
511.54	208.167
512.232	208.614
512.923	159.642
513.615	152.366
514.307	200.325
514.998	202.83
515.69	161.482
516.382	139.773
517.073	231.969
517.765	118.29
518.456	203.433
519.148	136.242
519.84	159.363
520.531	197.852
521.223	163.424
521.915	121.54
522.607	94.7389
523.298	155.447
523.99	153.932
524.681	228.061
525.373	179.196
526.065	157.01
526.756	90.8974
527.448	81.709
528.14	116.096
528.831	142.751
529.523	169.322
530.215	163.044
530.906	150.4
531.598	78.3873
532.29	174.253
532.981	201.375
533.673	137.072
534.365	111.51
535.056	130.091
535.748	129.765
536.44	107.2
537.131	126.396
537.823	186.196
538.515	116.88
539.206	177.97
539.898	133.407
540.59	133.908
541.281	146.967
541.973	184.675
542.665	221.535
543.356	200.257
544.048	158.507
544.74	158.368
545.431	65.2576
546.123	36.3007
546.815	176.472
547.506	171.129
548.198	153.953
548.89	153.626
549.581	159.917
550.273	180.85
550.965	192.878
551.656	165.389
552.348	142.63
553.04	189.475
553.731	116.075
554.423	151.853
555.115	193.652
555.806	142.727
556.498	117.242
557.19	173.925
557.881	150.65
558.573	119.073
559.265	131.101
559.956	81.7986
560.648	125.76
561.34	175.279
562.031	166.428
562.723	93.85
563.415	153.952
564.106	155.631
564.798	130.626
565.49	131.917
566.181	139.823
566.873	129.059
567.565	133.698
568.256	178.71
568.948	167.498
569.64	101.961
570.331	131.459
571.023	132.123
571.715	138.055
572.406	115.213
573.098	138.657
573.79	156.638
574.481	164.209
575.173	155.426
575.865	104.704
576.556	163.128
577.248	179.583
577.94	97.863
578.631	108.625
579.323	116.612
580.015	117.657
580.706	103.032
581.398	129.81
582.09	157.92
582.781	121.018
583.473	107.449
584.165	197.918
584.856	137.926
585.548	161.182
586.24	173.653
586.931	149.998
587.623	142.808
588.315	161.58
589.006	172.484
589.698	142.082
590.39	111.673
591.081	85.0861
591.773	67.7363
592.464	121.44
593.156	126.745
593.848	140.038
594.539	88.9674
595.231	147.878
595.923	128.608
596.615	113.527
597.306	145.61
597.998	163.595
598.689	192.451
599.381	167.229
600.073	101.447
600.764	165.442
601.456	92.8118
602.148	121.023
602.839	78.1342
603.531	170.162
604.223	195.681
604.914	196.258
605.606	147.058
606.298	122.542
606.989	98.0371
607.681	81.5569
608.373	101.961
609.064	122.88
609.756	167.14
610.448	163.774
611.139	109.758
611.831	153.846
612.523	159.856
613.214	122.217
613.906	122.178
614.598	135.758
615.289	132.838
615.981	130.14
616.673	138.988
617.364	137.921
618.056	132.31
618.748	166.914
619.439	156.705
620.131	146.159
620.823	103.336
621.514	122.561
622.206	144.576
622.898	114.46
623.589	158.395
624.281	151.057
624.973	83.8349
625.664	110.65
626.356	194.296
627.048	175.009
627.739	133.295
628.431	174.282
629.123	145.566
629.814	140.281
630.506	107.034
631.198	146.957
631.889	144.517
632.581	120.314
633.273	142.825
633.964	170.799
634.656	165.375
635.348	162.576
636.039	160.846
636.731	204.566
637.423	102.001
638.114	228.828
638.806	137.223
639.498	180.989
640.189	127.207
640.881	149.561
641.573	126.591
642.264	80.3149
642.956	93.9479
643.648	129.51
644.339	131.049
645.031	128.973
645.723	129.66
646.414	119.241
647.106	128.626
647.798	112.345
648.489	120.806
649.181	134.538
649.873	127.067
650.564	181.783
651.256	197.979
651.948	142.421
652.639	131.948
653.331	144.907
654.023	83.2906
654.714	133.491
655.406	196.425
656.098	107.552
656.789	228.481
657.481	177.029
658.173	137.506
658.864	167.704
659.556	197.748
660.248	210.572
660.939	141.175
661.631	105.191
662.323	134.012
663.014	141.027
663.706	185.883
664.398	225.841
665.089	152.85
665.781	94.5929
666.473	145.707
667.164	152.031
667.856	154.461
668.547	160.888
669.239	139.136
669.931	121.822
670.622	179.661
671.314	205.548
672.006	165.729
672.698	175.104
673.389	225.219
674.081	234.166
674.772	228.326
675.464	143.273
676.156	133.936
676.847	187.217
677.539	224.664
678.231	214.358
678.922	185.372
679.614	153.744
680.306	159.057
680.997	188.372
681.689	200.419
682.381	189.05
683.072	166.913
683.764	134.829
684.456	125.444
685.147	168.771
685.839	159.056
686.531	207.415
687.222	127.689
687.914	143.747
688.606	231.647
689.297	190.769
689.989	166.892
690.681	150.414
691.372	156.698
692.064	161.267
692.756	138.027
693.447	149.229
694.139	158.267
694.831	145.187
695.522	126.928
696.214	99.3355
696.906	162.634
697.597	152.76
698.289	190.556
698.981	158.397
699.672	160.777
700.364	185.036
701.056	208.092
701.747	200.127
702.439	210.893
703.131	204.07
703.822	141.789
704.514	168.953
705.206	174.703
705.897	138.807
706.589	85.8499
707.281	204.481
707.972	192.517
708.664	65.028
709.356	104.687
710.047	185.61
710.739	179.106
711.431	147.146
712.122	171.261
712.814	191.364
713.506	157.767
714.197	147.902
714.889	169.269
715.581	116.621
716.272	100.598
716.964	86.7357
717.656	113.609
718.347	121.681
719.039	120.558
719.731	126.952
720.422	155.553
721.114	215.162
721.806	153.188
722.497	131.226
723.189	116.777
723.881	90.2807
724.572	82.5184
725.264	106.59
725.956	163.684
726.647	186.938
727.339	164.905
728.031	92.8659
728.722	76.5221
729.414	161.687
730.106	97.2911
730.797	115.181
731.489	160.458
732.181	151.457
732.872	85.5798
733.564	76.8332
734.256	131.91
734.947	173.828
735.639	185.064
736.331	178.038
737.022	142.601
737.714	118.101
738.406	157.093
739.097	168.684
739.789	145.609
740.481	117.505
741.172	165.791
741.864	134.108
742.556	174.702
743.247	158.968
743.939	161.196
744.63	103.565
745.322	143.911
746.014	137.781
746.706	106.27
747.397	104.972
748.089	129.879
748.781	136.431
749.472	104.006
750.164	124.2
750.855	119.556
751.547	69.9032
752.239	199.278
752.93	127.299
753.622	122.777
754.314	124.694
755.005	99.958
755.697	59.8183
756.389	107.921
757.08	120.267
757.772	105.485
758.464	125.3
759.155	130.666
759.847	153.415
760.539	159.271
761.23	103.066
761.922	94.8225
762.614	115.662
763.305	100.674
763.997	156.231
764.689	142.791
765.38	147.433
766.072	181.565
766.764	49.9228
767.455	82.4884
768.147	154.415
768.839	164.15
769.53	139.179
770.222	181.667
770.914	160.706
771.605	122.429
772.297	119.101
772.989	129.869
773.68	142.012
774.372	159.958
775.064	192.717
775.755	185.246
776.447	102.201
777.139	147.114
777.83	79.2363
778.522	177.374
779.214	110.943
779.905	110.241
780.597	103.008
781.289	79.3623
781.98	163.062
782.672	117.464
783.364	110.413
784.055	81.5485
784.747	118.775
785.439	141.721
786.13	114.101
786.822	93.4514
787.514	106.243
788.205	131.713
788.897	88.5727
789.589	61.8948
790.28	113.643
790.972	63.4755
791.664	107.021
792.355	100.69
793.047	169.55
793.739	115.883
794.43	82.7394
795.122	125.764
795.814	116.26
796.505	146.306
797.197	188.418
797.889	164.361
798.58	127.748
799.272	141.658
799.964	156.789
800.655	104.88
801.347	71.5055
802.039	131.75
802.73	161.548
803.422	109.036
804.114	95.7439
804.805	84.8164
805.497	108.021
806.189	140.478
806.88	124.557
807.572	94.8301
808.264	107.791
808.955	90.9739
809.647	62.013
810.339	52.9087
811.03	112.428
811.722	127.304
812.414	87.8113
813.105	120.477
813.797	147.677
814.489	137.652
815.18	115.382
815.872	130.907
816.564	135.246
817.255	141.433
817.947	115.803
818.638	104.598
819.33	81.2262
820.022	124.614
820.713	91.7498
821.405	134.693
822.097	87.2852
822.789	67.02
823.48	113.815
824.172	97.6247
824.863	94.8134
825.555	97.9524
826.247	99.6923
826.938	110.954
827.63	129.518
828.322	124.588
829.013	136.66
829.705	119.279
830.397	124.866
831.088	119.099
831.78	119.283
832.472	94.7676
833.163	77.9342
833.855	77.5503
834.547	94.5671
835.238	107.277
835.93	88.6631
836.622	127.95
837.313	142.811
838.005	122.08
838.697	110.136
839.388	88.2522
840.08	89.2194
840.772	84.9414
841.463	111.393
842.155	92.0044
842.847	105.442
843.538	80.5854
844.23	81.7517
844.922	90.9539
845.613	98.8965
846.305	126.286
846.997	86.7303
847.688	79.9644
848.38	52.7152
849.072	83.5211
849.763	93.5921
850.455	83.3336
851.147	108.131
851.838	84.3232
852.53	86.5149
853.222	117.406
853.913	64.5119
854.605	56.3484
855.297	80.7882
855.988	108.274
856.68	109.537
857.372	85.0008
858.063	93.2788
858.755	105.905
859.447	114.068
860.138	70.9809
860.83	143.826
861.522	83.7748
862.213	92.2488
862.905	131.109
863.597	139.759
864.288	106.157
864.98	76.3235
865.672	83.5044
866.363	100.768
867.055	92.778
867.747	76.5174
868.438	95.7142
869.13	127.824
869.822	109.271
870.513	71.179
871.205	82.2559
871.897	98.5394
872.588	93.4091
873.28	114.059
873.972	76.4601
874.663	83.0876
875.355	124.378
876.047	98.5032
876.738	84.5207
877.43	117.893
878.122	109.39
878.813	141.496
879.505	89.9598
880.197	52.1075
880.888	70.8207
881.58	96.9304
882.272	115.013
882.963	104.02
883.655	70.4977
884.347	79.3726
885.038	87.9126
885.73	79.4521
886.422	92.923
887.113	102.633
887.805	107.944
888.497	108.969
889.188	82.4427
889.88	88.6044
890.572	133.851
891.263	131.329
891.955	120.158
892.647	73.2132
893.338	80.6441
894.03	60.2197
894.721	66.8354
895.413	103.208
896.105	91.1478
896.797	68.2553
897.488	101.24
898.18	77.1108
898.872	29.4172
899.563	35.1575
900.255	64.656
900.946	116.057
901.638	146.177
902.33	113.422
903.021	98.5044
903.713	21.1087
904.405	35.0099
905.096	95.2331
905.788	48.3324
906.48	78.6797
907.171	87.5115
907.863	51.3613
908.555	78.6857
909.246	44.952
909.938	71.0995
910.63	41.9936
911.321	31.446
912.013	72.986
912.705	16.7221
913.396	81.5593
914.088	48.2089
914.78	88.1554
915.471	112.909
916.163	64.9042
916.855	76.1514
917.546	57.3883
918.238	53.8035
918.93	104.521
919.621	61.6939
920.313	77.7895
921.005	61.489
921.696	33.494
922.388	73.4849
923.08	70.1174
923.771	87.0406
924.463	100.019
925.155	63.0042
925.846	51.0035
926.538	67.9654
927.23	82.7225
927.921	60.3737
928.613	16.1072
929.305	37.0858
929.996	51.4667
930.688	67.5571
931.38	67.6196
932.071	80.4452
932.763	93.2608
933.455	72.4908
934.146	78.1822
934.838	107.182
935.53	116.669
936.221	134.941
936.913	91.9018
937.605	108.024
938.296	90.6259
938.988	156.339
939.68	58.4498
940.371	94.2124
941.063	42.678
941.755	61.5756
942.446	84.2678
943.138	91.3557
943.83	63.0205
944.521	93.9852
945.213	81.877
945.905	42.6144
946.596	33.9737
947.288	66.5767
947.98	95.7874
948.671	108.563
949.363	70.1742
950.055	36.6157
950.746	105.167
951.438	118.161
952.13	62.3565
952.821	92.2019
953.513	88.8301
954.205	108.917
954.896	82.577
955.588	55.8259
956.28	133.597
956.971	134.501
957.663	131.679
958.355	117.856
959.046	150.492
959.738	132.412
960.43	141.733
961.121	156.046
961.813	179.023
962.505	173.838
963.196	179.288
963.888	154.954
964.58	159.18
965.271	136.31
965.963	147.575
966.655	90.8529
967.346	144.19
968.038	127.249
968.73	124.601
969.421	67.2158
970.113	42.2735
970.804	68.7872
971.496	55.0822
972.188	99.4453
972.88	75.3907
973.571	85.3472
974.263	73.4845
974.954	83.2485
975.646	95.6033
976.338	71.51
977.029	76.8209
977.721	73.6934
978.413	42.6469
979.104	54.5773
979.796	64.3596
980.488	42.9787
981.179	50.2551
981.871	63.3548
982.563	59.0538
983.254	41.9633
983.946	37.6633
984.638	41.5615
985.329	46.1955
986.021	49.9191
986.713	63.6077
987.404	77.597
988.096	55.0476
988.788	60.0796
989.479	114.031
990.171	94.0758
990.863	81.2547
991.554	52.6081
992.246	40.4832
992.938	10.9434
993.629	88.5072
994.321	33.5702
995.013	27.1639
995.704	56.5961
996.396	92.4094
997.088	31.7692
997.779	92.8066
998.471	73.5361
999.163	51.6363
999.854	47.3152
1000.55	87.8843
1001.24	43.9334
1001.93	72.6846
1002.62	87.5088
1003.31	50.8299
1004	49.828
1004.7	61.0534
1005.39	68.6414
1006.08	107.013
1006.77	104.54
1007.46	122.951
1008.15	43.586
1008.85	35.9091
1009.54	45.2575
1010.23	90.6664
1010.92	97.6789
1011.61	67.4146
1012.3	56.3453
1013	55.133
1013.69	62.8311
1014.38	75.6861
1015.07	46.3259
1015.76	41.9176
1016.45	49.1024
1017.15	39.3691
1017.84	64.3957
1018.53	64.0044
1019.22	48.4219
1019.91	72.5221
1020.6	86.5376
1021.3	80.0548
1021.99	81.4495
1022.68	77.6827
1023.37	80.289
1024.06	91.4955
1024.75	74.9047
1025.45	81.5425
1026.14	79.8365
1026.83	107.7
1027.52	119.945
1028.21	108.704
1028.9	93.3401
1029.6	67.7707
1030.29	68.2754
1030.98	54.5691
1031.67	71.9076
1032.36	104.835
1033.05	94.4834
1033.75	84.3414
1034.44	61.5193
1035.13	121.441
1035.82	115.498
1036.51	116.28
1037.2	123.302
1037.9	106.014
1038.59	116.463
1039.28	92.1794
1039.97	51.3263
1040.66	137.943
1041.35	91.5399
1042.05	151.679
1042.74	143.055
1043.43	52.559
1044.12	88.4137
1044.81	86.2661
1045.5	135.429
1046.2	124.271
1046.89	151.125
1047.58	170.522
1048.27	128.623
1048.96	135.068
1049.65	94.9129
1050.35	122.97
1051.04	168.444
1051.73	199.585
1052.42	146.953
1053.11	139.777
1053.8	196.775
1054.5	152.172
1055.19	131.808
1055.88	128.82
1056.57	141.163
1057.26	184.118
1057.95	149.634
1058.65	152.102
1059.34	152.974
1060.03	213.548
1060.72	189.596
1061.41	144.796
1062.1	244.252
1062.8	213.163
1063.49	173.719
1064.18	191.813
1064.87	173.971
1065.56	228.157
1066.25	233.822
1066.95	235.389
1067.64	257.355
1068.33	286.158
1069.02	281.046
1069.71	331.022
1070.4	346.015
1071.1	290.939
1071.79	303.361
1072.48	323.962
1073.17	292.372
1073.86	331.427
1074.55	362.067
1075.25	363.819
1075.94	405.682
1076.63	389.615
1077.32	372.648
1078.01	387.032
1078.7	356.411
1079.4	379.602
1080.09	402.202
1080.78	405.285
1081.47	363.278
1082.16	373.926
1082.85	361.324
1083.55	291.783
1084.24	329.778
1084.93	339.134
1085.62	340.804
1086.31	381.297
1087	386.263
1087.7	379.297
1088.39	377.836
1089.08	374.169
1089.77	345.973
1090.46	351.003
1091.15	367.716
1091.85	373.997
1092.54	373.545
1093.23	375.089
1093.92	369.715
1094.61	378.016
1095.3	402.031
1096	405.233
1096.69	427.927
1097.38	418.179
1098.07	414.05
1098.76	448.03
1099.45	419.227
1100.15	436.07
1100.84	430.085
1101.53	436.647
1102.22	455.094
1102.91	425.791
1103.6	436.285
1104.3	490.091
1104.99	483.132
1105.68	510.07
1106.37	487.15
1107.06	500.446
1107.75	520.005
1108.45	507.392
1109.14	488.705
1109.83	519.695
1110.52	535.932
1111.21	525.689
1111.9	510.182
1112.6	602.65
1113.29	590.681
1113.98	563.598
1114.67	579.435
1115.36	584.425
1116.05	649.171
1116.75	626.44
1117.44	598.632
1118.13	582.029
1118.82	628.754
1119.51	660.633
1120.2	514.132
1120.9	599.753
1121.59	667.265
1122.28	619.559
1122.97	663.573
1123.66	699.317
1124.35	683.726
1125.05	703.758
1125.74	717.687
1126.43	696.778
1127.12	716.638
1127.81	709.21
1128.5	687.872
1129.2	697.851
1129.89	706.78
1130.58	739.888
1131.27	739.285
1131.96	766.059
1132.65	818.762
1133.35	719.554
1134.04	801.287
1134.73	741.32
1135.42	807.218
1136.11	857.94
1136.8	847.183
1137.5	820.033
1138.19	834.483
1138.88	919.422
1139.57	898.96
1140.26	925.07
1140.95	862.42
1141.65	890.027
1142.34	945.865
1143.03	856.996
1143.72	943.181
1144.41	991.502
1145.1	920.367
1145.8	954.383
1146.49	982.94
1147.18	994.813
1147.87	1026.3
1148.56	1072.86
1149.25	999.019
1149.95	987.464
1150.64	1067.49
1151.33	1106.63
1152.02	1097.38
1152.71	1122.28
1153.4	1140.11
1154.1	1154.76
1154.79	1207.67
1155.48	1152.3
1156.17	1104.23
1156.86	1185.3
1157.55	1170.09
1158.25	1244.24
1158.94	1332.04
1159.63	1302.75
1160.32	1303.44
1161.01	1383.62
1161.7	1393.01
1162.4	1378.21
1163.09	1414.65
1163.78	1424.6
1164.47	1461.41
1165.16	1564.29
1165.85	1583.22
1166.55	1527.08
1167.24	1541.21
1167.93	1594.11
1168.62	1622.36
1169.31	1620.97
1170	1653.47
1170.7	1676.53
1171.39	1695.41
1172.08	1766.66
1172.77	1811.15
1173.46	1831.92
1174.15	1880.95
1174.85	1975.93
1175.54	2002.17
1176.23	2049.26
1176.92	2075.64
1177.61	2106.12
1178.3	2173.03
1179	2245.44
1179.69	2253.7
1180.38	2285.04
1181.07	2353.64
1181.76	2412.14
1182.45	2467.64
1183.15	2533.07
1183.84	2634.16
1184.53	2606.36
1185.22	2749.49
1185.91	2834.93
1186.6	2830.41
1187.3	2980.32
1187.99	2985.68
1188.68	3074.37
1189.37	3070.96
1190.06	3251.08
1190.75	3294.46
1191.45	3400.89
1192.14	3371.08
1192.83	3437.34
1193.52	3483.1
1194.21	3602.33
1194.9	3769.35
1195.6	3863.27
1196.29	3951.74
1196.98	4056.13
1197.67	4144.98
1198.36	4185.22
1199.05	4232.79
1199.75	4317.04
1200.44	4388.78
1201.13	4410.5
1201.82	4468.04
1202.51	4543.71
1203.2	4551.38
1203.9	4667.21
1204.59	4663
1205.28	4707.48
1205.97	4749.37
1206.66	4826.25
1207.35	4826.01
1208.05	4774.02
1208.74	4845.37
1209.43	4863.01
1210.12	4813.05
1210.81	4738.97
1211.5	4801.73
1212.2	4786.33
1212.89	4769.38
1213.58	4662.96
1214.27	4608.57
1214.96	4629.25
1215.65	4550.85
1216.35	4601.06
1217.04	4554.64
1217.73	4466.59
1218.42	4446.65
1219.11	4383.99
1219.8	4213.16
1220.5	4394.64
1221.19	4309.67
1221.88	4326.39
1222.57	4177.42
1223.26	4166.75
1223.95	4103.06
1224.64	4135.73
1225.34	4204.48
1226.03	4159.78
1226.72	4068.76
1227.41	4081.28
1228.1	4052.36
1228.8	3922.98
1229.49	3990.3
1230.18	3941.53
1230.87	3896.63
1231.56	3888.54
1232.25	3887.19
1232.95	3831.16
1233.64	3854.5
1234.33	3809.36
1235.02	3792.95
1235.71	3833.19
1236.4	3808.66
1237.1	3699.02
1237.79	3723.49
1238.48	3722.66
1239.17	3728.7
1239.86	3714.94
1240.55	3604.19
1241.24	3618.54
1241.94	3607.52
1242.63	3610.27
1243.32	3513.61
1244.01	3443.99
1244.7	3438.98
1245.39	3445.91
1246.09	3492.37
1246.78	3536.98
1247.47	3418.39
1248.16	3350.15
1248.85	3444.25
1249.54	3423.12
1250.24	3390.53
1250.93	3462.92
1251.62	3351.91
1252.31	3413.33
1253	3416.5
1253.69	3357.76
1254.39	3345.62
1255.08	3353.11
1255.77	3283.28
1256.46	3319.53
1257.15	3359.52
1257.85	3403.5
1258.54	3493.16
1259.23	3429.65
1259.92	3376.34
1260.61	3439.89
1261.3	3457.44
1261.99	3513.49
1262.69	3549.78
1263.38	3540.78
1264.07	3647.29
1264.76	3666.25
1265.45	3618.34
1266.14	3706.86
1266.84	3862.82
1267.53	3828.8
1268.22	3799.04
1268.91	3802.03
1269.6	3876.15
1270.29	3874.51
1270.99	4084.03
1271.68	4177.14
1272.37	4096.19
1273.06	4133.38
1273.75	4225.21
1274.44	4324.16
1275.14	4294.51
1275.83	4344.59
1276.52	4360.43
1277.21	4456.14
1277.9	4545.7
1278.59	4567.81
1279.29	4596.19
1279.98	4631.42
1280.67	4681.24
1281.36	4733.8
1282.05	4712.1
1282.74	4792.75
1283.44	4782.91
1284.13	4880.62
1284.82	4784.1
1285.51	4819.25
1286.2	4926.05
1286.89	5086.56
1287.59	4912.25
1288.28	5106.59
1288.97	5075.11
1289.66	4961.85
1290.35	4967.59
1291.04	5032.67
1291.74	5125.81
1292.43	5078.94
1293.12	4940.82
1293.81	4970.18
1294.5	4910.64
1295.19	4981.5
1295.89	5081.16
1296.58	5028.4
1297.27	4964.21
1297.96	4967.27
1298.65	5029.63
1299.34	4982.98
1300.04	4818.1
1300.73	4895.55
1301.42	4772.78
1302.11	4836.42
1302.8	4830.4
1303.49	4734.56
1304.19	4721.28
1304.88	4632.55
1305.57	4699.79
1306.26	4659.94
1306.95	4590.57
1307.64	4559.44
1308.34	4494.92
1309.03	4491.61
1309.72	4420.51
1310.41	4391.75
1311.1	4366.16
1311.79	4319.02
1312.49	4258.1
1313.18	4251.57
1313.87	4254.55
1314.56	4206.59
1315.25	4153.34
1315.94	4136.82
1316.64	4104.1
1317.33	4085.72
1318.02	4103.41
1318.71	4049.93
1319.4	3965.23
1320.09	3967.64
1320.79	3918.93
1321.48	3903.4
1322.17	3891.46
1322.86	3875.59
1323.55	3949.29
1324.24	3949.88
1324.94	3969.48
1325.63	3941.19
1326.32	3912.9
1327.01	3840.97
1327.7	3820.54
1328.39	3824.3
1329.09	3867.58
1329.78	3881.51
1330.47	3836.97
1331.16	3800.83
1331.85	3714.14
1332.54	3707.93
1333.24	3669.25
1333.93	3708.52
1334.62	3775.62
1335.31	3667.62
1336	3688.91
1336.69	3612.74
1337.39	3579.33
1338.08	3636.58
1338.77	3562.69
1339.46	3475.64
1340.15	3490.01
1340.84	3418.22
1341.54	3391.39
1342.23	3351.2
1342.92	3338.98
1343.61	3287.81
1344.3	3229.07
1344.99	3212.17
1345.69	3115.53
1346.38	3120.88
1347.07	3138.44
1347.76	2942.12
1348.45	2982.19
1349.14	2966.06
1349.84	3013.9
1350.53	2900.39
1351.22	2868.83
1351.91	2835.49
1352.6	2743.65
1353.29	2728.74
1353.99	2661.21
1354.68	2625.35
1355.37	2617.79
1356.06	2616.56
1356.75	2538.52
1357.44	2456.71
1358.14	2428.84
1358.83	2435.32
1359.52	2363.32
1360.21	2421.17
1360.9	2360.6
1361.59	2386.4
1362.29	2290.68
1362.98	2182.29
1363.67	2221.03
1364.36	2127.01
1365.05	2251.61
1365.74	2185.88
1366.44	2195.64
1367.13	2137.2
1367.82	2131.68
1368.51	2025.93
1369.2	2097.24
1369.89	2102.36
1370.59	2067.4
1371.28	2061.61
1371.97	2118.1
1372.66	2084.45
1373.35	2038.24
1374.04	1993.6
1374.74	2135.58
1375.43	2024.08
1376.12	2006.93
1376.81	1829.27
1377.5	2031.55
1378.19	2011.61
1378.89	2034.63
1379.58	2068.79
1380.27	1983.84
1380.96	2043.65
1381.65	2039.85
1382.34	2002.56
1383.04	2071.91
1383.73	2072.17
1384.42	2071.81
1385.11	2088.14
1385.8	2092.22
1386.49	1950.35
1387.19	2025.86
1387.88	2013.93
1388.57	2140.92
1389.26	2110.53
1389.95	2169.09
1390.64	2093.06
1391.34	2167.7
1392.03	2131.84
1392.72	2206.96
1393.41	2175.8
1394.1	2222.46
1394.79	2207.62
1395.49	2223.32
1396.18	2243.69
1396.87	2254.46
1397.56	2336.31
1398.25	2334
1398.94	2283.92
1399.64	2353.12
1400.33	2339.79
1401.02	2358.09
1401.71	2445.2
1402.4	2396.35
1403.09	2470.92
1403.79	2488.76
1404.48	2500.3
1405.17	2450.57
1405.86	2467.13
1406.55	2512.92
1407.24	2527.06
1407.94	2524.74
1408.63	2550.8
1409.32	2707.09
1410.01	2686.12
1410.7	2673.36
1411.39	2687.86
1412.09	2740.56
1412.78	2758.29
1413.47	2768.38
1414.16	2746.28
1414.85	2727.72
1415.54	2754.29
1416.24	2776.96
1416.93	2816.72
1417.62	2801.92
1418.31	2801.75
1419	2773.61
1419.69	2794.61
1420.39	2846.43
1421.08	2844.28
1421.77	2796.79
1422.46	2882.79
1423.15	2807.78
1423.84	2856.04
1424.54	2843.23
1425.23	2832.85
1425.92	2826.09
1426.61	2833.71
1427.3	2882.85
1427.99	2879.25
1428.69	2860.94
1429.38	2854.84
1430.07	2802.55
1430.76	2861.79
1431.45	2891.65
1432.14	2858.65
1432.84	2859.07
1433.53	2828.11
1434.22	2828.34
1434.91	2848.04
1435.6	2857.32
1436.29	2808.66
1436.99	2867.11
1437.68	2858.74
1438.37	2781.07
1439.06	2780.19
1439.75	2752.37
1440.44	2746.92
1441.14	2721.48
1441.83	2564.71
1442.52	2615.44
1443.21	2618.69
1443.9	2502.83
1444.59	2485.76
1445.29	2376.73
1445.98	2384.59
1446.67	2315.53
1447.36	2349.42
1448.05	2281.2
1448.74	2292.14
1449.44	2231.07
1450.13	2199.28
1450.82	2195.81
1451.51	2225.5
1452.2	2214.37
1452.89	2181.05
1453.59	2150.14
1454.28	2159.76
1454.97	2218.09
1455.66	2123.1
1456.35	2091.16
1457.04	2119.83
1457.74	2143.75
1458.43	2045.72
1459.12	2100.7
1459.81	2121.92
1460.5	2132.41
1461.19	2155.69
1461.89	2126.72
1462.58	2091.61
1463.27	2129.53
1463.96	2117.51
1464.65	2094.14
1465.34	2062.64
1466.04	2026.1
1466.73	2078.93
1467.42	2098.04
1468.11	2101.53
1468.8	2096.43
1469.49	2149.21
1470.19	2121.36
1470.88	2067.1
1471.57	2087.93
1472.26	2096.93
1472.95	2068.47
1473.64	2164.02
1474.34	2134.5
1475.03	2139.57
1475.72	2201.42
1476.41	2177.15
1477.1	2120.91
1477.79	2125.9
1478.49	2067.65
1479.18	2114.68
1479.87	2113.95
1480.56	2120.41
1481.25	2119.26
1481.94	2133.96
1482.64	2073.52
[truncated: 748 more rows]

## Sheet: VTL2_784_pos2_bone
100	303.888
100.692	203.296
101.383	376.835
102.075	304.84
102.767	226.616
103.458	236.648
104.15	296.583
104.842	334.881
105.533	305.214
106.225	289.019
106.917	335.296
107.608	329.7
108.3	244.815
108.992	239.232
109.683	288.71
110.375	363.327
111.067	354.551
111.758	317.668
112.45	249.914
113.142	138.983
113.833	274.16
114.525	229.734
115.217	283.323
115.908	251.502
116.6	252.553
117.292	383.709
117.983	309.472
118.675	70.7195
119.367	194.25
120.058	254.476
120.75	281.456
121.442	334.823
122.133	329.792
122.825	208.733
123.517	326.211
124.208	224.84
124.9	211.492
125.592	270.551
126.283	214.604
126.975	274.964
127.667	234.911
128.358	203.509
129.05	121.671
129.742	145.025
130.433	307.733
131.125	365.696
131.817	364.448
132.508	315.924
133.2	319.048
133.892	364.71
134.583	410.525
135.275	398.794
135.967	257.244
136.658	265.537
137.35	410.059
138.042	455.213
138.733	445.224
139.425	446.444
140.116	374.086
140.808	290.723
141.5	336.49
142.191	349.791
142.883	303.099
143.575	295.067
144.266	378.466
144.958	228.965
145.65	310.25
146.341	267.658
147.033	360.468
147.725	332.696
148.416	175.693
149.108	378.023
149.8	428.868
150.491	327.178
151.183	290.829
151.875	361.622
152.566	403.337
153.258	305.311
153.95	265.035
154.641	459.147
155.333	472.099
156.025	427.674
156.716	375.492
157.408	364.922
158.1	427.849
158.791	412.321
159.483	419.669
160.175	489.611
160.866	409.39
161.558	306.873
162.25	355.298
162.941	473.097
163.633	470.351
164.325	439.832
165.016	412.392
165.708	412.266
166.4	472.475
167.091	539.712
167.783	341.737
168.475	593.654
169.166	559.712
169.858	506.441
170.55	473.097
171.241	435.545
171.933	414.173
172.625	569.438
173.316	382.963
174.008	489.646
174.7	490.487
175.391	406.967
176.083	404.107
176.775	479.526
177.466	345.128
178.158	354.934
178.85	373.911
179.541	411.259
180.233	396.364
180.925	349.751
181.616	531.215
182.308	429.045
183	356.514
183.691	313.541
184.383	354.935
185.075	391.974
185.766	350.528
186.458	488.247
187.15	360.585
187.841	369.206
188.533	357.638
189.225	323.56
189.916	349.921
190.608	460.65
191.3	371.119
191.991	323.213
192.683	257.347
193.375	351.081
194.066	472.986
194.758	497.684
195.45	451.131
196.141	400.904
196.833	466.054
197.525	488.906
198.216	418.172
198.908	372.017
199.6	408.093
200.291	436.174
200.983	457.238
201.675	491.911
202.366	429.209
203.058	391.708
203.75	448.857
204.441	540.137
205.133	521.006
205.825	494.809
206.516	465.92
207.208	494.439
207.9	545.707
208.591	526.506
209.283	475.751
209.975	577.151
210.666	555.296
211.358	444.026
212.05	303.094
212.741	342.518
213.433	446.67
214.125	448.786
214.816	392.933
215.508	516.996
216.199	468.135
216.891	453.851
217.583	486.203
218.274	468.883
218.966	397.061
219.658	419.677
220.349	495.147
221.041	448.215
221.733	403.263
222.424	418.901
223.116	438.517
223.808	441.112
224.499	491.675
225.191	523.252
225.883	492.822
226.574	447.419
227.266	446.752
227.958	524.482
228.649	536.775
229.341	355.478
230.033	649.539
230.724	569.709
231.416	526.088
232.108	522.797
232.799	469.132
233.491	427.212
234.183	506.018
234.874	393.072
235.566	368.126
236.258	552.228
236.949	553.993
237.641	559.456
238.333	544.258
239.024	362.907
239.716	346.426
240.408	501.889
241.099	443.044
241.791	428.634
242.483	523.632
243.174	583.902
243.866	520.91
244.558	537.491
245.249	483.401
245.941	548.77
246.633	581.964
247.324	497.319
248.016	454.552
248.708	539.693
249.399	564.264
250.091	461.324
250.783	589.2
251.474	620.345
252.166	562.784
252.858	484.177
253.549	481.006
254.241	595.383
254.933	665.48
255.624	610.678
256.316	579.418
257.008	634.368
257.699	587.451
258.391	532.72
259.083	627.652
259.774	601.857
260.466	548.256
261.158	614.948
261.849	530.918
262.541	609.72
263.233	690.742
263.924	616.303
264.616	625.969
265.308	651.763
265.999	537.499
266.691	629.342
267.383	689.894
268.074	696.808
268.766	694.557
269.458	673.625
270.149	559.654
270.841	676.52
271.533	636.032
272.224	699.398
272.916	643.927
273.608	551.559
274.299	559.709
274.991	531.443
275.683	623.403
276.374	539.014
277.066	503.378
277.758	499.428
278.449	524.333
279.141	562.532
279.833	604.576
280.524	699.534
281.216	423.981
281.908	542.9
282.599	536.117
283.291	536.828
283.983	555.926
284.674	521.224
285.366	500.458
286.058	736.942
286.749	630.269
287.441	574.585
288.133	667.885
288.824	575.743
289.516	410.161
290.207	498.065
290.899	487.858
291.591	497.988
292.283	519.266
292.974	533.445
293.666	448.46
294.357	439.007
295.049	524.099
295.741	483.651
296.432	520.328
297.124	514.707
297.816	443.46
298.507	415.531
299.199	476.295
299.891	464.383
300.582	355.856
301.274	463.325
301.966	585.299
302.657	379.68
303.349	525.584
304.041	520.549
304.732	432.318
305.424	409.158
306.116	447.141
306.807	462.147
307.499	369.052
308.191	396.533
308.882	374.882
309.574	325.218
310.266	325.99
310.957	345.304
311.649	328.563
312.341	463.03
313.032	389.834
313.724	392.094
314.416	388.391
315.107	392.38
315.799	382.92
316.491	356.517
317.182	356.634
317.874	406.479
318.566	255.94
319.257	274.503
319.949	271.571
320.641	270.579
321.332	301.799
322.024	304.836
322.716	220.827
323.407	305.784
324.099	379.975
324.791	414.693
325.482	271.133
326.174	216.059
326.866	227.655
327.557	207
328.249	222.363
328.941	197.562
329.632	283.39
330.324	350.226
331.016	254.556
331.707	253.373
332.399	302.52
333.091	280.311
333.782	256.146
334.474	174.938
335.166	203.509
335.857	321.408
336.549	219.02
337.241	136.755
337.932	158.548
338.624	154.478
339.316	48.3386
340.007	150.364
340.699	188.808
341.391	137.97
342.082	176.331
342.774	97.956
343.466	80.2944
344.157	215.203
344.849	252.897
345.541	177.564
346.232	207.201
346.924	300.816
347.616	202.534
348.307	214.645
348.999	215.988
349.691	105.451
350.382	56.9092
351.074	165.105
351.766	130.545
352.457	194.301
353.149	230.744
353.841	179.093
354.532	99.3281
355.224	71.246
355.916	116.502
356.607	178.922
357.299	128.134
357.991	261.781
358.682	263.186
359.374	223.385
360.066	160.554
360.757	118.007
361.449	140.207
362.14	199.566
362.832	232.974
363.524	314.124
364.216	214.396
364.907	245.964
365.599	261.085
366.291	193.384
366.982	162.578
367.674	262.665
368.365	252.207
369.057	124.812
369.749	147.52
370.44	134.487
371.132	149.522
371.824	184.31
372.515	220.491
373.207	223.074
373.899	119.157
374.59	136.368
375.282	205.001
375.974	269.413
376.665	192.193
377.357	202.426
378.049	251.307
378.74	206.412
379.432	169.086
380.124	252.112
380.815	177.131
381.507	97.0006
382.199	256.734
382.89	185.067
383.582	107.231
384.274	150.404
384.965	154.411
385.657	174.313
386.349	145.556
387.04	208.954
387.732	206.423
388.424	92.1136
389.115	102.643
389.807	198.356
390.499	179.33
391.19	36.5124
391.882	79.5843
392.574	240.068
393.265	47.3524
393.957	40.9417
394.649	66.6815
395.34	81.2922
396.032	66.9495
396.724	48.9976
397.415	100.797
398.107	79.2045
398.799	110.624
399.49	232.946
400.182	120.02
400.874	90.814
401.565	111.189
402.257	101.309
402.949	84.9831
403.64	34.0485
404.332	50.8305
405.024	6.85485
405.715	94.6844
406.407	191.696
407.099	168.492
407.79	137.518
408.482	153.219
409.174	131.488
409.865	111.491
410.557	111.562
411.249	158.103
411.94	126.479
412.632	69.4866
413.324	133.5
414.015	186.198
414.707	126.806
415.399	70.5207
416.09	70.7654
416.782	32.4756
417.474	98.542
418.165	127.239
418.857	74.1013
419.549	87.3425
420.24	122.652
420.932	89.4478
421.624	53.7441
422.315	145.476
423.007	246.88
423.699	175.784
424.39	157.905
425.082	127.162
425.774	134.186
426.465	184.229
427.157	223.336
427.849	241.349
428.54	307.364
429.232	116.34
429.924	148.661
430.615	191.448
431.307	114.382
431.999	140.239
432.69	214.706
433.382	246.824
434.074	264.468
434.765	215.623
435.457	116.313
436.149	251.87
436.84	246.26
437.532	202.11
438.224	199.723
438.915	256.189
439.607	254.889
440.298	165.042
440.99	178.205
441.682	88.2903
442.373	-4.21814
443.065	166.384
443.757	341.229
444.448	314.618
445.14	201.061
445.832	190.032
446.523	236.781
447.215	146.828
447.907	121.443
448.598	156.372
449.29	302.204
449.982	195.391
450.673	182.725
451.365	188.784
452.057	225.247
452.748	273.457
453.44	219.541
454.132	155.557
454.823	256.992
455.515	149.966
456.207	173.725
456.898	158.276
457.59	58.7665
458.282	169.041
458.973	325.241
459.665	259.178
460.357	242.246
461.048	261.619
461.74	126.747
462.432	94.7234
463.123	109.018
463.815	204.783
464.507	281.666
465.198	271.247
465.89	226.778
466.582	197.335
467.273	106.608
467.965	159.982
468.657	168.52
469.348	238.681
470.04	233.781
470.732	207.457
471.423	254.23
472.115	267.839
472.807	215.058
473.498	247.62
474.19	243.581
474.882	241.659
475.573	293.235
476.265	267.601
476.957	286.842
477.648	294.495
478.34	242.973
479.032	230.195
479.723	289.859
480.415	274.859
481.107	270.437
481.798	312.912
482.49	319.394
483.182	163.952
483.873	185.595
484.565	230.085
485.257	279.557
485.948	269.062
486.64	198.231
487.332	296.482
488.023	353.491
488.715	222.59
489.407	350.797
490.098	372.509
490.79	333.94
491.482	252.04
492.173	260.064
492.865	338.491
493.557	328.107
494.248	246.824
494.94	309.743
495.632	319.863
496.323	198.158
497.015	200.195
497.707	288.107
498.398	305.336
499.09	242.246
499.782	197.652
500.473	219.647
501.165	256.239
501.857	283.09
502.548	209.582
503.24	314.076
503.932	276.688
504.623	188.056
505.315	262.171
506.007	304.141
506.698	260.991
507.39	281.408
508.082	335.28
508.773	214.154
509.465	198.556
510.157	319.092
510.848	173.165
511.54	179.395
512.232	226.084
512.923	262.06
513.615	262.843
514.307	235.544
514.998	236.491
515.69	275.121
516.382	206.857
517.073	251.574
517.765	233.487
518.456	242.513
519.148	195.494
519.84	196.437
520.531	245.049
521.223	275.671
521.915	222.076
522.607	111.504
523.298	199.016
523.99	212.341
524.681	271.208
525.373	270.204
526.065	190.671
526.756	269.666
527.448	278.167
528.14	202.386
528.831	186.184
529.523	215.364
530.215	208.047
530.906	205.937
531.598	351.801
532.29	285.165
532.981	304.446
533.673	371.908
534.365	314.986
535.056	233.579
535.748	223.16
536.44	253.622
537.131	280.808
537.823	296.687
538.515	275.978
539.206	218.258
539.898	248.759
540.59	253.405
541.281	170.864
541.973	178.804
542.665	246.725
543.356	285.881
544.048	284.221
544.74	237.206
545.431	156.98
546.123	329.581
546.815	174.283
547.506	250.843
548.198	238.389
548.89	273.513
549.581	311.253
550.273	316.464
550.965	317.219
551.656	336.318
552.348	319.02
553.04	207.897
553.731	251.44
554.423	131.201
555.115	216.927
555.806	260.701
556.498	202.776
557.19	231.474
557.881	270.59
558.573	266.27
559.265	285.151
559.956	311.333
560.648	235.43
561.34	214.013
562.031	329.73
562.723	274.148
563.415	281.724
564.106	197.58
564.798	147.181
565.49	153.661
566.181	234.818
566.873	319.71
567.565	309.465
568.256	289.18
568.948	355.776
569.64	356.765
570.331	333.117
571.023	270.546
571.715	249.591
572.406	323.14
573.098	315.065
573.79	214.467
574.481	182.716
575.173	255.05
575.865	304.29
576.556	342.299
577.248	369.187
577.94	318.628
578.631	339.694
579.323	299.392
580.015	292.954
580.706	296.978
581.398	317.345
582.09	285.108
582.781	230.665
583.473	236.979
584.165	251.271
584.856	257.621
585.548	299.382
586.24	415.289
586.931	235.668
587.623	270.415
588.315	313.225
589.006	279.779
589.698	302.741
590.39	309.645
591.081	236.381
591.773	215.089
592.464	314.04
593.156	403.356
593.848	370.003
594.539	292.527
595.231	320.392
595.923	274.023
596.615	301.149
597.306	382.018
597.998	285.104
598.689	198.391
599.381	323.783
600.073	450.94
600.764	361.409
601.456	261.574
602.148	278.088
602.839	370.259
603.531	394.075
604.223	401.278
604.914	352.575
605.606	385.988
606.298	400.875
606.989	317.908
607.681	302.052
608.373	379.826
609.064	327.043
609.756	257.281
610.448	279.479
611.139	300.305
611.831	412.732
612.523	324.416
613.214	308.028
613.906	260.092
614.598	366.444
615.289	341.914
615.981	284.466
616.673	273.321
617.364	209.97
618.056	341.004
618.748	332.001
619.439	348.416
620.131	289.568
620.823	328.581
621.514	502.49
622.206	451.763
622.898	383.048
623.589	315.731
624.281	290.222
624.973	301.597
625.664	335.743
626.356	367.173
627.048	292.384
627.739	346.909
628.431	437.692
629.123	263.241
629.814	330.303
630.506	270.181
631.198	295.527
631.889	293.571
632.581	248.284
633.273	263.454
633.964	327.655
634.656	370.45
635.348	385.851
636.039	346.999
636.731	297.727
637.423	369.948
638.114	262.903
638.806	392.384
639.498	398.853
640.189	335.97
640.881	307.449
641.573	396.071
642.264	437.322
642.956	378.442
643.648	351.161
644.339	349.874
645.031	283.041
645.723	369.197
646.414	413.75
647.106	256.433
647.798	257.098
648.489	353.432
649.181	315.061
649.873	311.171
650.564	342.643
651.256	391.609
651.948	391.843
652.639	400.195
653.331	439.732
654.023	369.168
654.714	303.758
655.406	446.474
656.098	349.642
656.789	436.492
657.481	376.203
658.173	399.567
658.864	334.188
659.556	347.94
660.248	346.367
660.939	354.141
661.631	411.126
662.323	388.158
663.014	318.851
663.706	391.558
664.398	352.302
665.089	312.152
665.781	355.304
666.473	388.937
667.164	444.199
667.856	365.121
668.547	382.906
669.239	338.877
669.931	397.126
670.622	459.687
671.314	465.149
672.006	417.309
672.698	331.393
673.389	303.463
674.081	340.424
674.772	438.796
675.464	417.705
676.156	364.089
676.847	310.46
677.539	380.727
678.231	350.078
678.922	338.704
679.614	409.623
680.306	456.3
680.997	443.813
681.689	422.67
682.381	419.805
683.072	405.411
683.764	369.993
684.456	398.517
685.147	422.345
685.839	391.785
686.531	454.148
687.222	418.071
687.914	408.474
688.606	390.205
689.297	361.351
689.989	323.75
690.681	408.224
691.372	466.562
692.064	415.235
692.756	405.356
693.447	446.207
694.139	420.447
694.831	411.282
695.522	406.859
696.214	454.6
696.906	434.769
697.597	303.509
698.289	303.948
698.981	230.84
699.672	274.831
700.364	299.693
701.056	369.746
701.747	406.573
702.439	378.912
703.131	336.155
703.822	311.024
704.514	379.622
705.206	380.974
705.897	292.973
706.589	416.532
707.281	397.061
707.972	316.105
708.664	358.559
709.356	437.345
710.047	348.821
710.739	389.6
711.431	419.623
712.122	372.277
712.814	331.152
713.506	380.923
714.197	386.636
714.889	287.337
715.581	364.619
716.272	341.012
716.964	335.101
717.656	389.775
718.347	474.877
719.039	419.362
719.731	390.322
720.422	427.456
721.114	431.685
721.806	370.18
722.497	314.679
723.189	299.168
723.881	309.469
724.572	348.916
725.264	379.484
725.956	399.023
726.647	485.593
727.339	461.25
728.031	287.189
728.722	343.211
729.414	420.026
730.106	410.194
730.797	353.45
731.489	461.493
732.181	313.963
732.872	364.017
733.564	304.259
734.256	323.203
734.947	396.053
735.639	400.807
736.331	379.709
737.022	370.724
737.714	407.163
738.406	473.92
739.097	377.597
739.789	262.035
740.481	250.272
741.172	478.119
741.864	333.429
742.556	406.634
743.247	438.777
743.939	295.754
744.63	321.614
745.322	389.569
746.014	341.744
746.706	350.883
747.397	380.083
748.089	354.223
748.781	320.464
749.472	320.498
750.164	402.205
750.855	362.089
751.547	324.639
752.239	345.859
752.93	403.18
753.622	367.713
754.314	268.51
755.005	350.888
755.697	376.517
756.389	331.574
757.08	336.326
757.772	317.06
758.464	328.98
759.155	361.607
759.847	377.159
760.539	355.942
761.23	365.67
761.922	400.926
762.614	329.865
763.305	355.224
763.997	266.011
764.689	281.936
765.38	362.679
766.072	391.971
766.764	250.814
767.455	401.852
768.147	325.919
768.839	313.706
769.53	385.98
770.222	372.492
770.914	287.907
771.605	336.966
772.297	373.203
772.989	332.022
773.68	315.599
774.372	334.514
775.064	375.441
775.755	350.18
776.447	327.662
777.139	397.208
777.83	388.869
778.522	296.955
779.214	323.227
779.905	355.161
780.597	265.917
781.289	374.433
781.98	353.191
782.672	236.12
783.364	225.777
784.055	367.657
784.747	381.35
785.439	302.957
786.13	290.305
786.822	294.715
787.514	308.945
788.205	333.888
788.897	292.219
789.589	308.041
790.28	247.291
790.972	316.14
791.664	277.166
792.355	193.429
793.047	279.761
793.739	318.523
794.43	279.468
795.122	313.773
795.814	281.566
796.505	150.88
797.197	245.346
797.889	377.815
798.58	377.886
799.272	293.437
799.964	292.28
800.655	334.302
801.347	329.154
802.039	332.503
802.73	325.819
803.422	274.954
804.114	291.895
804.805	290.306
805.497	296.299
806.189	317.382
806.88	376.053
807.572	336.18
808.264	249.386
808.955	330.423
809.647	317.666
810.339	260.768
811.03	287.237
811.722	297.28
812.414	347.941
813.105	333.512
813.797	295.209
814.489	340.154
815.18	293.987
815.872	304.826
816.564	358.991
817.255	276.123
817.947	266.61
818.638	325.397
819.33	301.882
820.022	304.392
820.713	293.515
821.405	255.962
822.097	194.906
822.789	268.827
823.48	272.568
824.172	257.918
824.863	293.916
825.555	310.57
826.247	281.408
826.938	285.211
827.63	314.727
828.322	305.36
829.013	257.422
829.705	300.639
830.397	263.942
831.088	260.308
831.78	211.024
832.472	234.379
833.163	247.004
833.855	293.488
834.547	270.243
835.238	232.398
835.93	305.154
836.622	300.468
837.313	241.819
838.005	224.73
838.697	296.194
839.388	259.252
840.08	232.82
840.772	269.041
841.463	251.555
842.155	197.988
842.847	233.813
843.538	232.956
844.23	284.089
844.922	297.959
845.613	255.085
846.305	221.109
846.997	267.955
847.688	230.562
848.38	268.839
849.072	271.744
849.763	252.947
850.455	246.194
851.147	236.68
851.838	221.058
852.53	233.367
853.222	262.024
853.913	226.84
854.605	281.049
855.297	263.431
855.988	284.718
856.68	267.884
857.372	337.563
858.063	234.545
858.755	211.836
859.447	220.221
860.138	214.94
860.83	227.859
861.522	172.005
862.213	235.943
862.905	216.41
863.597	213.146
864.288	269.85
864.98	301.664
865.672	255.435
866.363	222.947
867.055	252.163
867.747	248.386
868.438	241.601
869.13	289.176
869.822	306.757
870.513	277.505
871.205	248.57
871.897	270.685
872.588	262.271
873.28	254.828
873.972	252.076
874.663	321.81
875.355	178.405
876.047	192.817
876.738	171.98
877.43	169.649
878.122	238.088
878.813	286.077
879.505	269.815
880.197	239.083
880.888	127.134
881.58	245.48
882.272	233.458
882.963	193.453
883.655	214.6
884.347	196.442
885.038	205.037
885.73	204.102
886.422	178.692
887.113	244.667
887.805	285.758
888.497	215.944
889.188	191.731
889.88	251.898
890.572	245.912
891.263	262.848
891.955	272.34
892.647	276.963
893.338	250.498
894.03	231.225
894.721	205.279
895.413	183.057
896.105	227.178
896.797	213.601
897.488	281.914
898.18	228.89
898.872	173.862
899.563	194.82
900.255	202.202
900.946	179.009
901.638	235.936
902.33	227.154
903.021	148.477
903.713	81.5487
904.405	86.2889
905.096	123.919
905.788	151.421
906.48	190.42
907.171	200.8
907.863	230.136
908.555	236.303
909.246	192.31
909.938	261.782
910.63	246.382
911.321	193.434
912.013	211.224
912.705	160.723
913.396	157.209
914.088	226.622
914.78	184.915
915.471	242.251
916.163	187.296
916.855	269.311
917.546	255.12
918.238	193.173
918.93	223.045
919.621	182.32
920.313	153.885
921.005	108.277
921.696	111.574
922.388	166.103
923.08	198.992
923.771	222.215
924.463	250.293
925.155	168.03
925.846	85.6822
926.538	182.766
927.23	254.223
927.921	211.729
928.613	198.063
929.305	133.413
929.996	137.679
930.688	202.625
931.38	212.638
932.071	226.935
932.763	226.896
933.455	189.597
934.146	226.603
934.838	194.333
935.53	142.575
936.221	128.736
936.913	167.287
937.605	169.278
938.296	120.464
938.988	179.04
939.68	186.22
940.371	102.917
941.063	94.9973
941.755	173.066
942.446	144.818
943.138	167.102
943.83	157.522
944.521	211.115
945.213	202.478
945.905	180.136
946.596	202.605
947.288	170.71
947.98	147.33
948.671	187.455
949.363	191.347
950.055	169.329
950.746	185.298
951.438	222.331
952.13	224.184
952.821	170.004
953.513	159.421
954.205	205.296
954.896	246.349
955.588	204.671
956.28	249.07
956.971	244.037
957.663	212.995
958.355	298.043
959.046	293.76
959.738	337.361
960.43	316.936
961.121	354.066
961.813	364.99
962.505	258.621
963.196	311.797
963.888	269.816
964.58	326.543
965.271	155.542
965.963	273.754
966.655	245.782
967.346	303.29
968.038	223.022
968.73	156.844
969.421	167.929
970.113	216.944
970.804	217.517
971.496	186.626
972.188	114.644
972.88	146.592
973.571	181.742
974.263	154.153
974.954	129.755
975.646	160.949
976.338	183.603
977.029	138.008
977.721	147.39
978.413	175.086
979.104	158.703
979.796	205.678
980.488	197.766
981.179	135.245
981.871	190.464
982.563	217.902
983.254	168.981
983.946	98.4188
984.638	118.906
985.329	149.887
986.021	178.475
986.713	180.516
987.404	147.499
988.096	175.444
988.788	160.226
989.479	146.146
990.171	167.973
990.863	136.049
991.554	171.184
992.246	132.265
992.938	227.982
993.629	153.066
994.321	163.708
995.013	191.462
995.704	126.951
996.396	155.897
997.088	104.436
997.779	203.624
998.471	168.12
999.163	129.511
999.854	133.063
1000.55	148.981
1001.24	126.855
1001.93	129.43
1002.62	154.653
1003.31	177.788
1004	181.677
1004.7	158.695
1005.39	180.435
1006.08	118.984
1006.77	136.449
1007.46	201.99
1008.15	111.045
1008.85	125.617
1009.54	189.597
1010.23	97.8331
1010.92	142.467
1011.61	192.819
1012.3	163.279
1013	199.475
1013.69	182.909
1014.38	144.86
1015.07	176.018
1015.76	149.617
1016.45	110.744
1017.15	166.896
1017.84	216.526
1018.53	201.893
1019.22	170.954
1019.91	176.148
1020.6	164.001
1021.3	152.073
1021.99	174.227
1022.68	119.843
1023.37	144.951
1024.06	166.705
1024.75	153.933
1025.45	140.886
1026.14	254.867
1026.83	239.127
1027.52	196.783
1028.21	168.456
1028.9	169.941
1029.6	142.536
1030.29	159.25
1030.98	136.967
1031.67	153.438
1032.36	184.991
1033.05	208.99
1033.75	244.687
1034.44	197.59
1035.13	194.844
1035.82	227.389
1036.51	170.645
1037.2	225.105
1037.9	218.435
1038.59	234.851
1039.28	211.611
1039.97	287.254
1040.66	337.164
1041.35	176.78
1042.05	164.776
1042.74	260.071
1043.43	179.381
1044.12	179.346
1044.81	260.321
1045.5	203.683
1046.2	198.764
1046.89	173.039
1047.58	230.33
1048.27	245.859
1048.96	195.748
1049.65	236.721
1050.35	95.1103
1051.04	179.409
1051.73	100.979
1052.42	108.72
1053.11	262.093
1053.8	207.076
1054.5	199.059
1055.19	199.849
1055.88	196.447
1056.57	188.15
1057.26	185.416
1057.95	270.02
1058.65	282.32
1059.34	262.629
1060.03	221.877
1060.72	216.404
1061.41	301.609
1062.1	307.611
1062.8	260.875
1063.49	247.661
1064.18	261.596
1064.87	223.383
1065.56	323.985
1066.25	292.228
1066.95	315.638
1067.64	318.836
1068.33	369.285
1069.02	323.66
1069.71	342.4
1070.4	343.862
1071.1	275.167
1071.79	362.888
1072.48	345.126
1073.17	369.79
1073.86	416.612
1074.55	399.115
1075.25	391.221
1075.94	437.97
1076.63	461.948
1077.32	446.38
1078.01	475.23
1078.7	476.189
1079.4	418.638
1080.09	374.999
1080.78	384.878
1081.47	441.984
1082.16	386.142
1082.85	370.092
1083.55	338.62
1084.24	381.432
1084.93	444.151
1085.62	381.96
1086.31	410.658
1087	397.695
1087.7	433.307
1088.39	430.997
1089.08	440.469
1089.77	457.598
1090.46	464.243
1091.15	432.343
1091.85	419.156
1092.54	468.037
1093.23	443.495
1093.92	425.951
1094.61	407.528
1095.3	474.957
1096	525.614
1096.69	532.862
1097.38	534.007
1098.07	545.927
1098.76	439.562
1099.45	532.494
1100.15	529.248
1100.84	498.927
1101.53	580.721
1102.22	527.422
1102.91	464.725
1103.6	546.259
1104.3	523.532
1104.99	534.59
1105.68	569.362
1106.37	558.701
1107.06	568.41
1107.75	642.715
1108.45	586.754
1109.14	584.165
1109.83	598.764
1110.52	721.834
1111.21	688.838
1111.9	698.143
1112.6	714.86
1113.29	627.08
1113.98	690.718
1114.67	691.188
1115.36	655.522
1116.05	652.104
1116.75	699.448
1117.44	720.29
1118.13	783.843
1118.82	684.677
1119.51	746.103
1120.2	734.049
1120.9	784.318
1121.59	736.471
1122.28	783.696
1122.97	762.638
1123.66	767.651
1124.35	750.931
1125.05	851.53
1125.74	823.637
1126.43	898.831
1127.12	825.29
1127.81	830.076
1128.5	883.633
1129.2	904.126
1129.89	891.722
1130.58	905.047
1131.27	911.308
1131.96	903.621
1132.65	877.081
1133.35	921.756
1134.04	934.974
1134.73	929.007
1135.42	1057.36
1136.11	917.381
1136.8	1035.7
1137.5	1039.42
1138.19	1095.22
1138.88	983.528
1139.57	1075.06
1140.26	1110.97
1140.95	1077.94
1141.65	1064.5
1142.34	1123.32
1143.03	1132.69
1143.72	1152.08
1144.41	1205.32
1145.1	1141.9
1145.8	1203.7
1146.49	1156.57
1147.18	1142.87
1147.87	1213.84
1148.56	1260.51
1149.25	1181.31
1149.95	1169.3
1150.64	1157.1
1151.33	1250.71
1152.02	1244.28
1152.71	1316.21
1153.4	1381.95
1154.1	1317.54
1154.79	1400.87
1155.48	1416.97
1156.17	1357.41
1156.86	1406.83
1157.55	1504.53
1158.25	1421.63
1158.94	1436.82
1159.63	1511.81
1160.32	1559.8
1161.01	1629.79
1161.7	1653.9
1162.4	1649.35
1163.09	1696.32
1163.78	1754.5
1164.47	1741.48
1165.16	1792.89
1165.85	1799.12
1166.55	1764.93
1167.24	1812.49
1167.93	1892.47
1168.62	1908.95
1169.31	1971.36
1170	2041.44
1170.7	1998.36
1171.39	2057.53
1172.08	2110.26
1172.77	2082.85
1173.46	2127.98
1174.15	2180.73
1174.85	2240.67
1175.54	2287.43
1176.23	2371.18
1176.92	2495.2
1177.61	2547.67
1178.3	2565.25
1179	2614.2
1179.69	2680.49
1180.38	2731.26
1181.07	2884.54
1181.76	2857.69
1182.45	2933.12
1183.15	3025.46
1183.84	3114.17
1184.53	3120.99
1185.22	3248.91
1185.91	3219.63
1186.6	3365.17
1187.3	3483.51
1187.99	3578.5
1188.68	3564.74
1189.37	3687.82
1190.06	3824.05
1190.75	3891.24
1191.45	4079.5
1192.14	4079.93
1192.83	4049.27
1193.52	4230.01
1194.21	4448.77
1194.9	4421.51
1195.6	4448.41
1196.29	4695.82
1196.98	4757.26
1197.67	4879.69
1198.36	4957.56
1199.05	5019.8
1199.75	5039.31
1200.44	5187.9
1201.13	5171.37
1201.82	5302.61
1202.51	5412.36
1203.2	5413.91
1203.9	5383.74
1204.59	5464.89
1205.28	5537.47
1205.97	5553.79
1206.66	5637.93
1207.35	5630.66
1208.05	5580.94
1208.74	5601
1209.43	5558.55
1210.12	5501.12
1210.81	5615.9
1211.5	5619.25
1212.2	5517.13
1212.89	5439.23
1213.58	5446.95
1214.27	5254.83
1214.96	5395.64
1215.65	5420.02
1216.35	5394.14
1217.04	5267.53
1217.73	5241.6
1218.42	5201.57
1219.11	5166.84
1219.8	5034.57
1220.5	5037.27
1221.19	5040.85
1221.88	5077.47
1222.57	5085.25
1223.26	4892.11
1223.95	4865.78
1224.64	4893.15
1225.34	4804.52
1226.03	4740.72
1226.72	4839.95
1227.41	4712.81
1228.1	4690.28
1228.8	4640.93
1229.49	4644.25
1230.18	4577.23
1230.87	4552.33
1231.56	4571.03
1232.25	4555.6
1232.95	4586.4
1233.64	4482.66
1234.33	4441.2
1235.02	4490.23
1235.71	4494.16
1236.4	4377.97
1237.1	4395.15
1237.79	4376.68
1238.48	4256.16
1239.17	4299.54
1239.86	4323.62
1240.55	4237.73
1241.24	4190.02
1241.94	4213.61
1242.63	4179.87
1243.32	4206.99
1244.01	4098.26
1244.7	4088.29
1245.39	4141.56
1246.09	4080.08
1246.78	4116.87
1247.47	3964.81
1248.16	3990.27
1248.85	4058.93
1249.54	3929.7
1250.24	3869.13
1250.93	3894.67
1251.62	3948.95
1252.31	3840.4
1253	4057.09
1253.69	3998.73
1254.39	3911.06
1255.08	3977.32
1255.77	4021.05
1256.46	4071.73
1257.15	4046.85
1257.85	3982.17
1258.54	4007.26
1259.23	4060.61
1259.92	4113.85
1260.61	4106.63
1261.3	4127.54
1261.99	4224.98
1262.69	4226.51
1263.38	4292.92
1264.07	4292.3
1264.76	4268.79
1265.45	4424.64
1266.14	4421.7
1266.84	4442.4
1267.53	4548.36
1268.22	4542.62
1268.91	4595.67
1269.6	4682.03
1270.29	4763.93
1270.99	4815.86
1271.68	4837.05
1272.37	4911.87
1273.06	5093.37
1273.75	5100.12
1274.44	5015.85
1275.14	5071.71
1275.83	5205.69
1276.52	5124.53
1277.21	5239.12
1277.9	5470.36
1278.59	5514.81
1279.29	5498.17
1279.98	5483.7
1280.67	5528.7
1281.36	5546.61
1282.05	5748.08
1282.74	5886.7
1283.44	5801.36
1284.13	5808.61
1284.82	5865.2
1285.51	5948.52
1286.2	6020.51
1286.89	5910.11
1287.59	6099.69
1288.28	6158.98
1288.97	6172.18
1289.66	6153.22
1290.35	6064.91
1291.04	6151.29
1291.74	6119.37
1292.43	6161.41
1293.12	6246.98
1293.81	6189.95
1294.5	6153.26
1295.19	6177.05
1295.89	6191.93
1296.58	6173.06
1297.27	6164.13
1297.96	6161.75
1298.65	6111.79
1299.34	6090.17
1300.04	6120.59
1300.73	6044.6
1301.42	5887.41
1302.11	6070.83
1302.8	6072.17
1303.49	5833.05
1304.19	5770.35
1304.88	5657.02
1305.57	5823.9
1306.26	5603.1
1306.95	5578.36
1307.64	5700.77
1308.34	5562.01
1309.03	5526.08
1309.72	5536.15
1310.41	5385.49
1311.1	5276.76
1311.79	5231.21
1312.49	5252.19
1313.18	5239.21
1313.87	5260.93
1314.56	5131.86
1315.25	5091.23
1315.94	5121.71
1316.64	5047.62
1317.33	4943.5
1318.02	5041.23
1318.71	4904.09
1319.4	4791.2
1320.09	4904.48
1320.79	4826.58
1321.48	4819.34
1322.17	4925.99
1322.86	4711.36
1323.55	4645.03
1324.24	4761.76
1324.94	4788.28
1325.63	4720.04
1326.32	4749.25
1327.01	4803.76
1327.7	4766.63
1328.39	4673.99
1329.09	4688.53
1329.78	4657.36
1330.47	4600.1
1331.16	4564.19
1331.85	4570
1332.54	4700.7
1333.24	4630.8
1333.93	4604.24
1334.62	4483.7
1335.31	4429.29
1336	4402.58
1336.69	4402.33
1337.39	4395.01
1338.08	4361.09
1338.77	4337.91
1339.46	4243.33
1340.15	4250.02
1340.84	4274.16
1341.54	4256.34
1342.23	4158.35
1342.92	4110.04
1343.61	3962.99
1344.3	3923.12
1344.99	3890.66
1345.69	3862.13
1346.38	3795.17
1347.07	3778.33
1347.76	3663.86
1348.45	3564.27
1349.14	3508.47
1349.84	3584.46
1350.53	3393.5
1351.22	3382.39
1351.91	3378.38
1352.6	3336.63
1353.29	3291.57
1353.99	3281.95
1354.68	3226.95
1355.37	3218.34
1356.06	3247.88
1356.75	3162.71
1357.44	3027.78
1358.14	2979.8
1358.83	3017.33
1359.52	2889.04
1360.21	2859.03
1360.9	2743.45
1361.59	2690.95
1362.29	2769.57
1362.98	2759.97
1363.67	2738.41
1364.36	2710.31
1365.05	2694.47
1365.74	2633.45
1366.44	2577.97
1367.13	2656.41
1367.82	2641.87
1368.51	2557.98
1369.2	2531.81
1369.89	2569.66
1370.59	2546.69
1371.28	2463.26
1371.97	2518.88
1372.66	2481.32
1373.35	2450.75
1374.04	2416.34
1374.74	2381.53
1375.43	2420.77
1376.12	2445.87
1376.81	2317.19
1377.5	2421.6
1378.19	2322.88
1378.89	2360.4
1379.58	2378.52
1380.27	2300.44
1380.96	2354.84
1381.65	2442.61
1382.34	2357.03
1383.04	2341.58
1383.73	2465.78
1384.42	2450.76
1385.11	2394.13
1385.8	2395.91
1386.49	2355.75
1387.19	2417.19
1387.88	2484.54
1388.57	2526.72
1389.26	2516.13
1389.95	2523.91
1390.64	2596.72
1391.34	2563.23
1392.03	2581.99
1392.72	2572.12
1393.41	2562.43
1394.1	2576.65
1394.79	2641.14
1395.49	2627.66
1396.18	2591.75
1396.87	2679.08
1397.56	2726.14
1398.25	2711.5
1398.94	2768.63
1399.64	2837.41
1400.33	2729.43
1401.02	2811.95
1401.71	2863.85
1402.4	2843.49
1403.09	2842.7
1403.79	2880.78
1404.48	2918.79
1405.17	2955.23
1405.86	3015.03
1406.55	2998.62
1407.24	2970.2
1407.94	3033.94
1408.63	3117.04
1409.32	3146.61
1410.01	3158.91
1410.7	3113.23
1411.39	3233.11
1412.09	3149.3
1412.78	3190.23
1413.47	3254.08
1414.16	3251.04
1414.85	3238.99
1415.54	3296.89
1416.24	3322.52
1416.93	3311.34
1417.62	3310.41
1418.31	3314.15
1419	3317.06
1419.69	3327.11
1420.39	3439.21
1421.08	3289.2
1421.77	3320.25
1422.46	3306.23
1423.15	3407.47
1423.84	3349.36
1424.54	3289.28
1425.23	3376.55
1425.92	3338.42
1426.61	3336.9
1427.3	3315.13
1427.99	3289.89
1428.69	3282.14
1429.38	3310.74
1430.07	3279.67
1430.76	3265.85
1431.45	3324.18
1432.14	3321.98
1432.84	3267.51
1433.53	3241.52
1434.22	3212.75
1434.91	3278.59
1435.6	3191.82
1436.29	3205.35
1436.99	3218.66
1437.68	3163.38
1438.37	3184.67
1439.06	3152.59
1439.75	3045.37
1440.44	3034.3
1441.14	3054.39
1441.83	2994.17
1442.52	3008.37
1443.21	2936.81
1443.9	2889.88
1444.59	2889.42
1445.29	2793.18
1445.98	2777.48
1446.67	2799.56
1447.36	2698.24
1448.05	2635.63
1448.74	2628
1449.44	2640.54
1450.13	2614.35
1450.82	2604.81
1451.51	2556.93
1452.2	2493.6
1452.89	2532.9
1453.59	2558.47
1454.28	2539.41
1454.97	2535.73
1455.66	2555.23
1456.35	2459.31
1457.04	2514.89
1457.74	2572.28
1458.43	2515.89
1459.12	2541.93
1459.81	2519.2
1460.5	2542.78
1461.19	2491.76
1461.89	2503.45
1462.58	2491.03
1463.27	2471.47
1463.96	2454.5
1464.65	2564.84
1465.34	2497.98
1466.04	2475.38
1466.73	2498.46
1467.42	2553.06
1468.11	2518.49
1468.8	2552.36
1469.49	2544.11
1470.19	2499.59
1470.88	2505.78
1471.57	2498.56
1472.26	2530
1472.95	2554.09
1473.64	2590.03
1474.34	2574.55
1475.03	2470.56
1475.72	2521.29
1476.41	2440.72
1477.1	2560.6
1477.79	2574.32
1478.49	2542.99
1479.18	2544.8
1479.87	2535.47
1480.56	2474.35
1481.25	2543.12
1481.94	2580.27
1482.64	2597.81
[truncated: 748 more rows]

## Sheet: VTL1_784_pos7_transareaWredsp2
100	95.5554
100.692	158.707
101.383	155.094
102.075	119.849
102.767	116.829
103.458	126.434
104.15	99.3629
104.842	36.1679
105.533	105.518
106.225	112.876
106.917	81.3046
107.608	68.1402
108.3	105.49
108.992	161.189
109.683	98.0842
110.375	117.54
111.067	124.467
111.758	156.607
112.45	161.602
113.142	61.7954
113.833	96.1109
114.525	86.012
115.217	125.541
115.908	114.337
116.6	109.976
117.292	160.306
117.983	95.8183
118.675	88.2689
119.367	143.032
120.058	113.124
120.75	85.5617
121.442	120.627
122.133	144.748
122.825	57.3158
123.517	109.443
124.208	118.955
124.9	144.881
125.592	138.608
126.283	51.9527
126.975	122.909
127.667	77.8087
128.358	126.252
129.05	82.2554
129.742	53.4184
130.433	119.026
131.125	146.043
131.817	161.584
132.508	128.636
133.2	109.599
133.892	110.107
134.583	112.276
135.275	108.386
135.967	158.331
136.658	147.007
137.35	133.238
138.042	136.612
138.733	145.521
139.425	147.7
140.116	151.223
140.808	166.3
141.5	151.628
142.191	151.646
142.883	116.264
143.575	102.813
144.266	169.685
144.958	82.7455
145.65	65.9658
146.341	119.736
147.033	123.036
147.725	99.7904
148.416	97.0714
149.108	105.04
149.8	89.6351
150.491	81.4223
151.183	108.281
151.875	134.391
152.566	134.198
153.258	110.702
153.95	98.591
154.641	114.008
155.333	105.205
156.025	91.0337
156.716	96.0365
157.408	97.6763
158.1	60.9115
158.791	136.664
159.483	137.039
160.175	99.7487
160.866	91.8513
161.558	79.9696
162.25	48.0833
162.941	85.1314
163.633	126.708
164.325	176.091
165.016	123.995
165.708	120.46
166.4	172.135
167.091	170.403
167.783	102.56
168.475	89.7484
169.166	119.296
169.858	151.421
170.55	180.984
171.241	167.763
171.933	80.1954
172.625	133.862
173.316	123.876
174.008	120.254
174.7	124.108
175.391	100.565
176.083	67.4772
176.775	112.279
177.466	108.021
178.158	97.9818
178.85	75.6317
179.541	62.5023
180.233	62.4158
180.925	68.7341
181.616	81.3728
182.308	97.0286
183	104.2
183.691	109.791
184.383	71.4941
185.075	50.2326
185.766	122.654
186.458	176.406
187.15	105.058
187.841	116.045
188.533	130.475
189.225	125.022
189.916	112.377
190.608	115.687
191.3	129.959
191.991	85.3435
192.683	38.2887
193.375	44.7986
194.066	72.449
194.758	100.446
195.45	131.867
196.141	59.0333
196.833	42.2083
197.525	79.1673
198.216	92.546
198.908	118.979
199.6	163.302
200.291	149.708
200.983	113.327
201.675	79.4334
202.366	28.8378
203.058	108.189
203.75	168.76
204.441	119.167
205.133	111.964
205.825	111.839
206.516	44.1583
207.208	96.2256
207.9	144.139
208.591	107.162
209.283	43.3603
209.975	101.747
210.666	111.424
211.358	86.1692
212.05	98.7001
212.741	150.181
213.433	162.69
214.125	111.736
214.816	93.2419
215.508	156.445
216.199	149.337
216.891	107.744
217.583	110.664
218.274	84.393
218.966	43.6964
219.658	151.554
220.349	128.403
221.041	171.819
221.733	148.055
222.424	122.314
223.116	94.9592
223.808	80.7829
224.499	127.689
225.191	128.347
225.883	152.18
226.574	146.692
227.266	128.711
227.958	97.4963
228.649	90.3379
229.341	146.194
230.033	101.919
230.724	89.2054
231.416	111.775
232.108	101.157
232.799	109.638
233.491	135.974
234.183	120.582
234.874	131.358
235.566	134.712
236.258	142.663
236.949	151.104
237.641	168.222
238.333	162.151
239.024	114.536
239.716	120.234
240.408	103.83
241.099	116.182
241.791	162.401
242.483	149.671
243.174	101.134
243.866	92.7349
244.558	112.144
245.249	112.768
245.941	104.956
246.633	139.393
247.324	129.261
248.016	118.633
248.708	145.85
249.399	141.572
250.091	145.365
250.783	150.574
251.474	152.395
252.166	172.049
252.858	175.096
253.549	169.836
254.241	199.919
254.933	194.083
255.624	167.462
256.316	192.323
257.008	174.471
257.699	150.133
258.391	162.297
259.083	190.051
259.774	148.396
260.466	176.874
261.158	205.051
261.849	155.179
262.541	154.149
263.233	182.188
263.924	192.746
264.616	225.167
265.308	216.538
265.999	158.932
266.691	184.554
267.383	155.369
268.074	148.633
268.766	189.931
269.458	195.401
270.149	152.027
270.841	193.076
271.533	181.422
272.224	153.903
272.916	179.926
273.608	215.59
274.299	191.2
274.991	139.01
275.683	198.093
276.374	191.961
277.066	181.691
277.758	173.621
278.449	170.034
279.141	166.457
279.833	159.726
280.524	165.171
281.216	163.946
281.908	175.017
282.599	127.156
283.291	119.833
283.983	146.24
284.674	149.447
285.366	137.354
286.058	156.793
286.749	164.917
287.441	171.589
288.133	189.991
288.824	198.919
289.516	205.155
290.207	211.059
290.899	145.389
291.591	125.476
292.283	167.022
292.974	157.075
293.666	156.897
294.357	191.038
295.049	211.553
295.741	182.177
296.432	269.996
297.124	215.658
297.816	182.122
298.507	181.49
299.199	188.302
299.891	183.033
300.582	173.874
301.274	179.101
301.966	121.58
302.657	187.363
303.349	166.936
304.041	171.029
304.732	192.313
305.424	185.028
306.116	150.534
306.807	158.818
307.499	132.119
308.191	145.669
308.882	154.713
309.574	107.136
310.266	109.711
310.957	146.243
311.649	112.296
312.341	165.179
313.032	146.752
313.724	84.32
314.416	133.587
315.107	173.861
315.799	146.174
316.491	106.242
317.182	134.872
317.874	165.697
318.566	162.202
319.257	145.029
319.949	86.6214
320.641	107.134
321.332	141.902
322.024	121.601
322.716	112.592
323.407	116.286
324.099	78.1851
324.791	80.0602
325.482	100.096
326.174	101.275
326.866	81.4134
327.557	64.891
328.249	73.0179
328.941	99.8438
329.632	67.063
330.324	39.0877
331.016	32.0083
331.707	66.1213
332.399	77.8483
333.091	47.7158
333.782	52.3687
334.474	36.4792
335.166	87.8515
335.857	83.1477
336.549	74.3955
337.241	51.1326
337.932	44.1729
338.624	68.7668
339.316	81.6272
340.007	63.9316
340.699	128.864
341.391	53.1559
342.082	22.9292
342.774	74.7815
343.466	81.5254
344.157	29.557
344.849	64.0929
345.541	110.489
346.232	26.4243
346.924	51.4852
347.616	96.0971
348.307	122.125
348.999	103.464
349.691	72.5744
350.382	83.2507
351.074	92.9186
351.766	78.8299
352.457	72.6877
353.149	41.1626
353.841	77.5585
354.532	101.004
355.224	90.8713
355.916	87.7075
356.607	34.4552
357.299	101.309
357.991	107.44
358.682	96.3324
359.374	101.216
360.066	115.448
360.757	140.692
361.449	159.512
362.14	123.154
362.832	84.5702
363.524	102.316
364.216	119.522
364.907	121.625
365.599	125.982
366.291	125.65
366.982	107.853
367.674	81.2701
368.365	71.116
369.057	90.6784
369.749	131.875
370.44	110.899
371.132	108.021
371.824	102.758
372.515	106.519
373.207	149.41
373.899	163.734
374.59	163.971
375.282	139.203
375.974	96.5025
376.665	103.666
377.357	140.902
378.049	149.877
378.74	128.126
379.432	133.485
380.124	132.604
380.815	106.686
381.507	94.7375
382.199	186.784
382.89	151.361
383.582	143.197
384.274	178.694
384.965	121.234
385.657	100.146
386.349	126.097
387.04	134.011
387.732	122.332
388.424	135.872
389.115	156.353
389.807	174.342
390.499	170.658
391.19	134.812
391.882	144.643
392.574	94.5372
393.265	159.19
393.957	118.898
394.649	132.226
395.34	136.901
396.032	145.69
396.724	175.166
397.415	112.619
398.107	82.324
398.799	187.971
399.49	139.924
400.182	103.398
400.874	124.881
401.565	124.572
402.257	138.21
402.949	201.446
403.64	136.927
404.332	149.683
405.024	194.348
405.715	138.58
406.407	132.637
407.099	129.654
407.79	106.258
408.482	110.793
409.174	165.629
409.865	167.511
410.557	130.316
411.249	138.017
411.94	109.255
412.632	119.936
413.324	141.401
414.015	166.064
414.707	172.295
415.399	145.708
416.09	174.888
416.782	160.385
417.474	144.755
418.165	159.653
418.857	142.786
419.549	145.054
420.24	131.295
420.932	114.224
421.624	171.909
422.315	207.461
423.007	116.43
423.699	178.644
424.39	176.296
425.082	152.461
425.774	148.081
426.465	172.15
427.157	180.052
427.849	153.739
428.54	193.24
429.232	146.944
429.924	162.048
430.615	174.752
431.307	156.293
431.999	184.959
432.69	191.343
433.382	165.934
434.074	187.907
434.765	204.327
435.457	245.121
436.149	173.32
436.84	191.381
437.532	171.974
438.224	183.745
438.915	187.341
439.607	173.208
440.298	171.236
440.99	151.552
441.682	190.301
442.373	46.1988
443.065	178.198
443.757	149.311
444.448	99.1231
445.14	142.74
445.832	217.068
446.523	213.335
447.215	164.269
447.907	215.945
448.598	125.475
449.29	174.957
449.982	183.16
450.673	206.892
451.365	199.297
452.057	178.252
452.748	162.793
453.44	151.209
454.132	204.212
454.823	206.844
455.515	171.09
456.207	190.012
456.898	214.636
457.59	199.268
458.282	176.431
458.973	179.963
459.665	194.364
460.357	185.099
461.048	168.216
461.74	178.972
462.432	231.895
463.123	220.366
463.815	192.077
464.507	218.278
465.198	234.739
465.89	214.558
466.582	236.91
467.273	292.238
467.965	205.027
468.657	154.181
469.348	186.286
470.04	197.213
470.732	206.579
471.423	218.066
472.115	212.412
472.807	208.201
473.498	234.593
474.19	210.356
474.882	186.946
475.573	162.345
476.265	214.026
476.957	208.779
477.648	239.79
478.34	234.192
479.032	200.003
479.723	215.703
480.415	231.708
481.107	196.076
481.798	230.993
482.49	209.662
483.182	184.408
483.873	218.374
484.565	232.855
485.257	232.688
485.948	232.63
486.64	211.682
487.332	177.247
488.023	175.864
488.715	150.475
489.407	227.001
490.098	224.55
490.79	220.527
491.482	199.417
492.173	189.565
492.865	217.64
493.557	225.161
494.248	147.45
494.94	149.518
495.632	202.714
496.323	230.45
497.015	212.338
497.707	184.77
498.398	201.262
499.09	206.369
499.782	192.825
500.473	205.134
501.165	206.985
501.857	130.626
502.548	178.156
503.24	220.105
503.932	205.463
504.623	226.784
505.315	245.091
506.007	233.923
506.698	246.21
507.39	263.21
508.082	205.886
508.773	209.976
509.465	173.013
510.157	172.688
510.848	147.643
511.54	211.769
512.232	185.049
512.923	153.768
513.615	159.869
514.307	178.831
514.998	194.404
515.69	166.066
516.382	168.943
517.073	181.522
517.765	207.268
518.456	221.814
519.148	191.744
519.84	206.642
520.531	222.099
521.223	186.898
521.915	151.583
522.607	166.048
523.298	150.055
523.99	115.12
524.681	166.317
525.373	169.59
526.065	174.552
526.756	213.225
527.448	207.518
528.14	181.388
528.831	172
529.523	154.476
530.215	152.391
530.906	193.549
531.598	102.748
532.29	115.576
532.981	194.949
533.673	221.502
534.365	236.067
535.056	183.965
535.748	164.183
536.44	219.479
537.131	207.206
537.823	172.785
538.515	183.588
539.206	202.454
539.898	187.559
540.59	148.233
541.281	174.734
541.973	216.864
542.665	234.364
543.356	223.58
544.048	200.293
544.74	186.526
545.431	192.869
546.123	211.21
546.815	138.274
547.506	158.221
548.198	139.696
548.89	179.356
549.581	175.413
550.273	165.512
550.965	184.522
551.656	192.934
552.348	177.554
553.04	172.839
553.731	184.644
554.423	165.596
555.115	177.961
555.806	160.943
556.498	186.107
557.19	167.847
557.881	158.06
558.573	149.554
559.265	147.953
559.956	184.152
560.648	140.959
561.34	185.743
562.031	196.369
562.723	123.78
563.415	128.021
564.106	169.384
564.798	151.721
565.49	157.995
566.181	169.123
566.873	148.253
567.565	153.944
568.256	186.745
568.948	123.781
569.64	152.412
570.331	201.097
571.023	154.831
571.715	206.74
572.406	196.278
573.098	190.366
573.79	158.399
574.481	123.525
575.173	126.737
575.865	119.823
576.556	132.198
577.248	171.894
577.94	184.954
578.631	129.058
579.323	174.906
580.015	158.381
580.706	144.105
581.398	144.019
582.09	142.217
582.781	141.885
583.473	160.928
584.165	198.385
584.856	214.656
585.548	198.685
586.24	156.804
586.931	130.649
587.623	132.101
588.315	180.889
589.006	185.239
589.698	156.614
590.39	152.546
591.081	164.601
591.773	159.403
592.464	151.029
593.156	127.772
593.848	158.658
594.539	136.584
595.231	126.379
595.923	162.35
596.615	141.272
597.306	159.704
597.998	159.136
598.689	161.44
599.381	180.926
600.073	189.166
600.764	193.545
601.456	110.868
602.148	139.027
602.839	158.49
603.531	167.032
604.223	161.976
604.914	185.841
605.606	162.205
606.298	169.777
606.989	172.514
607.681	153.772
608.373	144.202
609.064	128.707
609.756	145.777
610.448	168.151
611.139	169.858
611.831	135.078
612.523	194.634
613.214	159.287
613.906	139.941
614.598	142.763
615.289	150.278
615.981	167.829
616.673	173.13
617.364	155.172
618.056	149.817
618.748	104.495
619.439	137.384
620.131	145.542
620.823	97.9457
621.514	161.271
622.206	159.938
622.898	167.214
623.589	155.476
624.281	136.791
624.973	149.189
625.664	174.706
626.356	161.775
627.048	120.714
627.739	139.909
628.431	136.505
629.123	187.125
629.814	139.56
630.506	189.676
631.198	200.466
631.889	161.467
632.581	131.96
633.273	129.679
633.964	128.053
634.656	124.937
635.348	126.492
636.039	113.456
636.731	157.376
637.423	112.208
638.114	215.218
638.806	119.685
639.498	130.21
640.189	132.446
640.881	156.084
641.573	165.126
642.264	156.125
642.956	123.815
643.648	116.919
644.339	148.4
645.031	115.712
645.723	143.997
646.414	170.57
647.106	142.887
647.798	168.362
648.489	151.999
649.181	134.742
649.873	125.112
650.564	107.411
651.256	122.827
651.948	123.634
652.639	134.16
653.331	167.112
654.023	115.314
654.714	66.3679
655.406	131.106
656.098	190.875
656.789	176.123
657.481	129.263
658.173	141.993
658.864	145.878
659.556	143.859
660.248	159.442
660.939	113.955
661.631	103.863
662.323	143.334
663.014	132.176
663.706	122.787
664.398	99.9235
665.089	109.897
665.781	55.6068
666.473	142.07
667.164	84.605
667.856	116.257
668.547	115.389
669.239	113.439
669.931	89.1181
670.622	95.3766
671.314	131.384
672.006	152.857
672.698	149.46
673.389	139.92
674.081	139.308
674.772	89.4806
675.464	148.063
676.156	155.58
676.847	177.686
677.539	150.611
678.231	110.175
678.922	107.072
679.614	151.034
680.306	186.797
680.997	157.252
681.689	142.916
682.381	166.409
683.072	140.62
683.764	115.234
684.456	114.262
685.147	128.184
685.839	91.6122
686.531	124.305
687.222	70.1015
687.914	99.4424
688.606	103.563
689.297	102.206
689.989	104.236
690.681	106.668
691.372	119.823
692.064	122.476
692.756	117.091
693.447	137.384
694.139	147.582
694.831	143.801
695.522	140.066
696.214	113.476
696.906	136.89
697.597	77.2606
698.289	147.923
698.981	120.178
699.672	76.3509
700.364	91.3203
701.056	95.6128
701.747	110.205
702.439	133.714
703.131	127.654
703.822	105.366
704.514	72.7437
705.206	63.9296
705.897	102.023
706.589	153.119
707.281	95.1538
707.972	71.4089
708.664	121.758
709.356	116.262
710.047	104.678
710.739	103.634
711.431	134.952
712.122	113.954
712.814	102.96
713.506	120.957
714.197	94.0529
714.889	80.7783
715.581	115.563
716.272	91.2818
716.964	92.7047
717.656	62.5876
718.347	132.094
719.039	148.302
719.731	152.263
720.422	71.6289
721.114	81.2013
721.806	76.8105
722.497	107.71
723.189	93.119
723.881	50.1772
724.572	54.3846
725.264	90.5284
725.956	102.585
726.647	94.4882
727.339	150.139
728.031	79.0526
728.722	94.6295
729.414	99.3445
730.106	87.2349
730.797	69.5491
731.489	80.6387
732.181	102.91
732.872	92.0356
733.564	137.456
734.256	143.691
734.947	121.145
735.639	133.416
736.331	134.583
737.022	116.55
737.714	125.035
738.406	103.822
739.097	108.015
739.789	73.292
740.481	120.892
741.172	146.405
741.864	131.468
742.556	47.1795
743.247	89.4701
743.939	92.4112
744.63	131.191
745.322	82.4048
746.014	70.1596
746.706	108.06
747.397	91.8417
748.089	81.3933
748.781	89.479
749.472	47.2778
750.164	61.5906
750.855	62.8745
751.547	85.0593
752.239	80.0638
752.93	96.9526
753.622	71.316
754.314	110.666
755.005	113.16
755.697	63.2367
756.389	98.867
757.08	94.9201
757.772	101.618
758.464	104.047
759.155	109.72
759.847	105.998
760.539	83.7116
761.23	90.8591
761.922	120.511
762.614	117.549
763.305	124.604
763.997	107.904
764.689	90.5515
765.38	62.7784
766.072	82.8403
766.764	105.692
767.455	71.8144
768.147	103.234
768.839	137.947
769.53	102.363
770.222	87.8686
770.914	105.11
771.605	80.2325
772.297	90.2811
772.989	104.171
773.68	70.9777
774.372	70.2116
775.064	91.4233
775.755	86.9043
776.447	78.764
777.139	124.209
777.83	58.3348
778.522	86.5172
779.214	71.843
779.905	61.2834
780.597	82.4232
781.289	55.7204
781.98	39.4284
782.672	79.2313
783.364	92.0838
784.055	97.4833
784.747	76.1655
785.439	77.6311
786.13	90.2209
786.822	86.2472
787.514	87.6162
788.205	86.4742
788.897	81.8429
789.589	89.355
790.28	105.892
790.972	84.1851
791.664	87.9197
792.355	103.029
793.047	71.8524
793.739	106.464
794.43	96.6875
795.122	102.725
795.814	97.9512
796.505	64.4636
797.197	113.829
797.889	120.087
798.58	102.456
799.272	104.545
799.964	127.378
800.655	117.094
801.347	107.266
802.039	120.931
802.73	94.6151
803.422	100.469
804.114	108.476
804.805	120.681
805.497	123.914
806.189	96.9972
806.88	63.9608
807.572	86.0045
808.264	111.561
808.955	88.2517
809.647	58.6893
810.339	74.6021
811.03	100.783
811.722	88.5977
812.414	87.1323
813.105	99.9147
813.797	86.4811
814.489	97.4812
815.18	83.9113
815.872	87.0911
816.564	90.3539
817.255	87.3299
817.947	83.3826
818.638	102.391
819.33	91.2173
820.022	92.6489
820.713	87.7591
821.405	71.025
822.097	100.672
822.789	92.7229
823.48	75.1459
824.172	73.311
824.863	45.3063
825.555	83.3317
826.247	89.4115
826.938	83.6616
827.63	53.7736
828.322	71.1262
829.013	97.877
829.705	99.4526
830.397	94.9624
831.088	97.5748
831.78	89.9337
832.472	62.9275
833.163	76.3009
833.855	84.3068
834.547	67.2441
835.238	84.6179
835.93	61.1646
836.622	68.794
837.313	89.4003
838.005	77.078
838.697	72.0352
839.388	71.2745
840.08	86.9411
840.772	111.645
841.463	78.5617
842.155	70.6111
842.847	81.2777
843.538	89.3237
844.23	106.184
844.922	58.0334
845.613	66.861
846.305	80.9192
846.997	67.4058
847.688	85.2112
848.38	39.8521
849.072	81.6163
849.763	85.6236
850.455	88.0262
851.147	93.43
851.838	82.5419
852.53	90.7266
853.222	83.2824
853.913	57.725
854.605	68.135
855.297	62.6361
855.988	70.2207
856.68	75.4988
857.372	76.2664
858.063	72.2516
858.755	63.7759
859.447	76.2955
860.138	75.1825
860.83	88.4021
861.522	85.2618
862.213	79.8868
862.905	65.0931
863.597	61.883
864.288	81.4988
864.98	72.3671
865.672	66.951
866.363	89.3595
867.055	98.3603
867.747	84.3245
868.438	71.6498
869.13	76.5764
869.822	78.6524
870.513	78.1317
871.205	111.031
871.897	87.0999
872.588	60.2648
873.28	58.1745
873.972	57.0453
874.663	69.3205
875.355	115.645
876.047	92.4036
876.738	106.712
877.43	66.6713
878.122	57.7451
878.813	19.9083
879.505	76.0473
880.197	81.7465
880.888	27.0151
881.58	82.6218
882.272	80.1552
882.963	59.9729
883.655	59.2813
884.347	75.9969
885.038	98.1631
885.73	79.6181
886.422	43.317
887.113	53.3385
887.805	74.4929
888.497	71.6153
889.188	90.0344
889.88	84.3432
890.572	89.0982
891.263	85.5566
891.955	74.6221
892.647	26.6234
893.338	61.5527
894.03	60.8593
894.721	67.989
895.413	108.48
896.105	57.4901
896.797	81.1253
897.488	84.3691
898.18	74.3682
898.872	91.8338
899.563	95.6298
900.255	124.08
900.946	109.292
901.638	92.146
902.33	87.0502
903.021	66.7802
903.713	29.9345
904.405	39.7255
905.096	73.014
905.788	70.6303
906.48	68.9997
907.171	77.8167
907.863	84.4139
908.555	69.9844
909.246	42.0537
909.938	44.2238
910.63	129.94
911.321	67.3059
912.013	60.9577
912.705	60.6846
913.396	63.3804
914.088	110.399
914.78	59.1409
915.471	59.4289
916.163	79.2138
916.855	42.1414
917.546	89.7154
918.238	98.2184
918.93	74.659
919.621	61.1282
920.313	70.2493
921.005	87.2488
921.696	70.6643
922.388	73.6021
923.08	56.5783
923.771	60.879
924.463	68.6855
925.155	67.4572
925.846	78.1161
926.538	73.4499
927.23	66.3732
927.921	63.2179
928.613	52.23
929.305	71.5834
929.996	96.0738
930.688	89.7049
931.38	84.5012
932.071	66.7949
932.763	64.9616
933.455	31.1965
934.146	83.3891
934.838	118.613
935.53	82.065
936.221	85.7126
936.913	36.3314
937.605	39.196
938.296	99.5105
938.988	81.6606
939.68	87.6262
940.371	62.0792
941.063	91.3033
941.755	88.0538
942.446	46.1813
943.138	91.5748
943.83	83.0304
944.521	77.8962
945.213	81.4169
945.905	78.3374
946.596	66.4918
947.288	62.7688
947.98	60.2788
948.671	71.6622
949.363	80.1526
950.055	83.9655
950.746	102.585
951.438	103.002
952.13	85.8807
952.821	77.2569
953.513	84.9707
954.205	108.939
954.896	110.86
955.588	111.899
956.28	113.604
956.971	93.3459
957.663	75.8961
958.355	91.2748
959.046	114.338
959.738	132.57
960.43	160.624
961.121	103.62
961.813	145.268
962.505	130.081
963.196	119.366
963.888	113.821
964.58	131.768
965.271	111.761
965.963	114.216
966.655	113.69
967.346	146.709
968.038	143.898
968.73	116.72
969.421	99.7632
970.113	96.4818
970.804	101.514
971.496	72.652
972.188	66.1913
972.88	53.811
973.571	44.8602
974.263	71.5777
974.954	68.6619
975.646	73.5066
976.338	77.6484
977.029	69.9069
977.721	72.7943
978.413	78.0337
979.104	88.6662
979.796	85.0856
980.488	62.6788
981.179	64.0139
981.871	72.7217
982.563	61.7133
983.254	63.7255
983.946	69.55
984.638	70.9135
985.329	80.8374
986.021	98.9968
986.713	79.9028
987.404	55.8182
988.096	77.4955
988.788	70.8846
989.479	85.286
990.171	51.1479
990.863	55.2602
991.554	48.6287
992.246	53.9198
992.938	50.702
993.629	64.9753
994.321	52.2326
995.013	49.8618
995.704	70.7994
996.396	59.6092
997.088	85.417
997.779	70.635
998.471	67.4707
999.163	45.0097
999.854	73.8898
1000.55	79.0955
1001.24	54.8923
1001.93	106.74
1002.62	64.7927
1003.31	55.0355
1004	50.3513
1004.7	61.4182
1005.39	59.4678
1006.08	72.4628
1006.77	60.6111
1007.46	57.8274
1008.15	76.887
1008.85	77.4559
1009.54	86.0323
1010.23	79.2962
1010.92	56.2257
1011.61	74.5496
1012.3	77.0377
1013	94.9249
1013.69	96.7948
1014.38	76.4323
1015.07	57.016
1015.76	71.5619
1016.45	87.6292
1017.15	55.9843
1017.84	42.0742
1018.53	53.0052
1019.22	61.3076
1019.91	74.283
1020.6	80.9691
1021.3	88.7037
1021.99	84.7319
1022.68	66.3229
1023.37	72.8584
1024.06	84.8492
1024.75	76.6128
1025.45	75.938
1026.14	87.9012
1026.83	75.7621
1027.52	70.6979
1028.21	87.8916
1028.9	102.915
1029.6	91.395
1030.29	69.6777
1030.98	74.1446
1031.67	80.1946
1032.36	90.2448
1033.05	83.0548
1033.75	62.8457
1034.44	62.4672
1035.13	76.0017
1035.82	84.07
1036.51	86.4221
1037.2	46.5639
1037.9	111.78
1038.59	65.2801
1039.28	66.2648
1039.97	106.825
1040.66	54.8112
1041.35	69.538
1042.05	106.232
1042.74	99.9897
1043.43	40.0467
1044.12	107.454
1044.81	79.8421
1045.5	85.4406
1046.2	111.766
1046.89	66.4813
1047.58	67.0033
1048.27	94.7587
1048.96	107.916
1049.65	51.1658
1050.35	99.9172
1051.04	83.6685
1051.73	107.361
1052.42	95.2787
1053.11	103.811
1053.8	96.6595
1054.5	78.9642
1055.19	83.8514
1055.88	72.9099
1056.57	73.9192
1057.26	75.3888
1057.95	68.5169
1058.65	104.516
1059.34	64.0075
1060.03	113.171
1060.72	120.259
1061.41	117.855
1062.1	140.044
1062.8	105.962
1063.49	126.157
1064.18	128.258
1064.87	108.44
1065.56	139.655
1066.25	106.848
1066.95	111.086
1067.64	103.863
1068.33	130.486
1069.02	94.9705
1069.71	117.612
1070.4	136.153
1071.1	156.389
1071.79	154.512
1072.48	164.807
1073.17	175.466
1073.86	149.929
1074.55	177.997
1075.25	172.551
1075.94	210.046
1076.63	192.532
1077.32	164.02
1078.01	213.098
1078.7	204.817
1079.4	188.974
1080.09	179.862
1080.78	185.439
1081.47	210.216
1082.16	206.028
1082.85	193.262
1083.55	208.577
1084.24	196.504
1084.93	153.645
1085.62	168.912
1086.31	180.073
1087	203.409
1087.7	178.885
1088.39	199.419
1089.08	177.236
1089.77	165.373
1090.46	166.019
1091.15	178.871
1091.85	157.884
1092.54	163.134
1093.23	196.755
1093.92	204.01
1094.61	212.668
1095.3	174.97
1096	188.583
1096.69	217.86
1097.38	181.791
1098.07	202.604
1098.76	207.547
1099.45	215.235
1100.15	162
1100.84	189.228
1101.53	245.087
1102.22	220.613
1102.91	176.073
1103.6	206.674
1104.3	218.143
1104.99	223.175
1105.68	238.42
1106.37	224.517
1107.06	234.253
1107.75	239.97
1108.45	214.301
1109.14	188.369
1109.83	235.268
1110.52	262.926
1111.21	259.595
1111.9	268.915
1112.6	264.665
1113.29	236.802
1113.98	248.035
1114.67	253.264
1115.36	230.443
1116.05	268.609
1116.75	290.777
1117.44	250.54
1118.13	256.264
1118.82	295.834
1119.51	313.986
1120.2	290.851
1120.9	284.054
1121.59	267.106
1122.28	288.38
1122.97	309.045
1123.66	298.11
1124.35	294.959
1125.05	331.384
1125.74	261.326
1126.43	306.463
1127.12	319.684
1127.81	346.171
1128.5	305.873
1129.2	279.507
1129.89	351.94
1130.58	330.15
1131.27	364.019
1131.96	333
1132.65	353.221
1133.35	380.633
1134.04	398.853
1134.73	359.959
1135.42	328.669
1136.11	334.665
1136.8	372.899
1137.5	362.03
1138.19	377.657
1138.88	376.329
1139.57	402.942
1140.26	404.836
1140.95	386.143
1141.65	418.991
1142.34	434.252
1143.03	413.246
1143.72	371.604
1144.41	420.613
1145.1	431.291
1145.8	422.183
1146.49	373.872
1147.18	480.586
1147.87	410.2
1148.56	446.697
1149.25	447.934
1149.95	474.411
1150.64	445.52
1151.33	437.662
1152.02	462.402
1152.71	434.531
1153.4	471.416
1154.1	470.08
1154.79	517.56
1155.48	501.511
1156.17	479.506
1156.86	511.8
1157.55	554.199
1158.25	549.695
1158.94	535.829
1159.63	539.052
1160.32	574.274
1161.01	606.283
1161.7	587.852
1162.4	601.014
1163.09	604.565
1163.78	628.371
1164.47	618.752
1165.16	596.121
1165.85	605.229
1166.55	608.845
1167.24	632.803
1167.93	654.867
1168.62	673.768
1169.31	713.479
1170	728.364
1170.7	723.246
1171.39	693.556
1172.08	721.326
1172.77	739.907
1173.46	733.776
1174.15	759.984
1174.85	785.498
1175.54	796.089
1176.23	810.958
1176.92	849.03
1177.61	866.611
1178.3	906.602
1179	891.111
1179.69	906.378
1180.38	892.451
1181.07	964.621
1181.76	952.27
1182.45	1003.78
1183.15	1023.63
1183.84	1053.24
1184.53	1033.36
1185.22	1107.31
1185.91	1090.57
1186.6	1103.46
1187.3	1178.94
1187.99	1160.08
1188.68	1207.68
1189.37	1196.44
1190.06	1295
1190.75	1335.25
1191.45	1276.66
1192.14	1370.76
1192.83	1376.46
1193.52	1378.73
1194.21	1485.25
1194.9	1471.99
1195.6	1458.09
1196.29	1532.34
1196.98	1516.92
1197.67	1561.15
1198.36	1638.73
1199.05	1677.32
1199.75	1680.77
1200.44	1722.4
1201.13	1753.87
1201.82	1762.85
1202.51	1788.91
1203.2	1794.09
1203.9	1783.5
1204.59	1790.46
1205.28	1784
1205.97	1805.14
1206.66	1803.04
1207.35	1776.18
1208.05	1797.51
1208.74	1812.97
1209.43	1831.77
1210.12	1830.97
1210.81	1856.91
1211.5	1881.69
1212.2	1843.45
1212.89	1834.59
1213.58	1828.2
1214.27	1768.61
1214.96	1769.38
1215.65	1771.44
1216.35	1751.1
1217.04	1767.69
1217.73	1678.97
1218.42	1771.95
1219.11	1690.77
1219.8	1744.82
1220.5	1670.69
1221.19	1622.67
1221.88	1671.17
1222.57	1568.78
1223.26	1620.13
1223.95	1590.7
1224.64	1622.21
1225.34	1626.5
1226.03	1580.09
1226.72	1558.6
1227.41	1570.75
1228.1	1545.36
1228.8	1567.1
1229.49	1503.73
1230.18	1533.96
1230.87	1450.7
1231.56	1488.33
1232.25	1520.78
1232.95	1498.88
1233.64	1470.9
1234.33	1502.72
1235.02	1481.26
1235.71	1464.89
1236.4	1471.67
1237.1	1452.21
1237.79	1450.48
1238.48	1408.22
1239.17	1410.61
1239.86	1447.38
1240.55	1414.68
1241.24	1323.17
1241.94	1357.43
1242.63	1400.2
1243.32	1362.89
1244.01	1380.07
1244.7	1310
1245.39	1359.31
1246.09	1314.41
1246.78	1288.37
1247.47	1347.9
1248.16	1304.79
1248.85	1302.4
1249.54	1361.97
1250.24	1361.94
1250.93	1329.38
1251.62	1281.82
1252.31	1342
1253	1324.57
1253.69	1294.71
1254.39	1290.54
1255.08	1294.45
1255.77	1286.84
1256.46	1286.12
1257.15	1290.67
1257.85	1290.06
1258.54	1316.65
1259.23	1341.6
1259.92	1316.37
1260.61	1358.66
1261.3	1381.98
1261.99	1372.61
1262.69	1357.31
1263.38	1384.93
1264.07	1389.01
1264.76	1368.06
1265.45	1380.18
1266.14	1395.7
1266.84	1445.68
1267.53	1393.15
1268.22	1511.75
1268.91	1553.14
1269.6	1475.49
1270.29	1568.04
1270.99	1557.77
1271.68	1576.61
1272.37	1559.36
1273.06	1618.8
1273.75	1660.56
1274.44	1589.33
1275.14	1637.23
1275.83	1648.08
1276.52	1630.89
1277.21	1681.08
1277.9	1744.02
1278.59	1733.45
1279.29	1741.21
1279.98	1802.25
1280.67	1756.99
1281.36	1740.83
1282.05	1826.36
1282.74	1854.49
1283.44	1832.4
1284.13	1828.61
1284.82	1892.87
1285.51	1886.37
1286.2	1873.36
1286.89	1880.31
1287.59	1917.65
1288.28	1919.72
1288.97	1943.98
1289.66	1917.31
1290.35	1846.1
1291.04	1930.66
1291.74	1934.67
1292.43	1940.99
1293.12	1923.32
1293.81	1952.69
1294.5	2013.61
1295.19	1997.65
1295.89	1995.38
1296.58	1966.94
1297.27	1898.73
1297.96	1971.55
1298.65	1954.84
1299.34	1964.95
1300.04	1914.57
1300.73	1892.25
1301.42	1909.28
1302.11	1926.98
1302.8	1901.03
1303.49	1908.93
1304.19	1850.6
1304.88	1906.89
1305.57	1832.53
1306.26	1913.92
1306.95	1820.96
1307.64	1834.1
1308.34	1804.38
1309.03	1777.92
1309.72	1795.73
1310.41	1747.26
1311.1	1685.08
1311.79	1691.2
1312.49	1678.39
1313.18	1657.12
1313.87	1681.4
1314.56	1688.6
1315.25	1670.7
1315.94	1641.42
1316.64	1660.29
1317.33	1675.1
1318.02	1639.7
1318.71	1652.46
1319.4	1599.98
1320.09	1596.78
1320.79	1607.58
1321.48	1481.02
1322.17	1487.18
1322.86	1599.76
1323.55	1576.87
1324.24	1501.17
1324.94	1538.82
1325.63	1522.27
1326.32	1501.72
1327.01	1528.58
1327.7	1502.95
1328.39	1522.95
1329.09	1513.52
1329.78	1566.88
1330.47	1530.64
1331.16	1527.54
1331.85	1505.63
1332.54	1497.4
1333.24	1474.24
1333.93	1485.83
1334.62	1503.43
1335.31	1406.2
1336	1431.15
1336.69	1456.15
1337.39	1487.73
1338.08	1423.23
1338.77	1395.25
1339.46	1338.11
1340.15	1398.95
1340.84	1404.32
1341.54	1372.92
1342.23	1359.03
1342.92	1301.24
1343.61	1263.31
1344.3	1295.18
1344.99	1246.79
1345.69	1249.19
1346.38	1269.94
1347.07	1249.84
1347.76	1254.04
1348.45	1207.16
1349.14	1237.21
1349.84	1188.73
1350.53	1169.47
1351.22	1112.61
1351.91	1139.74
1352.6	1054.26
1353.29	1104.67
1353.99	1110.52
1354.68	1089.82
1355.37	1055.82
1356.06	1024.7
1356.75	1042.46
1357.44	968.91
1358.14	991.808
1358.83	1011.12
1359.52	981.719
1360.21	935.884
1360.9	889.686
1361.59	897.781
1362.29	924.887
1362.98	934.004
1363.67	900.222
1364.36	890.767
1365.05	849.929
1365.74	911.233
1366.44	880.732
1367.13	892.223
1367.82	841.52
1368.51	826.091
1369.2	820.387
1369.89	811.285
1370.59	801.565
1371.28	819.863
1371.97	822.19
1372.66	805.6
1373.35	810.107
1374.04	840.926
1374.74	837.406
1375.43	764.754
1376.12	753.523
1376.81	700.676
1377.5	775.121
1378.19	778.777
1378.89	795.954
1379.58	798.759
1380.27	789.961
1380.96	809.323
1381.65	824.372
1382.34	836.185
1383.04	824.44
1383.73	835.65
1384.42	808.563
1385.11	805.698
1385.8	871.138
1386.49	853.251
1387.19	781.252
1387.88	806.992
1388.57	806.772
1389.26	827.516
1389.95	845.812
1390.64	820.603
1391.34	867.53
1392.03	871.528
1392.72	840.752
1393.41	871.649
1394.1	889.835
1394.79	877.363
1395.49	910.442
1396.18	900.61
1396.87	892.92
1397.56	893.399
1398.25	881.367
1398.94	923.217
1399.64	947.175
1400.33	931.837
1401.02	956.271
1401.71	965.631
1402.4	1016.53
1403.09	989.895
1403.79	973.307
1404.48	958.204
1405.17	999.69
1405.86	1003.77
1406.55	1027.65
1407.24	1027.98
1407.94	1013.42
1408.63	987.969
1409.32	1050.58
1410.01	1047.55
1410.7	1066.37
1411.39	1013.12
1412.09	1080.21
1412.78	1084.66
1413.47	1103.12
1414.16	1094.61
1414.85	1096.89
1415.54	1119.74
1416.24	1116.69
1416.93	1080.06
1417.62	1119.1
1418.31	1138.12
1419	1126.64
1419.69	1157.95
1420.39	1110.6
1421.08	1121.65
1421.77	1149.08
1422.46	1135.93
1423.15	1193.35
1423.84	1138.71
1424.54	1101.53
1425.23	1135.71
1425.92	1116.94
1426.61	1117.96
1427.3	1138.02
1427.99	1144.68
1428.69	1140.03
1429.38	1130.27
1430.07	1091.11
1430.76	1101.26
1431.45	1108.77
1432.14	1144.64
1432.84	1151.25
1433.53	1138.15
1434.22	1101.19
1434.91	1116.74
1435.6	1114.31
1436.29	1111.8
1436.99	1128.39
1437.68	1131.6
1438.37	1102.1
1439.06	1092.69
1439.75	1106.83
1440.44	1076.38
1441.14	1089.17
1441.83	1059.31
1442.52	1017.91
1443.21	1031.34
1443.9	997.52
1444.59	1016.23
1445.29	962.825
1445.98	940.225
1446.67	930.282
1447.36	918.495
1448.05	909.234
1448.74	909.725
1449.44	925.785
1450.13	885.003
1450.82	891.617
1451.51	887.088
1452.2	888.823
1452.89	896.168
1453.59	924.224
1454.28	868.491
1454.97	858.386
1455.66	844.865
1456.35	864.304
1457.04	871.856
1457.74	842.89
1458.43	865.072
1459.12	856.505
1459.81	857.586
1460.5	852.646
1461.19	837.105
1461.89	829.583
1462.58	824.47
1463.27	845.828
1463.96	847.825
1464.65	837.343
1465.34	817.494
1466.04	860.272
1466.73	782.106
1467.42	827.995
1468.11	862.796
1468.8	861.154
1469.49	853.895
1470.19	827.806
1470.88	846.148
1471.57	872.272
1472.26	854.565
1472.95	875.442
1473.64	812.868
1474.34	839.339
1475.03	853.87
1475.72	847.793
1476.41	880.966
1477.1	832.032
1477.79	851.948
1478.49	852.289
1479.18	865.54
1479.87	873.462
1480.56	835.07
1481.25	856.723
1481.94	864.893
1482.64	846.222
[truncated: 748 more rows]

## Sheet: VTL1_784_pos4_bone
100	81.6566
100.692	39.2008
101.383	77.953
102.075	71.5136
102.767	66.1297
103.458	76.4081
104.15	99.964
104.842	150.722
105.533	114.091
106.225	120.551
106.917	136.165
107.608	124.577
108.3	90.1196
108.992	88.1419
109.683	118.914
110.375	113.921
111.067	117.825
111.758	117.193
112.45	114.07
113.142	125.062
113.833	128.095
114.525	108.587
115.217	112.499
115.908	89.7518
116.6	63.7461
117.292	81.4531
117.983	138.008
118.675	137.634
119.367	124.522
120.058	105.68
120.75	93.7044
121.442	84.0256
122.133	63.0745
122.825	117.532
123.517	108.114
124.208	85.7836
124.9	93.0262
125.592	106.09
126.283	85.9473
126.975	88.0673
127.667	111.164
128.358	122.192
129.05	112.367
129.742	92.4452
130.433	86.5397
131.125	112.892
131.817	71.9206
132.508	118.391
133.2	118.542
133.892	86.0146
134.583	54.6576
135.275	53.1137
135.967	111.068
136.658	111.077
137.35	98.3447
138.042	107.773
138.733	119.549
139.425	119.487
140.116	132.209
140.808	106.428
141.5	118.403
142.191	110.881
142.883	120.969
143.575	138.144
144.266	124.767
144.958	118.463
145.65	89.5233
146.341	124.166
147.033	109.247
147.725	81.8375
148.416	91.4401
149.108	115.638
149.8	131.423
150.491	52.8514
151.183	44.6247
151.875	66.3901
152.566	106.117
153.258	151.376
153.95	102.582
154.641	101.366
155.333	99.469
156.025	140.092
156.716	145.463
157.408	97.9379
158.1	80.1878
158.791	140.129
159.483	125.739
160.175	147.646
160.866	132.061
161.558	123.946
162.25	152.752
162.941	121.676
163.633	89.0102
164.325	98.7692
165.016	131.332
165.708	126.068
166.4	109.723
167.091	128.687
167.783	91.6491
168.475	120.172
169.166	148.053
169.858	153.859
170.55	138.49
171.241	117.106
171.933	107.396
172.625	108.701
173.316	127.233
174.008	96.8752
174.7	104.747
175.391	124.763
176.083	121.356
176.775	126.458
177.466	135.471
178.158	128.899
178.85	110.738
179.541	125.54
180.233	144.444
180.925	125.022
181.616	96.4684
182.308	83.309
183	67.9136
183.691	107.041
184.383	122.972
185.075	98.145
185.766	85.1216
186.458	126.376
187.15	108.96
187.841	118.988
188.533	103.436
189.225	90.4112
189.916	86.6873
190.608	73.478
191.3	91.0588
191.991	79.0386
192.683	87.0486
193.375	109.496
194.066	116.459
194.758	111.266
195.45	124.977
196.141	109.29
196.833	94.3741
197.525	109.538
198.216	104.818
198.908	118.245
199.6	143.83
200.291	109.412
200.983	131.368
201.675	127.163
202.366	110.937
203.058	97.02
203.75	107.096
204.441	120.897
205.133	88.4719
205.825	134.384
206.516	133.41
207.208	128.341
207.9	140.568
208.591	136.265
209.283	105.927
209.975	103.279
210.666	124.317
211.358	121.255
212.05	139.207
212.741	144.476
213.433	139.168
214.125	150.384
214.816	187.172
215.508	126.812
216.199	146.387
216.891	112.358
217.583	149.442
218.274	129.573
218.966	64.7815
219.658	215.879
220.349	124.631
221.041	126.223
221.733	119.297
222.424	127.84
223.116	126.615
223.808	107.152
224.499	108.455
225.191	127.019
225.883	107.582
226.574	106.563
227.266	118.16
227.958	128.875
228.649	134.79
229.341	143.726
230.033	156.271
230.724	113.977
231.416	100.264
232.108	150.688
232.799	190.394
233.491	192.376
234.183	190.253
234.874	129.67
235.566	180.15
236.258	131.581
236.949	126.267
237.641	132.108
238.333	127.026
239.024	126.026
239.716	110.557
240.408	147.336
241.099	119.02
241.791	142.871
242.483	147.619
243.174	136.122
243.866	151.56
244.558	164.489
245.249	170.223
245.941	104.872
246.633	120.36
247.324	150.177
248.016	168.696
248.708	174.247
249.399	154.531
250.091	150.784
250.783	188.409
251.474	212.599
252.166	206.435
252.858	185.862
253.549	160.936
254.241	145.168
254.933	222.496
255.624	108.246
256.316	135.874
257.008	183.459
257.699	185.43
258.391	163.469
259.083	167.659
259.774	184.474
260.466	198.02
261.158	190.359
261.849	182.534
262.541	182.517
263.233	187.044
263.924	181.606
264.616	158.339
265.308	179.686
265.999	184.26
266.691	167.895
267.383	178.731
268.074	190.501
268.766	181.628
269.458	165.316
270.149	159.386
270.841	185.993
271.533	151.449
272.224	160.429
272.916	156.937
273.608	165.406
274.299	196.296
274.991	164.411
275.683	226.568
276.374	205.755
277.066	226.49
277.758	201.972
278.449	179.794
279.141	193.198
279.833	201.405
280.524	169.874
281.216	181.772
281.908	187.553
282.599	166.47
283.291	156.949
283.983	182.454
284.674	213.73
285.366	194.98
286.058	205.157
286.749	157.943
287.441	163.19
288.133	140.248
288.824	153.15
289.516	197.366
290.207	193.288
290.899	146.339
291.591	140.018
292.283	139.213
292.974	136.342
293.666	162.457
294.357	170.813
295.049	151.649
295.741	165.193
296.432	177.448
297.124	147.62
297.816	169.663
298.507	149.511
299.199	143.195
299.891	144.525
300.582	133.162
301.274	153.473
301.966	138.399
302.657	163.895
303.349	149.197
304.041	140.724
304.732	173.967
305.424	195.809
306.116	162.833
306.807	180.374
307.499	191.492
308.191	149.661
308.882	134.976
309.574	123.627
310.266	119.778
310.957	122.933
311.649	129.679
312.341	175.019
313.032	161.762
313.724	161.924
314.416	142.24
315.107	128.716
315.799	126.53
316.491	122.155
317.182	114.354
317.874	147.27
318.566	151.439
319.257	123.843
319.949	95.4315
320.641	88.4929
321.332	101.216
322.024	101.762
322.716	75.3156
323.407	132.912
324.099	153.705
324.791	143.97
325.482	164.897
326.174	154.163
326.866	115.892
327.557	93.5079
328.249	92.1656
328.941	66.4588
329.632	97.7806
330.324	77.3931
331.016	80.3666
331.707	77.1535
332.399	70.508
333.091	90.5547
333.782	134.401
334.474	118.158
335.166	84.7505
335.857	96.4206
336.549	122.31
337.241	100.465
337.932	84.1636
338.624	105.852
339.316	98.9708
340.007	87.9165
340.699	28.1921
341.391	59.7884
342.082	70.2736
342.774	84.0631
343.466	93.7695
344.157	84.9141
344.849	76.6914
345.541	95.0405
346.232	115.989
346.924	120.225
347.616	107.962
348.307	107.597
348.999	104.348
349.691	98.733
350.382	113.159
351.074	119.006
351.766	74.0277
352.457	100.965
353.149	152.754
353.841	123.142
354.532	117.073
355.224	137.335
355.916	104.506
356.607	109.315
357.299	102.993
357.991	101.831
358.682	133.512
359.374	125.423
360.066	117.598
360.757	114.382
361.449	109.585
362.14	137.829
362.832	108.871
363.524	121.041
364.216	128.647
364.907	106.546
365.599	109.588
366.291	104.666
366.982	93.8368
367.674	131.256
368.365	98.3204
369.057	107.015
369.749	115.711
370.44	116.84
371.132	76.3399
371.824	51.3002
372.515	58.533
373.207	66.9706
373.899	86.9799
374.59	78.0508
375.282	71.7208
375.974	68.4209
376.665	82.0021
377.357	109.321
378.049	137.549
378.74	123.442
379.432	47.6282
380.124	68.0929
380.815	113.876
381.507	51.1297
382.199	76.7191
382.89	76.2895
383.582	72.5045
384.274	107.443
384.965	135.902
385.657	86.7064
386.349	106.952
387.04	61.8579
387.732	99.6295
388.424	80.1264
389.115	63.032
389.807	62.8201
390.499	63.2613
391.19	75.3488
391.882	93.7725
392.574	111.432
393.265	87.5686
393.957	53.797
394.649	68.0775
395.34	57.5811
396.032	29.2024
396.724	49.1163
397.415	102.225
398.107	103.528
398.799	91.9531
399.49	81.9584
400.182	89.2476
400.874	92.4661
401.565	86.5373
402.257	68.8917
402.949	51.146
403.64	70.3747
404.332	94.2201
405.024	115.48
405.715	95.7092
406.407	67.2728
407.099	84.4446
407.79	84.1012
408.482	50.6315
409.174	53.5184
409.865	83.4409
410.557	89.5528
411.249	94.876
411.94	93.3283
412.632	36.9779
413.324	26.1894
414.015	49.7236
414.707	76.9019
415.399	102.942
416.09	41.6744
416.782	56.7647
417.474	60.5674
418.165	70.0717
418.857	42.2946
419.549	37.1157
420.24	42.4753
420.932	51.7375
421.624	91.2131
422.315	99.2248
423.007	124.968
423.699	109.286
424.39	101.351
425.082	62.9091
425.774	82.4886
426.465	111.578
427.157	100.976
427.849	83.6653
428.54	37.4381
429.232	38.2857
429.924	94.2066
430.615	98.439
431.307	69.0259
431.999	72.1874
432.69	91.9048
433.382	97.729
434.074	82.577
434.765	39.2714
435.457	105.907
436.149	78.2059
436.84	83.5019
437.532	108.153
438.224	86.9888
438.915	73.7918
439.607	83.2236
440.298	75.5032
440.99	74.3846
441.682	89.293
442.373	16.1033
443.065	71.3356
443.757	106.003
444.448	44.4266
445.14	36.2877
445.832	57.5915
446.523	39.3724
447.215	74.3506
447.907	91.279
448.598	61.7022
449.29	119.064
449.982	111.437
450.673	75.9
451.365	77.8903
452.057	85.2565
452.748	71.5664
453.44	73.3254
454.132	86.7176
454.823	42.1121
455.515	38.5063
456.207	102.186
456.898	81.901
457.59	49.8519
458.282	44.2229
458.973	60.0233
459.665	84.9665
460.357	101.721
461.048	75.3845
461.74	83.4267
462.432	55.8147
463.123	87.2976
463.815	104.265
464.507	93.9122
465.198	75.4162
465.89	68.6777
466.582	72.9036
467.273	67.6557
467.965	74.4968
468.657	63.6863
469.348	79.6914
470.04	85.0716
470.732	74.1228
471.423	74.1223
472.115	82.4011
472.807	83.2916
473.498	81.2077
474.19	77.6946
474.882	99.2044
475.573	92.428
476.265	110.291
476.957	66.3947
477.648	53.303
478.34	62.3266
479.032	76.4704
479.723	87.8914
480.415	61.22
481.107	42.2206
481.798	53.0348
482.49	61.1535
483.182	73.8671
483.873	52.6642
484.565	39.7404
485.257	74.6855
485.948	103.212
486.64	80.6763
487.332	79.549
488.023	93.8668
488.715	60.5545
489.407	74.7445
490.098	67.2535
490.79	72.828
491.482	75.4911
492.173	92.2421
492.865	101.838
493.557	86.8991
494.248	102.438
494.94	110.493
495.632	61.8694
496.323	68.7752
497.015	77.7697
497.707	106.276
498.398	120.211
499.09	93.5159
499.782	67.5528
500.473	85.3348
501.165	100.914
501.857	53.4534
502.548	91.2865
503.24	48.6125
503.932	64.2384
504.623	112.077
505.315	79.4247
506.007	73.1613
506.698	84.617
507.39	73.7303
508.082	97.2452
508.773	38.0527
509.465	55.9069
510.157	54.9516
510.848	67.1215
511.54	84.2811
512.232	85.5061
512.923	78.1162
513.615	79.8823
514.307	71.4425
514.998	46.2197
515.69	70.2442
516.382	72.7127
517.073	70.8898
517.765	74.1673
518.456	24.5353
519.148	28.6616
519.84	66.6419
520.531	60.1378
521.223	34.6476
521.915	44.3886
522.607	53.8274
523.298	72.6593
523.99	44.7052
524.681	64.569
525.373	44.6486
526.065	26.6833
526.756	29.7403
527.448	45.7307
528.14	57.7552
528.831	47.5478
529.523	29.7992
530.215	48.108
530.906	30.3108
531.598	42.1202
532.29	67.9248
532.981	70.6786
533.673	18.6882
534.365	31.8882
535.056	68.525
535.748	75.8724
536.44	63.0171
537.131	49.8134
537.823	51.0792
538.515	48.0148
539.206	18.9267
539.898	48.2473
540.59	69.3965
541.281	74.2899
541.973	46.2446
542.665	22.8012
543.356	23.6402
544.048	35.7792
544.74	46.6703
545.431	37.4513
546.123	14.2417
546.815	66.0552
547.506	46.8575
548.198	54.5824
548.89	64.1333
549.581	87.4699
550.273	69.4276
550.965	31.9531
551.656	42.9035
552.348	66.9658
553.04	28.771
553.731	71.5277
554.423	43.3109
555.115	53.1391
555.806	66.5073
556.498	44.4346
557.19	67.4815
557.881	80.5999
558.573	71.192
559.265	59.1643
559.956	41.9727
560.648	68.1488
561.34	70.8814
562.031	74.5014
562.723	77.2731
563.415	77.5827
564.106	58.2602
564.798	80.5142
565.49	58.1579
566.181	36.0327
566.873	46.697
567.565	32.8919
568.256	25.8494
568.948	63.9853
569.64	113.49
570.331	59.5808
571.023	56.9227
571.715	57.9275
572.406	32.1848
573.098	11.6056
573.79	19.9167
574.481	56.4585
575.173	75.2159
575.865	53.2353
576.556	77.3674
577.248	78.5259
577.94	58.3304
578.631	44.418
579.323	45.2158
580.015	65.9253
580.706	53.9656
581.398	62.4911
582.09	62.786
582.781	56.008
583.473	73.3681
584.165	58.1879
584.856	19.448
585.548	66.4319
586.24	46.2878
586.931	39.214
587.623	57.2519
588.315	60.83
589.006	47.7391
589.698	44.4354
590.39	68.0938
591.081	83.823
591.773	69.3763
592.464	64.4232
593.156	55.8275
593.848	90.3505
594.539	56.3748
595.231	52.9876
595.923	69.2385
596.615	72.1689
597.306	74.0316
597.998	66.2715
598.689	63.5318
599.381	70.9216
600.073	59.11
600.764	31.9258
601.456	54.3317
602.148	41.4071
602.839	28.5352
603.531	56.4523
604.223	76.087
604.914	76.2497
605.606	58.0495
606.298	61.1521
606.989	65.3992
607.681	60.4678
608.373	68.6679
609.064	78.7174
609.756	69.2459
610.448	95.7094
611.139	53.2793
611.831	57.8487
612.523	33.7708
613.214	34.3852
613.906	59.1668
614.598	77.1746
615.289	73.0224
615.981	45.358
616.673	40.3281
617.364	67.2806
618.056	61.4608
618.748	109.358
619.439	92.3796
620.131	52.6629
620.823	12.9869
621.514	42.2336
622.206	86.7188
622.898	73.819
623.589	47.2495
624.281	57.2775
624.973	77.5745
625.664	68.3732
626.356	49.6126
627.048	52.6832
627.739	57.3687
628.431	88.0561
629.123	52.8827
629.814	63.3901
630.506	28.1502
631.198	69.7086
631.889	68.7049
632.581	35.4332
633.273	40.9086
633.964	57.2454
634.656	61.8162
635.348	87.3234
636.039	81.7365
636.731	58.2283
637.423	58.5454
638.114	46.3798
638.806	40.5094
639.498	38.1108
640.189	58.2228
640.881	49.6359
641.573	46.6638
642.264	51.8158
642.956	47.4945
643.648	49.8292
644.339	62.6402
645.031	57.5737
645.723	74.8436
646.414	53.8124
647.106	100.033
647.798	51.7685
648.489	14.3584
649.181	30.4014
649.873	56.4473
650.564	67.9671
651.256	75.2428
651.948	62.5403
652.639	59.1659
653.331	86.0025
654.023	74.0785
654.714	29.0578
655.406	73.6323
656.098	38.7722
656.789	60.8542
657.481	61.5766
658.173	62.2993
658.864	46.6643
659.556	60.0822
660.248	68.4563
660.939	55.1705
661.631	62.1839
662.323	78.5809
663.014	62.9007
663.706	51.9759
664.398	68.3579
665.089	61.0786
665.781	35.3527
666.473	47.2376
667.164	69.8445
667.856	24.0464
668.547	75.5104
669.239	56.1067
669.931	49.7746
670.622	65.9276
671.314	67.5589
672.006	66.3188
672.698	69.0952
673.389	60.2366
674.081	62.7177
674.772	73.6331
675.464	71.44
676.156	65.65
676.847	69.0181
677.539	67.5156
678.231	67.0335
678.922	57.0257
679.614	61.6215
680.306	67.0865
680.997	59.8463
681.689	44.8499
682.381	47.0131
683.072	64.2794
683.764	60.2274
684.456	72.9317
685.147	61.8417
685.839	86.5438
686.531	65.898
687.222	78.068
687.914	61.4783
688.606	42.9991
689.297	47.1246
689.989	51.6246
690.681	46.7966
691.372	58.1733
692.064	69.7436
692.756	64.2574
693.447	71.7957
694.139	79.8062
694.831	54.9984
695.522	38.4893
696.214	68.7466
696.906	52.6718
697.597	54.4795
698.289	70.2924
698.981	63.4322
699.672	30.1562
700.364	54.8528
701.056	87.4749
701.747	68.8888
702.439	46.2272
703.131	47.7401
703.822	51.1304
704.514	65.8031
705.206	49.7293
705.897	61.8264
706.589	71.9118
707.281	34.1921
707.972	15.0166
708.664	59.717
709.356	39.9536
710.047	54.0445
710.739	79.6696
711.431	87.7541
712.122	74.0613
712.814	54.7038
713.506	43.5393
714.197	43.5617
714.889	50.8954
715.581	51.8818
716.272	48.9774
716.964	83.1701
717.656	64.2922
718.347	66.8115
719.039	19.7854
719.731	57.3729
720.422	41.8608
721.114	55.7107
721.806	61.2549
722.497	65.826
723.189	74.5873
723.881	68.0848
724.572	58.6966
725.264	55.757
725.956	29.1485
726.647	6.19417
727.339	58.8155
728.031	81.6771
728.722	75.9384
729.414	47.7336
730.106	68.175
730.797	54.908
731.489	61.8539
732.181	58.9394
732.872	63.6043
733.564	80.8391
734.256	59.2732
734.947	44.151
735.639	47.6633
736.331	49.0779
737.022	62.9829
737.714	74.6409
738.406	50.5998
739.097	22.8858
739.789	52.6498
740.481	55.0728
741.172	56.6728
741.864	37.4882
742.556	36.9528
743.247	24.3486
743.939	67.5854
744.63	61.8488
745.322	78.0084
746.014	70.7349
746.706	68.4824
747.397	77.3242
748.089	58.1489
748.781	27.262
749.472	33.1491
750.164	68.5341
750.855	62.7649
751.547	45.6231
752.239	71.741
752.93	53.7153
753.622	68.4475
754.314	61.1248
755.005	58.4128
755.697	52.9454
756.389	70.3313
757.08	74.7223
757.772	72.4982
758.464	66.1325
759.155	30.6367
759.847	39.1057
760.539	70.7356
761.23	56.2883
761.922	44.8986
762.614	33.475
763.305	28.8291
763.997	25.8474
764.689	52.6234
765.38	30.8541
766.072	73.9833
766.764	36.5833
767.455	53.9717
768.147	44.6603
768.839	75.2774
769.53	49.8089
770.222	59.5991
770.914	57.1573
771.605	24.6456
772.297	30.0475
772.989	58.5976
773.68	63.9897
774.372	73.4974
775.064	81.0992
775.755	52.2433
776.447	56.0081
777.139	41.0775
777.83	19.8745
778.522	49.0736
779.214	63.8259
779.905	87.9992
780.597	62.4549
781.289	54.5268
781.98	39.9491
782.672	51.398
783.364	69.5405
784.055	59.7943
784.747	69.9194
785.439	71.4095
786.13	45.7424
786.822	34.9915
787.514	33.8018
788.205	37.1982
788.897	66.3446
789.589	59.4345
790.28	64.634
790.972	50.0856
791.664	56.8753
792.355	41.3632
793.047	30.495
793.739	51.4933
794.43	56.9137
795.122	83.1159
795.814	60.5618
796.505	51.5933
797.197	54.7994
797.889	56.1523
798.58	56.3606
799.272	64.5342
799.964	55.6533
800.655	51.6441
801.347	58.2155
802.039	67.2951
802.73	80.4388
803.422	38.8314
804.114	15.9729
804.805	41.8946
805.497	48.7381
806.189	66.8878
806.88	11.5335
807.572	95.6191
808.264	56.0335
808.955	52.1533
809.647	57.8087
810.339	88.9136
811.03	68.4948
811.722	78.6276
812.414	49.9018
813.105	48.7573
813.797	44.489
814.489	61.2155
815.18	71.7296
815.872	66.7727
816.564	75.8545
817.255	79.2214
817.947	61.7243
818.638	61.3653
819.33	58.8077
820.022	50.941
820.713	39.8659
821.405	45.4662
822.097	38.5749
822.789	51.8948
823.48	67.4543
824.172	26.5859
824.863	26.9247
825.555	56.2379
826.247	56.2611
826.938	57.8926
827.63	59.5757
828.322	59.5157
829.013	64.7166
829.705	55.7095
830.397	44.705
831.088	56.3315
831.78	46.7404
832.472	33.2889
833.163	54.6665
833.855	59.0731
834.547	56.6593
835.238	60.8828
835.93	55.6722
836.622	32.5045
837.313	47.5678
838.005	77.9729
838.697	57.5726
839.388	73.8983
840.08	58.6253
840.772	56.1362
841.463	48.6212
842.155	23.3867
842.847	54.3882
843.538	68.8148
844.23	54.232
844.922	56.0467
845.613	69.9881
846.305	65.6003
846.997	61.2018
847.688	55.0603
848.38	69.2326
849.072	72.7506
849.763	47.973
850.455	49.4247
851.147	62.3877
851.838	58.4285
852.53	56.0313
853.222	39.5527
853.913	22.0566
854.605	43.8996
855.297	60.0872
855.988	63.9815
856.68	90.3452
857.372	76.1233
858.063	93.1291
858.755	90.55
859.447	88.5013
860.138	51.3725
860.83	92.3372
861.522	61.8091
862.213	90.9682
862.905	74.9436
863.597	70.5686
864.288	75.5375
864.98	63.8183
865.672	76.3706
866.363	61.1982
867.055	45.4687
867.747	44.3836
868.438	42.1967
869.13	57.9269
869.822	70.7411
870.513	57.1296
871.205	51.1343
871.897	72.4799
872.588	72.3148
873.28	64.6976
873.972	47.0854
874.663	62.9107
875.355	87.5127
876.047	60.9187
876.738	36.0182
877.43	45.6246
878.122	46.9412
878.813	72.4985
879.505	67.5795
880.197	51.7189
880.888	34.1555
881.58	56.4147
882.272	41.0636
882.963	52.1247
883.655	54.4062
884.347	51.9427
885.038	57.1861
885.73	47.3005
886.422	42.0391
887.113	47.0951
887.805	50.4203
888.497	66.623
889.188	73.9034
889.88	55.2646
890.572	51.2154
891.263	83.8356
891.955	59.3919
892.647	49.2283
893.338	76.3861
894.03	68.466
894.721	31.1398
895.413	56.3017
896.105	58.1063
896.797	63.5932
897.488	63.5752
898.18	47.8473
898.872	53.2921
899.563	57.1124
900.255	67.3348
900.946	81.751
901.638	59.124
902.33	35.9233
903.021	36.6023
903.713	10.905
904.405	11.9363
905.096	51.2887
905.788	47.1481
906.48	35.5736
907.171	43.4568
907.863	36.9892
908.555	42.847
909.246	27.6924
909.938	43.7279
910.63	59.4273
911.321	73.7576
912.013	33.9913
912.705	30.4636
913.396	61.5705
914.088	75.199
914.78	50.04
915.471	30.0735
916.163	40.9768
916.855	65.2011
917.546	48.281
918.238	45.4182
918.93	32.4757
919.621	54.7095
920.313	46.2336
921.005	61.6677
921.696	63.2392
922.388	45.174
923.08	38.2834
923.771	35.9522
924.463	39.4961
925.155	47.494
925.846	46.9403
926.538	49.4295
927.23	64.3952
927.921	63.9393
928.613	36.6424
929.305	23.742
929.996	46.1927
930.688	70.11
931.38	50.0894
932.071	39.998
932.763	26.2384
933.455	43.1659
934.146	53.7749
934.838	41.4564
935.53	59.1371
936.221	40.8148
936.913	66.008
937.605	52.99
938.296	39.5939
938.988	31.8502
939.68	68.1123
940.371	60.5686
941.063	33.8371
941.755	51.6016
942.446	61.6471
943.138	56.5829
943.83	58.7161
944.521	30.0105
945.213	11.2729
945.905	39.5747
946.596	53.3305
947.288	68.1547
947.98	67.4217
948.671	67.7149
949.363	56.8368
950.055	35.9014
950.746	50.3812
951.438	62.6635
952.13	52.9724
952.821	47.53
953.513	58.6798
954.205	66.9851
954.896	51.9272
955.588	55.4217
956.28	60.1455
956.971	61.9246
957.663	86.9811
958.355	91.3255
959.046	85.0872
959.738	72.3026
960.43	95.7712
961.121	87.1341
961.813	92.7908
962.505	81.2378
963.196	94.3479
963.888	95.4308
964.58	87.199
965.271	76.0707
965.963	66.988
966.655	70.4705
967.346	74.6802
968.038	55.1937
968.73	37.3526
969.421	59.3813
970.113	53.6648
970.804	52.8517
971.496	57.309
972.188	46.9446
972.88	37.679
973.571	39.6276
974.263	43.968
974.954	36.3253
975.646	27.0032
976.338	35.0235
977.029	38.3247
977.721	46.9686
978.413	62.9708
979.104	60.7806
979.796	35.7952
980.488	10.3026
981.179	26.0196
981.871	55.3459
982.563	53.8206
983.254	50.6213
983.946	57.2849
984.638	45.3638
985.329	38.9544
986.021	55.9219
986.713	22.6568
987.404	45.9371
988.096	36.7022
988.788	68.99
989.479	55.4802
990.171	42.7916
990.863	65.1654
991.554	50.2955
992.246	35.0533
992.938	43.5646
993.629	45.3116
994.321	44.1369
995.013	23.9197
995.704	49.8385
996.396	45.3318
997.088	66.3718
997.779	42.1557
998.471	15.7865
999.163	20.1161
999.854	48.162
1000.55	14.5262
1001.24	62.5496
1001.93	34.8185
1002.62	56.7317
1003.31	29.2395
1004	33.9336
1004.7	51.7135
1005.39	64.1799
1006.08	37.6629
1006.77	24.2827
1007.46	45.0582
1008.15	38.6766
1008.85	45.6458
1009.54	74.4838
1010.23	72.5584
1010.92	48.9867
1011.61	55.2196
1012.3	58.3002
1013	38.4293
1013.69	34.3495
1014.38	32.2092
1015.07	33.4623
1015.76	61.4203
1016.45	64.2693
1017.15	45.1094
1017.84	51.6274
1018.53	50.1553
1019.22	38.6636
1019.91	43.4782
1020.6	42.8132
1021.3	53.4267
1021.99	74.5446
1022.68	64.4549
1023.37	61.0738
1024.06	66.9321
1024.75	52.3987
1025.45	44.0604
1026.14	47.0534
1026.83	43.374
1027.52	44.4086
1028.21	53.1424
1028.9	50.0482
1029.6	35.4143
1030.29	50.1193
1030.98	62.2037
1031.67	54.4882
1032.36	38.0246
1033.05	42.8902
1033.75	59.475
1034.44	70.9538
1035.13	66.6416
1035.82	61.8997
1036.51	46.5613
1037.2	58.4139
1037.9	44.2342
1038.59	51.9904
1039.28	82.0652
1039.97	42.4033
1040.66	67.6632
1041.35	72.1732
1042.05	79.7731
1042.74	55.268
1043.43	50.7363
1044.12	46.774
1044.81	39.2471
1045.5	52.4851
1046.2	63.1203
1046.89	44.6743
1047.58	60.5531
1048.27	91.9892
1048.96	47.1284
1049.65	26.8977
1050.35	60.4573
1051.04	54.6228
1051.73	61.1564
1052.42	45.895
1053.11	46.7258
1053.8	63.2718
1054.5	73.9939
1055.19	79.5589
1055.88	51.8102
1056.57	107.141
1057.26	88.103
1057.95	79.3826
1058.65	67.7158
1059.34	77.3497
1060.03	67.9869
1060.72	57.9334
1061.41	57.2232
1062.1	70.2486
1062.8	40.2619
1063.49	58.7392
1064.18	77.0773
1064.87	91.4606
1065.56	72.576
1066.25	80.2547
1066.95	70.7264
1067.64	87.6699
1068.33	95.2081
1069.02	82.5966
1069.71	107.148
1070.4	119.1
1071.1	75.668
1071.79	116.227
1072.48	118.352
1073.17	128.485
1073.86	126.976
1074.55	131.301
1075.25	116.847
1075.94	121.269
1076.63	132.764
1077.32	117.956
1078.01	112.023
1078.7	129.092
1079.4	124.972
1080.09	136.75
1080.78	97.003
1081.47	117.256
1082.16	127.399
1082.85	105.218
1083.55	104.264
1084.24	93.7633
1084.93	94.0955
1085.62	118.537
1086.31	104.176
1087	133.254
1087.7	144.92
1088.39	118.378
1089.08	104.156
1089.77	109.491
1090.46	110.579
1091.15	115.373
1091.85	131.19
1092.54	130.813
1093.23	120.452
1093.92	152.617
1094.61	123.155
1095.3	129.233
1096	140.426
1096.69	128.352
1097.38	123.098
1098.07	123.883
1098.76	140.598
1099.45	151.023
1100.15	147.839
1100.84	160.973
1101.53	148.476
1102.22	145.378
1102.91	118.776
1103.6	152.886
1104.3	143.959
1104.99	117.271
1105.68	178.31
1106.37	180.919
1107.06	165.85
1107.75	181.682
1108.45	171.563
1109.14	154.548
1109.83	145.591
1110.52	163.274
1111.21	177.75
1111.9	199.273
1112.6	166.192
1113.29	184.822
1113.98	193.241
1114.67	194.392
1115.36	194.245
1116.05	185.844
1116.75	209.099
1117.44	199.254
1118.13	188.536
1118.82	212.205
1119.51	200.606
1120.2	197.712
1120.9	200.891
1121.59	211.227
1122.28	224.428
1122.97	230.899
1123.66	194.532
1124.35	221.326
1125.05	226.734
1125.74	207.956
1126.43	238.731
1127.12	266.41
1127.81	253.613
1128.5	252.12
1129.2	222.468
1129.89	277.121
1130.58	248.06
1131.27	259.201
1131.96	268.984
1132.65	262.85
1133.35	278.74
1134.04	295.153
1134.73	286.325
1135.42	264.995
1136.11	269.725
1136.8	266.057
1137.5	297.142
1138.19	253.404
1138.88	310.74
1139.57	327.504
1140.26	319.595
1140.95	302.461
1141.65	276.509
1142.34	286.047
1143.03	282.96
1143.72	297.53
1144.41	313.151
1145.1	335.557
1145.8	334.045
1146.49	350.368
1147.18	309.642
1147.87	308.49
1148.56	359.524
1149.25	345.617
1149.95	363.24
1150.64	357.614
1151.33	348.54
1152.02	349.685
1152.71	378.037
1153.4	372.576
1154.1	354.619
1154.79	398.745
1155.48	393.684
1156.17	370.698
1156.86	385.781
1157.55	430.489
1158.25	398.321
1158.94	402.651
1159.63	403.971
1160.32	434.264
1161.01	445.25
1161.7	449.009
1162.4	439.511
1163.09	449.166
1163.78	480.755
1164.47	454.274
1165.16	429.86
1165.85	461.7
1166.55	499.401
1167.24	515.335
1167.93	511.14
1168.62	488.871
1169.31	504.652
1170	528.771
1170.7	531.178
1171.39	563.235
1172.08	578.556
1172.77	546.135
1173.46	558.362
1174.15	585.11
1174.85	634.436
1175.54	648.456
1176.23	612.878
1176.92	642.406
1177.61	680.442
1178.3	685.192
1179	666.797
1179.69	647.805
1180.38	671.744
1181.07	698.242
1181.76	749.142
1182.45	776.187
1183.15	798.702
1183.84	823.317
1184.53	801.984
1185.22	833.278
1185.91	816.467
1186.6	894.228
1187.3	866.281
1187.99	898.143
1188.68	921.613
1189.37	882.639
1190.06	980.165
1190.75	996.027
1191.45	1014.46
1192.14	1054.12
1192.83	1105.07
1193.52	1116.21
1194.21	1118.74
1194.9	1081.53
1195.6	1112.91
1196.29	1134.86
1196.98	1221.08
1197.67	1239.08
1198.36	1246.12
1199.05	1278.7
1199.75	1258.64
1200.44	1311.68
1201.13	1344.35
1201.82	1364.54
1202.51	1325.76
1203.2	1353.51
1203.9	1391.14
1204.59	1407.72
1205.28	1423.95
1205.97	1428.93
1206.66	1445.49
1207.35	1471
1208.05	1450.85
1208.74	1433.32
1209.43	1458.35
1210.12	1456.16
1210.81	1421.46
1211.5	1408.66
1212.2	1368.32
1212.89	1372.86
1213.58	1435.93
1214.27	1379.97
1214.96	1371.37
1215.65	1365.66
1216.35	1327.82
1217.04	1315.24
1217.73	1263.77
1218.42	1289.52
1219.11	1296.67
1219.8	1243.96
1220.5	1263.77
1221.19	1246.06
1221.88	1248.56
1222.57	1244.2
1223.26	1198.33
1223.95	1208.76
1224.64	1228.22
1225.34	1227.83
1226.03	1226.55
1226.72	1202.53
1227.41	1145.21
1228.1	1135.6
1228.8	1206.14
1229.49	1187.65
1230.18	1116.26
1230.87	1128.16
1231.56	1135.26
1232.25	1117.8
1232.95	1116.46
1233.64	1110.7
1234.33	1111.83
1235.02	1114.73
1235.71	1123.97
1236.4	1089.9
1237.1	1104.49
1237.79	1108.88
1238.48	1057.45
1239.17	999.661
1239.86	1042.16
1240.55	1098.66
1241.24	1067.77
1241.94	1115.1
1242.63	1046.16
1243.32	973.032
1244.01	959.966
1244.7	984.523
1245.39	995.221
1246.09	967.512
1246.78	1011.05
1247.47	1017
1248.16	971.721
1248.85	972.986
1249.54	950.914
1250.24	998.155
1250.93	1036.95
1251.62	984.022
1252.31	999.788
1253	1000.09
1253.69	1007.76
1254.39	992.965
1255.08	994.806
1255.77	1018.57
1256.46	1005.33
1257.15	1001.69
1257.85	1005
1258.54	1010.61
1259.23	992.504
1259.92	1003.62
1260.61	998.87
1261.3	978.648
1261.99	980.629
1262.69	992.705
1263.38	1031.55
1264.07	1041.01
1264.76	1015.2
1265.45	1087.69
1266.14	1125.87
1266.84	1095.33
1267.53	1066.65
1268.22	1080.31
1268.91	1167.74
1269.6	1146.04
1270.29	1147.56
1270.99	1159.24
1271.68	1129.5
1272.37	1181.7
1273.06	1193.57
1273.75	1226.34
1274.44	1262.49
1275.14	1342.09
1275.83	1304.61
1276.52	1289.33
1277.21	1285.17
1277.9	1294.4
1278.59	1286.31
1279.29	1336.96
1279.98	1393.57
1280.67	1345.58
1281.36	1342.14
1282.05	1413.99
1282.74	1429.79
1283.44	1407.42
1284.13	1386.3
1284.82	1401.8
1285.51	1446.53
1286.2	1483.19
1286.89	1520.22
1287.59	1479.54
1288.28	1527.14
1288.97	1534.76
1289.66	1460.67
1290.35	1478.76
1291.04	1529.74
1291.74	1515.35
1292.43	1470.43
1293.12	1463.95
1293.81	1515.09
1294.5	1503.62
1295.19	1492.14
1295.89	1461.39
1296.58	1456.85
1297.27	1466.62
1297.96	1451.66
1298.65	1503.38
1299.34	1521.65
1300.04	1525.33
1300.73	1528.15
1301.42	1451.78
1302.11	1454.12
1302.8	1468.77
1303.49	1437.83
1304.19	1403.13
1304.88	1404.44
1305.57	1409.81
1306.26	1423.72
1306.95	1371.61
1307.64	1358.48
1308.34	1387.74
1309.03	1392.49
1309.72	1373.17
1310.41	1361.83
1311.1	1303.96
1311.79	1307.2
1312.49	1291.11
1313.18	1267.38
1313.87	1292.47
1314.56	1314.44
1315.25	1249.73
1315.94	1264.79
1316.64	1277.07
1317.33	1248.4
1318.02	1233.19
1318.71	1283.46
1319.4	1238.92
1320.09	1234.34
1320.79	1177.42
1321.48	1233.03
1322.17	1211.65
1322.86	1233.34
1323.55	1182.57
1324.24	1168.34
1324.94	1202.65
1325.63	1158.1
1326.32	1170.55
1327.01	1211.78
1327.7	1154.18
1328.39	1149.24
1329.09	1166.82
1329.78	1195.68
1330.47	1190.68
1331.16	1133.59
1331.85	1142.86
1332.54	1149.39
1333.24	1146.7
1333.93	1111.45
1334.62	1163.21
1335.31	1153.79
1336	1133.02
1336.69	1103.2
1337.39	1075.67
1338.08	1046.03
1338.77	1064.25
1339.46	1077.55
1340.15	1068.6
1340.84	1038.64
1341.54	1045.12
1342.23	1013.78
1342.92	995.237
1343.61	967.523
1344.3	990.564
1344.99	954.451
1345.69	971.986
1346.38	959.869
1347.07	920.142
1347.76	849.835
1348.45	846.509
1349.14	884.836
1349.84	891.354
1350.53	889.68
1351.22	842.823
1351.91	839.667
1352.6	816.519
1353.29	804.593
1353.99	788.207
1354.68	786.42
1355.37	794.572
1356.06	779.679
1356.75	755.167
1357.44	725.133
1358.14	710.092
1358.83	724.03
1359.52	680.515
1360.21	690.579
1360.9	718.521
1361.59	716.243
1362.29	673.509
1362.98	658.67
1363.67	717.372
1364.36	686.661
1365.05	667.508
1365.74	656.609
1366.44	661.881
1367.13	668.948
1367.82	612.423
1368.51	641.504
1369.2	652.984
1369.89	646.778
1370.59	610.979
1371.28	612.119
1371.97	625.036
1372.66	627.263
1373.35	611.76
1374.04	600.84
1374.74	631.194
1375.43	602.794
1376.12	568.051
1376.81	577.821
1377.5	609.019
1378.19	609.359
1378.89	584.101
1379.58	620.735
1380.27	578.791
1380.96	592.618
1381.65	613.312
1382.34	604.523
1383.04	597.858
1383.73	597.071
1384.42	602.403
1385.11	591.912
1385.8	610.499
1386.49	631.879
1387.19	644.108
1387.88	635.836
1388.57	626.724
1389.26	640.644
1389.95	623.254
1390.64	637.733
1391.34	613.459
1392.03	609.757
1392.72	662.45
1393.41	647.756
1394.1	627.909
1394.79	649.231
1395.49	659.674
1396.18	671.686
1396.87	706.282
1397.56	672.229
1398.25	658.688
1398.94	683.196
1399.64	721.775
1400.33	687.738
1401.02	680.41
1401.71	696.768
1402.4	713.585
1403.09	727.019
1403.79	755.111
1404.48	754.064
1405.17	743.268
1405.86	745.084
1406.55	743.914
1407.24	735.729
1407.94	751.304
1408.63	775.054
1409.32	761.928
1410.01	779.961
1410.7	804.91
1411.39	800.762
1412.09	788.365
1412.78	791.645
1413.47	796.664
1414.16	802.054
1414.85	816.042
1415.54	823.035
1416.24	839.359
1416.93	825.311
1417.62	814.466
1418.31	834.079
1419	846.854
1419.69	850.684
1420.39	859.978
1421.08	851.541
1421.77	789.512
1422.46	876.169
1423.15	820.524
1423.84	851.329
1424.54	815.708
1425.23	841.124
1425.92	840.984
1426.61	850.371
1427.3	838.965
1427.99	826.961
1428.69	839.722
1429.38	844.796
1430.07	834.008
1430.76	836.75
1431.45	852.401
1432.14	841.266
1432.84	835.71
1433.53	860.883
1434.22	836.691
1434.91	838.878
1435.6	807.68
1436.29	823.356
1436.99	818.073
1437.68	808.539
1438.37	780.634
1439.06	793.477
1439.75	799.584
1440.44	814.309
1441.14	803.232
1441.83	779.687
1442.52	775.713
1443.21	759.931
1443.9	732.258
1444.59	740.389
1445.29	726.487
1445.98	713.482
1446.67	695.752
1447.36	688.176
1448.05	669.853
1448.74	671.317
1449.44	701.045
1450.13	677.746
1450.82	688.541
1451.51	634.944
1452.2	674.599
1452.89	674.402
1453.59	640.779
1454.28	623.635
1454.97	656.907
1455.66	671.107
1456.35	637.426
1457.04	658.091
1457.74	646.086
1458.43	650.233
1459.12	654.209
1459.81	638.55
1460.5	623.042
1461.19	624.649
1461.89	626.588
1462.58	631.423
1463.27	632.723
1463.96	646.604
1464.65	648.291
1465.34	629.477
1466.04	609.182
1466.73	647.256
1467.42	632.713
1468.11	639.855
1468.8	631.817
1469.49	655.661
1470.19	638.651
1470.88	673.042
1471.57	684.522
1472.26	631.169
1472.95	629.451
1473.64	628.939
1474.34	647.96
1475.03	651.586
1475.72	645.448
1476.41	601.698
1477.1	633.953
1477.79	623.642
1478.49	668.728
1479.18	654.51
1479.87	639.961
1480.56	645.177
1481.25	644.744
1481.94	640.389
1482.64	625.585
[truncated: 748 more rows]

## Sheet: VTL1_784_pos1_darkredfill
100	251.976
100.692	152.73
101.383	142.547
102.075	133.443
102.767	172.137
103.458	196.307
104.15	168.665
104.842	247.345
105.533	215.157
106.225	162.596
106.917	116.579
107.608	132.178
108.3	173.399
108.992	105.804
109.683	183.069
110.375	131.523
111.067	131.191
111.758	115.617
112.45	106.731
113.142	188.647
113.833	199.07
114.525	100.695
115.217	134.69
115.908	175.925
116.6	223.401
117.292	283.896
117.983	209.017
118.675	177.9
119.367	244.851
120.058	200.784
120.75	161.358
121.442	213.384
122.133	265.146
122.825	169.06
123.517	213.533
124.208	252.14
124.9	267.883
125.592	258.373
126.283	232.873
126.975	234.051
127.667	234.743
128.358	252.678
129.05	250.501
129.742	273.909
130.433	317.752
131.125	283.847
131.817	381.809
132.508	345.986
133.2	363.706
133.892	364.943
134.583	358.539
135.275	403.329
135.967	387.374
136.658	383.006
137.35	382.459
138.042	373.64
138.733	434.086
139.425	537.477
140.116	484.371
140.808	479.657
141.5	560.815
142.191	519.312
142.883	497.274
143.575	520.309
144.266	514.48
144.958	550.208
145.65	443.423
146.341	479.326
147.033	487.01
147.725	457.933
148.416	461.883
149.108	545.052
149.8	518.905
150.491	531.64
151.183	536.167
151.875	585.061
152.566	636.366
153.258	634.862
153.95	668.406
154.641	703.972
155.333	663.517
156.025	642.75
156.716	704.112
157.408	767.609
158.1	695.031
158.791	728.087
159.483	804.21
160.175	751.886
160.866	731.768
161.558	775.573
162.25	826.743
162.941	835.379
163.633	914.382
164.325	887.634
165.016	952.327
165.708	971.555
166.4	926.793
167.091	927.65
167.783	1041.84
168.475	976.309
169.166	987.015
169.858	1083.52
170.55	1106.36
171.241	1050.42
171.933	1075.64
172.625	1073.92
173.316	984.865
174.008	1055.78
174.7	1054.31
175.391	1045.71
176.083	1102.82
176.775	1105.6
177.466	1116.69
178.158	1059.24
178.85	1028.55
179.541	1050.05
180.233	1069.58
180.925	1045.99
181.616	1041.51
182.308	968.637
183	1082.31
183.691	1015.53
184.383	1008.76
185.075	1116.31
185.766	1167.14
186.458	1073.7
187.15	1095.59
187.841	1043.6
188.533	1071.36
189.225	1138.68
189.916	1153.21
190.608	1102
191.3	1204.54
191.991	1125.49
192.683	1061.5
193.375	1103.98
194.066	1157.28
194.758	1177.42
195.45	1219.11
196.141	1179.56
196.833	1232.29
197.525	1288.18
198.216	1244.09
198.908	1249.12
199.6	1342.44
200.291	1355.57
200.983	1454.42
201.675	1486.05
202.366	1415.9
203.058	1445.52
203.75	1510.85
204.441	1519
205.133	1529.58
205.825	1641.51
206.516	1604.65
207.208	1579.25
207.9	1608.86
208.591	1639.16
209.283	1659.06
209.975	1740.02
210.666	1689.09
211.358	1730.73
212.05	1718.5
212.741	1783.03
213.433	1815.44
214.125	1770.98
214.816	1822.42
215.508	1754.02
216.199	1934.64
216.891	1893.36
217.583	1812.05
218.274	1725.39
218.966	1706.64
219.658	1919.35
220.349	1980.53
221.041	1982.77
221.733	2047.7
222.424	2080.98
223.116	2070.79
223.808	2065.41
224.499	2094.03
225.191	2014.76
225.883	2113.88
226.574	2053.19
227.266	2013.1
227.958	1956.25
228.649	1883.57
229.341	1898.12
230.033	1858.3
230.724	1973.1
231.416	1913.09
232.108	1939.38
232.799	1984.4
233.491	1985.96
234.183	1984.13
234.874	1922.74
235.566	1886.38
236.258	2019.93
236.949	1970.92
237.641	1987.34
238.333	2084.72
239.024	2047.92
239.716	1965.26
240.408	2101.21
241.099	2113.11
241.791	2108.41
242.483	2211.5
243.174	2271.85
243.866	2218.13
244.558	2402.72
245.249	2310.59
245.941	2310.6
246.633	2365.39
247.324	2367.62
248.016	2402.65
248.708	2500.53
249.399	2514.07
250.091	2641.7
250.783	2627.72
251.474	2581.05
252.166	2677.26
252.858	2775.61
253.549	2804.06
254.241	2858.43
254.933	2870.46
255.624	2945.32
256.316	2695.59
257.008	2831.02
257.699	3017.75
258.391	3052.25
259.083	3051.36
259.774	3085.93
260.466	3120.27
261.158	3177.03
261.849	3229.89
262.541	3234.78
263.233	3220.66
263.924	3214.64
264.616	3203.41
265.308	3294.05
265.999	3154.52
266.691	3272.27
267.383	3267.72
268.074	3223.81
268.766	3179.53
269.458	3078.34
270.149	3177.13
270.841	3320.11
271.533	3290.98
272.224	3209.41
272.916	3128.93
273.608	3129.28
274.299	3188.59
274.991	3151.73
275.683	3244
276.374	3168.31
277.066	2987.02
277.758	3009.37
278.449	3074.89
279.141	3066.82
279.833	3075
280.524	3094.23
281.216	3095.34
281.908	3055.22
282.599	3036.88
283.291	3043.42
283.983	3116.62
284.674	3184.14
285.366	3077.7
286.058	3235.27
286.749	3112.52
287.441	3042.98
288.133	3130.1
288.824	3246.3
289.516	3303.2
290.207	3309.85
290.899	3263.49
291.591	3261.5
292.283	3249.76
292.974	3306.08
293.666	3321.89
294.357	3294.24
295.049	3277.92
295.741	3286.16
296.432	3234.27
297.124	3018.83
297.816	3072.35
298.507	3159.94
299.199	3166.33
299.891	3092.46
300.582	3010.09
301.274	2990.96
301.966	3031.52
302.657	2999.46
303.349	2849.05
304.041	2902.99
304.732	2895.75
305.424	2808.32
306.116	2820.61
306.807	2748.22
307.499	2685.13
308.191	2617.97
308.882	2606.63
309.574	2568.39
310.266	2553.05
310.957	2518.11
311.649	2394.27
312.341	2422.61
313.032	2400.55
313.724	2354.8
314.416	2369.6
315.107	2327.09
315.799	2243.9
316.491	2187.35
317.182	2170.58
317.874	2162.84
318.566	2092.18
319.257	2079.18
319.949	2069.38
320.641	1997.92
321.332	1975.42
322.024	2003.24
322.716	1917.28
323.407	1923.85
324.099	1899.02
324.791	1841.02
325.482	1844.47
326.174	1810.82
326.866	1750.86
327.557	1731.92
328.249	1744.38
328.941	1678.49
329.632	1572.34
330.324	1584.59
331.016	1597.06
331.707	1574.96
332.399	1546.12
333.091	1568.52
333.782	1641.31
334.474	1549.52
335.166	1392.56
335.857	1571.76
336.549	1563.9
337.241	1523.2
337.932	1501.25
338.624	1434.74
339.316	1368.48
340.007	1544.85
340.699	1467.6
341.391	1448.67
342.082	1423.76
342.774	1472.89
343.466	1463.48
344.157	1400.21
344.849	1442.66
345.541	1275.75
346.232	1405.82
346.924	1408.1
347.616	1364.24
348.307	1307.45
348.999	1261.67
349.691	1329.22
350.382	1528.99
351.074	1502.02
351.766	1364.92
352.457	1412.78
353.149	1413.44
353.841	1334.49
354.532	1321.38
355.224	1363.41
355.916	1335.7
356.607	1311.74
357.299	1469.46
357.991	1379.85
358.682	1398.58
359.374	1463.28
360.066	1443.62
360.757	1418.3
361.449	1468.64
362.14	1445.57
362.832	1354.91
363.524	1391.52
364.216	1372.49
364.907	1369.24
365.599	1442.76
366.291	1442.42
366.982	1365.1
367.674	1417.95
368.365	1465.99
369.057	1406.44
369.749	1362.76
370.44	1342.16
371.132	1381.15
371.824	1393.95
372.515	1365.22
373.207	1332.27
373.899	1262.02
374.59	1405.65
375.282	1459.44
375.974	1369.26
376.665	1359.14
377.357	1343.19
378.049	1321.24
378.74	1341.57
379.432	1367.33
380.124	1367.87
380.815	1300.73
381.507	1368.45
382.199	1344.37
382.89	1320.67
383.582	1316.28
384.274	1297.97
384.965	1254.49
385.657	1230.96
386.349	1321.13
387.04	1270.72
387.732	1253.32
388.424	1264.43
389.115	1304.95
389.807	1338.65
390.499	1340.47
391.19	1314.38
391.882	1243.35
392.574	1299.47
393.265	1296.18
393.957	1285.82
394.649	1302.12
395.34	1310.51
396.032	1312.13
396.724	1324.79
397.415	1318.37
398.107	1263.43
398.799	1337.09
399.49	1371.57
400.182	1326.26
400.874	1286.12
401.565	1311.12
402.257	1346.91
402.949	1309.1
403.64	1252.65
404.332	1366.59
405.024	1274
405.715	1327.07
406.407	1345.98
407.099	1302.91
407.79	1300.45
408.482	1298.12
409.174	1211.06
409.865	1252.54
410.557	1288.48
411.249	1178.25
411.94	1199.77
412.632	1108.96
413.324	1104.55
414.015	1101.53
414.707	1052.6
415.399	1098.44
416.09	1110.41
416.782	970.85
417.474	974.195
418.165	1049.27
418.857	1113.4
419.549	1077.25
420.24	1029.18
420.932	1000.71
421.624	920.778
422.315	922.745
423.007	1063.05
423.699	918.295
424.39	1029.8
425.082	934.274
425.774	891.693
426.465	946.042
427.157	974.565
427.849	952.012
428.54	904.733
429.232	979.689
429.924	958.942
430.615	1018.4
431.307	991.081
431.999	953.493
432.69	927.855
433.382	898.055
434.074	880.488
434.765	899.853
435.457	923.619
436.149	890.653
436.84	907.189
437.532	944.174
438.224	968.337
438.915	947.321
439.607	915.89
440.298	921.97
440.99	929.792
441.682	906.514
442.373	705.067
443.065	900.281
443.757	970
444.448	858.797
445.14	819.136
445.832	888.046
446.523	879.857
447.215	758.702
447.907	819.095
448.598	851.593
449.29	768.552
449.982	717.364
450.673	776.203
451.365	794.265
452.057	791.926
452.748	823.058
453.44	847.654
454.132	870.075
454.823	820.864
455.515	822.217
456.207	866.912
456.898	848.959
457.59	765.968
458.282	781.632
458.973	833.376
459.665	804.994
460.357	819.927
461.048	810.344
461.74	734.774
462.432	756.055
463.123	706.168
463.815	787.073
464.507	842.982
465.198	796.622
465.89	725.831
466.582	737.129
467.273	838.648
467.965	783.614
468.657	721.011
469.348	791.884
470.04	896.117
470.732	909.697
471.423	854.776
472.115	817.156
472.807	841.618
473.498	890.521
474.19	884.988
474.882	825.151
475.573	863.97
476.265	855.198
476.957	776.232
477.648	805.689
478.34	825.284
479.032	799.655
479.723	827.882
480.415	866.39
481.107	786.09
481.798	866.507
482.49	840.616
483.182	839.313
483.873	810.35
484.565	797.446
485.257	750.041
485.948	751.009
486.64	827.688
487.332	743.055
488.023	648.246
488.715	879.852
489.407	772.301
490.098	796.932
490.79	790.414
491.482	769.889
492.173	739.852
492.865	693.436
493.557	699.511
494.248	790.248
494.94	645.568
495.632	586.311
496.323	628.376
497.015	677.061
497.707	638.957
498.398	602.499
499.09	655.626
499.782	681.12
500.473	608.926
501.165	620.681
501.857	673.153
502.548	548.41
503.24	583.71
503.932	574.415
504.623	562.164
505.315	564.177
506.007	582.286
506.698	591.05
507.39	562.942
508.082	510.492
508.773	490.329
509.465	546.727
510.157	477.747
510.848	510.158
511.54	462.299
512.232	435.054
512.923	440.516
513.615	457.581
514.307	459.253
514.998	429.968
515.69	407.592
516.382	425.841
517.073	400.585
517.765	316.554
518.456	423.46
519.148	375.849
519.84	332.385
520.531	353.179
521.223	340.997
521.915	305.05
522.607	347.501
523.298	293.632
523.99	270.214
524.681	315.769
525.373	347.565
526.065	331.263
526.756	349.983
527.448	277.741
528.14	242.258
528.831	299.875
529.523	325.422
530.215	378.98
530.906	320.829
531.598	307.061
532.29	335.97
532.981	278.701
533.673	301.913
534.365	282.25
535.056	225.856
535.748	210.172
536.44	258.391
537.131	312.79
537.823	294.873
538.515	260.667
539.206	255.878
539.898	257.126
540.59	247.226
541.281	264.264
541.973	241.736
542.665	180.789
543.356	179.325
544.048	245.85
544.74	252.393
545.431	205.815
546.123	275.578
546.815	261.254
547.506	293.469
548.198	266.907
548.89	246.927
549.581	262.665
550.273	274.759
550.965	279.903
551.656	254.768
552.348	185.066
553.04	225.601
553.731	252.207
554.423	268.074
555.115	181.638
555.806	232.29
556.498	232.658
557.19	222.675
557.881	228.784
558.573	223.576
559.265	188.249
559.956	156.432
560.648	176.644
561.34	192.065
562.031	167.714
562.723	163.82
563.415	80.1218
564.106	91.7928
564.798	150.693
565.49	170.827
566.181	129.638
566.873	122.304
567.565	185.553
568.256	185.803
568.948	177.354
569.64	187.384
570.331	152.837
571.023	162.484
571.715	164.992
572.406	104.765
573.098	136.855
573.79	203.668
574.481	217.424
575.173	160.772
575.865	114.562
576.556	249.437
577.248	135.307
577.94	142.511
578.631	126.011
579.323	160.78
580.015	141.414
580.706	136.641
581.398	184.953
582.09	179.557
582.781	115.572
583.473	123.667
584.165	192.03
584.856	158.346
585.548	223.964
586.24	183.678
586.931	169.367
587.623	125.476
588.315	213.656
589.006	276.474
589.698	260.908
590.39	207.702
591.081	169.725
591.773	180.101
592.464	206.554
593.156	161.046
593.848	225.97
594.539	263.374
595.231	173.962
595.923	227.12
596.615	199.138
597.306	203.339
597.998	197.658
598.689	200.991
599.381	218.99
600.073	225.513
600.764	264.976
601.456	275.336
602.148	244.99
602.839	289.587
603.531	233.26
604.223	252.464
604.914	276.35
605.606	299.672
606.298	300.183
606.989	295.827
607.681	308.077
608.373	321.228
609.064	307.355
609.756	277.798
610.448	302.069
611.139	253.876
611.831	257.478
612.523	278.134
613.214	193.756
613.906	258.244
614.598	293.865
615.289	234.333
615.981	229.909
616.673	291.76
617.364	298.676
618.056	294.219
618.748	292.793
619.439	341.462
620.131	290.049
620.823	274
621.514	298.927
622.206	329.08
622.898	271.648
623.589	270.874
624.281	290.44
624.973	254.445
625.664	219.818
626.356	229.423
627.048	229.865
627.739	277.984
628.431	232.274
629.123	232.208
629.814	203.413
630.506	233.044
631.198	262.334
631.889	236.494
632.581	231.718
633.273	273.975
633.964	253.637
634.656	243.965
635.348	332.496
636.039	240.62
636.731	249.801
637.423	260.947
638.114	269.175
638.806	289.832
639.498	261.426
640.189	283.463
640.881	328.864
641.573	334.563
642.264	270.129
642.956	228.122
643.648	256.299
644.339	295.469
645.031	316.679
645.723	255.125
646.414	253.633
647.106	308.117
647.798	268.195
648.489	287.366
649.181	298.42
649.873	305.691
650.564	249.432
651.256	299.762
651.948	357.686
652.639	317.734
653.331	274.721
654.023	265.431
654.714	269.63
655.406	290.971
656.098	357.165
656.789	296.658
657.481	310.152
658.173	291.371
658.864	267.929
659.556	331.338
660.248	342.454
660.939	327.13
661.631	316.259
662.323	290.454
663.014	288.47
663.706	348.051
664.398	389.557
665.089	321.258
665.781	259.388
666.473	338
667.164	305.081
667.856	322.674
668.547	334.705
669.239	313.065
669.931	353.758
670.622	377.724
671.314	357.282
672.006	341.892
672.698	341.218
673.389	335.768
674.081	311.632
674.772	313.538
675.464	307.658
676.156	325.782
676.847	319.544
677.539	330
678.231	373.663
678.922	347.819
679.614	328.554
680.306	319.872
680.997	331.42
681.689	390.577
682.381	418.374
683.072	388.948
683.764	426.247
684.456	378.476
685.147	308.605
685.839	345.971
686.531	340.915
687.222	275.696
687.914	321.538
688.606	417.966
689.297	408.225
689.989	351.717
690.681	335.577
691.372	337.094
692.064	346.705
692.756	353.994
693.447	347.909
694.139	371.972
694.831	308.614
695.522	335.586
696.214	322.986
696.906	301.836
697.597	264.035
698.289	343.28
698.981	282.131
699.672	321.053
700.364	362.046
701.056	329.408
701.747	297.109
702.439	286.051
703.131	285.509
703.822	308.538
704.514	303.149
705.206	280.189
705.897	343.31
706.589	305.17
707.281	365.82
707.972	292.52
708.664	323.719
709.356	288.179
710.047	256.053
710.739	245.335
711.431	253.409
712.122	269.148
712.814	251.109
713.506	246.126
714.197	269.94
714.889	237.001
715.581	200.006
716.272	220.159
716.964	244.729
717.656	197.933
718.347	261.211
719.039	305.173
719.731	286.391
720.422	228.844
721.114	261.545
721.806	208.671
722.497	209.169
723.189	248.824
723.881	262.509
724.572	256.595
725.264	241.145
725.956	227.075
726.647	223.618
727.339	206.391
728.031	215.734
728.722	269.177
729.414	189.711
730.106	218.259
730.797	146.534
731.489	202.191
732.181	207.618
732.872	248.063
733.564	219.258
734.256	197.189
734.947	226.691
735.639	239.084
736.331	214.111
737.022	197.635
737.714	196.465
738.406	193.133
739.097	201.808
739.789	227.754
740.481	209.145
741.172	169.109
741.864	158.49
742.556	206.275
743.247	238.756
743.939	164.151
744.63	193.141
745.322	181.043
746.014	164.973
746.706	170.651
747.397	189.851
748.089	187.16
748.781	142.869
749.472	130.577
750.164	181.001
750.855	201.834
751.547	189.25
752.239	126.732
752.93	177.624
753.622	153.429
754.314	161.177
755.005	201.988
755.697	154.326
756.389	135.789
757.08	188.557
757.772	151.273
758.464	161.868
759.155	215.358
759.847	228.833
760.539	207.542
761.23	183.925
761.922	179.572
762.614	179.356
763.305	161.98
763.997	151.306
764.689	176.984
765.38	143.314
766.072	232.639
766.764	184.876
767.455	168.975
768.147	130.21
768.839	165.855
769.53	159.506
770.222	136.857
770.914	183.774
771.605	203.345
772.297	170.379
772.989	161.563
773.68	190.96
774.372	198.221
775.064	175.648
775.755	162.499
776.447	120.02
777.139	204.861
777.83	132.258
778.522	191.043
779.214	169.973
779.905	182.711
780.597	185.068
781.289	168.008
781.98	138.687
782.672	121.644
783.364	150.284
784.055	179.869
784.747	178.389
785.439	154.523
786.13	155.25
786.822	160.925
787.514	145.697
788.205	139.009
788.897	123.495
789.589	115.187
790.28	146.227
790.972	154.658
791.664	131.25
792.355	162.919
793.047	121.808
793.739	183.516
794.43	51.5669
795.122	118.096
795.814	181.62
796.505	195.663
797.197	127.013
797.889	133.481
798.58	166.463
799.272	202.954
799.964	175.616
800.655	147.977
801.347	181.504
802.039	189.032
802.73	178.088
803.422	154.383
804.114	172.785
804.805	151.738
805.497	162.422
806.189	173.2
806.88	177.042
807.572	181.976
808.264	161.156
808.955	165.531
809.647	165.215
810.339	147.374
811.03	173.594
811.722	163.792
812.414	161.801
813.105	187.086
813.797	196.912
814.489	175.608
815.18	183.142
815.872	167.046
816.564	149.679
817.255	161.552
817.947	193.887
818.638	198.088
819.33	173.608
820.022	135.174
820.713	170.555
821.405	159.119
822.097	149.289
822.789	183.658
823.48	117.49
824.172	144.457
824.863	143.156
825.555	186.984
826.247	192.552
826.938	171.406
827.63	177.838
828.322	174.42
829.013	160.832
829.705	182.275
830.397	177.131
831.088	168.714
831.78	164.58
832.472	165.076
833.163	176.398
833.855	165.201
834.547	179.101
835.238	171.53
835.93	151.281
836.622	169.629
837.313	193.28
838.005	188.163
838.697	186.856
839.388	174.333
840.08	180.015
840.772	177.127
841.463	176.804
842.155	192.639
842.847	189.924
843.538	206.294
844.23	168.57
844.922	147.715
845.613	178.439
846.305	196.084
846.997	180.815
847.688	170.791
848.38	195.2
849.072	216.075
849.763	226.836
850.455	204.483
851.147	185.295
851.838	184.784
852.53	181.919
853.222	202.494
853.913	208.408
854.605	220.383
855.297	223.483
855.988	215.046
856.68	223.078
857.372	193.612
858.063	222.326
858.755	228.661
859.447	224.42
860.138	235.609
860.83	194.88
861.522	253.396
862.213	243.666
862.905	196.166
863.597	215.483
864.288	195.125
864.98	211.927
865.672	206.094
866.363	217.155
867.055	204.763
867.747	170.669
868.438	179.203
869.13	206.951
869.822	228.079
870.513	249.954
871.205	250.118
871.897	221.462
872.588	237.673
873.28	207.753
873.972	218.748
874.663	225.716
875.355	247.639
876.047	234.003
876.738	259.461
877.43	229.145
878.122	228.046
878.813	203.203
879.505	240.599
880.197	220.647
880.888	192.386
881.58	227.869
882.272	219.653
882.963	246.859
883.655	261.65
884.347	249.881
885.038	253.058
885.73	248.04
886.422	235.53
887.113	240.027
887.805	251.368
888.497	251.939
889.188	226.671
889.88	214.058
890.572	218.055
891.263	254.021
891.955	262.686
892.647	229.536
893.338	243.33
894.03	234.37
894.721	190.485
895.413	271.105
896.105	218.359
896.797	240.919
897.488	288.905
898.18	253.196
898.872	217.039
899.563	262.768
900.255	262.274
900.946	241.771
901.638	239.72
902.33	264.776
903.021	270.36
903.713	213.608
904.405	201.882
905.096	237.215
905.788	263.829
906.48	282.768
907.171	265.789
907.863	282.06
908.555	251.667
909.246	255.354
909.938	275.331
910.63	292.45
911.321	296.112
912.013	316.877
912.705	312.767
913.396	280.181
914.088	287.208
914.78	280.828
915.471	235.926
916.163	266.25
916.855	271.576
917.546	331.42
918.238	276.744
918.93	281.56
919.621	297.836
920.313	285.895
921.005	302.169
921.696	292.206
922.388	285.546
923.08	286.397
923.771	316.376
924.463	330.295
925.155	313.771
925.846	279.951
926.538	277.908
927.23	311.064
927.921	283.338
928.613	264.082
929.305	307.788
929.996	334.661
930.688	348.294
931.38	317.989
932.071	346.817
932.763	332.742
933.455	341.822
934.146	339.663
934.838	311.317
935.53	370.941
936.221	301.794
936.913	356.478
937.605	331.371
938.296	346.704
938.988	333.536
939.68	382.416
940.371	315.035
941.063	381.633
941.755	350.174
942.446	355.867
943.138	348.597
943.83	376.023
944.521	378.68
945.213	376.428
945.905	376.794
946.596	379.938
947.288	377.485
947.98	380.471
948.671	391.497
949.363	393.153
950.055	388.477
950.746	394.279
951.438	414.6
952.13	419.493
952.821	413.555
953.513	443.213
954.205	459.971
954.896	466.487
955.588	486.87
956.28	475.495
956.971	481.494
957.663	509.314
958.355	544.132
959.046	528.486
959.738	565.187
960.43	587.472
961.121	607.309
961.813	628.927
962.505	669.833
963.196	591.005
963.888	618.885
964.58	641.096
965.271	594.152
965.963	572.878
966.655	545.917
967.346	566.013
968.038	566.582
968.73	508.396
969.421	522.703
970.113	507.974
970.804	502.592
971.496	493.759
972.188	508.419
972.88	480.178
973.571	468.941
974.263	482.237
974.954	469.982
975.646	435.623
976.338	456.668
977.029	478.443
977.721	489.33
978.413	507.757
979.104	495.435
979.796	480.716
980.488	478.746
981.179	473.855
981.871	449.966
982.563	453.559
983.254	508.643
983.946	495.506
984.638	506.385
985.329	514.014
986.021	499.262
986.713	481.944
987.404	527.388
988.096	536.023
988.788	519.21
989.479	554.739
990.171	533.215
990.863	530.429
991.554	541.592
992.246	556.71
992.938	592.501
993.629	587.304
994.321	555.97
995.013	591.853
995.704	572.558
996.396	491.558
997.088	558.319
997.779	610.474
998.471	535.549
999.163	590.363
999.854	621.89
1000.55	553.224
1001.24	637.766
1001.93	605.353
1002.62	580.138
1003.31	590.387
1004	587.662
1004.7	628.991
1005.39	591.163
1006.08	625.664
1006.77	640.256
1007.46	550.873
1008.15	607.037
1008.85	637.136
1009.54	639.413
1010.23	683.617
1010.92	678.736
1011.61	622.855
1012.3	626.469
1013	678.242
1013.69	704.384
1014.38	699.554
1015.07	706.037
1015.76	694.051
1016.45	681.546
1017.15	680.264
1017.84	698.725
1018.53	681.73
1019.22	679.596
1019.91	751.309
1020.6	768.866
1021.3	757.834
1021.99	745.626
1022.68	780.038
1023.37	753.428
1024.06	751.753
1024.75	789.666
1025.45	771.574
1026.14	782.841
1026.83	810.28
1027.52	802.099
1028.21	855.621
1028.9	848.417
1029.6	833.603
1030.29	856.23
1030.98	857.662
1031.67	840.687
1032.36	826.943
1033.05	835.012
1033.75	865.622
1034.44	874.28
1035.13	879.745
1035.82	878.288
1036.51	908.411
1037.2	910.657
1037.9	906.293
1038.59	897.976
1039.28	942.918
1039.97	930.017
1040.66	994.466
1041.35	939.667
1042.05	934.719
1042.74	972.096
1043.43	968.282
1044.12	963.73
1044.81	974.268
1045.5	930.451
1046.2	989.584
1046.89	1027.46
1047.58	995.997
1048.27	997.399
1048.96	1053.96
1049.65	968.949
1050.35	1011.32
1051.04	1042.83
1051.73	1080.34
1052.42	1085.45
1053.11	1030.09
1053.8	1039.2
1054.5	1106.93
1055.19	1086.6
1055.88	1055.75
1056.57	1128.73
1057.26	1163.95
1057.95	1157.96
1058.65	1165.95
1059.34	1179.42
1060.03	1190.06
1060.72	1203.39
1061.41	1215.44
1062.1	1306.98
1062.8	1285.23
1063.49	1278.06
1064.18	1331.48
1064.87	1361.08
1065.56	1385.35
1066.25	1394.92
1066.95	1421.75
1067.64	1350.34
1068.33	1438.88
1069.02	1466.37
1069.71	1490.99
1070.4	1547.5
1071.1	1604.19
1071.79	1564.58
1072.48	1610.67
1073.17	1666.13
1073.86	1661.12
1074.55	1698.54
1075.25	1786.61
1075.94	1770.44
1076.63	1777.85
1077.32	1785.29
1078.01	1830.99
1078.7	1829.61
1079.4	1788.02
1080.09	1762.64
1080.78	1774.61
1081.47	1781.72
1082.16	1811.4
1082.85	1867.97
1083.55	1839.15
1084.24	1839.91
1084.93	1878.83
1085.62	1883.68
1086.31	1875.37
1087	1889.52
1087.7	1890.44
1088.39	1907.25
1089.08	1906.5
1089.77	1833.85
1090.46	1883.01
1091.15	1901.68
1091.85	1935.7
1092.54	1958.75
1093.23	1963.43
1093.92	2002.2
1094.61	2046.96
1095.3	2090.83
1096	2068.12
1096.69	2095.98
1097.38	2142.77
1098.07	2143.98
1098.76	2200.38
1099.45	2189.34
1100.15	2253.91
1100.84	2262.05
1101.53	2301.87
1102.22	2319.65
1102.91	2204.08
1103.6	2317.94
1104.3	2375.35
1104.99	2433.34
1105.68	2481.54
1106.37	2460.58
1107.06	2510.29
1107.75	2515.92
1108.45	2559.54
1109.14	2567.08
1109.83	2576.6
1110.52	2616.09
1111.21	2685.53
1111.9	2751.53
1112.6	2710.08
1113.29	2726.38
1113.98	2786.87
1114.67	2763.89
1115.36	2835.22
1116.05	2864.52
1116.75	2948.31
1117.44	3009.91
1118.13	2992.8
1118.82	2894.86
1119.51	2996.39
1120.2	3160.34
1120.9	3116.74
1121.59	3149.08
1122.28	3230.78
1122.97	3270.88
1123.66	3291.74
1124.35	3339.1
1125.05	3410.06
1125.74	3375.64
1126.43	3429.75
1127.12	3437.48
1127.81	3548.7
1128.5	3455.56
1129.2	3583.85
1129.89	3538.49
1130.58	3613.22
1131.27	3686.85
1131.96	3674.58
1132.65	3707.42
1133.35	3903.21
1134.04	3831.56
1134.73	3894.36
1135.42	3914.9
1136.11	3871.66
1136.8	3919.47
1137.5	3972.65
1138.19	4105.04
1138.88	4021.5
1139.57	4118.1
1140.26	4282.66
1140.95	4183.17
1141.65	4267.03
1142.34	4246.72
1143.03	4393.61
1143.72	4337.58
1144.41	4442.88
1145.1	4498.78
1145.8	4450.57
1146.49	4474.67
1147.18	4500.02
1147.87	4663.1
1148.56	4633.09
1149.25	4696.81
1149.95	4788.17
1150.64	4752.62
1151.33	4853.15
1152.02	4915.87
1152.71	5029.96
1153.4	5053.52
1154.1	5087.93
1154.79	5143.37
1155.48	5219.65
1156.17	5205.19
1156.86	5345.87
1157.55	5368.45
1158.25	5389.06
1158.94	5397.73
1159.63	5588.43
1160.32	5686.18
1161.01	5702.05
1161.7	5761.72
1162.4	5780.22
1163.09	5865.96
1163.78	6049.43
1164.47	6101.33
1165.16	6211.26
1165.85	6292.68
1166.55	6319.96
1167.24	6418.47
1167.93	6529.32
1168.62	6583.98
1169.31	6691.85
1170	6845.57
1170.7	6962.43
1171.39	7071.07
1172.08	7140.73
1172.77	7362.61
1173.46	7446.07
1174.15	7551.7
1174.85	7628.69
1175.54	7742.87
1176.23	7944.4
1176.92	8004.7
1177.61	8215.7
1178.3	8370.01
1179	8619.99
1179.69	8683.48
1180.38	8943.62
1181.07	9057.8
1181.76	9224.47
1182.45	9333.38
1183.15	9524.76
1183.84	9759.99
1184.53	10018.8
1185.22	10201.3
1185.91	10266.2
1186.6	10521.2
1187.3	10810.9
1187.99	11009.7
1188.68	11043.5
1189.37	11345.2
1190.06	11897.3
1190.75	11912.8
1191.45	12147.9
1192.14	12615.3
1192.83	12806.5
1193.52	12884.3
1194.21	13401.7
1194.9	13269.6
1195.6	13498.8
1196.29	13947.3
1196.98	14153
1197.67	14491.9
1198.36	14589.7
1199.05	14805.8
1199.75	15154.3
1200.44	15449.9
1201.13	15696.8
1201.82	15846.4
1202.51	16134.5
1203.2	16272.8
1203.9	16276.5
1204.59	16481.8
1205.28	16774.6
1205.97	16763.1
1206.66	16916.6
1207.35	17062.5
1208.05	17057.7
1208.74	17207.6
1209.43	17278.7
1210.12	17237.5
1210.81	17195.6
1211.5	17221.9
1212.2	17246.4
1212.89	17080.9
1213.58	17207.6
1214.27	17165.3
1214.96	16915.3
1215.65	17114.7
1216.35	17041.7
1217.04	16856.9
1217.73	16842
1218.42	16619.9
1219.11	16518.3
1219.8	16463.9
1220.5	16315.1
1221.19	16126.9
1221.88	15959.8
1222.57	16025.5
1223.26	15974.5
1223.95	15785.6
1224.64	15685.7
1225.34	15610.8
1226.03	15492.6
1226.72	15723.8
1227.41	15333
1228.1	15322.3
1228.8	15244
1229.49	15347.7
1230.18	15237.7
1230.87	15187.9
1231.56	15190.5
1232.25	14946.9
1232.95	14843
1233.64	14951.1
1234.33	14845.6
1235.02	14746.1
1235.71	14760
1236.4	14776.6
1237.1	14688.4
1237.79	14616.7
1238.48	14570.3
1239.17	14580.6
1239.86	14371.9
1240.55	14387.1
1241.24	14132.1
1241.94	14185.1
1242.63	14181.5
1243.32	14127.6
1244.01	14202.6
1244.7	14165.7
1245.39	14179.8
1246.09	13823.4
1246.78	14178.8
1247.47	14051.3
1248.16	13786.4
1248.85	14024.1
1249.54	13875.7
1250.24	13746.1
1250.93	13856.4
1251.62	13776.2
1252.31	13582.3
1253	13708.2
1253.69	13780.6
1254.39	13697.5
1255.08	13649.9
1255.77	13810.8
1256.46	13819.6
1257.15	13753.8
1257.85	13903.9
1258.54	14009.3
1259.23	13947.5
1259.92	14073.7
1260.61	14152.1
1261.3	14129
1261.99	14236.5
1262.69	14237.4
1263.38	14290
1264.07	14440.6
1264.76	14618.7
1265.45	14451.1
1266.14	14759.1
1266.84	14940.9
1267.53	15023.7
1268.22	14932.4
1268.91	15531.6
1269.6	15432.2
1270.29	15422
1270.99	15509.2
1271.68	15936.4
1272.37	16054.5
1273.06	16274.8
1273.75	16481.2
1274.44	16417.3
1275.14	16658.7
1275.83	16884.5
1276.52	17011.5
1277.21	17145.7
1277.9	17310.1
1278.59	17332.1
1279.29	17373.3
1279.98	17725.9
1280.67	18052.8
1281.36	18128
1282.05	18300.1
1282.74	18344
1283.44	18292.8
1284.13	18519.4
1284.82	18825.4
1285.51	18714.8
1286.2	18773.4
1286.89	19011.4
1287.59	19352.1
1288.28	19049
1288.97	19343.8
1289.66	19482.4
1290.35	19317.2
1291.04	19320.8
1291.74	19424.5
1292.43	19387.8
1293.12	19349.7
1293.81	19454.9
1294.5	19596.3
1295.19	19498.8
1295.89	19582.7
1296.58	19517.4
1297.27	19269.2
1297.96	19317
1298.65	19318.4
1299.34	19043.3
1300.04	19082.6
1300.73	19069.9
1301.42	18839.4
1302.11	18898.8
1302.8	18818.9
1303.49	18519.5
1304.19	18396.4
1304.88	18463.1
1305.57	18475.6
1306.26	18308.4
1306.95	18215.4
1307.64	17874.4
1308.34	17716.5
1309.03	17926.4
1309.72	17782.2
1310.41	17552.1
1311.1	17328.6
1311.79	17279.1
1312.49	17077
1313.18	17084.5
1313.87	16984.2
1314.56	16804
1315.25	16643.1
1315.94	16559.9
1316.64	16434.4
1317.33	16397.4
1318.02	16393.4
1318.71	16318.6
1319.4	16110.1
1320.09	16157.7
1320.79	16032.7
1321.48	15994
1322.17	15720.3
1322.86	15884.4
1323.55	15707.6
1324.24	15669.1
1324.94	15629.1
1325.63	15558.7
1326.32	15646.7
1327.01	15539.5
1327.7	15501.2
1328.39	15424
1329.09	15402.8
1329.78	15363.8
1330.47	15238.3
1331.16	15081.2
1331.85	15238.4
1332.54	15075
1333.24	15070.5
1333.93	14906.4
1334.62	14666.7
1335.31	14825
1336	14836.8
1336.69	14707.5
1337.39	14409.4
1338.08	14517.1
1338.77	14359.7
1339.46	14505.9
1340.15	14352.7
1340.84	14080.9
1341.54	13976.3
1342.23	13807.1
1342.92	13759.7
1343.61	13617.6
1344.3	13509.7
1344.99	13347.1
1345.69	13200.8
1346.38	13088
1347.07	12846.5
1347.76	12749.4
1348.45	12525.4
1349.14	12217.4
1349.84	12440.9
1350.53	12232.4
1351.22	12094
1351.91	11919.8
1352.6	11787.7
1353.29	11648.4
1353.99	11374.4
1354.68	11507.7
1355.37	11348.5
1356.06	11108.1
1356.75	10946.1
1357.44	10813.8
1358.14	10668.7
1358.83	10671.5
1359.52	10464.8
1360.21	10450.9
1360.9	10441.4
1361.59	10423.9
1362.29	10162.8
1362.98	9952.69
1363.67	9989.75
1364.36	9665.17
1365.05	9808.93
1365.74	9719.52
1366.44	9755.1
1367.13	9635.32
1367.82	9659.12
1368.51	9550.97
1369.2	9423.88
1369.89	9359.95
1370.59	9337.74
1371.28	9312.56
1371.97	9231.4
1372.66	9168.46
1373.35	9119.68
1374.04	9187.59
1374.74	9105.83
1375.43	8966.05
1376.12	9061.28
1376.81	8913
1377.5	9059.83
1378.19	9059.88
1378.89	9042.64
1379.58	9038.61
1380.27	8903.01
1380.96	8958.37
1381.65	8981.52
1382.34	8974.04
1383.04	8894.94
1383.73	8979.25
1384.42	9088.53
1385.11	8917.82
1385.8	9142.13
1386.49	9226.02
1387.19	9020.66
1387.88	9229.8
1388.57	9356.38
1389.26	9189.76
1389.95	9146.1
1390.64	9285.18
1391.34	9316.58
1392.03	9311.14
1392.72	9325.49
1393.41	9514.36
1394.1	9516.36
1394.79	9657.87
1395.49	9677.76
1396.18	9490.39
1396.87	9568.51
1397.56	9747.27
1398.25	9784
1398.94	9875.91
1399.64	9868.55
1400.33	9917.39
1401.02	10006.1
1401.71	10037.4
1402.4	10155
1403.09	10232.6
1403.79	10313.4
1404.48	10426.4
1405.17	10404.7
1405.86	10482.9
1406.55	10662.8
1407.24	10640
1407.94	10632
1408.63	10794.5
1409.32	10919.8
1410.01	10828.9
1410.7	11042.1
1411.39	11095.8
1412.09	10947.8
1412.78	11043.9
1413.47	11146
1414.16	11133.8
1414.85	11208.4
1415.54	11214.8
1416.24	11322.8
1416.93	11347.6
1417.62	11313.1
1418.31	11397.8
1419	11330.9
1419.69	11349.4
1420.39	11386.5
1421.08	11419.7
1421.77	11430.9
1422.46	11406.9
1423.15	11611.8
1423.84	11339.6
1424.54	11420.6
1425.23	11340.2
1425.92	11311.9
1426.61	11370
1427.3	11344
1427.99	11327.9
1428.69	11282.7
1429.38	11262.9
1430.07	11352
1430.76	11263.5
1431.45	11169.9
1432.14	11232.8
1432.84	11170.9
1433.53	11063
1434.22	11152
1434.91	11110.3
1435.6	10987.4
1436.29	10989.1
1436.99	11003.4
1437.68	10953.8
1438.37	10825.7
1439.06	10902.3
1439.75	10784.8
1440.44	10731.8
1441.14	10730.7
1441.83	10686.2
1442.52	10586.5
1443.21	10524.3
1443.9	10322.4
1444.59	10212.9
1445.29	10225.4
1445.98	10042.5
1446.67	9959.75
1447.36	9890.33
1448.05	9817.18
1448.74	9745.38
1449.44	9727.25
1450.13	9699.73
1450.82	9710.82
1451.51	9641.33
1452.2	9612.87
1452.89	9601.35
1453.59	9579.59
1454.28	9496.55
1454.97	9541.02
1455.66	9614.25
1456.35	9527.54
1457.04	9494.57
1457.74	9457.08
1458.43	9504.68
1459.12	9525.37
1459.81	9490.04
1460.5	9444.87
1461.19	9526.74
1461.89	9453.36
1462.58	9356.56
1463.27	9495.03
1463.96	9409.28
1464.65	9504.89
1465.34	9660.58
1466.04	9417.26
1466.73	9608.63
1467.42	9360.14
1468.11	9528.74
1468.8	9583.16
1469.49	9482.33
1470.19	9401.78
1470.88	9347.29
1471.57	9452.92
1472.26	9401.17
1472.95	9450.35
1473.64	9632.27
1474.34	9670.22
1475.03	9616.11
1475.72	9607.09
1476.41	9630.09
1477.1	9626.83
1477.79	9664.08
1478.49	9623.68
1479.18	9496.65
1479.87	9518.71
1480.56	9620.91
1481.25	9633.31
1481.94	9512.5
1482.64	9538.99
[truncated: 748 more rows]

## Sheet: PyriteStandard
Column1	Column2
156.696	0
157.178	8.27222
157.66	22.6723
158.142	33.4641
158.625	35.0256
159.107	23.2573
159.589	10.6638
160.071	2.69586
160.553	0.997314
161.035	0.533752
161.517	8.98572
161.999	18.5314
162.481	23.2327
162.964	25.3745
163.446	29.3673
163.928	37.971
164.41	49.0204
164.892	59.3862
165.374	70.2761
165.856	79.4873
166.338	84.1913
166.821	83.4828
167.303	80.5842
167.785	78.3075
168.267	76.2808
168.749	74.6229
169.231	74.0666
169.713	71.9139
170.195	66.4254
170.677	59.238
171.16	52.313
171.642	46.0537
172.124	40.8064
172.606	38.0842
173.088	40.6551
173.57	40.4942
174.052	31.0236
174.534	17.065
175.017	5.6236
175.499	0.204315
175.981	1.51654
176.463	1.28378
176.945	1.56189
177.427	4.45664
177.909	5.85773
178.391	6.58865
178.873	7.75201
179.356	10.0722
179.838	12.9608
180.32	14.2986
180.802	12.1821
181.284	12.027
181.766	15.3832
182.248	21.3282
182.73	28.9465
183.212	38.0235
183.695	48.1283
184.177	58.2416
184.659	69.2654
185.141	79.3295
185.623	90.3789
186.105	98.887
186.587	100.567
187.069	93.6725
187.552	79.0825
188.034	68.0729
188.516	63.0979
188.998	58.0773
189.48	53.6126
189.962	51.3873
190.444	49.0935
190.926	43.3221
191.408	37.1104
191.891	32.3963
192.373	28.9866
192.855	28.6277
193.337	31.7284
193.819	36.1584
194.301	40.3143
194.783	43.5934
195.265	46.612
195.748	51.1209
196.23	59.2701
196.712	64.2875
197.194	63.1405
197.676	60.2809
198.158	60.0518
198.64	63.9432
199.122	69.621
199.604	72.2283
200.087	68.5054
200.569	68.6227
201.051	75.8334
201.533	84.9539
202.015	92.138
202.497	96.0159
202.979	97.6906
203.461	100.074
203.944	104.483
204.426	106.075
204.908	102.147
205.39	97.5154
205.872	96.0552
206.354	98.2909
206.836	101.334
207.318	100.835
207.8	94.6675
208.282	90.5729
208.765	91.6361
209.247	92.1773
209.729	88.0368
210.211	79.2187
210.693	69.5115
211.175	64.2441
211.657	66.2845
212.139	61.9887
212.622	43.8536
213.104	26.2937
213.586	16.8726
214.068	15.307
214.55	17.5737
215.032	17.6892
215.514	15.535
215.996	11.9701
216.478	3.18866
216.961	3.50745
217.443	3.78217
217.925	0.73999
218.407	4.96301
218.889	4.5296
219.371	0.761505
219.853	3.7009
220.335	1.35437
220.818	0.534119
221.3	0.703278
221.782	0.788452
222.264	3.95718
222.746	9.38113
223.228	16.4939
223.71	18.515
224.192	9.90483
224.674	1.871
225.157	3.90097
225.639	7.53357
226.121	9.36426
226.603	9.49745
227.085	8.17783
227.567	6.30414
228.049	2.54875
228.531	0.074509
229.013	0.555054
229.496	0.27063
229.978	2.49127
230.46	6.12791
230.942	10.2721
231.424	12.5734
231.906	11.7808
232.388	11.0655
232.87	10.7853
233.353	10.6572
233.835	10.23
234.317	9.49109
234.799	9.42549
235.281	11.8843
235.763	18.8746
236.245	23.4155
236.727	22.1739
237.209	20.5391
237.692	22.6076
238.174	28.9084
238.656	36.3514
239.138	41.2754
239.62	43.2637
240.102	44.415
240.584	44.2332
241.066	43.6844
241.549	43.5918
242.031	43.689
242.513	42.7497
242.995	38.438
243.477	30.0829
243.959	26.6732
244.441	34.8455
244.923	41.8244
245.405	43.0501
245.888	39.1722
246.37	32.3848
246.852	22.0422
247.334	9.35844
247.816	7.17546
248.298	26.5005
248.78	41.7837
249.262	41.8182
249.745	32.7599
250.227	24.5692
250.709	22.4309
251.191	24.7289
251.673	26.8901
252.155	28.888
252.637	30.798
253.119	33.4011
253.601	35.6579
254.084	36.2951
254.566	34.6995
255.048	31.8176
255.53	28.8304
256.012	25.4495
256.494	23.195
256.976	23.8467
257.458	25.0162
257.941	24.7478
258.423	22.5912
258.905	20.2217
259.387	19.5419
259.869	20.634
260.351	21.4699
260.833	21.7241
261.315	21.522
261.798	20.469
262.28	18.7036
262.762	17.8034
263.244	19.9227
263.726	24.2988
264.208	26.3066
264.69	24.5704
265.172	21.7089
265.654	18.3288
266.137	15.1236
266.619	14.7296
267.101	20.4515
267.583	29.4517
268.065	35.6897
268.547	38.565
269.029	40.1677
269.511	42.0127
269.993	43.5376
270.476	43.3705
270.958	39.5172
271.44	35.2092
271.922	34.8747
272.404	38.6774
272.886	41.4797
273.368	39.3495
273.85	35.2728
274.332	34.9382
274.815	39.8575
275.297	46.0037
275.779	52.3872
276.261	58.171
276.743	59.769
277.225	54.227
277.707	45.8082
278.19	42.2155
278.672	44.2216
279.154	45.9374
279.636	45.2709
280.118	42.7414
280.6	38.9329
281.082	33.7237
281.564	28.5001
282.046	25.3129
282.529	24.2578
283.011	23.4366
283.493	22.9668
283.975	22.1028
284.457	19.4588
284.939	15.1544
285.421	11.8017
285.903	11.9988
286.385	15.594
286.868	16.3137
287.35	11.4271
287.832	6.79796
288.314	5.76376
288.796	7.3009
289.278	8.4167
289.76	7.38806
290.242	4.76591
290.724	2.87871
291.207	1.95312
291.689	1.41905
292.171	1.39684
292.653	1.65189
293.135	1.81021
293.617	1.78096
294.099	1.9057
294.581	2.88261
295.063	5.51379
295.546	7.50258
296.028	9.33009
296.51	10.2611
296.992	9.1722
297.474	6.2858
297.956	3.20865
298.438	1.43726
298.921	0.913101
299.403	2.21223
299.885	7.67636
300.367	12.5665
300.849	14.7741
301.331	15.1066
301.813	15.8328
302.295	18.8272
302.777	23.0852
303.26	23.0532
303.742	13.8143
304.224	7.49541
304.706	8.0705
305.188	11.854
305.67	15.1283
306.152	16.5253
306.634	16.7595
307.116	16.2754
307.599	14.1872
308.081	14.541
308.563	21.2762
309.045	28.5237
309.527	33.1555
310.009	34.7714
310.491	34.1625
310.973	30.9308
311.455	25.4284
311.938	21.7382
312.42	20.9161
312.902	20.8862
313.384	20.0524
313.866	18.862
314.348	18.5541
314.83	20.4627
315.312	23.2713
315.795	24.4437
316.277	23.6843
316.759	22.9794
317.241	23.7406
317.723	25.1292
318.205	25.7721
318.687	25.4659
319.169	24.4567
319.651	22.6045
320.134	20.0977
320.616	17.6736
321.098	15.4343
321.58	13.686
322.062	13.1158
322.544	13.898
323.026	14.361
323.508	12.6103
323.99	10.879
324.473	12.4411
324.955	17.8653
325.437	24.4289
325.919	28.4386
326.401	29.4264
326.883	39.0542
327.365	62.8474
327.847	89.8628
328.33	115.35
328.812	139.081
329.294	162.053
329.776	185.315
330.258	207.816
330.74	223.935
331.222	225.145
331.704	230.565
332.187	246.091
332.669	265.091
333.151	279.69
333.633	287.651
334.115	293.575
334.597	304.895
335.079	324.537
335.561	341.888
336.043	350.389
336.526	362.551
337.008	383.988
337.49	414.802
337.972	452.848
338.454	496.232
338.936	545.199
339.418	601.624
339.9	662.506
340.382	736.151
340.865	830.489
341.347	935.633
341.829	1047.72
342.311	1172.17
342.793	1274.37
343.275	1300.97
343.757	1246.73
344.239	1151.79
344.721	1001.37
345.204	829.875
345.686	652.753
346.168	472.151
346.65	318.362
347.132	214.461
347.614	151.924
348.096	109.963
348.579	90.1949
349.061	79.9283
349.543	72.7163
350.025	67.5021
350.507	61.1836
350.989	51.4685
351.471	41.9959
351.953	36.0688
352.435	32.9636
352.918	29.144
353.4	22.325
353.882	14.7801
354.364	12.8522
354.846	19.6894
355.328	24.2406
355.81	21.7618
356.292	16.7511
356.774	14.8496
357.257	17.1487
357.739	20.5982
358.221	21.8987
358.703	20.7978
359.185	18.5909
359.667	13.0723
360.149	8.81392
360.631	9.69138
361.113	13.4723
361.596	14.212
362.078	8.15099
362.56	1.45877
363.042	2.67242
363.524	11.7965
364.006	23.1569
364.488	26.2266
364.97	27.4379
365.452	33.0951
365.935	44.1489
366.417	55.4627
366.899	60.8121
367.381	59.8643
367.863	58.9505
368.345	56.9936
368.827	56.8031
369.31	61.3182
369.792	68.561
370.274	73.5448
370.756	71.823
371.238	68.2505
371.72	71.9829
372.202	83.8072
372.684	95.0901
373.166	100.461
373.649	104.374
374.131	113.723
374.613	129.921
375.095	147.156
375.577	161.277
376.059	174.4
376.541	190.838
377.023	211.592
377.505	235.199
377.988	263.587
378.47	297.604
378.952	313.626
379.434	304.365
379.916	283.254
380.398	255.12
380.88	221.465
381.362	183.397
381.844	140.625
382.327	96.9752
382.809	63.4361
383.291	45.6393
383.773	32.0533
384.255	23.377
384.737	18.1792
385.219	16.292
385.701	16.9879
386.184	18.1783
386.666	17.7731
387.148	15.7139
387.63	13.2733
388.112	9.98811
388.594	6.8324
389.076	3.94472
389.558	1.43314
390.041	0.684837
390.523	2.60773
391.005	3.59847
391.487	1.92596
391.969	2.78648
392.451	6.7134
392.933	9.05093
393.415	9.83862
393.897	8.67527
394.38	5.60968
394.862	3.17522
395.344	3.2225
395.826	4.48168
396.308	4.97614
396.79	4.53842
397.272	3.17957
397.754	0.06076
398.236	3.95967
398.719	4.84752
399.201	0.850716
399.683	5.75508
400.165	6.40903
400.647	4.52763
401.129	3.07627
401.611	3.02494
402.093	3.07684
402.575	1.04147
403.058	4.70467
403.54	7.40973
404.022	5.40737
404.504	2.39332
404.986	0.417778
405.468	2.65096
405.95	3.95265
406.433	4.05894
406.915	3.17343
407.397	1.97365
407.879	0.35717
408.361	1.3749
408.843	4.34403
409.325	6.64707
409.807	6.25153
410.289	3.01759
410.772	0.551056
411.254	2.38337
411.736	2.72156
412.218	2.58299
412.7	1.7296
413.182	1.12601
413.664	1.12145
414.146	1.87055
414.628	4.03173
415.111	9.4117
415.593	14.1873
416.075	15.6614
416.557	14.2714
417.039	10.6487
417.521	4.43242
418.003	1.78748
418.485	3.98114
418.967	0.886703
419.45	2.30783
419.932	6.94289
420.414	10.3216
420.896	9.40934
421.378	5.5841
421.86	2.98997
422.342	4.49554
422.824	9.05479
423.307	12.1315
423.789	12.8816
424.271	13.4182
424.753	13.8353
425.235	14.1882
425.717	14.8275
426.199	15.6923
426.681	16.0736
427.163	14.6998
427.646	11.8513
428.128	11.0598
428.61	13.6729
429.092	15.8028
429.574	14.8907
430.056	12.3808
430.538	10.2552
431.02	8.82085
431.502	8.20036
431.985	8.93592
432.467	10.6453
432.949	11.9041
433.431	12.2683
433.913	12.3935
434.395	13.345
434.877	15.3199
435.36	15.5954
435.842	12.1451
436.324	8.64442
436.806	7.23024
437.288	7.62247
437.77	8.87602
438.252	10.5607
438.734	12.4688
439.216	14.2081
439.699	17.0702
440.181	17.2855
440.663	12.9294
441.145	7.78711
441.627	3.6196
442.109	0.86573
442.591	0.238525
443.073	0.902702
443.555	3.68902
444.038	5.83389
444.52	7.24876
445.002	8.26776
445.484	8.42464
445.966	8.5628
446.448	9.87562
446.93	12.7337
447.412	14.8396
447.894	14.591
448.377	12.5506
448.859	9.23235
449.341	4.61201
449.823	1.92002
450.305	4.36255
450.787	11.2799
451.269	15.59
451.751	14.6597
452.234	14.39
452.716	17.8313
453.198	22.6887
453.68	25.7411
454.162	26.0571
454.644	24.831
455.126	23.6554
455.608	22.7827
456.091	20.2566
456.573	11.825
457.055	6.79315
457.537	10.4225
458.019	18.3839
458.501	23.4711
458.983	22.4164
459.465	19.0255
459.947	19.1416
460.43	22.7296
460.912	23.942
461.394	20.5322
461.876	16.628
462.358	15.8554
462.84	17.7582
463.322	19.7306
463.804	22.0243
464.286	23.7942
464.769	23.5481
465.251	21.4942
465.733	19.6483
466.215	18.8982
466.697	18.8559
467.179	19.2251
467.661	20.5082
468.143	20.8085
468.625	19.0963
469.108	17.5737
469.59	17.5552
470.072	19.0077
470.554	21.822
471.036	26.3906
471.518	30.9949
472	30.9973
472.483	24.2127
472.965	18.8744
473.447	18.5096
473.929	18.8907
474.411	17.1302
474.893	13.1393
475.375	9.22889
475.857	6.02294
476.339	3.84415
476.822	4.04495
477.304	6.58616
477.786	8.72205
478.268	8.79698
478.75	7.86436
479.232	8.88897
479.714	13.6903
480.196	15.7115
480.678	11.201
481.161	5.05396
481.643	1.20394
482.125	0.158463
482.607	1.44886
483.089	5.19453
483.571	10.4601
484.053	11.7583
484.535	4.74105
485.017	0.953209
485.5	4.27595
485.982	9.47649
486.464	12.6821
486.946	13.3873
487.428	13.0009
487.91	12.1317
488.392	11.0486
488.874	10.6353
489.356	10.88
489.839	11.3569
490.321	12.2066
490.803	12.9203
491.285	12.3758
491.767	9.94302
492.249	8.0871
492.731	7.56066
493.214	8.09903
493.696	10.0278
494.178	13.0308
494.66	15.3515
495.142	15.5399
495.624	13.9742
496.106	13.1072
496.588	13.0798
497.07	13.6333
497.553	14.9554
498.035	16.6711
498.517	19.4262
498.999	22.7059
499.481	23.8317
499.963	18.9111
500.445	10.094
500.927	5.99328
501.409	7.40448
501.892	10.2949
502.374	14.6811
502.856	18.4721
503.338	17.918
503.82	11.5906
504.302	6.71997
504.784	7.68003
505.266	10.57
505.748	10.1953
506.231	6.69773
506.713	4.66369
507.195	7.54555
507.677	13.742
508.159	16.1868
508.641	10.2875
509.123	7.30436
509.605	9.92802
510.088	13.9165
510.57	16.7816
511.052	18.0594
511.534	17.8674
512.016	15.7786
512.498	12.6096
512.98	10.7059
513.462	10.3068
513.944	9.82938
514.427	8.91564
514.909	7.47221
515.391	5.11142
515.873	1.68219
516.355	0.815163
516.837	1.8028
517.319	1.59051
517.802	0.549339
518.284	3.84998
518.766	5.37275
519.248	3.37296
519.73	0.521461
520.212	2.3354
520.694	0.313927
521.176	0.43161
521.658	2.2235
522.14	4.03362
522.623	1.11446
523.105	4.54021
523.587	7.30028
524.069	3.25469
524.551	2.98311
525.033	3.14128
525.515	2.73272
525.997	7.13133
526.48	8.28897
526.962	7.41463
527.444	4.55831
527.926	0.093781
528.408	1.95779
528.89	1.29501
529.372	4.80048
529.854	5.59706
530.337	4.4836
530.819	2.62723
531.301	0.497856
531.783	0.637817
532.265	1.49161
532.747	7.94511
533.229	11.0624
533.711	7.13816
534.193	4.04324
534.676	5.07914
535.158	8.02193
535.64	9.75
536.122	9.32343
536.604	8.16042
537.086	6.8723
537.568	5.88314
538.05	7.28998
538.533	11.7592
539.015	15.2413
539.497	14.3293
539.979	10.0392
540.461	7.66132
540.943	7.72498
541.425	8.64232
541.907	11.3107
542.389	13.8922
542.871	14.2545
543.354	12.5471
543.836	10.7626
544.318	10.684
544.8	11.6216
545.282	9.87778
545.764	3.26994
546.246	0.008636
546.729	5.61886
547.211	12.8369
547.693	15.9776
548.175	15.1034
548.657	14.0279
549.139	14.0538
549.621	14.9428
550.103	17.538
550.585	21.0587
551.067	21.5208
551.55	16.8444
552.032	11.0249
552.514	10.9576
552.996	19.6659
553.478	23.8452
553.96	21.5919
554.442	17.5722
554.924	10.7163
555.407	4.25906
555.889	3.75402
556.371	11.3846
556.853	21.0513
557.335	26.0184
557.817	26.5519
558.299	23.9554
558.781	16.9211
559.263	11.3318
559.745	12.0861
560.228	17.2024
560.71	20.0028
561.192	19.7013
561.674	18.4393
562.156	16.13
562.638	13.6581
563.12	12.4701
563.602	12.4847
564.085	11.73
564.567	8.31429
565.049	3.65314
565.531	3.74096
566.013	11.1569
566.495	16.8472
566.977	18.8931
567.459	19.0702
567.942	17.5324
568.424	14.8254
568.906	13.005
569.388	13.6343
569.87	14.8924
570.352	14.9271
570.834	14.0325
571.316	13.2802
571.798	13.0413
572.281	12.5817
572.763	10.8377
573.245	7.50152
573.727	5.59962
574.209	5.64459
574.691	6.27547
575.173	7.66
575.655	9.40392
576.138	11.0076
576.62	12.3217
577.102	13.2185
577.584	13.0028
578.066	12.1893
578.548	13.401
579.03	16.9166
579.512	19.0756
579.994	17.9504
580.477	15.2312
580.959	13.3184
581.441	11.816
581.923	11.3773
582.405	12.4346
582.887	14.0963
583.369	17.4521
583.851	20.6457
584.333	19.4172
584.816	11.7585
585.298	2.94968
585.78	2.34787
586.262	10.8104
586.744	16.6534
587.226	18.9235
587.708	18.9409
588.19	16.0945
588.673	11.6731
589.155	7.86671
589.637	4.9119
590.119	3.00276
590.601	2.0973
591.083	2.17676
591.565	3.83725
592.047	6.72105
592.529	9.05048
593.012	9.61466
593.494	8.80991
593.976	7.79312
594.458	6.35626
594.94	5.21347
595.422	4.14042
595.904	3.68325
596.386	3.99982
596.869	5.22508
597.351	8.15411
597.833	14.5994
598.315	19.7754
598.797	17.4674
599.279	10.5154
599.761	6.43533
600.243	6.66722
600.726	7.97469
601.208	7.4743
601.69	5.62674
602.172	6.21523
602.654	13.4709
603.136	16.7443
603.618	10.7173
604.1	3.99345
604.582	3.94297
605.064	9.64601
605.547	14.9422
606.029	16.4216
606.511	15.4405
606.993	13.1353
607.475	9.82946
607.957	8.23584
608.439	9.18675
608.921	11.5085
609.404	14.8682
609.886	19.2574
610.368	19.0927
610.85	8.8923
611.332	1.52971
611.814	2.09231
612.296	5.57368
612.778	7.1154
613.26	6.11274
613.743	4.55904
614.225	3.35205
614.707	3.16791
615.189	6.59632
615.671	13.8707
616.153	19.6763
616.635	22.8941
617.117	23.3209
617.6	19.8266
618.082	12.3029
618.564	5.99255
619.046	0.168671
619.528	3.33945
620.01	2.94362
620.492	0.260948
620.974	3.7659
621.457	8.3228
621.939	10.8669
622.421	8.10782
622.903	1.92719
623.385	0.254837
623.867	3.93546
624.349	7.19916
624.831	8.02253
625.313	8.03549
625.795	9.87233
626.278	13.5364
626.76	14.4747
627.242	8.77785
627.724	3.37749
628.206	2.1415
628.688	3.16669
629.17	3.47119
629.653	2.43076
630.135	1.65072
630.617	3.05707
631.099	6.01862
631.581	6.57627
632.063	3.85568
632.545	2.5468
633.027	5.42773
633.509	9.02952
633.991	8.91144
634.474	5.39436
634.956	3.2271
635.438	4.37043
635.92	5.80833
636.402	6.05946
636.884	5.43976
637.366	3.88558
637.848	1.64571
638.331	0.331131
638.813	1.86319
639.295	5.66593
639.777	8.24744
640.259	9.54986
640.741	9.82777
641.223	8.72592
641.705	7.00578
642.188	5.04054
642.67	2.92483
643.152	2.06515
643.634	4.75444
644.116	6.63242
644.598	4.01611
645.08	0.458763
645.562	2.74132
646.044	2.01318
646.527	0.060371
647.009	1.61453
647.491	3.03219
647.973	4.43625
648.455	6.07635
648.937	6.529
649.419	4.40014
649.901	2.07874
650.384	2.1134
650.866	4.16198
651.348	5.86063
651.83	7.69545
652.312	8.10714
652.794	5.08909
653.276	0.83593
653.758	2.28748
654.24	3.58449
654.722	2.40477
655.205	2.50542
655.687	9.30991
656.169	11.2086
656.651	7.19129
657.133	4.67811
657.615	6.33263
658.097	8.28999
658.58	6.01267
659.062	0.749985
659.544	1.74816
660.026	1.53301
660.508	4.52692
660.99	5.06764
661.472	4.37663
661.954	3.28397
662.436	2.21947
662.918	1.98083
663.401	3.27637
663.883	5.21188
664.365	5.65706
664.847	4.54864
665.329	3.95739
665.811	4.07355
666.293	5.0878
666.775	7.58395
667.258	11.1214
667.74	13.8483
668.222	16.7281
668.704	17.2571
669.186	12.4049
669.668	7.11429
670.15	5.54193
670.632	6.9451
671.115	8.2951
671.597	8.14108
672.079	7.21664
672.561	6.74426
673.043	6.66003
673.525	6.57588
674.007	6.505
674.489	6.0095
674.971	4.35467
675.454	2.46683
675.936	2.92588
676.418	7.46073
676.9	10.5171
677.382	11.0234
677.864	10.8785
678.346	11.1176
678.828	11.3354
679.311	10.6039
679.793	8.6558
680.275	6.8297
680.757	6.35313
681.239	6.90756
681.721	8.85067
682.203	11.9179
682.685	11.668
683.167	5.2995
683.649	2.39398
684.132	3.77887
684.614	2.43087
685.096	8.17995
685.578	15.5654
686.06	19.9978
686.542	18.6833
687.024	14.8833
687.506	11.9381
687.989	10.231
688.471	8.15163
688.953	3.28365
689.435	1.29889
689.917	0.906982
690.399	2.69817
690.881	4.06416
691.363	1.73993
691.846	1.559
692.328	3.23067
692.81	3.36741
693.292	2.61556
693.774	0.422096
694.256	1.42004
694.738	1.4641
695.22	2.09598
695.702	6.65702
696.185	13.4157
696.667	15.9046
697.149	9.07675
697.631	2.6886
698.113	3.02639
698.595	6.12704
699.077	7.04794
699.559	5.563
700.042	3.97123
700.524	3.62914
701.006	4.31553
701.488	6.24921
701.97	9.61207
702.452	9.96211
702.934	5.46238
703.416	1.26115
703.898	0.954956
704.381	3.17465
704.863	4.40068
705.345	4.36053
705.827	3.97594
706.309	2.64735
706.791	1.73235
707.273	1.86273
707.755	3.02694
708.237	5.59954
708.72	9.5724
709.202	12.9996
709.684	14.0701
710.166	13.1948
710.648	10.4464
711.13	6.04088
711.612	3.9986
712.094	6.2492
712.577	10.2256
713.059	12.7943
713.541	13.682
714.023	14.3289
714.505	15.7597
714.987	15.4754
715.469	10.8208
715.951	6.11216
716.433	5.91612
716.916	9.2261
717.398	10.1959
717.88	4.8313
718.362	0.630356
718.844	0.383713
719.326	2.94217
719.808	4.69489
720.29	4.4828
720.773	5.10249
721.255	8.65196
721.737	13.2819
722.219	14.154
722.701	10.5958
723.183	7.9646
723.665	7.04336
724.147	6.23843
724.63	3.49886
725.112	0.784065
725.594	2.67019
726.076	11.4242
726.558	16.8173
727.04	15.7254
727.522	12.0728
728.004	5.69612
728.486	0.717003
728.968	2.70071
729.451	0.637093
729.933	5.15462
730.415	7.4658
730.897	8.14512
731.379	8.19559
731.861	7.69681
732.343	7.37889
732.825	7.44022
733.308	7.88844
733.79	8.9353
734.272	10.4408
734.754	10.4583
735.236	6.7738
735.718	5.34213
736.2	9.94641
736.682	14.029
737.164	12.3633
737.647	6.94202
738.129	3.74509
738.611	5.352
739.093	6.94061
739.575	5.14654
740.057	2.31879
740.539	0.852455
741.021	0.922745
741.504	2.50841
741.986	5.73932
742.468	8.67296
742.95	6.32076
743.432	0.583603
743.914	0.340149
744.396	9.08656
744.878	14.7533
745.361	9.94505
745.843	1.6537
746.325	0.359436
746.807	4.83795
747.289	7.54735
747.771	6.04134
748.253	4.6971
748.735	4.28307
749.217	4.56003
749.699	5.58232
750.182	7.02927
750.664	7.94682
751.146	7.68692
751.628	7.23305
752.11	7.31724
752.592	7.70998
753.074	7.76949
753.557	7.59712
754.039	8.7019
754.521	12.1984
755.003	15.7933
755.485	14.0433
755.967	5.98585
756.449	2.04804
756.931	4.04982
757.413	6.02467
757.895	5.13129
758.378	2.99249
758.86	1.55991
759.342	0.587494
759.824	2.31387
760.306	11.1745
760.788	17.6786
761.27	16.1994
761.752	11.9293
762.235	10.294
762.717	11.7246
763.199	13.5828
763.681	14.2768
764.163	14.9205
764.645	17.322
765.127	20.5899
765.609	22.4277
766.091	22.5925
766.574	22.1566
767.056	21.695
767.538	21.4267
768.02	22.3552
768.502	24.9735
768.984	24.318
769.466	17.4281
769.948	13.8589
770.431	20.8937
770.913	31.4658
771.395	35.0014
771.877	30.8652
772.359	26.4964
772.841	21.5965
773.323	17.9432
773.805	16.4582
774.288	16.4631
774.77	17.3473
775.252	18.84
775.734	20.7979
776.216	23.3635
776.698	25.7965
777.18	27.5269
777.662	28.4058
778.144	27.6114
778.626	25.3254
779.109	23.757
779.591	24.2948
780.073	25.2096
780.555	22.7215
781.037	16.2302
781.519	12.8534
782.001	14.2669
782.484	14.1473
782.966	8.49539
783.448	1.67969
783.93	0.542328
784.412	1.89912
784.894	4.72635
785.376	7.77998
785.858	11.1806
786.34	15.8692
786.822	20.1275
787.305	22.3754
787.787	22.9491
788.269	23.4338
788.751	24.25
789.233	25.9757
789.715	30.156
790.197	35.0343
790.679	37.7081
791.162	38.3316
791.644	38.8612
792.126	40.146
792.608	40.7415
793.09	37.9006
793.572	32.2752
794.054	31.1392
794.536	35.4717
795.019	37.8224
795.501	35.1612
795.983	31.8008
796.465	32.2278
796.947	35.9879
797.429	38.1697
797.911	37.6914
798.393	37.1442
798.875	36.0097
799.357	35.4572
799.84	36.4271
800.322	38.3821
800.804	40.4888
801.286	42.6859
801.768	44.0196
802.25	43.7436
802.732	42.6156
803.215	41.1949
803.697	39.4896
804.179	37.1926
804.661	34.3723
805.143	31.7507
805.625	29.5785
806.107	28.4996
806.589	31.4936
807.071	37.5797
807.553	37.9905
808.036	30.82
808.518	25.1598
809	27.5049
809.482	34.4327
809.964	37.3444
810.446	35.4744
810.928	32.1964
811.41	25.6796
811.893	20.7205
812.375	19.922
812.857	21.1488
813.339	22.3248
813.821	23.4084
814.303	23.8845
814.785	24.3262
815.267	23.3184
815.75	18.5533
816.232	13.5573
816.714	11.6679
817.196	12.4823
817.678	14.183
818.16	16.5827
818.642	16.9325
819.124	9.29326
819.606	0.133583
820.089	1.72764
820.571	11.3796
821.053	16.6587
821.535	13.3764
822.017	7.91068
822.499	7.49763
822.981	10.654
823.463	10.9944
823.946	8.43747
824.428	4.86964
824.91	0.113464
825.392	3.1676
825.874	2.53238
826.356	0.637596
826.838	2.30875
827.32	2.3466
827.802	1.76033
828.284	2.15929
828.767	3.31611
829.249	4.42206
829.731	13.7508
830.213	14.8827
830.695	7.35226
831.177	1.30974
831.659	1.5611
832.141	1.57657
832.624	3.0779
833.106	9.07743
833.588	14.0638
834.07	17.2581
834.552	17.3865
835.034	13.3563
835.516	9.14225
835.998	8.8366
836.481	10.5229
836.963	10.8715
837.445	10.3527
837.927	11.6092
838.409	15.477
838.891	19.2376
839.373	19.7332
839.855	17.9301
840.337	17.5087
840.82	18.5008
841.302	18.6454
841.784	17.1824
842.266	16.8364
842.748	20.096
843.23	24.8988
843.712	25.8446
844.194	21.4826
844.677	18.0866
845.159	15.8016
845.641	14.2677
846.123	13.0672
846.605	12.7817
847.087	14.5144
847.569	18.0524
848.051	20.7583
848.533	22.2565
849.016	22.92
849.498	21.8357
849.98	20.8595
850.462	21.6788
850.944	23.7238
851.426	25.6886
851.908	27.3188
852.39	28.4464
852.872	28.4971
853.355	28.3954
853.837	28.647
854.319	29.6548
854.801	32.9679
855.283	38.3559
855.765	42.5237
856.247	42.9399
856.729	40.897
857.212	37.4669
857.694	33.5303
858.176	34.1084
858.658	39.4343
859.14	42.3078
859.622	39.0383
860.104	34.2782
860.586	34.7621
861.068	40.3036
861.551	46.1945
862.033	53.3767
862.515	57.0655
862.997	55.4617
863.479	51.5129
863.961	46.0019
864.443	40.1472
864.925	39.1018
865.408	46.497
865.89	51.1159
866.372	51.4178
866.854	50.9334
867.336	51.0019
867.818	50.8537
868.3	48.7768
868.782	45.0106
869.264	43.6764
869.747	48.7577
870.229	52.6485
870.711	52.1718
871.193	49.4861
871.675	44.934
872.157	40.1233
872.639	38.817
873.121	42.4632
873.604	44.7253
874.086	39.3634
874.568	31.6115
875.05	27.5233
875.532	25.5397
876.014	22.0425
876.496	16.5271
876.978	10.5786
877.46	4.83864
877.943	1.00789
878.425	3.71047
878.907	10.6882
879.389	13.1989
879.871	10.9114
880.353	7.55017
880.835	4.5626
881.317	2.05749
881.799	0.327744
882.282	0.870613
882.764	3.93694
883.246	9.79353
883.728	10.632
884.21	3.76125
884.692	3.88676
885.174	8.37752
885.656	9.93906
886.139	8.82838
886.621	3.92609
887.103	1.79315
887.585	3.72672
888.067	6.02647
888.549	8.63021
889.031	10.4246
889.513	9.70507
889.995	7.2274
890.478	6.32584
890.96	8.46998
891.442	9.76872
891.924	9.38442
892.406	8.37242
892.888	7.35279
893.37	6.01125
893.852	3.27759
894.335	0.730415
894.817	3.06334
895.299	1.22071
895.781	0.994141
896.263	1.65209
896.745	1.59571
897.227	1.48602
897.709	1.47802
898.192	1.64133
898.674	2.00003
899.156	2.55537
899.638	3.38181
900.12	4.34577
900.602	5.19103
901.084	6.0728
901.566	7.53021
902.048	9.48434
902.53	11.0074
903.013	11.4409
903.495	11.529
903.977	12.3273
904.459	13.5854
904.941	14.407
905.423	14.8059
905.905	15.5834
906.388	16.9929
906.87	16.332
907.352	10.0893
907.834	1.3548
908.316	1.00334
908.798	9.20861
909.28	12.7907
909.762	9.72161
910.244	7.4267
910.726	9.99912
911.209	13.5267
911.691	11.9735
912.173	5.4314
912.655	1.52881
913.137	0.656715
913.619	1.16926
914.101	3.32359
914.583	5.89062
915.066	8.57757
915.548	10.9695
916.03	11.1749
916.512	8.47826
916.994	7.10167
917.476	8.07162
917.958	9.04496
918.44	9.85953
918.923	10.0788
919.405	8.97774
919.887	6.89076
920.369	4.87439
920.851	1.70932
921.333	1.47612
921.815	8.66608
922.297	14.3939
922.779	12.2631
923.261	7.95593
923.744	8.62778
924.226	14.2088
924.708	19.0595
925.19	22.3819
925.672	23.2577
926.154	19.3554
926.636	14.6843
927.119	11.5015
927.601	10.2686
928.083	12.471
928.565	17.8889
929.047	20.9386
929.529	16.2643
930.011	10.6922
930.493	9.76295
930.975	10.5658
931.457	9.07839
931.94	5.99136
932.422	4.45615
932.904	5.594
933.386	7.60403
933.868	9.19695
934.35	10.5782
934.832	11.9207
935.314	13.2786
935.797	15.1061
936.279	17.1938
936.761	17.9682
937.243	16.5893
937.725	14.0376
938.207	10.1578
938.689	6.52974
939.171	7.623
939.654	12.2806
940.136	16.847
940.618	20.0041
941.1	18.6455
941.582	10.3516
942.064	0.743988
942.546	0.201477
943.028	6.3858
943.51	8.59734
943.993	6.7106
944.475	5.19683
944.957	5.40488
945.439	6.21319
945.921	6.5275
946.403	6.65012
946.885	7.45472
947.367	8.94201
947.85	11.0504
948.332	13.9748
948.814	14.8844
949.296	12.3743
949.778	9.00452
950.26	7.62686
950.742	7.88413
951.224	7.91042
951.706	7.66159
952.188	7.22061
952.671	6.56753
953.153	6.18519
953.635	6.24789
954.117	6.37518
954.599	5.98166
955.081	5.15762
955.563	6.23487
956.045	10.6003
956.528	12.3915
957.01	9.63191
957.492	6.951
957.974	7.29561
958.456	8.64418
958.938	7.36765
959.42	3.10866
959.902	1.49121
960.385	4.24926
960.867	0.258652
961.349	6.68939
961.831	10.2481
962.313	11.0888
962.795	1.07275
963.277	5.07496
963.759	3.45867
964.241	1.61156
964.724	7.5856
965.206	0.853683
965.688	4.9295
966.17	5.05405
966.652	7.81616
967.134	4.91727
967.616	3.76393
968.098	8.26501
968.581	9.63464
969.063	6.0835
969.545	9.00162
970.027	0.3563
970.509	1.79659
970.991	7.57873
971.473	4.26642
971.955	7.2718
972.437	7.89355
972.92	2.36704
973.402	6.29979
973.884	3.59215
974.366	2.95925
974.848	1.15244
975.33	1.83151
975.812	4.9882
976.294	5.46967
976.777	2.33076
977.259	1.80408
977.741	7.30157
978.223	12.4996
978.705	18.6993
979.187	22.6159
979.669	18.669
980.151	9.48749
980.633	5.27232
981.115	10.0397
981.598	14.0887
982.08	13.6322
982.562	12.8243
983.044	14.1999
983.526	16.0525
984.008	16.7665
984.49	16.1297
984.972	13.9768
985.455	9.40594
985.937	5.88681
986.419	4.48401
986.901	4.67287
987.383	7.66709
987.865	11.0337
988.347	11.5495
988.829	9.65625
989.312	8.63355
989.794	9.98738
990.276	10.705
990.758	8.3125
991.24	6.40282
991.722	7.81613
992.204	10.3261
992.686	11.0137
993.168	9.85232
993.651	8.52213
994.133	7.59126
994.615	6.51222
995.097	3.67692
995.579	2.08024
996.061	5.68854
996.543	10.497
997.025	10.3997
997.508	6.22923
997.99	4.88067
998.472	9.88934
998.954	14.3569
999.436	15.6364
999.918	14.6615
1000.4	10.2698
1000.88	5.34155
1001.36	3.29385
1001.85	4.06236
1002.33	5.42938
1002.81	6.80008
1003.29	8.1685
1003.77	10.1097
1004.26	11.4349
1004.74	11.4293
1005.22	10.2402
1005.7	7.00417
1006.19	2.72247
1006.67	0.991928
1007.15	3.53453
1007.63	7.00908
1008.11	11.2964
1008.6	14.4591
1009.08	15.0695
1009.56	13.9342
1010.04	10.9547
1010.52	7.18281
1011.01	6.11301
1011.49	9.93322
1011.97	12.3056
1012.45	9.16972
1012.93	5.30097
1013.42	2.46806
1013.9	1.32076
1014.38	3.57445
1014.86	8.02696
1015.35	10.9638
1015.83	11.5013
1016.31	9.87026
1016.79	2.73475
1017.27	2.50741
1017.76	0.020645
1018.24	4.94964
1018.72	7.06965
1019.2	6.76041
1019.68	6.71204
1020.17	7.50683
1020.65	8.7869
1021.13	12.266
1021.61	13.9779
1022.1	10.8505
1022.58	6.2019
1023.06	1.47563
1023.54	1.83216
1024.02	0.399261
1024.51	7.60383
1024.99	12.3468
1025.47	8.569
1025.95	4.64617
1026.43	3.90075
1026.92	4.02023
1027.4	3.12091
1027.88	1.58869
1028.36	0.207779
1028.85	1.14651
1029.33	0.390343
1029.81	6.24064
1030.29	10.3265
1030.77	5.47759
1031.26	1.52799
1031.74	7.65382
1032.22	17.8061
1032.7	20.2608
1033.18	13.4256
1033.67	7.97082
1034.15	5.61079
1034.63	4.4193
1035.11	4.03167
1035.6	4.51369
1036.08	6.03842
1036.56	8.48733
1037.04	13.0129
1037.52	19.8274
1038.01	20.5965
1038.49	8.40308
1038.97	1.32292
1039.45	3.38058
1039.93	6.84659
1040.42	9.73351
1040.9	11.1327
1041.38	9.21198
1041.86	4.41744
1042.34	1.72722
1042.83	2.00034
1043.31	2.52272
1043.79	3.02185
1044.27	4.20361
1044.76	7.05884
1045.24	9.64321
1045.72	9.61363
1046.2	7.7331
1046.68	7.95334
1047.17	12.2047
1047.65	11.2
1048.13	1.84032
1048.61	3.51886
1049.09	0.257698
1049.58	6.06407
1050.06	11.4599
1050.54	15.1584
1051.02	14.2082
1051.51	7.85709
1051.99	4.42248
1052.47	4.20133
1052.95	6.124
1053.43	9.74559
1053.91	11.4655
1054.4	8.86227
1054.88	4.6365
1055.36	4.02047
1055.84	6.60247
1056.33	6.99481
1056.81	5.21786
1057.29	5.64408
1057.77	9.0391
1058.25	13.2186
1058.74	17.2169
1059.22	19.2497
1059.7	16.0926
1060.18	9.76771
1060.66	7.61334
1061.15	8.71054
1061.63	7.32563
1062.11	3.39871
1062.59	2.4915
1063.08	6.62989
1063.56	11.2401
1064.04	11.7983
1064.52	10.2891
1065	10.2866
1065.49	11.0792
1065.97	11.0249
1066.45	10.1003
1066.93	8.36277
1067.41	6.08038
1067.9	4.83747
1068.38	5.99275
1068.86	7.57851
1069.34	7.47574
1069.83	6.34995
1070.31	4.13823
1070.79	2.04108
1071.27	3.13068
1071.75	6.83437
1072.24	8.58637
1072.72	5.99732
1073.2	3.64955
1073.68	5.29392
1074.16	8.11211
1074.65	10.6915
1075.13	12.2762
1075.61	11.9256
1076.09	10.1519
1076.58	8.54301
1077.06	7.50574
1077.54	6.93582
1078.02	5.41708
1078.5	6.17715
1078.98	14.6224
1079.47	22.1608
1079.95	20.7231
1080.43	14.0173
1080.91	8.14841
1081.4	3.91563
1081.88	1.88492
1082.36	3.54216
1082.84	5.11797
1083.32	6.4253
1083.81	7.0866
1084.29	6.32375
1084.77	5.27774
1085.25	5.23457
1085.73	6.01666
1086.22	6.79357
1086.7	8.23283
1087.18	7.61497
1087.66	3.02311
1088.14	0.32589
1088.63	1.87197
1089.11	4.17648
1089.59	4.81943
1090.07	4.32104
1090.56	3.59473
1091.04	2.57691
1091.52	3.46172
1092	6.69379
1092.48	8.88219
1092.97	9.49056
1093.45	9.73341
1093.93	10.5027
1094.41	10.5367
1094.89	7.78242
1095.38	3.45325
1095.86	2.64168
1096.34	4.71851
1096.82	4.12648
1097.31	0.88382
1097.79	0.224663
1098.27	2.27634
1098.75	6.33404
1099.23	10.6974
1099.72	14.0998
1100.2	14.48
1100.68	12.55
1101.16	7.63361
1101.64	2.22607
1102.13	4.30349
1102.61	12.8535
1103.09	17.3273
1103.57	12.5762
1104.06	6.42505
1104.54	5.39146
1105.02	5.82529
1105.5	4.66869
1105.98	2.80559
1106.47	0.175743
1106.95	1.74176
1107.43	0.029762
1107.91	5.8376
1108.39	10.4146
1108.88	13.0569
1109.36	11.9057
1109.84	0.856163
1110.32	8.12575
1110.81	5.53998
1111.29	1.78656
1111.77	5.72925
1112.25	6.34669
1112.73	7.0019
1113.21	7.94106
1113.7	9.02039
1114.18	11.4
1114.66	12.0259
1115.14	9.21578
1115.63	5.82249
1116.11	3.31339
1116.59	1.9531
1117.07	2.63149
1117.56	5.36808
1118.04	5.34828
1118.52	1.75048
1119	0.120575
1119.48	1.28505
1119.96	3.54607
[truncated: 232 more rows]

## Sheet: MagnetiteStandard
Column1	Column2
198.185	0
198.667	11.0102
199.149	12.0146
199.631	2.34766
200.113	3.11572
200.595	16.7151
201.077	41.2175
201.559	60.4353
202.042	69.8027
202.524	55.3643
203.006	24.3689
203.488	1.61621
203.97	0.14502
204.452	30.676
204.934	48.4397
205.416	43.9885
205.898	40.561
206.38	44.2361
206.863	50.5132
207.345	57.2449
207.827	64.6738
208.309	73.521
208.791	70.1162
209.273	38.1372
209.755	12.7336
210.238	2.22107
210.72	4.25818
211.202	14.988
211.684	30.5615
212.166	51.8042
212.648	57.4862
213.13	31.4271
213.612	13.0442
214.094	7.70679
214.577	7.71033
215.059	11.5386
215.541	15.9432
216.023	21.4805
216.505	30.3644
216.987	47.3865
217.469	61.346
217.951	70.9822
218.434	75.467
218.916	72.0125
219.398	57.3859
219.88	35.5892
220.362	19.0167
220.844	7.19934
221.326	2.78845
221.808	11.4507
222.29	23.713
222.773	28.542
223.255	20.5459
223.737	7.17114
224.219	0.012817
224.701	5.64502
225.183	9.354
225.665	2.8374
226.147	4.84741
226.629	2.12036
227.112	16.4446
227.594	38.6796
228.076	39.8771
228.558	8.83582
229.04	13.4569
229.522	12.6722
230.004	3.51306
230.486	3.60962
230.969	5.81104
231.451	5.62097
231.933	6.84729
232.415	10.0825
232.897	12.4403
233.379	12.3174
233.861	11.8002
234.343	12.3674
234.825	14.2545
235.307	16.1819
235.79	14.538
236.272	8.01489
236.754	10.4678
237.236	39.3002
237.718	65.6577
238.2	67.2375
238.682	44.8265
239.165	23.6725
239.647	32.3023
240.129	69.4973
240.611	87.5763
241.093	67.1124
241.575	41.6718
242.057	34.1807
242.539	41.7427
243.021	47.7137
243.503	37.1324
243.986	14.0151
244.468	0.237915
244.95	0.507446
245.432	4.84106
245.914	15.1669
246.396	27.9226
246.878	35.9139
247.361	33.6062
247.843	24.0464
248.325	12.8883
248.807	3.59082
249.289	12.2236
249.771	3.66321
250.253	32.1499
250.735	52.0057
251.217	51.7266
251.699	40.9989
252.182	32.5643
252.664	26.1769
253.146	23.6451
253.628	27.9966
254.11	36.4739
254.592	44.9283
255.074	52.4305
255.556	59.8509
256.039	71.0792
256.521	84.938
257.003	92.1851
257.485	85.6182
257.967	71.2987
258.449	60.889
258.931	55.1836
259.413	52.3058
259.896	51.3126
260.378	52.1853
260.86	55.9675
261.342	65.7799
261.824	74.8551
262.306	69.384
262.788	44.6084
263.27	24.1699
263.752	19.1502
264.234	24.5706
264.717	30.0276
265.199	32.3624
265.681	35.8076
266.163	49.2302
266.645	75.2054
267.127	91.8884
267.609	88.1034
268.091	76.0255
268.574	69.7373
269.056	71.6577
269.538	76.2826
270.02	78.3877
270.502	77.4636
270.984	75.4206
271.466	72.4943
271.948	68.1787
272.431	59.0243
272.913	46.6289
273.395	40.2824
273.877	48.5861
274.359	71.368
274.841	87.0239
275.323	91.8323
275.805	94.4606
276.287	98.8806
276.77	103.937
277.252	105.643
277.734	100.948
278.216	92.1081
278.698	90.6704
279.18	102.551
279.662	114.886
280.144	129.662
280.626	142.566
281.109	146.018
281.591	136.897
282.073	122.624
282.555	120.422
283.037	142.803
283.519	157.824
284.001	163.427
284.483	163.086
284.966	157.624
285.448	147.778
285.93	136.343
286.412	126.424
286.894	115.779
287.376	111.655
287.858	123.421
288.34	133.86
288.823	129.902
289.305	115.13
289.787	105.666
290.269	119.979
290.751	157.6
291.233	172.555
291.715	139.832
292.197	112.121
292.679	110.439
293.161	125.775
293.644	141.315
294.126	147.987
294.608	147.851
295.09	146.428
295.572	142.734
296.054	139.563
296.536	138.327
297.018	137.826
297.501	135.797
297.983	130.206
298.465	127.23
298.947	139.147
299.429	168.17
299.911	186.91
300.393	179.896
300.875	164.369
301.358	155.61
301.84	154.773
302.322	159.012
302.804	171.29
303.286	188.238
303.768	194.982
304.25	185.385
304.732	172.665
305.214	164.511
305.697	161.155
306.179	164.806
306.661	183.578
307.143	207.868
307.625	222.789
308.107	222.604
308.589	216.119
309.071	210.111
309.553	205.348
310.036	204.089
310.518	214.63
311	221.501
311.482	212.936
311.964	192.187
312.446	168.283
312.928	144.095
313.41	122.641
313.892	114.639
314.375	135.188
314.857	147.8
315.339	136.506
315.821	115.89
316.303	107.228
316.785	117.555
317.267	135.309
317.75	141.706
318.232	131.803
318.714	119.184
319.196	95.3535
319.678	75.2576
320.16	70.7541
320.642	81.5698
321.124	98.3487
321.606	112.999
322.089	125.95
322.571	132.539
323.053	123.439
323.535	117.209
324.017	126.624
324.499	142.034
324.981	143.33
325.463	115.861
325.945	71.6256
326.428	53.2245
326.91	73.5533
327.392	95.7527
327.874	113.966
328.356	128.142
328.838	139.288
329.32	148.046
329.802	149.332
330.284	131.291
330.767	91.8851
331.249	66.0498
331.731	68.1081
332.213	78.5643
332.695	83.0633
333.177	81.6342
333.659	79.7135
334.141	83.5189
334.624	88.9844
335.106	82.1907
335.588	57.2767
336.07	36.9099
336.552	47.2164
337.034	77.8629
337.516	94.2821
337.998	83.8927
338.48	63.7666
338.963	42.2699
339.445	21.1654
339.927	11.7345
340.409	23.448
340.891	47.4895
341.373	56.869
341.855	43.4172
342.337	31.8815
342.819	27.5338
343.302	29.4362
343.784	39.1726
344.266	57.1168
344.748	74.4928
345.23	79.0271
345.712	66.0785
346.194	52.1805
346.677	32.1237
347.159	15.4954
347.641	7.73621
348.123	8.75793
348.605	16.9242
349.087	32.7096
349.569	54.8335
350.051	63.4231
350.533	38.7405
351.016	23.2505
351.498	32.5006
351.98	52.5717
352.462	66.1444
352.944	66.457
353.426	58.1558
353.908	50.7496
354.39	44.1161
354.872	39.2296
355.355	37.6149
355.837	36.9875
356.319	36.8021
356.801	36.7744
357.283	35.4357
357.765	27.6448
358.247	16.6732
358.729	19.5719
359.211	44.5292
359.694	67.634
360.176	71.9277
360.658	62.0557
361.14	45.6616
361.622	9.37256
362.104	20.3077
362.586	3.54175
363.069	52.2919
363.551	81.8149
364.033	44.9608
364.515	26.7045
364.997	56.6812
365.479	32.1656
365.961	3.50952
366.443	22.2612
366.925	41.533
367.408	47.1046
367.89	37.9836
368.372	22.5176
368.854	8.7417
369.336	5.68884
369.818	4.4137
370.3	31.9633
370.782	63.2139
371.264	64.7965
371.747	45.7048
372.229	29.0762
372.711	28.9908
373.193	42.5637
373.675	60.4872
374.157	98.4646
374.639	113.934
375.121	81.104
375.603	38.1843
376.086	19.3861
376.568	32.824
377.05	56.0309
377.532	62.8145
378.014	52.3514
378.496	47.3269
378.978	55.8352
379.46	62.011
379.943	53.4724
380.425	34.2874
380.907	19.7882
381.389	20.5804
381.871	27.6902
382.353	26.1248
382.835	15.3301
383.317	6.16907
383.799	3.35229
384.282	6.15015
384.764	13.595
385.246	30.9299
385.728	41.9861
386.21	35.6974
386.692	19.8768
387.174	6.63013
387.656	1.05933
388.138	4.45044
388.621	4.78223
389.103	1.56958
389.585	3.24194
390.067	14.6364
390.549	22.9045
391.031	18.7834
391.513	7.17285
391.996	1.82202
392.478	12.1753
392.96	32.0098
393.442	35.9896
393.924	4.65857
394.406	10.5574
394.888	7.35681
395.37	35.4388
395.852	55.8156
396.335	64.0987
396.817	66.6276
397.299	72.0621
397.781	80.1822
398.263	73.0856
398.745	35.3087
399.227	4.15332
399.709	5.08325
400.191	27.7675
400.674	49.6457
401.156	64.7159
401.638	73.3313
402.12	73.8921
402.602	66.9183
403.084	59.1879
403.566	52.7338
404.048	47.8051
404.53	45.3966
405.013	46.3522
405.495	46.2353
405.977	40.4879
406.459	35.0157
406.941	39.7924
407.423	54.6608
407.905	66.4614
408.387	61.7837
408.87	40.458
409.352	22.7684
409.834	3.96326
410.316	6.34387
410.798	1.0238
411.28	16.5529
411.762	26.8213
412.244	26.5046
412.727	21.8101
413.209	24.5435
413.691	37.7604
414.173	47.0295
414.655	50.5669
415.137	50.2771
415.619	45.1106
416.101	36.3132
416.583	28.0936
417.065	22.8804
417.548	20.0311
418.03	18.8016
418.512	19.5577
418.994	19.572
419.476	15.9113
419.958	10.1023
420.44	9.58862
420.922	15.3038
421.405	21.702
421.887	25.4014
422.369	26.5873
422.851	31.3059
423.333	44.3124
423.815	55.0154
424.297	48.7384
424.779	22.0868
425.262	5.28723
425.744	2.05981
426.226	3.40686
426.708	7.68774
427.19	13.1641
427.672	18.5842
428.154	23.4536
428.636	28.0823
429.118	35.5311
429.601	51.0497
430.083	55.7605
430.565	36.444
431.047	15.7487
431.529	7.62732
432.011	10.7067
432.493	13.1655
432.975	6.49268
433.457	17.9784
433.94	31.6809
434.422	35.2969
434.904	1.59119
435.386	13.8174
435.868	8.26465
436.35	1.84973
436.832	24.6119
437.314	6.39783
437.797	15.8938
438.279	16.9042
438.761	27.5991
439.243	17.2064
439.725	13.3544
440.207	30.5906
440.689	12.6355
441.171	3.54773
441.654	0.358032
442.136	8.66028
442.618	23.0477
443.1	38.9148
443.582	51.0844
444.064	57.4048
444.546	59.0668
445.028	57.5942
445.51	51.7988
445.992	46.3193
446.475	40.7006
446.957	36.8042
447.439	38.1119
447.921	42.1334
448.403	41.3245
448.885	27.3506
449.367	9.14416
449.849	3.03992
450.332	9.71179
450.814	17.9135
451.296	25.4354
451.778	29.5747
452.26	23.5352
452.742	5.0022
453.224	6.74475
453.706	2.81628
454.189	8.9259
454.671	22.1769
455.153	35.3584
455.635	46.3748
456.117	53.9268
456.599	57.8158
457.081	55.8477
457.563	38.9907
458.045	27.2794
458.527	21.0696
459.01	22.1694
459.492	38.3878
459.974	69.0599
460.456	95.0051
460.938	89.1072
461.42	51.6399
461.902	28.2906
462.384	25.6312
462.867	27.6162
463.349	28.1377
463.831	26.6743
464.313	20.943
464.795	5.41772
465.277	5.65234
465.759	4.97302
466.241	30.1798
466.724	47.9711
467.206	52.5526
467.688	47.3914
468.17	34.1693
468.652	11.3749
469.134	4.13769
469.616	9.96668
470.098	11.1991
470.58	8.86792
471.063	3.99646
471.545	2.1294
472.027	8.85706
472.509	15.9441
472.991	23.6224
473.473	34.084
473.955	38.7151
474.437	32.1454
474.919	23.3351
475.402	12.0126
475.884	1.45422
476.366	1.28442
476.848	23.9136
477.33	54.0273
477.812	66.5227
478.294	61.5341
478.776	51.2167
479.259	36.6366
479.741	23.173
480.223	22.4694
480.705	37.4719
481.187	47.1791
481.669	41.4684
482.151	33.2181
482.633	34.1906
483.116	43.3158
483.598	52.8479
484.08	57.8398
484.562	58.9915
485.044	58.5089
485.526	53.1898
486.008	51.9003
486.49	60.8207
486.972	69.5518
487.454	67.8258
487.937	56.8525
488.419	48.7283
488.901	55.6233
489.383	71.7551
489.865	79.9568
490.347	79.2427
490.829	75.3098
491.311	68.3264
491.794	62.2627
492.276	65.4875
492.758	81.1619
493.24	95.5414
493.722	104.557
494.204	109.432
494.686	111.677
495.168	110.942
495.651	106.535
496.133	95.9967
496.615	81.0952
497.097	74.6626
497.579	87.479
498.061	94.1326
498.543	88.8794
499.025	78.0338
499.507	66.3731
499.99	55.1892
500.472	45.3298
500.954	34.0212
501.436	24.167
501.918	30.7377
502.4	58.5819
502.882	83.1986
503.364	89.3219
503.846	85.8694
504.329	90.9636
504.811	109.19
505.293	124.198
505.775	131.265
506.257	131.099
506.739	120.842
507.221	102.083
507.703	86.0315
508.185	82.298
508.668	88.8221
509.15	89.6372
509.632	75.2159
510.114	69.1815
510.596	78.2511
511.078	92.9474
511.56	108.348
512.042	122.307
512.525	131.827
513.007	131.074
513.489	124.054
513.971	124.73
514.453	133.553
514.935	143.979
515.417	156.906
515.899	168.46
516.381	169.829
516.864	156.801
517.346	147.374
517.828	150.85
518.31	157.427
518.792	154.724
519.274	143.429
519.756	133.612
520.239	129.958
520.721	131.759
521.203	139.685
521.685	164.725
522.167	176.575
522.649	159.861
523.131	139.363
523.613	133.118
524.095	141.379
524.578	153.89
525.06	167.35
525.542	178.941
526.024	182.012
526.506	176.426
526.988	167.12
527.47	153.581
527.952	140.319
528.434	136.08
528.917	142.035
529.399	151.229
529.881	170.13
530.363	185.251
530.845	183.658
531.327	169.329
531.809	154.468
532.291	147.508
532.773	146.844
533.256	150.013
533.738	158.753
534.22	162.883
534.702	162.597
535.184	158.617
535.666	146.062
536.148	129.334
536.63	123.241
537.112	141.648
537.595	166.374
538.077	177.676
538.559	177.403
539.041	173.636
539.523	168.613
540.005	162.674
540.487	155.915
540.969	148.263
541.452	142.884
541.934	135.756
542.416	135.015
542.898	151.107
543.38	173.175
543.862	185.89
544.344	183.727
544.826	171.075
545.308	149.726
545.791	120.103
546.273	98.0488
546.755	85.7797
547.237	78.4947
547.719	74.6709
548.201	73.5681
548.683	74.0328
549.166	76.9729
549.648	79.5808
550.13	82.8467
550.612	84.0062
551.094	76.245
551.576	60.099
552.058	47.0343
552.54	47.6289
553.022	59.7283
553.505	65.9981
553.987	65.7729
554.469	60.3052
554.951	43.0487
555.433	26.1475
555.915	20.4799
556.397	26.1298
556.879	33.3514
557.362	34.9843
557.844	34.6625
558.326	39.1299
558.808	48.2274
559.29	58.0836
559.772	68.3884
560.254	76.1907
560.736	75.5647
561.218	61.8964
561.701	52.6346
562.183	51.5447
562.665	51.4773
563.147	48.2197
563.629	43.0941
564.111	39.8883
564.593	40.4124
565.075	41.0947
565.557	35.9113
566.04	24.65
566.522	13.4495
567.004	2.10998
567.486	7.82581
567.968	15.2116
568.45	20.416
568.932	23.7634
569.414	24.0674
569.896	24.3871
570.379	29.495
570.861	33.9934
571.343	28.2605
571.825	11.9471
572.307	5.50647
572.789	16.4916
573.271	21.1998
573.753	20.2119
574.235	6.44995
574.718	0.213867
575.2	16.5847
575.682	33.2727
576.164	29.2218
576.646	5.74023
577.128	12.3776
577.61	6.69873
578.093	8.11169
578.575	14.3556
579.057	12.842
579.539	8.04919
580.021	0.727173
580.503	4.64062
580.985	0.018433
581.467	19.8862
581.949	29.2878
582.432	18.6686
582.914	9.45459
583.396	12.566
583.878	20.976
584.36	23.6173
584.842	16.8414
585.324	6.99622
585.806	0.384277
586.289	5.31885
586.771	7.55176
587.253	6.69214
587.735	4.66614
588.217	0.299194
588.699	4.39734
589.181	5.97009
589.663	46.9801
590.145	69.1888
590.628	53.1974
591.11	24.9221
591.592	1.26746
592.074	21.4701
592.556	32.7644
593.038	33.0098
593.52	24.9836
594.002	11.7665
594.484	8.1272
594.967	19.1827
595.449	14.9917
595.931	7.375
596.413	7.70435
596.895	12.7693
597.377	11.7396
597.859	2.01697
598.341	16.3196
598.823	28.0394
599.306	35.9098
599.788	35.3367
600.27	27.0641
600.752	20.6115
601.234	24.8453
601.716	38.0653
602.198	50.4383
602.68	63.6417
603.162	71.864
603.645	67.6818
604.127	62.4828
604.609	65.7306
605.091	77.0577
605.573	88.6558
606.055	98.9226
606.537	107.043
607.019	111.715
607.502	113.666
607.984	114.263
608.466	113.972
608.948	114.079
609.43	116.514
609.912	121.618
610.394	124.623
610.876	126.43
611.359	124.604
611.841	109.171
612.323	95.3829
612.805	104.469
613.287	139.087
613.769	167.105
614.251	162.674
614.733	144.871
615.216	140.242
615.698	147.935
616.18	156.062
616.662	159.023
617.144	161.533
617.626	172.519
618.108	196.23
618.59	213.346
619.072	226.103
619.555	229.678
620.037	212.513
620.519	188.927
621.001	178.983
621.483	188.385
621.965	205.951
622.447	230.826
622.929	255.088
623.411	256.868
623.894	236.186
624.376	221.706
624.858	229.821
625.34	251.468
625.822	265.943
626.304	267.425
626.786	274.897
627.268	302.331
627.75	321.244
628.233	302.771
628.715	269.991
629.197	269.787
629.679	323.594
630.161	382.919
630.643	391.627
631.125	368.087
631.607	364.088
632.089	384.976
632.572	415.197
633.054	449.559
633.536	482.589
634.018	498.711
634.5	474.732
634.982	471.282
635.464	506.209
635.946	547.008
636.429	574.025
636.911	591.868
637.393	614.596
637.875	649.182
638.357	683.429
638.839	701.51
639.321	708.846
639.803	722.523
640.286	744.898
640.768	771.222
641.25	799.142
641.732	827.715
642.214	853.712
642.696	869.755
643.178	894.455
643.66	935.827
644.143	977.706
644.625	1009.82
645.107	1035.41
645.589	1063.42
646.071	1098.64
646.553	1134.66
647.035	1160.87
647.517	1179.89
647.999	1208.86
648.482	1252.61
648.964	1306.01
649.446	1368.2
649.928	1432.64
650.41	1477.21
650.892	1472.81
651.374	1494.61
651.856	1566.08
652.338	1641.24
652.821	1694.12
653.303	1729.71
653.785	1761.55
654.267	1793.88
654.749	1826
655.231	1858.61
655.713	1890.87
656.195	1916.6
656.677	1935.32
657.16	1960.99
657.642	2005.65
658.124	2060.93
658.606	2098.52
659.088	2109.73
659.57	2118.48
660.052	2118.52
660.534	2123.09
661.016	2143.72
661.499	2173.26
661.981	2194.4
662.463	2197.93
662.945	2205.14
663.427	2246.03
663.909	2298.93
664.391	2320.13
664.873	2306.85
665.356	2280.73
665.838	2253.42
666.32	2227.6
666.802	2212.03
667.284	2216.18
667.766	2206.7
668.248	2163.95
668.73	2127.27
669.213	2120.37
669.695	2128.91
670.177	2126.48
670.659	2104.54
671.141	2080.83
671.623	2072.91
672.105	2065.54
672.587	2037.39
673.07	1989.35
673.552	1932.02
674.034	1869.56
674.516	1810.57
674.998	1774.65
675.48	1768.39
675.962	1750.41
676.444	1710.71
676.926	1673.96
677.409	1656.17
677.891	1646.81
678.373	1633.63
678.855	1617.61
679.337	1588.67
679.819	1528.62
680.301	1465.23
680.783	1420.83
681.265	1394.06
681.748	1384.15
682.23	1389.93
682.712	1388.59
683.194	1337.45
683.676	1239.2
684.158	1185.86
684.64	1192.53
685.122	1193.44
685.604	1155.71
686.087	1101.28
686.569	1064.93
687.051	1048.76
687.533	1031.7
688.015	1014.98
688.497	992.856
688.979	955.783
689.461	914.284
689.943	882.586
690.426	864.342
690.908	854.941
691.39	855.25
691.872	859.619
692.354	847.499
692.836	819.12
693.318	807.827
693.8	757.136
694.283	762.658
694.765	754.548
695.247	733.54
695.729	679.7
696.211	666.44
696.693	652.315
697.175	628.053
697.657	599.535
698.14	570.797
698.622	542.975
699.104	517.717
699.586	494.106
700.068	476.133
700.55	473.636
701.032	477.889
701.514	469.003
701.997	443.387
702.479	424.226
702.961	433.957
703.443	462.779
703.925	461.6
704.407	415.657
704.889	377.647
705.371	356.217
705.853	339.142
706.336	317.367
706.818	294.521
707.3	281.046
707.782	283.07
708.264	286.49
708.746	286.947
709.228	283.469
709.71	273.657
710.192	258.66
710.675	241.766
711.157	224.474
711.639	207.802
712.121	191.334
712.603	176.258
713.085	176.907
713.567	200.104
714.049	212.04
714.531	189.554
715.014	149.8
715.496	126.023
715.978	121.028
716.46	120.656
716.942	132.768
717.424	140.508
717.906	131.627
718.388	115.561
718.87	106.273
719.353	106.776
719.835	108.864
720.317	107.693
720.799	103.251
721.281	92.3729
721.763	76.8962
722.245	66.2339
722.727	63.4778
723.21	64.4104
723.692	64.6229
724.174	64.1562
724.656	64.2163
725.138	66.344
725.62	66.1373
726.102	59.5855
726.584	53.5791
727.067	52.3992
727.549	55.3534
728.031	56.4963
728.513	54.4875
728.995	50.1371
729.477	40.4415
729.959	30.6229
730.441	28.5195
730.924	32.9417
731.406	34.9801
731.888	28.8838
732.37	20.391
732.852	22.6395
733.334	34.5128
733.816	33.058
734.298	13.3671
734.78	5.17847
735.263	11.3638
735.745	10.7986
736.227	16.0837
736.709	31.9368
737.191	41.4519
737.673	42.4039
738.155	38.8816
738.637	33.4636
739.119	25.5216
739.602	12.4485
740.084	5.72461
740.566	18.8849
741.048	16.4899
741.53	8.86304
742.012	7.9989
742.494	12.3801
742.976	18.2281
743.458	23.9563
743.941	26.5552
744.423	22.8621
744.905	15.0856
745.387	12.2855
745.869	15.6209
746.351	16.3373
746.833	9.6239
747.315	4.03125
747.797	6.92786
748.28	16.964
748.762	28.0759
749.244	47.6337
749.726	57.0814
750.208	40.1976
750.69	23.0356
751.172	31.5333
751.654	54.6769
752.137	65.1296
752.619	51.1498
753.101	31.9906
753.583	25.756
754.065	27.6219
754.547	25.9625
755.029	20.9735
755.511	23.8572
755.994	39.8472
756.476	53.3983
756.958	37.8218
757.44	9.35327
757.922	26.7997
758.404	2.72412
758.886	25.5297
759.368	21.3011
759.851	8.3634
760.333	5.91724
760.815	12.3843
761.297	11.8935
761.779	7.5946
762.261	22.553
762.743	22.6046
763.225	15.5255
763.707	6.53052
764.19	2.03674
764.672	6.62744
765.154	4.72778
765.636	0.595459
766.118	2.02026
766.6	2.43384
767.082	3.38831
767.564	15.2188
768.046	24.6183
768.529	27.4114
769.011	23.8513
769.493	12.7124
769.975	8.68713
770.457	20.2803
770.939	16.9923
771.421	12.6069
771.903	13.886
772.385	14.8541
772.868	8.1676
773.35	6.1803
773.832	19.1985
774.314	27.5509
774.796	36.3403
775.278	52.4001
775.76	66.9529
776.242	69.8743
776.724	61.4261
777.207	47.2672
777.689	27.6409
778.171	12.0023
778.653	18.3531
779.135	38.0685
779.617	44.0889
780.099	34.4482
780.581	28.1416
781.064	36.3449
781.546	51.4149
782.028	59.7018
782.51	61.3195
782.992	52.8677
783.474	22.2587
783.956	7.56134
784.438	39.1243
784.92	81.4996
785.403	84.7424
785.885	48.0125
786.367	25.9418
786.849	33.9816
787.331	45.7117
787.813	56.0843
788.295	62.8432
788.778	61.3394
789.26	54.2159
789.742	52.2239
790.224	64.1676
790.706	73.7026
791.188	57.8413
791.67	30.3516
792.152	17.0846
792.634	19.6317
793.117	32.3472
793.599	53.3866
794.081	70.7831
794.563	58.9751
795.045	17.497
795.527	3.74731
796.009	25.3281
796.491	46.0461
796.973	54.7622
797.456	55.3972
797.938	51.0471
798.42	41.3024
798.902	31.3803
799.384	22.0267
799.866	11.5493
800.348	6.96747
800.83	20.9323
801.312	14.8419
801.795	3.34692
802.277	8.78351
802.759	12.331
803.241	29.426
803.723	19.2844
804.205	1.30066
804.687	14.256
805.169	20.9606
805.652	31.3132
806.134	48.6169
806.616	63.2157
807.098	59.6687
807.58	45.6119
808.062	51.0148
808.544	20.8917
809.026	59.4244
809.508	81.2737
809.991	87.3438
810.473	30.4008
810.955	54.8057
811.437	46.5975
811.919	37.0449
812.401	72.8756
812.883	25.0524
813.365	60.1433
813.847	56.0618
814.33	57.7641
814.812	60.4598
815.294	61.7789
815.776	61.4916
816.258	61.8101
816.74	61.8777
817.222	64.3017
817.705	65.4165
818.187	57.6956
818.669	42.3148
819.151	32.2709
819.633	34.109
820.115	40.5065
820.597	45.3229
821.079	49.1472
821.561	50.6586
822.044	50.628
822.526	54.263
823.008	64.996
823.49	78.9523
823.972	92.0335
824.454	103.917
824.936	102.188
825.418	84.1064
825.9	66.5111
826.383	54.9279
826.865	50.4001
827.347	56.0962
827.829	71.7047
828.311	79.3752
828.793	72.7476
829.275	71.0132
829.757	88.4311
830.239	100.959
830.722	86.4609
831.204	55.0993
831.686	35.5431
832.168	33.9712
832.65	39.639
833.132	61.3069
833.614	77.5191
834.096	65.4232
834.578	39.6796
835.061	27.7378
835.543	36.082
836.025	47.3826
836.507	47.9496
836.989	45.8508
837.471	54.3521
837.953	67.9675
838.435	71.5693
838.917	63.7914
839.4	57.4958
839.882	61.9338
840.364	72.3632
840.846	81.237
841.328	88.0795
841.81	83.2843
842.292	65.5154
842.774	52.051
843.257	52.5451
843.739	57.4368
844.221	51.1924
844.703	32.4593
845.185	25.0773
845.667	36.9038
846.149	45.1514
846.631	40.0264
847.114	35.1312
847.596	42.1744
848.078	57.5371
848.56	67.1127
849.042	67.6453
849.524	66.3892
850.006	62.8462
850.488	59.7453
850.971	58.2832
851.453	58.3588
851.935	60.9019
852.417	65.8503
852.899	68.3319
853.381	63.6326
853.863	58.5503
854.345	57.5023
854.827	58.5098
855.31	57.1874
855.792	54.2054
856.274	56.1957
856.756	67.9614
857.238	81.3226
857.72	85.1633
858.202	80.0436
858.684	66.9421
859.166	48.5458
859.649	39.7132
860.131	45.3869
860.613	57.6036
861.095	71.181
861.577	85.6913
862.059	82.3898
862.541	55.8049
863.023	35.4318
863.505	26.8114
863.988	25.4054
864.47	30.5055
864.952	38.8863
865.434	40.4385
865.916	30.0538
866.398	25.2265
866.88	32.308
867.362	38.6768
867.844	41.3388
868.327	40.8935
868.809	36.1113
869.291	27.6587
869.773	26.0346
870.255	47.9616
870.737	57.8369
871.219	28.632
871.701	3.33118
872.184	3.14197
872.666	18.6769
873.148	31.3607
873.63	24.189
874.112	19.0623
874.594	43.8492
875.076	66.699
875.558	42.4062
876.041	5.39636
876.523	22.719
877.005	1.94867
877.487	20.6823
877.969	18.5582
878.451	8.19556
878.933	17.7178
879.415	40.9636
879.898	61.4214
880.38	76.2496
880.862	73.0448
881.344	45.1478
881.826	15.4655
882.308	17.7025
882.79	46.2886
883.272	54.1331
883.754	38.0751
884.237	33.1888
884.719	50.6085
885.201	66.356
885.683	60.2646
886.165	40.9965
886.647	36.859
887.129	58.204
887.611	62.158
888.093	35.9995
888.576	13.8109
889.058	9.78918
889.54	14.3207
890.022	17.4091
890.504	19.1595
890.986	20.9399
891.468	17.4289
891.95	21.4499
892.432	44.5431
892.915	66.0905
893.397	74.2163
893.879	71.2741
894.361	60.0925
894.843	39.5521
895.325	27.4943
895.807	39.7923
896.289	52.1635
896.771	47.8355
897.254	37.0095
897.736	30.6367
898.218	30.3843
898.7	35.3364
899.182	47.0953
899.664	56.8603
900.146	54.4369
900.628	47.908
901.111	47.6467
901.593	52.369
902.075	60.1323
902.557	68.7142
903.039	66.7133
903.521	38.087
904.003	2.13544
904.485	8.85199
904.968	1.47699
905.45	28.8901
905.932	69.3016
906.414	98.8487
906.896	105.167
907.378	95.7913
907.86	76.7837
908.342	51.1738
908.825	42.2073
909.307	50.024
909.789	55.8126
910.271	55.1165
910.753	50.2733
911.235	42.4999
911.717	32.2673
912.199	22.7438
912.681	13.7664
913.164	12.4768
913.646	23.2292
914.128	28.3317
914.61	17.3876
915.092	4.02679
915.574	5.57318
916.056	20.7762
916.538	27.9288
917.02	22.9565
917.503	17.5388
917.985	7.08954
918.467	3.28345
918.949	19.8373
919.431	43.7336
919.913	53.0722
920.395	45.7366
920.877	36.8508
921.359	24.3666
921.842	14.3866
922.324	7.04572
922.806	4.12207
923.288	8.5896
923.77	18.4176
924.252	29.2042
924.734	42.2448
925.216	48.7009
925.698	39.3504
926.181	30.0154
926.663	31.2831
927.145	36.5805
927.627	37.6792
928.109	34.0924
928.591	29.4106
929.073	22.1825
929.555	20.1299
930.038	33.4915
930.52	50.679
931.002	66.7738
931.484	75.0754
931.966	57.578
932.448	14.259
932.93	18.6604
933.412	13.5292
933.894	8.67395
934.377	34.9067
934.859	60.4764
935.341	72.4619
935.823	73.0407
936.305	68.282
936.787	60.973
937.269	54.6954
937.752	53.3977
938.234	55.8881
938.716	63.8157
939.198	72.4373
939.68	64.952
940.162	42.8104
940.644	35.2538
941.126	60.9589
941.608	93.1986
942.091	83.448
942.573	47.3272
943.055	48.8899
943.537	82.6834
944.019	92.8345
944.501	65.2833
944.983	36.6146
945.465	37.1654
945.947	53.2579
946.43	52.4466
946.912	36.1185
947.394	22.5947
947.876	12.7622
948.358	10.0592
948.84	16.2994
949.322	26.6814
949.804	37.4678
950.286	46.8227
950.769	44.34
951.251	27.8959
951.733	21.4327
952.215	29.774
952.697	35.104
953.179	28.5146
953.661	16.6768
954.143	9.36676
954.625	6.53705
955.108	8.71094
955.59	18.5561
956.072	22.8212
956.554	16.0682
957.036	12.8595
957.518	24.8816
958	41.5384
958.482	42.1509
958.965	24.1672
959.447	14.845
959.929	19.2925
960.411	20.996
960.893	14.1247
961.375	7.81842
961.857	9.46313
962.339	15.2202
962.821	16.3379
963.304	8.35864
963.786	10.8419
964.268	35.1099
964.75	52.3356
965.232	49.9631
965.714	43.6393
966.196	50.3493
966.679	63.5251
967.161	57.9395
967.643	19.6017
968.125	4.60229
968.607	14.9067
969.089	9.4931
969.571	29.9056
970.053	71.5442
970.535	84.9238
971.018	73.5553
971.5	58.3561
971.982	29.1437
972.464	18.9229
972.946	50.2773
973.428	79.1265
973.91	88.1421
974.392	83.6463
974.875	69.2322
975.357	47.2198
975.839	30.6998
976.321	17.3641
976.803	16.8815
977.285	48.4983
977.767	74.2146
978.249	64.0445
978.731	40.5798
979.214	35.7246
979.696	50.9929
980.178	63.413
980.66	68.8445
981.142	68.6685
981.624	59.5138
982.106	48.6796
982.588	39.2859
983.07	32.3717
983.553	29.7643
984.035	31.4614
984.517	32.8528
984.999	31.4188
985.481	30.9233
985.963	36.0452
986.445	39.4446
986.927	29.6205
987.409	16.4265
987.892	21.1635
988.374	47.2019
988.856	63.4059
989.338	52.5603
989.82	36.9253
990.302	24.4779
990.784	11.9094
991.266	6.31348
991.748	22.8606
992.231	21.7656
992.713	0.736206
993.195	17.8198
993.677	16.6092
994.159	9.95483
994.641	0.113586
995.123	8.90222
995.606	14.6046
996.088	14.9486
996.57	3.56244
997.052	21.6477
997.534	42.8047
998.016	54.0124
998.498	56.6316
998.98	42.3845
999.462	27.1989
999.945	28.7119
1000.43	41.8105
1000.91	53.7538
1001.39	61.8126
1001.87	58.8402
1002.36	26.7104
1002.84	0.507141
1003.32	2.73193
1003.8	18.4681
1004.28	37.5679
1004.77	55.8026
1005.25	68.516
1005.73	74.5851
1006.21	74.5577
1006.69	62.8189
1007.18	52.1969
1007.66	53.5126
1008.14	56.7808
1008.62	51.9076
1009.11	40.1144
1009.59	23.7759
1010.07	1.63782
1010.55	4.75555
1011.03	31.0296
1011.51	64.5674
1012	73.1056
1012.48	66.2284
1012.96	43.0367
1013.44	15.2191
1013.93	10.2176
1014.41	37.8674
1014.89	62.2776
1015.37	66.1034
1015.85	67.0483
1016.34	76.926
1016.82	85.6612
1017.3	79.2931
1017.78	64.3675
1018.26	58.0206
1018.75	64.6122
1019.23	75.6502
1019.71	99.1869
1020.19	112.675
1020.68	89.6496
1021.16	65.8898
1021.64	88.4341
1022.12	132.385
1022.6	129.21
1023.09	57.8146
1023.57	11.2471
1024.05	31.0103
1024.53	61.6163
1025.02	100.5
1025.5	123.976
1025.98	99.6407
1026.46	48.6691
1026.94	18.6014
1027.42	18.5222
1027.91	21.1977
1028.39	23.746
1028.87	24.0091
1029.35	17.7721
1029.84	12.43
1030.32	13.4231
1030.8	19.2349
1031.28	27.5488
1031.76	38.7694
1032.25	45.9426
1032.73	43.9528
1033.21	43.5446
1033.69	54.1093
1034.17	59.79
1034.66	39.7297
1035.14	12.4704
1035.62	15.8549
1036.1	55.8261
1036.59	74.2182
1037.07	41.989
1037.55	25.9125
1038.03	57.3509
1038.51	82.3453
1039	57.2256
1039.48	16.2986
1039.96	16.3835
1040.44	60.1071
1040.92	76.8855
1041.41	41.7606
1041.89	21.1234
1042.37	28.6978
1042.85	40.34
1043.34	46.6067
1043.82	49.3392
1044.3	50.2534
1044.78	49.5092
1045.26	50.2837
1045.75	54.357
1046.23	55.4459
1046.71	53.1245
1047.19	47.2839
1047.67	35.086
1048.16	23.946
1048.64	22.2558
1049.12	28.7101
1049.6	37.4407
1050.09	50.3094
1050.57	66.996
1051.05	91.7142
1051.53	96.9128
1052.01	64.8545
1052.49	32.6773
1052.98	38.6639
1053.46	69.3983
1053.94	75.9528
1054.42	56.5258
1054.91	48.7997
1055.39	54.8638
1055.87	59.3987
1056.35	57.5516
1056.83	55.7275
1057.32	59.6873
1057.8	65.362
1058.28	63.0046
1058.76	53.3563
1059.24	44.5327
1059.73	36.6993
1060.21	31.2508
1060.69	28.4802
1061.17	29.9124
1061.66	36.6786
1062.14	46.7808
1062.62	61.7911
1063.1	76.6242
1063.58	69.0113
1064.07	44.5804
1064.55	24.8444
1065.03	14.1815
1065.51	15.4644
1065.99	30.3183
1066.48	43.1801
1066.96	28.0619
1067.44	5.31891
1067.92	21.7778
1068.4	55.3992
1068.89	54.3105
1069.37	22.7537
1069.85	0.908142
1070.33	2.93097
1070.82	8.56097
1071.3	0.798035
1071.78	11.3107
1072.26	8.67401
1072.74	2.10327
1073.23	20.5514
1073.71	39.3405
1074.19	40.9266
1074.67	24.1248
1075.15	15.1279
1075.64	32.3909
1076.12	52.7848
1076.6	64.7948
1077.08	70.8038
1077.57	74.7728
1078.05	72.9247
1078.53	48.0743
1079.01	8.43341
1079.49	5.85638
1079.98	80.5663
1080.46	129.211
1080.94	95.394
1081.42	54.9037
1081.9	42.6643
1082.39	44.5042
1082.87	49.852
1083.35	55.451
1083.83	53.2448
1084.32	38.3653
1084.8	31.0017
1085.28	42.7158
1085.76	48.1668
1086.24	28.5576
1086.72	15.7659
1087.21	39.9061
1087.69	78.7778
1088.17	89.2138
1088.65	68.2498
1089.14	56.3154
1089.62	57.0519
1090.1	56.7043
1090.58	51.6584
1091.07	50.9954
1091.55	61.8569
1092.03	73.2096
1092.51	69.0529
1092.99	53.2539
1093.47	50.7523
1093.96	62.7966
1094.44	71.2155
1094.92	74.7724
1095.4	73.3062
1095.89	66.7519
1096.37	54.1714
1096.85	33.47
1097.33	10.0964
1097.81	7.28577
1098.3	16.976
1098.78	6.99646
1099.26	19.1733
1099.74	44.8738
1100.22	65.1412
1100.71	75.3025
1101.19	72.353
1101.67	61.104
1102.15	38.5527
1102.63	17.882
1103.12	28.3783
1103.6	52.6873
1104.08	54.6103
1104.56	37.5062
1105.05	28.509
1105.53	37.0052
1106.01	43.9513
1106.49	36.8754
1106.97	24.8301
1107.46	10.4808
1107.94	2.10193
1108.42	11.7151
1108.9	15.306
1109.38	5.01318
1109.87	17.7866
1110.35	35.2056
1110.83	40.4379
1111.31	42.4819
1111.8	42.8658
1112.28	41.8096
1112.76	34.8407
1113.24	30.1577
1113.72	38.8134
1114.21	56.8787
1114.69	70.6836
1115.17	84.0481
1115.65	77.1915
1116.13	29.6343
1116.62	3.20367
1117.1	19.7604
1117.58	41.4367
1118.06	46.8826
1118.55	42.4704
1119.03	37.474
1119.51	32.0831
1119.99	28.8379
1120.47	27.9863
1120.96	25.4323
1121.44	20.1788
1121.92	24.355
1122.4	43.7648
1122.88	55.5751
1123.37	35.135
1123.85	1.82648
1124.33	0.36615
1124.81	21.723
1125.3	39.7246
1125.78	49.7585
1126.26	38.8434
1126.74	10.3476
1127.22	1.36523
1127.7	23.1343
1128.19	50.9505
1128.67	48.9406
1129.15	33.4931
1129.63	15.45
1130.12	1.36145
1130.6	1.47772
1131.08	11.3803
1131.56	20.6637
1132.04	26.6054
1132.53	30.0894
1133.01	24.5336
1133.49	27.1841
1133.97	63.2329
1134.45	89.2279
1134.94	64.1211
1135.42	23.2236
1135.9	8.33179
1136.38	18.1113
1136.87	32.4072
1137.35	58.8397
1137.83	65.5896
1138.31	39.6696
1138.79	17.7194
1139.28	8.0014
1139.76	3.23651
1140.24	1.63501
1140.72	3.7796
1141.2	2.82635
1141.69	17.2338
1142.17	29.6048
1142.65	40.3197
1143.13	38.1613
1143.62	21.8279
1144.1	6.42383
1144.58	2.5379
1145.06	2.20569
1145.54	30.9434
1146.03	63.0555
1146.51	55.5874
1146.99	26.6321
1147.47	19.7514
1147.95	27.8123
1148.44	25.8964
1148.92	12.802
1149.4	4.7132
1149.88	8.67291
1150.37	15.0567
1150.85	15.5666
1151.33	17.0298
1151.81	27.4917
1152.29	38.8832
1152.78	44.929
1153.26	45.1887
1153.74	35.6271
1154.22	18.3253
1154.7	14.608
1155.19	41.5282
1155.67	58.0909
1156.15	54.6761
1156.63	46.7058
1157.12	34.3718
1157.6	23.4131
1158.08	17.9708
1158.56	17.7778
1159.04	23.3024
1159.53	35.4175
1160.01	42.0188
1160.49	41.4658
1160.97	45.2582
1161.45	56.8414
[truncated: 207 more rows]

## Sheet: ApatiteStandard
Column1	Column2
110.697	0
111.18	1.06915
111.662	0.008301
112.144	1.49091
112.626	3.63367
113.108	4.81811
113.59	4.6878
114.072	3.98657
114.554	2.72797
115.036	0.959839
115.519	0.093689
116.001	0.408752
116.483	1.30884
116.965	1.98022
117.447	2.31873
117.929	2.45172
118.411	2.48358
118.893	2.25183
119.376	2.32104
119.858	2.95068
120.34	3.73822
120.822	4.40106
121.304	4.82074
121.786	5.02942
122.268	5.1264
122.75	5.1933
123.232	5.02667
123.715	4.27814
124.197	3.34058
124.679	2.83044
125.161	3.15088
125.643	4.16907
126.125	4.77051
126.607	4.59277
127.089	4.34699
127.572	4.30713
128.054	4.44977
128.536	4.57007
129.018	4.37512
129.5	4.03711
129.982	4.36755
130.464	6.383
130.946	8.56635
131.428	9.04132
131.911	7.38471
132.393	5.71405
132.875	6.10712
133.357	7.5639
133.839	8.94354
134.321	9.61633
134.803	8.90503
135.285	8.47467
135.767	8.57294
136.25	8.85321
136.732	9.42041
137.214	9.56574
137.696	9.31555
138.178	8.14551
138.66	5.8858
139.142	3.4039
139.624	4.61261
140.107	5.20395
140.589	5.21108
141.071	2.88425
141.553	3.57124
142.035	3.05039
142.517	2.48005
142.999	3.59122
143.481	1.60386
143.963	2.68837
144.446	2.54664
144.928	2.96609
145.41	2.17031
145.892	2.3432
146.374	2.11163
146.856	2.02948
147.338	2.31928
147.82	2.71155
148.303	2.854
148.785	2.60223
149.267	2.12763
149.749	1.74768
150.231	1.4314
150.713	1.23254
151.195	1.2384
151.677	1.39368
152.159	1.54773
152.642	1.7254
153.124	1.77734
153.606	1.42889
154.088	0.496887
154.57	0.265015
155.052	0.113708
155.534	0.0950376
156.016	0.548039
156.499	0.917847
156.981	1.2727
157.463	2.29028
157.945	1.6463
158.427	2.21099
158.909	1.06891
159.391	2.16962
159.873	2.65503
160.355	2.09143
160.838	1.10187
161.32	0.098938
161.802	0.765747
162.284	1.35895
162.766	1.2207
163.248	1.83255
163.73	1.85492
164.212	2.2937
164.694	2.20386
165.177	2.02124
165.659	1.9931
166.141	2.07703
166.623	1.96905
167.105	1.18988
167.587	0.742432
168.069	1.08533
168.551	1.9411
169.034	2.68152
169.516	2.93176
169.998	2.73767
170.48	2.48413
170.962	1.93597
171.444	1.55926
171.926	1.80652
172.408	2.51849
172.89	2.92059
173.373	2.2478
173.855	0.698975
174.337	0.005859
174.819	0.716187
175.301	1.88458
175.783	2.8847
176.265	3.69824
176.747	4.21814
177.23	4.09943
177.712	3.61395
178.194	3.44128
178.676	4.24737
179.158	5.25726
179.64	5.12073
180.122	3.40692
180.604	1.80872
181.086	1.4245
181.569	1.85278
182.051	2.5669
182.533	3.57709
183.015	4.67255
183.497	5.13367
183.979	4.5495
184.461	3.92938
184.943	3.76502
185.425	3.87549
185.908	3.9256
186.39	3.61133
186.872	3.00226
187.354	2.84711
187.836	3.6654
188.318	4.42487
188.8	4.73889
189.282	4.76306
189.764	4.86829
190.247	5.39923
190.729	6.39294
191.211	6.92413
191.693	6.54938
192.175	6.1413
192.657	5.95508
193.139	5.97797
193.621	6.09558
194.104	6.22638
194.586	6.39093
195.068	6.37579
195.55	5.80176
196.032	5.42291
196.514	5.93164
196.996	7.11279
197.478	7.95428
197.96	7.39081
198.443	5.06189
198.925	3.9397
199.407	4.87372
199.889	6.24817
200.371	7.01239
200.853	7.08221
201.335	6.90125
201.817	6.9024
202.299	7.09753
202.782	6.89453
203.264	5.65112
203.746	4.37555
204.228	4.16565
204.71	5.17682
205.192	6.4176
205.674	7.02673
206.156	7.10657
206.639	7.08758
207.121	6.97485
207.603	6.84106
208.085	6.82184
208.567	6.97174
209.049	7.07098
209.531	6.92822
210.013	6.60834
210.495	6.211
210.978	5.63117
211.46	5.01422
211.942	4.72424
212.424	4.88251
212.906	5.09485
213.388	4.92236
213.87	4.59106
214.352	4.57208
214.835	5.3476
215.317	6.55426
215.799	6.76086
216.281	5.23004
216.763	3.86078
217.245	3.73718
217.727	4.29858
218.209	4.52771
218.691	3.64911
219.174	1.91974
219.656	0.874512
220.138	0.841003
220.62	1.26172
221.102	2.24884
221.584	1.46173
222.066	3.94104
222.548	5.31592
223.03	5.646
223.513	1.79968
223.995	3.34668
224.477	2.73285
224.959	2.0307
225.441	4.33777
225.923	1.10046
226.405	3.36023
226.887	3.42609
227.37	4.49658
227.852	3.3927
228.334	2.96075
228.816	4.70441
229.298	5.24377
229.78	3.89075
230.262	5.02667
230.744	1.71631
231.226	2.30829
231.709	4.58386
232.191	3.34021
232.673	4.51739
233.155	4.77368
233.637	0.843506
234.119	4.19592
234.601	4.40008
235.083	1.37097
235.566	4.47522
236.048	1.89252
236.53	1.34021
237.012	2.3158
237.494	1.69928
237.976	3.5943
238.458	3.07135
238.94	2.33258
239.423	2.53699
239.905	1.87195
240.387	2.56012
240.869	1.66431
241.351	2.45239
241.833	3.62237
242.315	1.87073
242.797	3.21258
243.279	0.242249
243.762	0.317139
244.244	0.444519
244.726	3.13806
245.208	0.292053
245.69	0.157227
246.172	2.25867
246.654	2.04907
247.136	1.01984
247.619	0.543091
248.101	1.06555
248.583	2.27033
249.065	2.96686
249.547	2.56097
250.029	1.68341
250.511	1.29639
250.993	1.44623
251.475	1.69952
251.958	1.94244
252.44	2.12347
252.922	1.96442
253.404	1.1601
253.886	0.282349
254.368	0.014893
254.85	0.260986
255.332	1.18585
255.815	1.05109
256.297	2.33209
256.779	2.70837
257.261	0.529968
257.743	0.899963
258.225	0.459473
258.707	0.057434
259.189	0.497431
259.671	0.680664
260.154	1.36658
260.636	1.51465
261.118	2.53235
261.6	1.66797
262.082	1.38538
262.564	2.98602
263.046	3.54437
263.528	2.46442
264.01	3.53912
264.493	0.765137
264.975	1.36908
265.457	3.43054
265.939	2.44684
266.421	3.55737
266.903	3.87073
267.385	0.559998
267.867	3.5777
268.349	3.84558
268.832	1.31488
269.314	4.09338
269.796	1.94916
270.278	1.5625
270.76	2.49866
271.242	2.0564
271.724	3.78809
272.207	3.42609
272.689	2.87763
273.171	3.14648
273.653	2.66309
274.135	3.35101
274.617	2.66797
275.099	3.44269
275.581	4.6297
276.063	3.20581
276.546	4.46002
277.028	4.31787
277.51	2.13873
277.992	4.51709
278.474	5.03162
278.956	4.86499
279.438	4.3512
279.92	4.20618
280.402	4.97064
280.885	4.90472
281.367	2.65741
281.849	0.399231
282.331	0.051758
282.813	1.96643
283.295	4.68097
283.777	6.01917
284.259	5.42102
284.741	4.78082
285.224	3.85541
285.706	3.12225
286.188	2.90442
286.67	3.21619
287.152	3.836
287.634	4.61517
288.116	5.75049
288.598	6.21442
289.08	5.28809
289.563	4.38415
290.045	4.13599
290.527	4.56012
291.009	5.3161
291.491	6.13965
291.973	7.0246
292.455	7.40277
292.938	7.02466
293.42	6.5354
293.902	5.98328
294.384	5.47382
294.866	5.22418
295.348	5.49127
295.83	6.12036
296.312	6.28644
296.794	5.71515
297.276	5.20667
297.759	5.1131
298.241	5.14233
298.723	4.77936
299.205	3.71796
299.687	2.2077
300.169	1.21216
300.651	0.927673
301.134	1.008
301.616	1.77319
302.098	2.77252
302.58	3.46692
303.062	3.63794
303.544	3.50964
304.026	3.57532
304.508	4.28461
304.99	4.54755
305.473	3.73022
305.955	2.77033
306.437	2.68115
306.919	3.65942
307.401	4.85907
307.883	5.02862
308.365	3.49487
308.847	2.65454
309.329	2.9743
309.812	3.47705
310.294	3.49731
310.776	3.08917
311.258	2.73328
311.74	3.05603
312.222	4.28406
312.704	4.68384
313.186	3.66913
313.668	2.53565
314.151	1.53705
314.633	0.787109
315.115	0.398499
315.597	0.491302
316.079	1.03735
316.561	1.74921
317.043	3.34027
317.525	4.30048
318.007	3.91754
318.49	2.79535
318.972	1.80328
319.454	1.37824
319.936	1.46185
320.418	1.88556
320.9	3.34372
321.382	4.24924
321.865	4.20828
322.347	3.73868
322.829	3.39401
323.311	3.34671
323.793	3.29056
324.275	2.62424
324.757	0.511658
325.239	0.479828
325.721	0.236023
326.204	1.25977
326.686	2.01721
327.168	2.34949
327.65	2.34283
328.132	2.02924
328.614	1.26962
329.096	0.906067
329.578	0.866119
330.06	1.22324
330.543	2.65991
331.025	4.5957
331.507	5.50247
331.989	4.00845
332.471	0.362701
332.953	1.35831
333.435	1.20267
333.917	3.21335
334.399	3.5025
334.882	2.73639
335.364	1.83969
335.846	1.2727
336.328	1.02274
336.81	1.10281
337.292	1.94812
337.774	2.47488
338.256	2.3468
338.739	2.0387
339.221	2.03616
339.703	2.44763
340.185	2.93683
340.667	2.93713
341.149	2.103
341.631	1.65039
342.113	2.0184
342.596	2.35559
343.078	2.02011
343.56	1.12286
344.042	0.341034
344.524	0.378448
345.006	1.30072
345.488	1.88361
345.97	2.0524
346.452	1.91357
346.935	1.29166
347.417	0.39386
347.899	0.498871
348.381	1.26294
348.863	1.80612
349.345	1.67194
349.827	1.99727
350.309	0.919769
350.791	1.72235
351.274	2.0466
351.756	1.46365
352.238	0.155518
352.72	1.85791
353.202	1.8016
353.684	0.863831
354.166	2.68143
354.648	2.79718
355.13	2.34994
355.613	1.7222
356.095	1.07593
356.577	0.682587
357.059	1.04834
357.541	2.23328
358.023	2.63446
358.505	1.52219
358.987	0.401672
359.469	0.127563
359.952	0.187805
360.434	0.048279
360.916	0.237122
361.398	0.544586
361.88	0.374298
362.362	0.684998
362.844	1.29489
363.327	0.518768
363.809	0.702637
364.291	1.30627
364.773	0.892395
365.255	0.260742
365.737	0.703003
366.219	2.42444
366.701	3.28476
367.183	1.8999
367.666	0.187012
368.148	0.487091
368.63	0.072845
369.112	0.795624
369.594	1.98941
370.076	3.34567
370.558	3.99499
371.04	3.60055
371.522	2.96664
372.005	2.5538
372.487	2.33057
372.969	2.24841
373.451	2.49329
373.933	2.74643
374.415	2.32971
374.897	1.11905
375.379	0.31546
375.861	0.814392
376.344	1.96439
376.826	2.82953
377.308	3.38296
377.79	3.49841
378.272	2.6738
378.754	1.2074
379.236	0.465729
379.718	0.991241
380.201	2.10638
380.683	3.30212
381.165	4.62488
381.647	4.87195
382.129	2.28909
382.611	1.04279
383.093	1.86121
383.575	0.354858
384.058	2.99802
384.54	4.07602
385.022	3.71158
385.504	3.4942
385.986	3.66141
386.468	3.81448
386.95	3.5936
387.432	3.12866
387.914	2.87933
388.397	3.0896
388.879	3.61163
389.361	4.07797
389.843	4.4928
390.325	4.86289
390.807	5.17096
391.289	5.48877
391.771	5.52948
392.253	5.26382
392.736	5.04163
393.218	5.35831
393.7	6.45013
394.182	6.7973
394.664	5.59796
395.146	4.44
395.628	4.22308
396.11	4.82922
396.592	5.77078
397.075	6.79193
397.557	7.80609
398.039	8.33667
398.521	7.31158
399.003	7.10092
399.485	9.0303
399.967	11.4228
400.45	12.273
400.932	11.0107
401.414	8.83957
401.896	7.50256
402.378	6.97458
402.86	7.4397
403.342	10.0831
403.824	12.5256
404.306	13.2764
404.788	12.6863
405.271	12.1179
405.753	12.5781
406.235	13.9329
406.717	15.1881
407.199	16.4901
407.681	17.6175
408.163	18.2644
408.645	18.7218
409.128	19.3712
409.61	20.3536
410.092	21.4093
410.574	22.193
411.056	22.8591
411.538	23.173
412.02	22.1672
412.502	21.3454
412.985	21.5597
413.467	22.7726
413.949	24.4985
414.431	27.0298
414.913	29.878
415.395	30.8076
415.877	28.8132
416.359	27.3715
416.841	29.3069
417.324	32.6796
417.806	34.8996
418.288	35.0198
418.77	34.5106
419.252	34.6945
419.734	35.5119
420.216	36.4198
420.698	37.3428
421.18	38.3242
421.663	39.3792
422.145	40.4816
422.627	41.3256
423.109	41.5607
423.591	41.5812
424.073	41.9889
424.555	42.8503
425.037	43.6639
425.519	44.0246
426.002	43.9487
426.484	43.9689
426.966	43.9708
427.448	44.154
427.93	45.0079
428.412	46.0885
428.894	46.3959
429.377	45.5208
429.859	43.9595
430.341	42.5219
430.823	41.0708
431.305	40.1362
431.787	40.2797
432.269	40.5338
432.751	40.189
433.233	39.2419
433.716	38.0716
434.198	36.9511
434.68	35.8889
435.162	34.9874
435.644	34.6632
436.126	34.0048
436.608	32.6715
437.09	31.0029
437.572	29.2239
438.055	27.4935
438.537	26.1435
439.019	25.7086
439.501	26.389
439.983	27.0478
440.465	27.8095
440.947	28.388
441.429	28.8133
441.911	28.972
442.394	28.9308
442.876	28.7671
443.358	28.4182
443.84	27.5805
444.322	25.9598
444.804	24.6471
445.286	24.1774
445.768	24.046
446.25	23.9031
446.733	23.7131
447.215	23.4141
447.697	22.9697
448.179	22.3786
448.661	21.6097
449.143	20.6425
449.625	19.5278
450.108	17.8195
450.59	15.8929
451.072	15.0989
451.554	17.0868
452.036	19.436
452.518	19.4691
453	17.5085
453.482	15.9416
453.964	16.055
454.447	16.9835
454.929	16.5618
455.411	14.2866
455.893	12.3282
456.375	11.226
456.857	10.6956
457.339	10.6667
457.821	11.0487
458.303	11.1914
458.786	10.266
459.268	8.20581
459.75	7.58695
460.232	10.4337
460.714	12.2454
461.196	10.6625
461.678	7.54535
462.16	5.68192
462.642	6.10529
463.125	7.6915
463.607	8.58255
464.089	8.66443
464.571	8.47385
465.053	7.46845
465.535	6.60941
466.017	6.64618
466.5	7.22543
466.982	7.30316
467.464	5.99771
467.946	3.94571
468.428	3.35349
468.91	4.94217
469.392	6.1131
469.874	5.86505
470.356	5.03384
470.839	4.07004
471.321	3.06094
471.803	2.38431
472.285	2.56589
472.767	3.35361
473.249	3.81247
473.731	3.85187
474.213	3.56397
474.695	2.51477
475.178	1.2049
475.66	0.924377
476.142	2.6886
476.624	4.53329
477.106	4.95923
477.588	4.41998
478.07	3.96399
478.552	4.00674
479.034	4.23343
479.517	4.09976
479.999	3.46005
480.481	3.17081
480.963	3.71338
481.445	4.26138
481.927	4.11728
482.409	3.45255
482.891	2.94855
483.373	3.03113
483.856	3.51709
484.338	3.74347
484.82	3.38809
485.302	3.22659
485.784	3.61359
486.266	3.96414
486.748	3.69028
487.231	2.82333
487.713	1.9505
488.195	1.61465
488.677	1.77951
489.159	1.85852
489.641	1.76181
490.123	1.71964
490.605	1.80496
491.087	1.97406
491.57	2.22577
492.052	2.57452
492.534	2.83514
493.016	2.84049
493.498	2.59515
493.98	2.10474
494.462	1.28372
494.944	0.387665
495.426	0.578125
495.909	1.48022
496.391	1.83633
496.873	1.15686
497.355	0.219757
497.837	0.437683
498.319	0.825897
498.801	0.927002
499.283	0.676453
499.765	0.29187
500.248	0.149658
500.73	0.368103
501.212	0.387177
501.694	0.136017
502.176	0.619659
502.658	0.667511
503.14	0.307068
503.622	0.335266
504.104	1.2388
504.587	2.19183
505.069	2.39587
505.551	1.04919
506.033	0.210541
506.515	0.358154
506.997	0.740204
507.479	0.781494
507.962	0.469055
508.444	0.173981
508.926	0.227814
509.408	0.567322
509.89	0.843872
510.372	1.15009
510.854	1.186
511.336	1.09415
511.818	0.378906
512.301	0.688843
512.783	0.309601
513.265	0.221802
513.747	0.657532
514.229	0.928741
514.711	0.707855
515.193	0.172241
515.675	0.936981
516.158	0.862183
516.64	0.152252
517.122	0.171478
517.604	0.3591
518.086	0.773102
518.568	0.482056
519.05	0.179077
519.532	0.698151
520.014	0.927795
520.496	0.852905
520.979	1.10578
521.461	0.742249
521.943	1.06006
522.425	1.27269
522.907	0.966156
523.389	2.04651
523.871	2.88028
524.354	2.99008
524.836	2.19299
525.318	1.09518
525.8	0.712433
526.282	1.16003
526.764	1.76709
527.246	3.01236
527.728	3.83893
528.21	3.39771
528.692	2.17719
529.175	1.31039
529.657	1.36096
530.139	1.85059
530.621	2.32208
531.103	2.75394
531.585	2.67902
532.067	1.70938
532.549	0.577728
533.032	0.371399
533.514	1.02277
533.996	1.23587
534.478	0.044678
534.96	1.20099
535.442	0.539673
535.924	1.4202
536.406	2.72949
536.889	2.39829
537.371	1.20123
537.853	0.800476
538.335	1.88983
538.817	2.38095
539.299	1.77579
539.781	1.06863
540.263	0.8862
540.745	1.09897
541.227	1.17252
541.71	0.740662
542.192	0.096619
542.674	0.087555
543.156	0.982178
543.638	1.64661
544.12	1.51657
544.602	1.3707
545.085	1.80713
545.567	2.73291
546.049	3.52551
546.531	3.81546
547.013	3.79941
547.495	3.80951
547.977	3.84045
548.459	3.62292
548.941	2.91852
549.423	2.06003
549.906	1.67743
550.388	1.80191
550.87	2.02774
551.352	2.49701
551.834	2.8753
552.316	2.69763
552.798	2.1351
553.28	1.85706
553.763	2.29477
554.245	3.14456
554.727	3.4418
555.209	2.46979
555.691	2.23526
556.173	3.22482
556.655	4.46252
557.137	5.51956
557.62	6.29971
558.102	6.74625
558.584	6.77365
559.066	6.52304
559.548	6.15146
560.03	5.51013
560.512	5.63446
560.994	7.61792
561.476	9.75388
561.959	10.2534
562.441	9.20514
562.923	8.10861
563.405	7.17139
563.887	6.69284
564.369	7.32629
564.851	8.84601
565.333	10.0401
565.816	10.3304
566.298	10.0945
566.78	9.99289
567.262	9.84363
567.744	10.3504
568.226	12.2903
568.708	14.1645
569.19	15.1206
569.672	15.2672
570.154	14.9838
570.637	14.4657
571.119	14.0808
571.601	14.7373
572.083	16.8181
572.565	18.4871
573.047	19.4373
573.529	19.9471
574.011	19.9009
574.494	19.6354
574.976	19.919
575.458	21.2586
575.94	22.9441
576.422	24.3349
576.904	25.4435
577.386	26.1636
577.868	23.3774
578.351	26.387
578.833	28.2474
579.315	28.9685
579.797	25.4489
580.279	27.3368
580.761	27.0295
581.243	26.589
581.725	29.1132
582.207	26.0488
582.69	28.4368
583.172	28.5861
583.654	29.6952
584.136	28.5853
584.618	29.522
585.1	28.8309
585.582	28.212
586.064	28.0386
586.546	28.1427
587.029	28.382
587.511	28.7418
587.993	28.8813
588.475	28.2815
588.957	27.1592
589.439	26.3563
589.921	26.0143
590.403	26.0185
590.885	26.8039
591.368	27.811
591.85	26.9259
592.332	22.7886
592.814	19.0158
593.296	17.0423
593.778	16.0451
594.26	15.3132
594.742	14.6823
595.225	14.0602
595.707	13.4037
596.189	12.6802
596.671	11.6536
597.153	9.93701
597.635	8.59647
598.117	7.70898
598.599	7.2449
599.082	7.29526
599.564	7.78381
600.046	8.42972
600.528	9.2796
601.01	10.014
601.492	9.74826
601.974	8.46036
602.456	7.76199
602.938	8.43722
603.42	9.63236
603.903	10.0979
604.385	9.82364
604.867	9.75339
605.349	10.3744
605.831	10.9177
606.313	10.7811
606.795	10.2212
607.278	9.79453
607.76	9.82474
608.242	10.1483
608.724	10.6713
609.206	11.6732
609.688	11.4886
610.17	8.6785
610.652	6.24387
611.134	5.28897
611.616	5.28464
612.099	5.5011
612.581	5.742
613.063	6.01825
613.545	6.59711
614.027	7.22522
614.509	6.83148
614.991	5.13605
615.473	3.75339
615.956	3.96478
616.438	5.18884
616.92	5.34952
617.402	3.89594
617.884	2.55225
618.366	1.43182
618.848	0.727478
619.33	0.850403
619.812	1.61371
620.295	2.31787
620.777	2.50497
621.259	2.32001
621.741	2.16388
622.223	1.99487
622.705	1.98462
623.187	2.44409
623.669	2.80231
624.152	2.72778
624.634	2.34268
625.116	2.02234
625.598	1.93356
626.08	1.9624
626.562	2.16583
627.044	0.976624
627.526	3.18555
628.009	4.43845
628.491	4.78662
628.973	1.51962
629.455	2.92087
629.937	2.45132
630.419	1.90512
630.901	3.96365
631.383	1.22385
631.865	3.24573
632.347	3.40329
632.83	4.40717
633.312	3.51337
633.794	3.2009
634.276	4.77145
634.758	5.29935
635.24	4.189
635.722	5.23285
636.205	2.4277
636.687	3.00015
637.169	5.03018
637.651	4.01492
638.133	5.09393
638.615	5.37656
639.097	2.06146
639.579	5.08917
640.061	5.33218
640.543	2.76752
641.026	3.22662
641.508	2.71176
641.99	2.39188
642.472	2.31451
642.954	1.98297
643.436	0.665253
643.918	0.036896
644.4	0.78476
644.883	2.11697
645.365	2.97162
645.847	3.06201
646.329	2.56622
646.811	0.936584
647.293	1.03278
647.775	0.905396
648.257	1.35956
648.74	1.08255
649.222	0.829456
649.704	1.03369
650.186	0.043488
650.668	0.508942
651.15	0.303467
651.632	1.698
652.114	1.68203
652.596	3.52155
653.079	2.56277
653.561	2.12912
654.043	2.77484
654.525	3.66208
655.007	3.57352
655.489	2.46503
655.971	1.54977
656.453	0.769257
656.936	0.296082
657.418	0.111725
657.9	0.344635
658.382	1.50201
658.864	3.8739
659.346	5.36194
659.828	4.40591
660.31	2.48785
660.792	1.02704
661.274	0.141296
661.757	0.181244
662.239	0.102142
662.721	0.595367
663.203	0.453033
663.685	0.814056
664.167	1.11499
664.649	0.856354
665.131	2.38464
665.614	2.32028
666.096	1.3537
666.578	0.354431
667.06	0.458344
667.542	0.841095
668.024	0.346191
668.506	0.687805
668.988	1.45685
669.471	1.90979
669.953	2.22604
670.435	2.41074
670.917	2.53464
671.399	2.74835
671.881	3.28464
672.363	3.3074
672.845	2.35547
673.327	1.32996
673.81	0.539215
674.292	0.076935
674.774	0.069702
675.256	0.56601
675.738	1.30072
676.22	2.16345
676.702	3.07574
677.184	3.01263
677.667	1.51633
678.149	0.53598
678.631	1.6506
679.113	3.56375
679.595	3.60223
680.077	1.18115
680.559	0.446411
681.041	0.311615
681.523	1.45493
682.006	1.3118
682.488	0.295624
682.97	0.3974
683.452	0.253754
683.934	0.420868
684.416	1.3215
684.898	2.50989
685.38	3.14017
685.862	3.02222
686.345	2.67062
686.827	2.12866
687.309	1.56516
687.791	1.21066
688.273	1.11502
688.755	0.942291
689.237	0.205078
689.719	0.437714
690.202	0.067535
690.684	1.0513
691.166	1.94357
691.648	2.20938
692.13	2.1199
692.612	2.02808
693.094	1.89621
693.576	2.07608
694.058	3.15305
694.541	3.73834
695.023	3.22699
695.505	2.19247
695.987	1.00876
696.469	0.218475
696.951	0.843262
697.433	0.105621
697.915	1.50131
698.398	1.5217
698.88	0.483612
699.362	0.32016
699.844	1.83215
700.326	3.65262
700.808	3.91376
701.29	2.41473
701.772	1.23538
702.255	0.228149
702.737	0.246826
703.219	0.508942
703.701	1.43823
704.183	1.24713
704.665	0.017731
705.147	0.952606
705.629	0.113678
706.111	1.41278
706.593	1.59994
707.076	0.668945
707.558	0.089203
708.04	0.295135
708.522	0.906372
709.004	1.6648
709.486	2.5697
709.968	3.10593
710.45	3.16434
710.933	3.01715
711.415	2.31012
711.897	1.69617
712.379	1.98157
712.861	2.97601
713.343	3.67267
713.825	3.38998
714.307	2.60098
714.789	1.75446
715.272	0.963501
715.754	1.28619
716.236	3.22192
716.718	4.93738
717.2	4.69693
717.682	2.86798
718.164	1.93552
718.646	2.60394
719.129	3.11401
719.611	3.13052
720.093	3.082
720.575	3.40033
721.057	3.90082
721.539	3.95621
722.021	3.25986
722.503	2.38174
722.986	2.00317
723.468	2.03601
723.95	1.93747
724.432	1.61877
724.914	1.34711
725.396	1.39282
725.878	1.63882
726.36	1.47006
726.842	0.294952
727.324	0.201294
727.807	0.762329
728.289	1.77716
728.771	1.85062
729.253	1.46338
729.735	1.64041
730.217	2.7193
730.699	3.86429
731.182	4.15836
731.664	3.74887
732.146	3.22079
732.628	2.57788
733.11	2.07153
733.592	1.7771
734.074	1.7229
734.556	2.0611
735.038	2.98035
735.52	3.2424
736.003	1.87506
736.485	1.02234
736.967	2.02866
737.449	3.5686
737.931	4.13532
738.413	3.52536
738.895	2.92331
739.377	3.29684
739.86	4.07806
740.342	3.91998
740.824	2.87003
741.306	2.25284
741.788	2.50076
742.27	3.0336
742.752	3.13644
743.234	2.75809
743.716	2.63296
744.199	3.22998
744.681	3.41849
745.163	2.72211
745.645	1.84674
746.127	1.28986
746.609	1.04279
747.091	0.831604
747.573	0.449615
748.056	0.293793
748.538	1.11182
749.02	1.6944
749.502	2.76498
749.984	3.35727
750.466	3.49695
750.948	1.83069
751.43	2.49646
751.913	2.22662
752.395	1.91818
752.877	2.91187
753.359	1.50565
753.841	2.47705
754.323	2.47186
754.805	2.86163
755.287	2.36883
755.769	2.17508
756.251	2.92264
756.734	3.14514
757.216	2.547
757.698	3.03058
758.18	1.58957
758.662	1.83704
759.144	2.81302
759.626	2.26523
760.109	2.75885
760.591	2.82812
761.073	1.11258
761.555	2.55237
762.037	2.62826
762.519	1.28735
763.001	2.54388
763.483	1.39291
763.965	1.14136
764.447	1.55081
764.93	1.26758
765.412	2.06488
765.894	1.81879
766.376	1.48236
766.858	1.55624
767.34	1.25327
767.822	1.53574
768.304	1.13229
768.787	1.45728
769.269	1.9473
769.751	1.46008
770.233	1.44711
770.715	0.83786
771.197	0.309937
771.679	0.295197
772.161	0.0265048
772.644	0.427887
773.126	0.05899
773.608	0.266296
774.09	0.451996
774.572	0.504333
775.054	0.422638
775.536	0.211639
776.018	0.205566
776.5	0.81424
776.982	1.3186
777.465	1.40985
777.947	1.1441
778.429	0.698456
778.911	0.049927
779.393	0.293732
779.875	0.407562
780.357	1.29639
780.84	1.77982
781.322	1.88156
781.804	1.71271
782.286	1.07733
782.768	0.463501
783.25	0.35733
783.732	0.825348
784.214	0.210571
784.696	1.14197
785.178	2.34845
785.661	3.08026
786.143	3.34543
786.625	3.04959
787.107	2.30093
787.589	1.36362
788.071	0.221893
788.553	0.128784
789.035	0.997253
789.518	2.62231
790	3.22537
790.482	2.64111
790.964	2.07034
791.446	1.29379
791.928	0.80896
792.41	1.11224
792.892	1.47983
793.375	0.989319
793.857	0.18399
794.339	0.78949
794.821	0.079498
795.303	1.32559
795.785	1.92285
796.267	2.08728
796.749	2.35355
797.231	2.76114
797.714	2.84863
798.196	2.29453
798.678	1.31174
799.16	0.242798
799.642	1.26422
800.124	1.29776
800.606	1.23724
801.088	3.58917
801.571	4.38461
802.053	4.32388
802.535	4.10135
803.017	3.73859
803.499	3.50919
803.981	1.37714
804.463	3.90637
804.945	5.32977
805.427	5.70532
805.909	1.90259
806.392	3.49826
806.874	2.93497
807.356	2.28433
807.838	4.64246
808.32	1.45578
808.802	3.76495
809.284	3.88049
809.766	5.00009
810.249	3.94464
810.731	3.56103
811.213	5.35028
811.695	5.93722
812.177	4.63129
812.659	5.81424
813.141	2.55057
813.623	3.18857
814.106	5.50995
814.588	4.31293
815.07	5.53494
815.552	5.83539
816.034	5.26083
816.516	5.34112
816.998	4.59726
817.48	4.72266
817.962	4.44376
818.445	4.5191
818.927	5.09509
819.409	5.68527
819.891	5.86859
820.373	5.72299
820.855	5.53336
821.337	5.2945
821.819	4.96243
822.302	4.3483
822.784	3.95126
823.266	4.32544
823.748	5.0459
824.23	5.17804
824.712	4.41748
825.194	4.18722
825.676	5.5032
826.158	6.65753
826.641	6.5802
827.123	5.76419
827.605	4.83289
828.087	4.00711
828.569	3.45401
829.051	3.37067
829.533	3.57309
830.015	3.76868
830.497	3.96197
830.98	4.17957
831.462	4.41153
831.944	4.71625
832.426	5.21918
832.908	3.4762
833.39	5.9534
833.872	7.34207
834.354	7.68933
834.837	3.86218
835.319	5.4281
835.801	4.8316
836.283	4.1445
836.765	6.45587
837.247	3.20734
837.729	5.47922
838.211	5.56091
838.693	6.64871
839.176	5.56222
839.658	5.15008
840.14	6.94913
840.622	7.50263
841.104	6.13104
841.586	7.21887
842.068	3.90122
842.55	4.51843
843.033	6.81064
843.515	5.58203
843.997	6.7724
844.479	7.04144
844.961	3.12302
845.443	6.48639
845.925	6.71558
846.407	3.73895
846.889	6.9353
847.372	4.4534
847.854	4.00207
848.336	4.14145
848.818	2.80447
849.3	3.17285
849.782	4.8511
850.264	5.77359
850.746	4.56003
851.229	3.63696
851.711	4.84409
852.193	6.69736
852.675	7.73022
853.157	7.87552
853.639	7.59738
854.121	7.04968
854.603	6.35098
855.085	5.5452
855.568	4.75342
856.05	4.64243
856.532	5.23422
857.014	5.68729
857.496	5.63025
857.978	5.39203
858.46	5.224
858.942	5.08078
859.424	5.4613
859.907	7.01697
860.389	7.96518
860.871	7.86264
861.353	7.50244
861.835	6.95743
862.317	6.45209
862.799	6.37537
863.281	6.84265
863.764	7.41745
864.246	8.03586
864.728	8.57461
865.21	9.10767
865.692	9.4245
866.174	8.98465
866.656	7.81689
867.138	6.75641
867.62	6.48099
868.103	5.98932
868.585	6.4762
869.067	6.09979
869.549	6.20309
870.031	6.91275
870.513	7.29129
870.995	6.63397
871.477	5.71573
871.96	6.25012
872.442	8.73285
872.924	9.96585
873.406	9.3978
873.888	8.45831
874.37	6.9567
874.852	5.72333
875.334	5.81052
875.817	6.939
876.299	7.39502
876.781	6.2066
877.263	5.25217
877.745	5.52396
878.227	6.02866
878.709	5.70001
879.191	4.92502
879.673	4.89407
880.155	5.99933
880.638	6.99884
881.12	6.4256
881.602	5.11847
882.084	4.64862
882.566	4.87112
883.048	5.14957
883.53	5.30972
884.013	5.19394
884.495	4.60712
884.977	3.7717
885.459	3.42893
885.941	3.63635
886.423	4.06909
886.905	4.90332
887.387	5.5058
887.869	5.53922
888.351	5.17728
888.834	4.65277
889.316	3.94019
889.798	3.26245
890.28	2.29517
890.762	1.78674
891.244	2.25088
891.726	2.99951
892.208	3.47729
892.691	3.71256
893.173	4.04205
893.655	4.71967
894.137	5.018
894.619	3.99954
895.101	2.66614
895.583	2.44196
896.065	2.89807
896.548	2.52502
897.03	0.985687
897.512	0.168518
897.994	0.832794
898.476	0.298053
898.958	0.19676
899.44	1.12091
899.922	0.349976
900.404	1.1922
900.886	2.31461
901.369	2.9877
901.851	3.15784
902.333	2.63034
902.815	1.18863
903.297	0.113373
903.779	0.509613
904.261	0.909149
904.744	1.0011
905.226	1.01764
905.708	1.35648
906.19	1.86639
906.672	1.6767
907.154	1.52516
907.636	1.3508
908.118	0.883331
908.6	0.928452
909.082	0.307739
909.565	0.878754
910.047	0.844971
910.529	0.899382
911.011	0.790619
911.493	0.714233
911.975	0.339355
912.457	0.234344
912.939	0.295197
913.422	0.357422
913.904	0.359741
914.386	0.147461
914.868	0.396881
915.35	0.35494
915.832	0.453194
916.314	0.656403
916.796	0.660309
917.278	0.636492
917.761	1.1506
918.243	0.340088
918.725	0.401398
919.207	0.022461
919.689	1.38785
920.171	1.90301
920.653	1.05005
921.135	0.603668
921.617	0.995453
922.1	1.45938
922.582	1.58752
923.064	1.46985
923.546	1.30582
924.028	1.07248
924.51	1.27597
924.992	2.51257
925.474	3.21191
925.957	2.46649
926.439	1.4035
926.921	0.914551
927.403	1.05731
927.885	1.76764
928.367	3.18472
928.849	4.31744
929.331	3.9147
929.813	3.32388
930.296	4.48498
930.778	6.57394
931.26	7.45264
931.742	6.76743
932.224	6.13519
932.706	6.9007
933.188	8.26898
933.67	8.64624
934.153	8.32156
934.635	8.59018
935.117	9.57684
935.599	10.9552
936.081	12.611
936.563	14.2651
937.045	15.5239
937.527	16.4108
938.01	17.2611
938.492	17.9964
938.974	19.021
939.456	20.4069
939.938	22.1206
940.42	24.1683
940.902	26.525
941.384	29.1676
941.866	32.2582
942.348	35.1541
942.831	37.1771
943.313	39.8685
943.795	43.8608
944.277	48.5107
944.759	53.4087
945.241	58.4477
945.723	63.32
946.205	67.5055
946.688	72.5155
947.17	79.5682
947.652	86.9968
948.134	93.7662
948.616	99.9251
949.098	105.379
949.58	110.305
950.062	116.014
950.544	123.999
951.027	132.091
951.509	137.702
951.991	142.237
952.473	148.057
952.955	155.196
953.437	162.717
953.919	170.2
954.401	177.669
954.884	185.121
955.366	192.501
955.848	199.518
956.33	206.309
956.812	214.787
957.294	225.333
957.776	234.86
958.258	241.419
958.74	245.82
959.223	249.811
959.705	253.498
960.187	255.302
960.669	255.698
961.151	252.106
961.633	243.087
962.115	231.238
962.597	218.685
963.08	205.342
963.562	190.784
964.044	174.564
964.526	157.94
965.008	139.495
965.49	122.637
965.972	108.645
966.454	96.6474
966.937	86.1583
967.419	77.0476
967.901	68.59
968.383	60.7562
968.865	53.3229
969.347	46.2871
969.829	39.7903
970.311	33.9614
970.793	28.7044
971.275	23.8882
971.758	19.5143
972.24	15.6543
972.722	12.1926
973.204	9.45898
973.686	8.23782
974.168	7.44583
974.65	5.53653
975.132	2.96469
975.615	1.32809
976.097	1.17102
976.579	1.3302
977.061	0.793091
977.543	0.127075
978.025	0.434052
978.507	1.1593
978.989	0.665009
979.471	0.978058
979.954	1.7764
980.436	0.592499
980.918	0.945496
981.4	0.023682
981.882	0.113558
982.364	0.523613
982.846	0.201874
983.328	1.27612
983.811	1.17587
984.293	0.848938
984.775	1.31586
985.257	2.17395
985.739	2.51346
986.221	2.31409
986.703	1.93189
987.185	1.29138
987.668	0.929718
988.15	1.02954
988.632	0.221313
989.114	2.28714
989.596	3.83975
990.078	4.48776
990.56	1.52078
991.042	3.22232
991.524	3.05316
992.006	2.80786
992.489	5.16791
992.971	2.72882
993.453	5.04813
993.935	5.46826
994.417	6.75797
994.899	6.16547
995.381	5.7312
995.864	6.06073
996.346	6.24774
996.828	5.77057
997.31	5.24179
997.792	5.5701
998.274	6.73251
998.756	7.56055
999.238	7.48627
999.72	7.53772
1000.2	8.19864
1000.68	8.86212
1001.17	9.13199
1001.65	9.11212
1002.13	9.03943
1002.61	8.94083
1003.1	8.58377
1003.58	7.52374
1004.06	6.59598
1004.54	6.04446
1005.02	6.02008
1005.51	7.2728
1005.99	9.01871
1006.47	9.43945
1006.95	8.09872
1007.43	6.74234
1007.92	6.7916
1008.4	7.12222
1008.88	6.58063
1009.36	5.67203
1009.85	5.11215
1010.33	4.90832
1010.81	4.80276
1011.29	4.68445
1011.77	4.4053
1012.25	3.65347
1012.74	2.79776
1013.22	2.43137
1013.7	2.41632
1014.18	2.46979
1014.67	2.52649
1015.15	2.49619
1015.63	2.33548
1016.11	2.27954
1016.59	2.8974
1017.08	3.69635
1017.56	2.81668
1018.04	0.790771
1018.52	0.636566
1019	2.68472
1019.49	4.17618
1019.97	3.49438
1020.45	2.22678
1020.93	2.98334
1021.42	5.28217
1021.9	6.15396
1022.38	5.64798
1022.86	5.53442
1023.34	6.17966
1023.83	6.9093
1024.31	7.30676
1024.79	7.52997
1025.27	7.85504
1025.76	8.28024
1026.24	7.89838
1026.72	9.21234
1027.2	10.0556
1027.68	10.4533
1028.16	9.05063
1028.65	9.98901
1029.13	9.99939
1029.61	9.9783
1030.09	11.2665
1030.58	10.162
1031.06	11.4434
1031.54	11.7819
1032.02	12.5619
1032.5	12.4078
1032.99	12.5511
1033.47	13.6473
1033.95	14.2322
1034.43	13.9973
1034.91	14.8467
1035.4	13.7783
1035.88	14.4056
1036.36	15.7684
1036.84	15.6153
1037.33	16.4929
1037.81	16.9453
1038.29	16.0394
1038.77	15.406
1039.25	15.3196
1039.74	16.1794
1040.22	15.6917
1040.7	17.0267
1041.18	17.7443
1041.66	17.8775
1042.15	15.6769
1042.63	16.4902
1043.11	16.0956
1043.59	15.6516
1044.08	16.889
1044.56	15.0279
1045.04	16.2387
1045.52	16.2232
1046	16.7688
1046.49	16.0993
1046.97	15.8051
1047.45	13.1444
1047.93	11.3221
1048.41	10.7498
1048.9	10.8017
1049.38	12.385
1049.86	13.6384
1050.34	12.6606
1050.83	10.446
1051.31	8.81097
1051.79	7.97772
1052.27	7.61606
1052.75	8.01541
1053.23	8.40588
1053.72	8.71393
1054.2	8.7637
1054.68	8.16287
1055.16	7.32568
1055.65	7.08533
1056.13	7.55823
1056.61	7.91403
1057.09	5.3298
1057.57	7.76389
1058.06	9.09415
1058.54	9.38644
1059.02	5.53397
1059.5	7.08582
1059.98	6.45193
1060.47	5.8085
1060.95	8.07068
1061.43	4.78653
1061.91	6.99927
1062.4	7.08444
1062.88	8.11075
1063.36	6.96719
1063.84	6.5274
1064.32	8.22296
1064.81	8.80441
1065.29	7.40518
1065.77	8.49417
1066.25	5.13437
1066.73	5.67862
1067.22	7.90793
1067.7	6.616
1068.18	7.74316
1068.66	7.94913
1069.14	3.96787
1069.63	7.28451
1070.11	7.44074
1070.59	4.35843
1071.07	7.40982
1071.56	6.67148
1072.04	6.72156
1072.52	6.36868
1073	5.9281
1073.48	5.55453
1073.97	5.37427
[truncated: 440 more rows]
