# Supplementary material for: Putative fossil blood cells reinterpreted as diagenetic structures
Source: PeerJ. 2021 Dec 16;9:e12651. doi: 10.7717/peerj.12651 (PMC8684720; doi:10.7717/peerj.12651)
Supplement: Supplemental Information 3 [file peerj-09-12651-s003.xlsx]

## Sheet: 2018-L1_EpoxyFullPower
Raman shift	Spectrum
100	2060.67
100.692	2093.08
101.383	2038.65
102.075	2003.42
102.767	1990.29
103.458	1979.5
104.15	1967.58
104.842	2005.34
105.533	2034.82
106.225	1983.83
106.917	1964.36
107.608	1939.92
108.3	1903.31
108.992	1940.9
109.683	1905.54
110.375	1957.45
111.067	1953.26
111.758	1947.78
112.45	1944.76
113.142	1901.04
113.833	1915.79
114.525	1862.74
115.217	1924.69
115.908	1937.91
116.6	1880.46
117.292	1828.37
117.983	1849.95
118.675	1892.53
119.367	1845.51
120.058	1826.03
120.75	1840.1
121.442	1848.5
122.133	1816.53
122.825	1801.34
123.517	1763.04
124.208	1751.39
124.9	1729.92
125.592	1738.97
126.283	1796.12
126.975	1677.1
127.667	1681.86
128.358	1683
129.05	1691.17
129.742	1708.94
130.433	1699.94
131.125	1603.88
131.817	1595.43
132.508	1629.95
133.2	1586.97
133.892	1562.52
134.583	1563.39
135.275	1536.54
135.967	1583.03
136.658	1486.19
137.35	1477.48
138.042	1487.7
138.733	1496.61
139.425	1488.01
140.116	1427.23
140.808	1423.41
141.5	1427.92
142.191	1385.54
142.883	1373.79
143.575	1389.38
144.266	1380.94
144.958	1410.19
145.65	1374.03
146.341	1303.2
147.033	1287.86
147.725	1300
148.416	1290.06
149.108	1255.67
149.8	1246.34
150.491	1238.93
151.183	1203.13
151.875	1181.33
152.566	1186.36
153.258	1194.69
153.95	1168.54
154.641	1199.53
155.333	1214.48
156.025	1186.5
156.716	1162.12
157.408	1142.73
158.1	1093.35
158.791	1158.34
159.483	1103.73
160.175	1107.1
160.866	1100.53
161.558	1050.69
162.25	1003.31
162.941	1062.48
163.633	1069.72
164.325	1062.94
165.016	1059.9
165.708	1053.1
166.4	1036.11
167.091	1019.36
167.783	1041.88
168.475	983.18
169.166	978.833
169.858	954.608
170.55	967.212
171.241	1003.83
171.933	979.055
172.625	1016.55
173.316	956.608
174.008	981.861
174.7	966.576
175.391	932.014
176.083	931.723
176.775	941.477
177.466	869.064
178.158	920.84
178.85	895.791
179.541	859.845
180.233	875.432
180.925	930.143
181.616	926.14
182.308	918.877
183	884.642
183.691	862.061
184.383	859.742
185.075	864.307
185.766	860.186
186.458	857.897
187.15	824.621
187.841	806.863
188.533	798.259
189.225	809.494
189.916	817.776
190.608	789.178
191.3	771.684
191.991	784.62
192.683	757.232
193.375	729.534
194.066	724.877
194.758	716.482
195.45	669.499
196.141	712.64
196.833	642.738
197.525	668.673
198.216	674.841
198.908	671.297
199.6	683.379
200.291	681.724
200.983	646.623
201.675	660.098
202.366	651.417
203.058	658.171
203.75	658.576
204.441	645.797
205.133	657.848
205.825	629.608
206.516	652.655
207.208	646.552
207.9	638.16
208.591	641.858
209.283	639.798
209.975	602.743
210.666	614.297
211.358	593.254
212.05	629.446
212.741	637.24
213.433	638.587
214.125	651.598
214.816	621.461
215.508	625.751
216.199	607.838
216.891	586.53
217.583	601.581
218.274	581.55
218.966	534.54
219.658	599.083
220.349	608.519
221.041	622.856
221.733	596.686
222.424	571.057
223.116	584.854
223.808	613.239
224.499	583.223
225.191	553.615
225.883	557.053
226.574	536.7
227.266	551.578
227.958	579.703
228.649	578.664
229.341	544.195
230.033	542.036
230.724	547.913
231.416	565.915
232.108	562.261
232.799	546.129
233.491	537.797
234.183	541.615
234.874	530.483
235.566	527.04
236.258	496.276
236.949	516.238
237.641	533.724
238.333	529.285
239.024	527.905
239.716	512.699
240.408	504.946
241.099	501.73
241.791	490.804
242.483	507.31
243.174	533.2
243.866	530.515
244.558	511.714
245.249	521.199
245.941	480.561
246.633	484.822
247.324	480.404
248.016	473.409
248.708	488.815
249.399	510.414
250.091	497.048
250.783	520.105
251.474	497.35
252.166	493.044
252.858	495.538
253.549	492.391
254.241	496.125
254.933	481.968
255.624	478.514
256.316	466.609
257.008	470.593
257.699	478.316
258.391	470.859
259.083	454.114
259.774	470.65
260.466	457.245
261.158	461.888
261.849	448.909
262.541	459.498
263.233	468.853
263.924	459.168
264.616	470.236
265.308	468.066
265.999	453.329
266.691	457.191
267.383	430.4
268.074	433.236
268.766	462.385
269.458	449.497
270.149	427.292
270.841	435.084
271.533	459.684
272.224	452.185
272.916	455.685
273.608	458.191
274.299	446.508
274.991	461.359
275.683	428.435
276.374	449.403
277.066	459.927
277.758	458.003
278.449	456.662
279.141	459.059
279.833	450.489
280.524	412.461
281.216	411.15
281.908	435.962
282.599	421.589
283.291	437.687
283.983	462.657
284.674	448.154
285.366	421.284
286.058	431.71
286.749	427.781
287.441	411.338
288.133	421.261
288.824	413.002
289.516	411.894
290.207	461.346
290.899	457.782
291.591	446.49
292.283	432.397
292.974	448.237
293.666	460.403
294.357	466.731
295.049	466.886
295.741	450.579
296.432	451.068
297.124	456.29
297.816	455.497
298.507	447.54
299.199	434.639
299.891	435.774
300.582	454.98
301.274	459.197
301.966	439.589
302.657	434.366
303.349	434.225
304.041	433.624
304.732	427.052
305.424	421.971
306.116	429.901
306.807	443.28
307.499	415.807
308.191	429.478
308.882	421.003
309.574	433.914
310.266	437.971
310.957	429.134
311.649	440.047
312.341	434.701
313.032	419.421
313.724	406.931
314.416	429.204
315.107	446.826
315.799	444.459
316.491	431.488
317.182	419.342
317.874	402.528
318.566	419.123
319.257	411.714
319.949	393.149
320.641	406.125
321.332	423.237
322.024	415.507
322.716	410.562
323.407	437.563
324.099	413.084
324.791	435.607
325.482	407.424
326.174	389.565
326.866	398.591
327.557	421.318
328.249	452.397
328.941	429.504
329.632	429.058
330.324	408.453
331.016	415.36
331.707	419.931
332.399	426.672
333.091	439.773
333.782	435.992
334.474	451.788
335.166	469.733
335.857	449.432
336.549	444.105
337.241	445.779
337.932	441.018
338.624	436.806
339.316	450.248
340.007	459.837
340.699	432.217
341.391	431.718
342.082	464.743
342.774	480.683
343.466	486.823
344.157	498.643
344.849	495.651
345.541	468.242
346.232	543.694
346.924	566.057
347.616	536.5
348.307	558.066
348.999	583.338
349.691	599.256
350.382	660.978
351.074	684.833
351.766	637.805
352.457	665.128
353.149	682.425
353.841	687.573
354.532	695.231
355.224	718.544
355.916	739.83
356.607	710.695
357.299	727.395
357.991	704.712
358.682	695.782
359.374	711.261
360.066	697.995
360.757	673.648
361.449	669.285
362.14	648.742
362.832	660.834
363.524	625.169
364.216	592.58
364.907	622.053
365.599	624.076
366.291	614.316
366.982	613.964
367.674	587.762
368.365	594.317
369.057	600.049
369.749	600.509
370.44	599.466
371.132	568.641
371.824	546.231
372.515	542.487
373.207	533.53
373.899	531.923
374.59	549.139
375.282	483.097
375.974	499.692
376.665	495.208
377.357	478.862
378.049	462.989
378.74	449.823
379.432	448.156
380.124	448.18
380.815	429.653
381.507	410.299
382.199	444.488
382.89	433.765
383.582	406.834
384.274	409.43
384.965	419.956
385.657	394.718
386.349	422.124
387.04	401.587
387.732	377.365
388.424	368.905
389.115	380.032
389.807	382.857
390.499	364.728
391.19	351.007
391.882	356.915
392.574	340.985
393.265	344.976
393.957	353.858
394.649	379.187
395.34	387.465
396.032	379.952
396.724	377.091
397.415	369.048
398.107	354.237
398.799	362.2
399.49	347.466
400.182	345.559
400.874	353.332
401.565	348.06
402.257	344.708
402.949	357.624
403.64	341.681
404.332	346.995
405.024	334.597
405.715	343.047
406.407	334.46
407.099	332.059
407.79	341.069
408.482	346.759
409.174	345.218
409.865	355.421
410.557	335.895
411.249	359.874
411.94	355.544
412.632	349.125
413.324	337.664
414.015	340.043
414.707	350.338
415.399	342.97
416.09	351
416.782	351
417.474	351.862
418.165	340.366
418.857	356.658
419.549	363.242
420.24	351.482
420.932	356.185
421.624	385.513
422.315	365.724
423.007	373.292
423.699	345.423
424.39	370.386
425.082	358.461
425.774	333.72
426.465	343.854
427.157	363.306
427.849	347.272
428.54	368
429.232	368
429.924	358.836
430.615	364.394
431.307	357.651
431.999	343.712
432.69	344.306
433.382	350.903
434.074	343.274
434.765	350.016
435.457	382.491
436.149	368.214
436.84	333.141
437.532	332.793
438.224	341.544
438.915	353.048
439.607	361.275
440.298	359.369
440.99	356.076
441.682	327.716
442.373	318.794
443.065	316.374
443.757	332.239
444.448	345.893
445.14	345.836
445.832	324.465
446.523	305.649
447.215	325.593
447.907	327.694
448.598	351.397
449.29	346.117
449.982	329.365
450.673	311.227
451.365	313.053
452.057	328.035
452.748	339.11
453.44	346.16
454.132	356.469
454.823	331.527
455.515	337.793
456.207	346.429
456.898	369.809
457.59	348.091
458.282	335.523
458.973	341.301
459.665	332.373
460.357	335.336
461.048	353.719
461.74	372.535
462.432	324.282
463.123	352.005
463.815	378.598
464.507	373.636
465.198	365.536
465.89	366.225
466.582	366.481
467.273	386.099
467.965	354.115
468.657	359.948
469.348	340.24
470.04	348.253
470.732	363.788
471.423	344.927
472.115	322.496
472.807	334.391
473.498	349.873
474.19	338.266
474.882	311.36
475.573	320.312
476.265	328.567
476.957	314.831
477.648	337.936
478.34	349.003
479.032	354.328
479.723	378.599
480.415	361.985
481.107	339.616
481.798	359.851
482.49	367.886
483.182	377.446
483.873	361.322
484.565	355.965
485.257	359.703
485.948	385.515
486.64	418.176
487.332	391.767
488.023	410.141
488.715	398
489.407	403.979
490.098	378.262
490.79	422.085
491.482	447.659
492.173	444.453
492.865	448.07
493.557	456.327
494.248	445.931
494.94	436.863
495.632	421.546
496.323	458.81
497.015	471.819
497.707	474.342
498.398	471.353
499.09	508.621
499.782	534.459
500.473	497.146
501.165	484.105
501.857	509.149
502.548	477.578
503.24	481.428
503.932	489.492
504.623	493.918
505.315	483.148
506.007	483.913
506.698	482.861
507.39	456.392
508.082	422.376
508.773	392.422
509.465	408.431
510.157	400.745
510.848	388.181
511.54	378.664
512.232	366.645
512.923	360.473
513.615	350.31
514.307	330.646
514.998	311.399
515.69	298.922
516.382	330.3
517.073	306.762
517.765	272.541
518.456	301.22
519.148	281.752
519.84	281.335
520.531	278.481
521.223	273.458
521.915	282.953
522.607	262.765
523.298	258.761
523.99	270.538
524.681	288.645
525.373	265.702
526.065	252.812
526.756	274.672
527.448	280.486
528.14	267.041
528.831	259.832
529.523	261.255
530.215	262.132
530.906	240.323
531.598	266.606
532.29	270.138
532.981	254.85
533.673	251.539
534.365	257.682
535.056	261.005
535.748	259.887
536.44	258.681
537.131	259.477
537.823	263.699
538.515	258.509
539.206	258.509
539.898	243.914
540.59	252.249
541.281	262.261
541.973	276.599
542.665	279.096
543.356	272.103
544.048	275.269
544.74	286.124
545.431	281.79
546.123	274.194
546.815	290.995
547.506	280.025
548.198	275.329
548.89	266.417
549.581	285.287
550.273	293.853
550.965	277.531
551.656	261.863
552.348	261.493
553.04	283.332
553.731	278.536
554.423	268.981
555.115	281.042
555.806	279.517
556.498	278.16
557.19	275.913
557.881	273.492
558.573	272.929
559.265	272.679
559.956	268.087
560.648	263.936
561.34	289.537
562.031	269.027
562.723	248.498
563.415	263.232
564.106	270.713
564.798	266.687
565.49	271.573
566.181	272.216
566.873	264.147
567.565	265.434
568.256	267.504
568.948	255.417
569.64	263.371
570.331	254.239
571.023	250.988
571.715	268.194
572.406	253.353
573.098	236.34
573.79	250.989
574.481	268.765
575.173	258.448
575.865	244.684
576.556	253.652
577.248	282.842
577.94	280.565
578.631	269.805
579.323	278.995
580.015	276.461
580.706	288.5
581.398	275.85
582.09	266.689
582.781	268.834
583.473	266.173
584.165	290.181
584.856	307.893
585.548	309.387
586.24	285.584
586.931	295.431
587.623	292.259
588.315	322.066
589.006	314.449
589.698	320.611
590.39	329.221
591.081	326.269
591.773	330.96
592.464	318.509
593.156	314.261
593.848	286.934
594.539	367.149
595.231	354.415
595.923	359.9
596.615	350.673
597.306	349.446
597.998	373.221
598.689	388.745
599.381	375.277
600.073	373.044
600.764	400.221
601.456	375.098
602.148	384.276
602.839	362.241
603.531	359.282
604.223	372.717
604.914	375.644
605.606	367.127
606.298	373.498
606.989	379.351
607.681	370.885
608.373	364.917
609.064	365.428
609.756	354.456
610.448	371.789
611.139	363.501
611.831	344.192
612.523	314.776
613.214	310.27
613.906	330.251
614.598	332.899
615.289	331.639
615.981	331.189
616.673	324.823
617.364	320.293
618.056	313.604
618.748	295.642
619.439	304.905
620.131	332.558
620.823	297.945
621.514	302.828
622.206	308.665
622.898	301.825
623.589	274.452
624.281	269.726
624.973	289.575
625.664	285.435
626.356	266.272
627.048	284.867
627.739	262.601
628.431	279.559
629.123	280.935
629.814	288.907
630.506	288.397
631.198	257.91
631.889	272.78
632.581	261.562
633.273	262.311
633.964	286.904
634.656	285.63
635.348	273.508
636.039	272.538
636.731	243.114
637.423	230.333
638.114	273.786
638.806	247.095
639.498	265.453
640.189	266.826
640.881	263.85
641.573	256.849
642.264	251.486
642.956	254.877
643.648	257.612
644.339	254.951
645.031	263.454
645.723	269.8
646.414	252.645
647.106	247.561
647.798	246.126
648.489	268.339
649.181	246.743
649.873	265.773
650.564	261.651
651.256	265.437
651.948	260.839
652.639	247.321
653.331	257.765
654.023	266.358
654.714	262.088
655.406	256.192
656.098	243.153
656.789	284.411
657.481	253.896
658.173	249.598
658.864	255.486
659.556	278.087
660.248	259.032
660.939	260.487
661.631	267.466
662.323	260.335
663.014	262.064
663.706	247.226
664.398	247.436
665.089	233.873
665.781	261.691
666.473	224.081
667.164	250.104
667.856	251.049
668.547	238.883
669.239	254.357
669.931	240.082
670.622	238.199
671.314	242.011
672.006	229.323
672.698	227.272
673.389	232.629
674.081	225.369
674.772	234.911
675.464	230.306
676.156	226.584
676.847	225.598
677.539	228.04
678.231	221.147
678.922	218.654
679.614	226.15
680.306	239.032
680.997	228.515
681.689	219.711
682.381	228.871
683.072	228.66
683.764	224.655
684.456	197.027
685.147	231.504
685.839	182.247
686.531	191.567
687.222	230.716
687.914	218.244
688.606	215.265
689.297	210.694
689.989	214.722
690.681	208.532
691.372	204.649
692.064	211.526
692.756	211.283
693.447	199.893
694.139	188.955
694.831	190.977
695.522	196.04
696.214	221.272
696.906	212.395
697.597	179.404
698.289	196.213
698.981	205.083
699.672	207.207
700.364	199.922
701.056	196.354
701.747	202.776
702.439	202.6
703.131	202.461
703.822	209.297
704.514	193.101
705.206	185.469
705.897	197.326
706.589	185.052
707.281	194.874
707.972	203.78
708.664	196.772
709.356	170.026
710.047	173.772
710.739	192.917
711.431	204.15
712.122	204.603
712.814	191.004
713.506	176.544
714.197	177.345
714.889	180.317
715.581	179.019
716.272	192.342
716.964	189.095
717.656	169.454
718.347	190.09
719.039	182.238
719.731	194.789
720.422	168.761
721.114	173.989
721.806	197.344
722.497	179.61
723.189	178.732
723.881	179.286
724.572	174.777
725.264	197.521
725.956	210.384
726.647	201.912
727.339	218.23
728.031	212.201
728.722	182.496
729.414	239.23
730.106	187.536
730.797	211.057
731.489	195.94
732.181	212.659
732.872	216.884
733.564	202.751
734.256	189.046
734.947	197.445
735.639	212.282
736.331	210.674
737.022	211.253
737.714	215.673
738.406	198.635
739.097	223.771
739.789	200.685
740.481	194.747
741.172	198.52
741.864	209.821
742.556	167.122
743.247	177.232
743.939	180.509
744.63	215.422
745.322	219.349
746.014	208.927
746.706	188.211
747.397	177.863
748.089	203.634
748.781	215.896
749.472	195.875
750.164	214.705
750.855	216.895
751.547	197.457
752.239	211.517
752.93	175.699
753.622	181.367
754.314	199.911
755.005	218.366
755.697	202.808
756.389	223.754
757.08	217.339
757.772	213.9
758.464	205.517
759.155	207.829
759.847	194.711
760.539	186.765
761.23	219.129
761.922	226.893
762.614	199.73
763.305	201.319
763.997	214.935
764.689	209.245
765.38	211.333
766.072	207.547
766.764	217.809
767.455	222.925
768.147	237.198
768.839	209.348
769.53	217.142
770.222	199.033
770.914	189.786
771.605	201.385
772.297	220.008
772.989	226.834
773.68	207.44
774.372	202.36
775.064	228.623
775.755	213.755
776.447	201.892
777.139	213.126
777.83	222.938
778.522	225.769
779.214	199.237
779.905	220.629
780.597	190.437
781.289	186.509
781.98	217.221
782.672	222.562
783.364	221.16
784.055	232.13
784.747	242.606
785.439	227.322
786.13	219.503
786.822	226.261
787.514	219.384
788.205	216.188
788.897	219.518
789.589	213.241
790.28	229.791
790.972	216.375
791.664	233.028
792.355	217.32
793.047	212.565
793.739	232.708
794.43	217.071
795.122	202.795
795.814	240.985
796.505	229.901
797.197	242.358
797.889	242.562
798.58	217.845
799.272	232.633
799.964	251.811
800.655	247.294
801.347	239.92
802.039	248.149
802.73	266.647
803.422	260.354
804.114	278.819
804.805	284.718
805.497	288.313
806.189	328.865
806.88	321.866
807.572	368.03
808.264	374.255
808.955	391.571
809.647	439.652
810.339	436.847
811.03	434.983
811.722	426.282
812.414	402.984
813.105	391.852
813.797	365.684
814.489	332.183
815.18	312.015
815.872	298.691
816.564	285.068
817.255	259.332
817.947	255.929
818.638	246.171
819.33	247.052
820.022	237.367
820.713	226.154
821.405	232.783
822.097	223.531
822.789	219.549
823.48	224.544
824.172	228.674
824.863	218.512
825.555	217.533
826.247	223.58
826.938	228.021
827.63	221.013
828.322	226.048
829.013	217.797
829.705	211.73
830.397	218.362
831.088	219.485
831.78	211.45
832.472	209.47
833.163	201.849
833.855	200.439
834.547	216.396
835.238	199.496
835.93	208.773
836.622	211.705
837.313	198.826
838.005	200.598
838.697	216.755
839.388	213.249
840.08	213.38
840.772	223.381
841.463	234.017
842.155	233.933
842.847	234.859
843.538	235.289
844.23	246.956
844.922	243.879
845.613	247.273
846.305	249.202
846.997	263.06
847.688	283.955
848.38	300.131
849.072	316.473
849.763	322.339
850.455	341.935
851.147	374.892
851.838	372.978
852.53	368.799
853.222	388.71
853.913	398.239
854.605	408.814
855.297	441.26
855.988	431.806
856.68	436.891
857.372	469.126
858.063	453.599
858.755	472.226
859.447	484.98
860.138	459.04
860.83	441.087
861.522	445.543
862.213	410.407
862.905	377.544
863.597	365.371
864.288	368.195
864.98	340.004
865.672	287.459
866.363	282.228
867.055	277.023
867.747	263.633
868.438	266.421
869.13	261.701
869.822	248.151
870.513	230.341
871.205	225.018
871.897	236.181
872.588	237.725
873.28	230.618
873.972	234.912
874.663	234.493
875.355	221.712
876.047	240.764
876.738	206.215
877.43	201.291
878.122	211.648
878.813	191.789
879.505	216.168
880.197	201.382
880.888	169.238
881.58	184.863
882.272	199.13
882.963	216.312
883.655	210.996
884.347	194.074
885.038	182.988
885.73	173.761
886.422	178.825
887.113	189.32
887.805	189.022
888.497	186.623
889.188	175.47
889.88	181.712
890.572	183.591
891.263	192.509
891.955	181.191
892.647	182.193
893.338	164.581
894.03	178.615
894.721	168.013
895.413	159.296
896.105	175.312
896.797	180.486
897.488	172.474
898.18	174.153
898.872	173.473
899.563	171.388
900.255	161.088
900.946	173.366
901.638	171.284
902.33	169.025
903.021	171.882
903.713	141.921
904.405	141.383
905.096	166.757
905.788	162.288
906.48	166.791
907.171	177.754
907.863	190.272
908.555	189.635
909.246	169.974
909.938	177.205
910.63	178.121
911.321	174.289
912.013	169.02
912.705	161
913.396	160.83
914.088	157.266
914.78	184.344
915.471	152.712
916.163	199.071
916.855	182.702
917.546	178.094
918.238	185.118
918.93	167.221
919.621	167.79
920.313	166.912
921.005	158.381
921.696	161.408
922.388	162.917
923.08	163.687
923.771	156.468
924.463	156.675
925.155	158.297
925.846	161.369
926.538	171.653
927.23	168.911
927.921	157.648
928.613	155.352
929.305	162.425
929.996	165.269
930.688	175.836
931.38	160.561
932.071	162.129
932.763	171.16
933.455	169.2
934.146	175.207
934.838	163.236
935.53	176.78
936.221	153.584
936.913	182.705
937.605	158.741
938.296	153.32
938.988	164.561
939.68	158.775
940.371	181.525
941.063	183.326
941.755	176.451
942.446	164.26
943.138	163.944
943.83	168.541
944.521	172.578
945.213	162.023
945.905	152.788
946.596	170.774
947.288	180.566
947.98	172.43
948.671	171.009
949.363	171.927
950.055	165.598
950.746	165.615
951.438	179.625
952.13	183.442
952.821	176.907
953.513	188.604
954.205	190.086
954.896	181.847
955.588	186.586
956.28	200.996
956.971	203.344
957.663	196.961
958.355	202.586
959.046	228.766
959.738	197.303
960.43	211.732
961.121	230.231
961.813	218.323
962.505	233.908
963.196	224.146
963.888	224.755
964.58	216.354
965.271	230.597
965.963	223.098
966.655	212.29
967.346	224.269
968.038	214.491
968.73	204.785
969.421	204.381
970.113	210.037
970.804	202.326
971.496	207.954
972.188	223.396
972.88	232.887
973.571	229.764
974.263	220.762
974.954	224.125
975.646	217.438
976.338	209.336
977.029	214.017
977.721	216.372
978.413	219.856
979.104	219.798
979.796	221.757
980.488	229.677
981.179	221.572
981.871	225.659
982.563	236.288
983.254	227.234
983.946	240.105
984.638	240.551
985.329	239.94
986.021	236.737
986.713	228.427
987.404	231.757
988.096	230.256
988.788	201.216
989.479	225.16
990.171	225.264
990.863	223.616
991.554	244.822
992.246	250.722
992.938	236.058
993.629	226.498
994.321	241.104
995.013	251.674
995.704	241.087
996.396	233.211
997.088	240.44
997.779	243.602
998.471	254.835
999.163	227.793
999.854	236.294
1000.55	248.384
1001.24	248.3
1001.93	264.678
1002.62	227.8
1003.31	218.786
1004	233.043
1004.7	230.702
1005.39	217.532
1006.08	228.616
1006.77	252.667
1007.46	239.645
1008.15	237.17
1008.85	241.339
1009.54	233.497
1010.23	215.59
1010.92	230.909
1011.61	233.368
1012.3	231.333
1013	219.4
1013.69	220.947
1014.38	227.049
1015.07	211.524
1015.76	193.635
1016.45	189.918
1017.15	207.106
1017.84	213.907
1018.53	200.742
1019.22	211.903
1019.91	213.997
1020.6	202.555
1021.3	212.772
1021.99	207.851
1022.68	215.008
1023.37	214.431
1024.06	200.447
1024.75	190.782
1025.45	212.764
1026.14	222.576
1026.83	205.712
1027.52	193.593
1028.21	203.113
1028.9	201.449
1029.6	211.589
1030.29	224.214
1030.98	234.026
1031.67	226.327
1032.36	240.951
1033.05	220.452
1033.75	218.677
1034.44	229.928
1035.13	212.386
1035.82	236.301
1036.51	217.951
1037.2	230.476
1037.9	227.484
1038.59	230.113
1039.28	223
1039.97	223.27
1040.66	225.839
1041.35	224.78
1042.05	234.864
1042.74	230.96
1043.43	197.877
1044.12	217.96
1044.81	216.976
1045.5	224.506
1046.2	206.02
1046.89	209.986
1047.58	208.801
1048.27	203.118
1048.96	183.367
1049.65	175.08
1050.35	196.755
1051.04	186.418
1051.73	204.575
1052.42	205.786
1053.11	199.521
1053.8	174.997
1054.5	172.786
1055.19	198.919
1055.88	181.413
1056.57	202.065
1057.26	201.479
1057.95	172.857
1058.65	170.52
1059.34	181.972
1060.03	185.494
1060.72	191.055
1061.41	197.712
1062.1	190.418
1062.8	179.645
1063.49	185.213
1064.18	173.848
1064.87	174.257
1065.56	172.401
1066.25	176.778
1066.95	181.193
1067.64	199.278
1068.33	174.757
1069.02	166.048
1069.71	184.499
1070.4	174.449
1071.1	164.44
1071.79	171.39
1072.48	186.977
1073.17	177.335
1073.86	180.551
1074.55	183.59
1075.25	177.799
1075.94	166.26
1076.63	179.895
1077.32	170.427
1078.01	184.871
1078.7	180.851
1079.4	174.751
1080.09	164.537
1080.78	163.02
1081.47	173.343
1082.16	174.116
1082.85	163.66
1083.55	154.827
1084.24	186.397
1084.93	179.109
1085.62	182.176
1086.31	185.365
1087	184.228
1087.7	186.124
1088.39	194.782
1089.08	179.634
1089.77	179.051
1090.46	184.819
1091.15	188.666
1091.85	197.529
1092.54	181.943
1093.23	211.292
1093.92	217.705
1094.61	216.601
1095.3	210.186
1096	218.277
1096.69	218.061
1097.38	220.79
1098.07	239.751
1098.76	232.638
1099.45	223.395
1100.15	221.848
1100.84	216.096
1101.53	235.883
1102.22	213.483
1102.91	175.218
1103.6	196.595
1104.3	207.559
1104.99	228.513
1105.68	234.767
1106.37	245.636
1107.06	245.624
1107.75	250.588
1108.45	255.205
1109.14	257.477
1109.83	268.371
1110.52	284.647
1111.21	280.03
1111.9	301.629
1112.6	296.356
1113.29	297.144
1113.98	307.166
1114.67	282.372
1115.36	275.541
1116.05	278.324
1116.75	270.261
1117.44	272.485
1118.13	276.149
1118.82	268.069
1119.51	263.564
1120.2	257.209
1120.9	245.457
1121.59	220.053
1122.28	225.606
1122.97	237.068
1123.66	199.151
1124.35	224.442
1125.05	223.423
1125.74	205.886
1126.43	210.506
1127.12	217.994
1127.81	212.93
1128.5	200.455
1129.2	205.83
1129.89	200.765
1130.58	199.106
1131.27	191.597
1131.96	208.24
1132.65	193.517
1133.35	204.001
1134.04	192.901
1134.73	206.831
1135.42	211.575
1136.11	186.95
1136.8	193.492
1137.5	172.418
1138.19	213.911
1138.88	223.688
1139.57	199.842
1140.26	204.755
1140.95	199.921
1141.65	209.313
1142.34	230.207
1143.03	214.141
1143.72	221.425
1144.41	211.495
1145.1	217.698
1145.8	199.753
1146.49	188.649
1147.18	217.389
1147.87	218.894
1148.56	203.386
1149.25	203.801
1149.95	232.507
1150.64	221.601
1151.33	235.322
1152.02	235.621
1152.71	245.904
1153.4	234.185
1154.1	218.563
1154.79	225.128
1155.48	257.725
1156.17	239.678
1156.86	243.547
1157.55	242.65
1158.25	250.697
1158.94	247.912
1159.63	238.628
1160.32	249.103
1161.01	250.439
1161.7	238.56
1162.4	246.309
1163.09	248.997
1163.78	254.902
1164.47	245.767
1165.16	214.224
1165.85	228.627
1166.55	232.072
1167.24	217.05
1167.93	226.112
1168.62	245.709
1169.31	242.799
1170	239.436
1170.7	217.962
1171.39	228.664
1172.08	238.369
1172.77	237.208
1173.46	243.79
1174.15	237.852
1174.85	232.822
1175.54	221.336
1176.23	215.274
1176.92	230.859
1177.61	237.567
1178.3	241.894
1179	246.71
1179.69	250.716
1180.38	233.236
1181.07	240.007
1181.76	238.525
1182.45	245.622
1183.15	242.885
1183.84	257.637
1184.53	233.744
1185.22	244.63
1185.91	263.837
1186.6	257.67
1187.3	269.893
1187.99	231.509
1188.68	244.132
1189.37	261.603
1190.06	259.014
1190.75	242.084
1191.45	263.247
1192.14	275.289
1192.83	247.701
1193.52	248.044
1194.21	289.335
1194.9	279.033
1195.6	296.549
1196.29	269.285
1196.98	258.721
1197.67	254.812
1198.36	279.642
1199.05	290.113
1199.75	269.422
1200.44	288.841
1201.13	289.55
1201.82	274.622
1202.51	292.327
1203.2	306.155
1203.9	302.781
1204.59	291.911
1205.28	290.475
1205.97	282.927
1206.66	277.919
1207.35	288.927
1208.05	304.076
1208.74	295.043
1209.43	293.131
1210.12	299.101
1210.81	297.304
1211.5	305.767
1212.2	296.426
1212.89	279.305
1213.58	286.767
1214.27	280.871
1214.96	264.17
1215.65	298.742
1216.35	274.048
1217.04	292.793
1217.73	281.867
1218.42	296.197
1219.11	279.11
1219.8	269.628
1220.5	281.062
1221.19	307.906
1221.88	304.815
1222.57	289.704
1223.26	284.701
1223.95	279.819
1224.64	302.464
1225.34	273.558
1226.03	244.995
1226.72	266.003
1227.41	279.635
1228.1	274.543
1228.8	287.786
1229.49	288.334
1230.18	284.448
1230.87	273.237
1231.56	274.727
1232.25	274.307
1232.95	274.343
1233.64	274.257
1234.33	264.938
1235.02	248.891
1235.71	259.319
1236.4	272.264
1237.1	273.735
1237.79	276.381
1238.48	267.491
1239.17	275.201
1239.86	271.85
1240.55	284.743
1241.24	289.036
1241.94	266.301
1242.63	280.531
1243.32	260.973
1244.01	269.674
1244.7	270.228
1245.39	267.057
1246.09	253.567
1246.78	264.682
1247.47	255.881
1248.16	279.521
1248.85	271.23
1249.54	261.135
1250.24	270.849
1250.93	270.202
1251.62	304.121
1252.31	272.841
1253	263.563
1253.69	258.176
1254.39	259.378
1255.08	258.428
1255.77	267
1256.46	269.336
1257.15	277.669
1257.85	275.49
1258.54	284.256
1259.23	300.775
1259.92	296.626
1260.61	283.465
1261.3	288.502
1261.99	284.746
1262.69	289.421
1263.38	248.892
1264.07	238.682
1264.76	286.018
1265.45	292.825
1266.14	271.328
1266.84	302.698
1267.53	298.431
1268.22	278.751
1268.91	313.637
1269.6	319.822
1270.29	321.702
1270.99	329.405
1271.68	307.385
1272.37	305.832
1273.06	312.587
1273.75	318.36
1274.44	320.77
1275.14	330.169
1275.83	321.279
1276.52	317.633
1277.21	334.584
1277.9	337.517
1278.59	337.505
1279.29	339.283
1279.98	342.08
1280.67	324.869
1281.36	331.25
1282.05	322.856
1282.74	324.447
1283.44	317.051
1284.13	332.522
1284.82	338
1285.51	317.278
1286.2	311.299
1286.89	317.516
1287.59	330.589
1288.28	342.793
1288.97	342.291
1289.66	310.166
1290.35	314.151
1291.04	328.862
1291.74	320.594
1292.43	308.971
1293.12	317.105
1293.81	326.864
1294.5	340.723
1295.19	342.017
1295.89	351.24
1296.58	340.34
1297.27	318.414
1297.96	324.277
1298.65	319.345
1299.34	314.716
1300.04	323.732
1300.73	317.575
1301.42	312.44
1302.11	307.856
1302.8	300.097
1303.49	330.524
1304.19	320.318
1304.88	334.144
1305.57	320.985
1306.26	304.743
1306.95	305.892
1307.64	327.214
1308.34	312.101
1309.03	295.258
1309.72	280.935
1310.41	286.044
1311.1	305.185
1311.79	294.429
1312.49	286.483
1313.18	295.038
1313.87	287.696
1314.56	274.068
1315.25	271.17
1315.94	304.045
1316.64	287.53
1317.33	285.656
1318.02	270.136
1318.71	285.016
1319.4	269.165
1320.09	286.759
1320.79	292.792
1321.48	289.029
1322.17	262.719
1322.86	261.887
1323.55	271.686
1324.24	270.273
1324.94	270.287
1325.63	278.559
1326.32	260.592
1327.01	253.968
1327.7	271.325
1328.39	277.882
1329.09	271.585
1329.78	253.54
1330.47	263.852
1331.16	264.71
1331.85	276.022
1332.54	262.312
1333.24	240.629
1333.93	271.261
1334.62	245.953
1335.31	262.793
1336	247.649
1336.69	246.571
1337.39	228.845
1338.08	256.583
1338.77	242.147
1339.46	238.202
1340.15	275.057
1340.84	257.685
1341.54	253.144
1342.23	251.183
1342.92	225.162
1343.61	232.887
1344.3	234.43
1344.99	232.531
1345.69	232.153
1346.38	232.091
1347.07	236.257
1347.76	237.161
1348.45	237
1349.14	226.257
1349.84	195.663
1350.53	236.841
1351.22	229.859
1351.91	245.119
1352.6	227.253
1353.29	219.18
1353.99	209.541
1354.68	229.343
1355.37	229.535
1356.06	220.069
1356.75	226.361
1357.44	216.175
1358.14	212.195
1358.83	213.177
1359.52	226.141
1360.21	222.257
1360.9	191.48
1361.59	200.306
1362.29	207.303
1362.98	210.784
1363.67	185.147
1364.36	221.488
1365.05	207.118
1365.74	193.28
1366.44	205.821
1367.13	199.474
1367.82	202.861
1368.51	195.783
1369.2	197.855
1369.89	213
1370.59	211.833
1371.28	209.04
1371.97	202.193
1372.66	193.32
1373.35	194.681
1374.04	208.84
1374.74	191.22
1375.43	178.647
1376.12	190.601
1376.81	169.973
1377.5	179.38
1378.19	202.372
1378.89	182.947
1379.58	197.707
1380.27	206.242
1380.96	206.257
1381.65	199.116
1382.34	182.463
1383.04	179.078
1383.73	185.508
1384.42	202.672
1385.11	202.8
1385.8	205.445
1386.49	196.266
1387.19	216.76
1387.88	200.186
1388.57	187.013
1389.26	199.941
1389.95	212.778
1390.64	197.963
1391.34	207.069
1392.03	225.572
1392.72	210.966
1393.41	219.586
1394.1	213.207
1394.79	196.227
1395.49	210.035
1396.18	230.504
1396.87	221.578
1397.56	218.549
1398.25	207.965
1398.94	184.501
1399.64	210.886
1400.33	219.666
1401.02	203.464
1401.71	206.596
1402.4	208.914
1403.09	193.024
1403.79	205.514
1404.48	205.839
1405.17	214.307
1405.86	217.975
1406.55	221.05
1407.24	207.381
1407.94	206.978
1408.63	210.553
1409.32	211.373
1410.01	217.375
1410.7	205.904
1411.39	204.729
1412.09	209.333
1412.78	218.002
1413.47	216.083
1414.16	224.647
1414.85	229.183
1415.54	237.175
1416.24	226.115
1416.93	217.438
1417.62	219.24
1418.31	222.577
1419	232.372
1419.69	227.806
1420.39	231.634
1421.08	228.907
1421.77	236.898
1422.46	221.917
1423.15	204.608
1423.84	216.627
1424.54	226.857
1425.23	217.096
1425.92	233.552
1426.61	239.77
1427.3	246.835
1427.99	248.539
1428.69	240.278
1429.38	246.353
1430.07	243.221
1430.76	245.544
1431.45	248.07
1432.14	254.359
1432.84	272.814
1433.53	254.597
1434.22	255.693
1434.91	284.109
1435.6	285.085
1436.29	288.771
1436.99	268.009
1437.68	283.222
1438.37	297.405
1439.06	298.655
1439.75	295.987
1440.44	311.508
1441.14	302.914
1441.83	314.098
1442.52	306.614
1443.21	321.771
1443.9	315.65
1444.59	327.488
1445.29	322.689
1445.98	325.629
1446.67	321.87
1447.36	307.863
1448.05	318.243
1448.74	334.046
1449.44	321.662
1450.13	303.508
1450.82	307.406
1451.51	328.802
1452.2	317.01
1452.89	306.294
1453.59	307.529
1454.28	317.172
1454.97	324.147
1455.66	330.025
1456.35	324.965
1457.04	313.416
1457.74	305.826
1458.43	301.577
1459.12	300.519
1459.81	282.041
1460.5	275.94
1461.19	286.708
1461.89	276.059
1462.58	269.858
1463.27	260.317
1463.96	248.373
1464.65	240.93
1465.34	230.433
1466.04	243.712
1466.73	250.2
1467.42	233.477
1468.11	232.42
1468.8	226.779
1469.49	222.189
1470.19	239.42
1470.88	231.874
1471.57	231.568
1472.26	210.276
1472.95	214.973
1473.64	223.387
1474.34	207.117
1475.03	207.15
1475.72	191.214
1476.41	194.536
1477.1	199.896
1477.79	198.261
1478.49	195.843
1479.18	185.548
1479.87	205.151
1480.56	190.444
1481.25	188.17
1481.94	192.425
[truncated: 749 more rows]

## Sheet: 2018-L1_Epoxy
Raman shift	Spectrum
100	353.303
100.692	341.52
101.383	352.706
102.075	362.656
102.767	359.975
103.458	347.76
104.15	339.118
104.842	349.509
105.533	344.455
106.225	345.254
106.917	362.371
107.608	357.307
108.3	332.029
108.992	354.724
109.683	350.993
110.375	346.092
111.067	334.227
111.758	342.522
112.45	355.338
113.142	340.088
113.833	376.787
114.525	317.921
115.217	326.232
115.908	329.995
116.6	324.362
117.292	332.175
117.983	332.549
118.675	312.316
119.367	332.996
120.058	333.973
120.75	332.07
121.442	335.581
122.133	321.367
122.825	339.925
123.517	328.042
124.208	332.944
124.9	332.349
125.592	314.992
126.283	293.777
126.975	303.907
127.667	330.435
128.358	340.341
129.05	335.418
129.742	319.317
130.433	298.427
131.125	283.562
131.817	304.707
132.508	317.986
133.2	325.163
133.892	320.893
134.583	305.581
135.275	292.055
135.967	313.554
136.658	304.524
137.35	315.692
138.042	317.598
138.733	304.889
139.425	292.693
140.116	303.266
140.808	312.949
141.5	320.042
142.191	309.09
142.883	302.558
143.575	304.409
144.266	301.077
144.958	289.692
145.65	275.315
146.341	284.23
147.033	288.501
147.725	275.934
148.416	268.559
149.108	305.114
149.8	277.972
150.491	269.382
151.183	279.645
151.875	283.037
152.566	284.113
153.258	292.775
153.95	276.847
154.641	292.975
155.333	283.051
156.025	268.773
156.716	271.012
157.408	271.835
158.1	238.405
158.791	260.489
159.483	291.464
160.175	284.385
160.866	273.737
161.558	253.786
162.25	233.705
162.941	272.681
163.633	274.381
164.325	277.166
165.016	278.952
165.708	275.189
166.4	271.54
167.091	274.614
167.783	272.403
168.475	257.09
169.166	273.044
169.858	280.006
170.55	287.171
171.241	286.665
171.933	254.77
172.625	253.066
173.316	271.008
174.008	267.34
174.7	260.438
175.391	262.046
176.083	270.467
176.775	270.267
177.466	233.635
178.158	243.855
178.85	261.515
179.541	268.319
180.233	260.422
180.925	245.741
181.616	238.806
182.308	254.654
183	250.144
183.691	241.714
184.383	236.656
185.075	230.942
185.766	223.869
186.458	241.182
187.15	251.051
187.841	239.566
188.533	250.13
189.225	255.297
189.916	246.716
190.608	245.174
191.3	240.051
191.991	245.925
192.683	238.29
193.375	241.778
194.066	244.702
194.758	246.91
195.45	258.45
196.141	214.389
196.833	230.401
197.525	222.381
198.216	211.073
198.908	215.067
199.6	224.515
200.291	213.19
200.983	231.169
201.675	224.306
202.366	240.705
203.058	237.134
203.75	226
204.441	231.036
205.133	246.959
205.825	246.588
206.516	236.062
207.208	236.889
207.9	244.298
208.591	246.546
209.283	242.973
209.975	244.732
210.666	218.182
211.358	222.205
212.05	238.441
212.741	249.121
213.433	249.358
214.125	240.064
214.816	225.343
215.508	237.843
216.199	226.454
216.891	247.53
217.583	244.371
218.274	213.757
218.966	196.404
219.658	226.33
220.349	215.55
221.041	223.15
221.733	240.503
222.424	245.107
223.116	242.176
223.808	239.314
224.499	232.239
225.191	229.663
225.883	241.151
226.574	211.961
227.266	204.667
227.958	210.973
228.649	216.193
229.341	227.37
230.033	216.189
230.724	227.825
231.416	227.886
232.108	211.495
232.799	209.358
233.491	225.14
234.183	231.339
234.874	230.043
235.566	235.696
236.258	218.674
236.949	214.102
237.641	211.963
238.333	207.256
239.024	205.707
239.716	202.35
240.408	222.538
241.099	208.355
241.791	205.824
242.483	203.934
243.174	204.982
243.866	211.395
244.558	200.559
245.249	221.252
245.941	212.395
246.633	193.553
247.324	197.344
248.016	206.575
248.708	205.786
249.399	215.693
250.091	213.104
250.783	209.329
251.474	207.484
252.166	203.434
252.858	207.849
253.549	210.975
254.241	194.444
254.933	202.845
255.624	186.062
256.316	210.04
257.008	199.794
257.699	192.588
258.391	208.4
259.083	224.164
259.774	213.311
260.466	202.565
261.158	185.1
261.849	193.821
262.541	202.028
263.233	204.896
263.924	199.952
264.616	179.242
265.308	212.975
265.999	195.183
266.691	191.168
267.383	198.4
268.074	201.389
268.766	200.581
269.458	201.731
270.149	177.711
270.841	181.549
271.533	209.173
272.224	206.845
272.916	204.545
273.608	205.818
274.299	199.524
274.991	194.704
275.683	195.946
276.374	208.446
277.066	199.554
277.758	193.121
278.449	200.18
279.141	203.716
279.833	188.95
280.524	200.664
281.216	191.606
281.908	195.507
282.599	183.025
283.291	195.131
283.983	211.868
284.674	200.933
285.366	184.605
286.058	197.638
286.749	207.282
287.441	193.742
288.133	182.011
288.824	182.045
289.516	181.453
290.207	178.083
290.899	213.881
291.591	196.508
292.283	195
292.974	194.337
293.666	185.243
294.357	188.03
295.049	192.421
295.741	166.177
296.432	188.169
297.124	201.225
297.816	194.735
298.507	190.488
299.199	196.665
299.891	198.775
300.582	191.296
301.274	196.178
301.966	189.209
302.657	184.414
303.349	169.264
304.041	177.059
304.732	184.02
305.424	180.343
306.116	179.913
306.807	182.89
307.499	174.549
308.191	176.906
308.882	184.426
309.574	187.567
310.266	187.323
310.957	186.094
311.649	182.785
312.341	177.211
313.032	181.197
313.724	167.335
314.416	204.026
315.107	207.104
315.799	180.963
316.491	165.844
317.182	168.772
317.874	173.556
318.566	191.025
319.257	183.714
319.949	190.428
320.641	183.585
321.332	169.975
322.024	169.914
322.716	178.714
323.407	167.77
324.099	179.135
324.791	178.605
325.482	173.254
326.174	173.646
326.866	181
327.557	187.738
328.249	184.765
328.941	170.855
329.632	193.984
330.324	166.991
331.016	162.657
331.707	165.789
332.399	174.731
333.091	192.502
333.782	201.361
334.474	187.587
335.166	188.842
335.857	171.833
336.549	182.856
337.241	189.196
337.932	182.03
338.624	176.611
339.316	181.579
340.007	184.552
340.699	166.144
341.391	164.439
342.082	164.198
342.774	169.817
343.466	175.406
344.157	172.317
344.849	162.358
345.541	159.754
346.232	177.301
346.924	168.355
347.616	168.917
348.307	171.899
348.999	187.279
349.691	192.751
350.382	163.536
351.074	175.711
351.766	186.261
352.457	192.363
353.149	181.358
353.841	190.335
354.532	185.182
355.224	162.221
355.916	160.433
356.607	183.498
357.299	192.668
357.991	192.633
358.682	190.703
359.374	177.891
360.066	172.217
360.757	176.029
361.449	179.652
362.14	179.516
362.832	155.078
363.524	171.814
364.216	167.88
364.907	183.414
365.599	184.362
366.291	182.433
366.982	189.566
367.674	184.829
368.365	179.244
369.057	183.647
369.749	175.55
370.44	169.717
371.132	172.907
371.824	178.125
372.515	183.688
373.207	191.123
373.899	191.074
374.59	186.662
375.282	166.73
375.974	168.782
376.665	179.615
377.357	183.474
378.049	177.699
378.74	168.537
379.432	163.559
380.124	171.102
380.815	150.81
381.507	166.701
382.199	166.876
382.89	171.846
383.582	172.01
384.274	161.476
384.965	154.551
385.657	163.327
386.349	178.356
387.04	183.303
387.732	191.225
388.424	176.946
389.115	169.363
389.807	170.186
390.499	168.416
391.19	164.883
391.882	157.231
392.574	189.975
393.265	172.924
393.957	169.714
394.649	171.799
395.34	169.884
396.032	167.835
396.724	173.713
397.415	184.567
398.107	184.684
398.799	188.606
399.49	179.888
400.182	161.174
400.874	147.559
401.565	152.54
402.257	170.814
402.949	178.45
403.64	164.11
404.332	199.534
405.024	164.512
405.715	172.365
406.407	158.56
407.099	166.21
407.79	178.266
408.482	174.261
409.174	172.732
409.865	179.481
410.557	165.28
411.249	173.702
411.94	165.147
412.632	156.834
413.324	157.736
414.015	166.295
414.707	170.304
415.399	161.227
416.09	154
416.782	154
417.474	160.526
418.165	152.128
418.857	155.121
419.549	159.096
420.24	160.166
420.932	161.613
421.624	159.586
422.315	145.774
423.007	147.938
423.699	169.224
424.39	167.293
425.082	174.849
425.774	180.302
426.465	173.803
427.157	165.641
427.849	167.392
428.54	165.61
429.232	171.457
429.924	170.198
430.615	170
431.307	159.224
431.999	161.216
432.69	161.637
433.382	165.152
434.074	181.431
434.765	157.842
435.457	156.554
436.149	146.739
436.84	149.832
437.532	162.206
438.224	166.431
438.915	160.71
439.607	158.87
440.298	163.45
440.99	154.476
441.682	147.539
442.373	146.647
443.065	153.07
443.757	165.464
444.448	165.209
445.14	172.32
445.832	175.912
446.523	161.073
447.215	152
447.907	152.1
448.598	153.501
449.29	151.382
449.982	155.145
450.673	168.978
451.365	165.881
452.057	159.983
452.748	160.798
453.44	156.913
454.132	167.35
454.823	165.535
455.515	154.286
456.207	148.697
456.898	159.934
457.59	161.164
458.282	146.349
458.973	132.24
459.665	136.026
460.357	154.194
461.048	162.682
461.74	164.474
462.432	150.987
463.123	168.254
463.815	173.079
464.507	167.709
465.198	162.516
465.89	155.455
466.582	149.273
467.273	162.067
467.965	148.312
468.657	164.051
469.348	165.918
470.04	153.256
470.732	155.255
471.423	165.016
472.115	168.006
472.807	164.872
473.498	163.104
474.19	158.276
474.882	170.832
475.573	171
476.265	155.76
476.957	157.702
477.648	164.625
478.34	162.786
479.032	166.608
479.723	173.041
480.415	155.063
481.107	175.49
481.798	162.006
482.49	157.223
483.182	155.364
483.873	152.332
484.565	149.622
485.257	152.962
485.948	160.191
486.64	163.736
487.332	161.783
488.023	155.949
488.715	161.349
489.407	155.895
490.098	151.614
490.79	158.815
491.482	160.183
492.173	160.32
492.865	154.459
493.557	142.75
494.248	149.979
494.94	142.401
495.632	147.807
496.323	151.969
497.015	156.752
497.707	143.898
498.398	146.74
499.09	154
499.782	147.983
500.473	140.38
501.165	147.465
501.857	152.708
502.548	165.336
503.24	171.767
503.932	154.788
504.623	162.423
505.315	153.185
506.007	149.223
506.698	158.126
507.39	161.399
508.082	158.895
508.773	154.507
509.465	154.024
510.157	156.342
510.848	150.395
511.54	142.209
512.232	141.708
512.923	140.364
513.615	142.74
514.307	148.186
514.998	147.044
515.69	147
516.382	137.68
517.073	139.883
517.765	135.719
518.456	141.515
519.148	135.588
519.84	136.376
520.531	132.869
521.223	133.363
521.915	145.29
522.607	137.956
523.298	127.119
523.99	146.981
524.681	134.819
525.373	137.171
526.065	120.748
526.756	139.332
527.448	149.79
528.14	144.008
528.831	141.852
529.523	140.57
530.215	140.761
530.906	157.312
531.598	147.343
532.29	144.868
532.981	144.906
533.673	140.559
534.365	141.813
535.056	147.316
535.748	144.793
536.44	132.734
537.131	129.203
537.823	145.945
538.515	151.43
539.206	139.227
539.898	130.84
540.59	130.666
541.281	138.134
541.973	132.229
542.665	138.083
543.356	147.221
544.048	139.708
544.74	134.786
545.431	132.51
546.123	136.799
546.815	156.395
547.506	140.46
548.198	131.777
548.89	132.023
549.581	128.328
550.273	128.242
550.965	137.388
551.656	148.196
552.348	148.522
553.04	133.209
553.731	134.39
554.423	130.747
555.115	134.401
555.806	124.14
556.498	130.616
557.19	137.392
557.881	136.456
558.573	127.944
559.265	120.373
559.956	125.884
560.648	137.316
561.34	134.153
562.031	142.36
562.723	135.84
563.415	129.846
564.106	129.994
564.798	129.316
565.49	130.412
566.181	126.605
566.873	118.913
567.565	124.305
568.256	141.77
568.948	133.698
569.64	130.833
570.331	119.876
571.023	134.126
571.715	126.46
572.406	126.996
573.098	141.5
573.79	136.476
574.481	123.452
575.173	129.879
575.865	135.945
576.556	125.19
577.248	122.466
577.94	149.896
578.631	125.976
579.323	139.131
580.015	134.034
580.706	135.019
581.398	132.61
582.09	130.632
582.781	135.122
583.473	138.102
584.165	138.182
584.856	141.162
585.548	131.111
586.24	121.437
586.931	121.496
587.623	121.567
588.315	132.864
589.006	136.322
589.698	137.185
590.39	140.845
591.081	138.362
591.773	127.838
592.464	123.86
593.156	124.826
593.848	123.78
594.539	128.761
595.231	145.207
595.923	140.458
596.615	128.656
597.306	128.591
597.998	126.423
598.689	126.714
599.381	134.22
600.073	131.151
600.764	117.855
601.456	133.038
602.148	129.692
602.839	131.926
603.531	145.818
604.223	126.937
604.914	138.687
605.606	132.47
606.298	125.003
606.989	130.839
607.681	130.107
608.373	123.821
609.064	134.858
609.756	137.797
610.448	138.28
611.139	130.005
611.831	140.64
612.523	136.525
613.214	137.088
613.906	139.223
614.598	142.144
615.289	147.965
615.981	145.618
616.673	132.645
617.364	129.838
618.056	142.612
618.748	134.119
619.439	127.581
620.131	119.285
620.823	120.778
621.514	115.323
622.206	110.017
622.898	121.658
623.589	127.414
624.281	121.579
624.973	121.617
625.664	119.312
626.356	109.117
627.048	127.097
627.739	114.945
628.431	118.052
629.123	119.499
629.814	125.717
630.506	120.955
631.198	114.491
631.889	120.353
632.581	126.854
633.273	125.597
633.964	128.432
634.656	130.885
635.348	120.418
636.039	124.798
636.731	136.787
637.423	122.944
638.114	121.62
638.806	119.791
639.498	114.691
640.189	119.779
640.881	113.117
641.573	113.512
642.264	128.543
642.956	133.641
643.648	124.757
644.339	121.417
645.031	117.501
645.723	115.988
646.414	130.741
647.106	127.038
647.798	125.167
648.489	132.219
649.181	118.188
649.873	135.42
650.564	127.946
651.256	118.115
651.948	115.718
652.639	115.552
653.331	119.858
654.023	120.589
654.714	124.376
655.406	126.465
656.098	114.686
656.789	131.904
657.481	119.19
658.173	108.089
658.864	105.253
659.556	102.3
660.248	106.17
660.939	109.797
661.631	113.022
662.323	116.567
663.014	117.834
663.706	120.322
664.398	119.219
665.089	117.257
665.781	114.969
666.473	126.518
667.164	120.384
667.856	124.844
668.547	117.754
669.239	117.716
669.931	113.525
670.622	107.613
671.314	105.567
672.006	110.122
672.698	114.371
673.389	112.89
674.081	121.16
674.772	109.427
675.464	114.095
676.156	142.007
676.847	112.872
677.539	117.225
678.231	118.902
678.922	111.245
679.614	114.091
680.306	128.362
680.997	122.788
681.689	109.245
682.381	106.454
683.072	107.375
683.764	119.255
684.456	110.17
685.147	120.282
685.839	107.716
686.531	113.308
687.222	108.228
687.914	114.5
688.606	108.875
689.297	111.383
689.989	115.079
690.681	111.88
691.372	112.955
692.064	118.591
692.756	118.429
693.447	115.279
694.139	114.441
694.831	111.349
695.522	98.4458
696.214	113.014
696.906	113.544
697.597	117.14
698.289	109.286
698.981	108.329
699.672	104.687
700.364	104.623
701.056	102.166
701.747	109.103
702.439	108.696
703.131	103.461
703.822	116.483
704.514	110.994
705.206	92.26
705.897	99.95
706.589	99.4861
707.281	98.0189
707.972	108.68
708.664	110.427
709.356	106.585
710.047	108.084
710.739	106.7
711.431	114.063
712.122	125.778
712.814	117.357
713.506	111.923
714.197	117.758
714.889	103.107
715.581	100.485
716.272	103.64
716.964	105.89
717.656	121.528
718.347	111.21
719.039	102.331
719.731	111.855
720.422	107.998
721.114	101.012
721.806	111.108
722.497	110.887
723.189	110.063
723.881	105.232
724.572	91.5756
725.264	87.9719
725.956	96.7923
726.647	100.058
727.339	104.157
728.031	115.995
728.722	117.926
729.414	102.552
730.106	99.7322
730.797	120.805
731.489	116.142
732.181	100.795
732.872	109.971
733.564	112.981
734.256	116.522
734.947	118.187
735.639	108.596
736.331	105.713
737.022	115.421
737.714	120.681
738.406	121.143
739.097	94.6202
739.789	100.51
740.481	107.652
741.172	108.99
741.864	99.1661
742.556	102.994
743.247	87.8447
743.939	86.1062
744.63	102.551
745.322	100.2
746.014	99.7494
746.706	103.108
747.397	103.567
748.089	104.848
748.781	100.433
749.472	94.0762
750.164	102.743
750.855	101.312
751.547	99.1426
752.239	102.164
752.93	98.2532
753.622	105.811
754.314	111.52
755.005	101.622
755.697	106.93
756.389	96.5068
757.08	99.5487
757.772	99.6301
758.464	113.616
759.155	114.141
759.847	104.314
760.539	99.7533
761.23	89.4016
761.922	91.3982
762.614	109.804
763.305	95.5288
763.997	97.0244
764.689	95.6154
765.38	110.699
766.072	113.539
766.764	104.204
767.455	116.313
768.147	116.34
768.839	109.455
769.53	103.951
770.222	101.897
770.914	96.0071
771.605	96.7641
772.297	106.653
772.989	108.405
773.68	101.602
774.372	102.914
775.064	111.115
775.755	112.138
776.447	100.256
777.139	99.5241
777.83	102.513
778.522	101.297
779.214	86.1353
779.905	104.808
780.597	104.221
781.289	104.475
781.98	97.0332
782.672	96.4736
783.364	102.489
784.055	103.729
784.747	94.5534
785.439	89.637
786.13	94.4452
786.822	90.3083
787.514	87.6455
788.205	103.58
788.897	105.7
789.589	97.4126
790.28	101.176
790.972	98.1721
791.664	102.436
792.355	106.166
793.047	85.2451
793.739	111.849
794.43	98.8054
795.122	97.4777
795.814	95.9799
796.505	94.8221
797.197	94.5672
797.889	89.6553
798.58	88.6642
799.272	96.1832
799.964	106.86
800.655	102.519
801.347	95.7521
802.039	98.8482
802.73	95.7442
803.422	106.954
804.114	114.123
804.805	108.578
805.497	105.541
806.189	102.381
806.88	96.7941
807.572	98.4302
808.264	90.7038
808.955	101.393
809.647	88.407
810.339	95.0394
811.03	104.405
811.722	114.718
812.414	107.763
813.105	91.1073
813.797	88.2459
814.489	91.6225
815.18	101.455
815.872	109.216
816.564	102.972
817.255	100.194
817.947	98.649
818.638	98.6462
819.33	100.109
820.022	92.6092
820.713	100.176
821.405	96.2242
822.097	97.5249
822.789	83.9179
823.48	101.474
824.172	91.3433
824.863	101.002
825.555	95.1242
826.247	98.9861
826.938	91.071
827.63	88.0637
828.322	93.2401
829.013	100.788
829.705	95.6054
830.397	96.3236
831.088	98.641
831.78	90.4779
832.472	90.8852
833.163	90.3899
833.855	87.7076
834.547	85.3586
835.238	85.0301
835.93	90.9072
836.622	94.5717
837.313	92.7877
838.005	92.4595
838.697	86.2686
839.388	78.125
840.08	71.9686
840.772	83.0091
841.463	96.6821
842.155	87.3151
842.847	92.0553
843.538	94.2176
844.23	86.9773
844.922	86.3201
845.613	88.9794
846.305	97.5237
846.997	101.023
847.688	88.9423
848.38	94.3331
849.072	85.9378
849.763	82.7978
850.455	92.7625
851.147	99.5589
851.838	91.3924
852.53	92.229
853.222	95.7425
853.913	90.8372
854.605	96.8093
855.297	107.005
855.988	113.864
856.68	116.158
857.372	107.132
858.063	102.096
858.755	108.684
859.447	101.511
860.138	92.3929
860.83	110.327
861.522	105.819
862.213	102.441
862.905	91.2121
863.597	93.3132
864.288	90.4279
864.98	92.2513
865.672	94.5175
866.363	85.2569
867.055	84.6066
867.747	91.867
868.438	96.4542
869.13	94.6949
869.822	83.0754
870.513	81.5569
871.205	91.3827
871.897	86.9498
872.588	84.4153
873.28	87.4563
873.972	88.361
874.663	80.5761
875.355	99.5762
876.047	90.7574
876.738	92.6768
877.43	82.7821
878.122	90.6463
878.813	84.9569
879.505	87.793
880.197	102.036
880.888	91.3682
881.58	90.6702
882.272	90.9498
882.963	104.779
883.655	99.5727
884.347	85.2288
885.038	84.5049
885.73	80.4033
886.422	78.7969
887.113	91.1598
887.805	95.038
888.497	89.377
889.188	83.8135
889.88	79.2156
890.572	97.3444
891.263	86.1354
891.955	83.7234
892.647	88.029
893.338	81.327
894.03	91.5887
894.721	81.9509
895.413	71.6093
896.105	85.5171
896.797	75.6705
897.488	78.1739
898.18	89.1817
898.872	103.391
899.563	83.7038
900.255	86.5993
900.946	98.488
901.638	104.953
902.33	101.456
903.021	107.129
903.713	73.3989
904.405	60.7834
905.096	86.6204
905.788	81.5202
906.48	79.0402
907.171	85.2276
907.863	93.2021
908.555	92.2769
909.246	91.7225
909.938	85.0227
910.63	75.0958
911.321	81.0132
912.013	104.348
912.705	84.9149
913.396	87.0316
914.088	87.8297
914.78	96.5334
915.471	80.9423
916.163	85.2333
916.855	86.6228
917.546	76.8086
918.238	93.736
918.93	78.4345
919.621	90.0697
920.313	81.3749
921.005	84.6697
921.696	80.8869
922.388	81.1061
923.08	79.0117
923.771	71.4015
924.463	78.5991
925.155	82.0147
925.846	79.1541
926.538	82.4193
927.23	89.3127
927.921	96.2377
928.613	85.7648
929.305	75.3047
929.996	74.4862
930.688	83.1894
931.38	77.1538
932.071	84.488
932.763	94.5789
933.455	91.6956
934.146	80.2396
934.838	91.6631
935.53	78.8544
936.221	80.8783
936.913	74.8057
937.605	69.9336
938.296	88.6458
938.988	79.8226
939.68	65.5986
940.371	75.8304
941.063	59.7465
941.755	66.0391
942.446	81.9195
943.138	71.8256
943.83	75.4247
944.521	77.6379
945.213	84.675
945.905	80.6004
946.596	83.0882
947.288	85.5644
947.98	81.0176
948.671	79.9141
949.363	73.1295
950.055	76.6338
950.746	85.9367
951.438	84.045
952.13	82.1737
952.821	74.2662
953.513	76.403
954.205	77.9116
954.896	88.9122
955.588	81.0367
956.28	81.957
956.971	87.605
957.663	72.8787
958.355	78
959.046	77.3395
959.738	73.3996
960.43	77.4865
961.121	85.3949
961.813	80.1167
962.505	90.8809
963.196	78.1898
963.888	72.9515
964.58	85.8613
965.271	68.4744
965.963	90.7784
966.655	76.4259
967.346	87.2268
968.038	70.8924
968.73	67.5411
969.421	85.7229
970.113	78.8051
970.804	69.6505
971.496	79.0281
972.188	87.3337
972.88	87.5113
973.571	88.6568
974.263	81.7418
974.954	87.4312
975.646	93.7466
976.338	79.6498
977.029	75.6197
977.721	84.9189
978.413	91.2752
979.104	89.7605
979.796	84.3296
980.488	83.1646
981.179	76.4856
981.871	72.5042
982.563	79.5187
983.254	81.877
983.946	76.4682
984.638	73.5219
985.329	73.2074
986.021	76.6558
986.713	83.0895
987.404	76.0678
988.096	72.7443
988.788	76.8809
989.479	92.7373
990.171	77.3872
990.863	79.0129
991.554	73.565
992.246	72.9022
992.938	81.834
993.629	70.1392
994.321	92.8483
995.013	87.7339
995.704	86.7524
996.396	83.0986
997.088	85.6223
997.779	93.4932
998.471	72.8226
999.163	98.0898
999.854	89.2655
1000.55	93.1725
1001.24	79.5462
1001.93	77.6206
1002.62	88.3631
1003.31	78.9528
1004	82.8444
1004.7	88.0073
1005.39	91.2508
1006.08	91.0787
1006.77	89.3083
1007.46	86.6386
1008.15	84.5485
1008.85	83.1594
1009.54	78.8197
1010.23	83.932
1010.92	78.4993
1011.61	83.0764
1012.3	72.7106
1013	74.1412
1013.69	79.804
1014.38	74.1462
1015.07	81.5965
1015.76	75.344
1016.45	62.882
1017.15	71.3526
1017.84	81.2586
1018.53	84.3246
1019.22	81.8662
1019.91	77.0213
1020.6	73.2224
1021.3	72.5913
1021.99	74.8774
1022.68	72.7602
1023.37	77.9437
1024.06	83.329
1024.75	83.5637
1025.45	85.6266
1026.14	79.3762
1026.83	84.0844
1027.52	91.7443
1028.21	89.7925
1028.9	82.6818
1029.6	77.4445
1030.29	77.772
1030.98	75.2651
1031.67	79.6371
1032.36	88.5296
1033.05	85.2216
1033.75	78.2092
1034.44	73.9149
1035.13	74.7332
1035.82	97.625
1036.51	87.2596
1037.2	73.3979
1037.9	91.2418
1038.59	92.3351
1039.28	86.7723
1039.97	84.4971
1040.66	81.6582
1041.35	77.9042
1042.05	80.1685
1042.74	82.9993
1043.43	87.9531
1044.12	92.5154
1044.81	85.3635
1045.5	69.8931
1046.2	79.6762
1046.89	66.0496
1047.58	76.6136
1048.27	74.0559
1048.96	88.5687
1049.65	74.5519
1050.35	86.4172
1051.04	80.3689
1051.73	57.4534
1052.42	78.3658
1053.11	68.9208
1053.8	70.5128
1054.5	57.352
1055.19	65.0112
1055.88	61.3008
1056.57	77.5996
1057.26	80.6246
1057.95	76.5996
1058.65	69.9312
1059.34	71.5815
1060.03	60.6774
1060.72	82.4847
1061.41	73.2767
1062.1	65.1008
1062.8	62.9565
1063.49	75.3338
1064.18	74.512
1064.87	82.094
1065.56	73.4865
1066.25	75.6144
1066.95	71.1571
1067.64	73.9125
1068.33	77.3674
1069.02	72.5086
1069.71	72.3601
1070.4	71.9691
1071.1	77.1394
1071.79	64.933
1072.48	63.2295
1073.17	72.9156
1073.86	69.8968
1074.55	61.7984
1075.25	74.155
1075.94	73.5943
1076.63	66.7435
1077.32	67.2167
1078.01	64.3201
1078.7	67.9424
1079.4	68.2831
1080.09	73.7535
1080.78	74.5499
1081.47	71.8302
1082.16	76.7679
1082.85	68.2226
1083.55	57.3631
1084.24	62.6108
1084.93	60.2227
1085.62	70.6321
1086.31	71.4823
1087	71.1631
1087.7	81.1314
1088.39	79.8668
1089.08	70.6805
1089.77	77.7962
1090.46	63.676
1091.15	71.489
1091.85	72.189
1092.54	78.1857
1093.23	75.5915
1093.92	68.076
1094.61	75.8531
1095.3	61.6793
1096	68.8008
1096.69	75.5251
1097.38	73.8072
1098.07	63.8108
1098.76	68.3081
1099.45	73.1615
1100.15	75.165
1100.84	83.75
1101.53	69.8925
1102.22	72.2938
1102.91	63.1091
1103.6	69.4892
1104.3	61.0306
1104.99	66.8338
1105.68	77.5212
1106.37	71.2729
1107.06	67.0842
1107.75	75.7152
1108.45	81.0171
1109.14	88.3889
1109.83	86.4891
1110.52	89.2735
1111.21	87.1979
1111.9	71.5349
1112.6	72.978
1113.29	79.3545
1113.98	82.4627
1114.67	78.4037
1115.36	79.114
1116.05	89.8157
1116.75	84.9511
1117.44	83.5274
1118.13	74.4939
1118.82	67.8351
1119.51	76.5188
1120.2	71.5703
1120.9	57.0249
1121.59	68.6399
1122.28	62.1738
1122.97	75.663
1123.66	72.9764
1124.35	64.4335
1125.05	71.4194
1125.74	62.8226
1126.43	55.6554
1127.12	74.5378
1127.81	73.6304
1128.5	82.611
1129.2	66.1654
1129.89	63.0839
1130.58	73.5014
1131.27	65.9619
1131.96	74.7602
1132.65	86.9669
1133.35	71.3828
1134.04	69.762
1134.73	73.5022
1135.42	57.8836
1136.11	77.7709
1136.8	66.4682
1137.5	53.3733
1138.19	67.4444
1138.88	57.8533
1139.57	65.9808
1140.26	78.8628
1140.95	57.131
1141.65	65.7983
1142.34	67.9231
1143.03	66.7917
1143.72	88.0648
1144.41	53.742
1145.1	65.1446
1145.8	66.6722
1146.49	63.2752
1147.18	67.335
1147.87	76.6334
1148.56	57.8771
1149.25	58.7439
1149.95	70.3962
1150.64	71.6993
1151.33	67.2899
1152.02	73.9669
1152.71	76.2696
1153.4	78.9947
1154.1	69.6912
1154.79	74.4355
1155.48	64.2987
1156.17	46.7108
1156.86	48.0264
1157.55	71.8135
1158.25	71.1499
1158.94	66.2641
1159.63	66.6093
1160.32	78.791
1161.01	70.3301
1161.7	70.3789
1162.4	69.9881
1163.09	58.3738
1163.78	65.0935
1164.47	70.841
1165.16	60.0313
1165.85	57.7065
1166.55	60.7961
1167.24	62.334
1167.93	67.5894
1168.62	70.7203
1169.31	67.8832
1170	66.1636
1170.7	64.9985
1171.39	62.0049
1172.08	65.3025
1172.77	65.171
1173.46	64.7443
1174.15	67.7634
1174.85	74.2372
1175.54	69.8503
1176.23	61.3517
1176.92	56.333
1177.61	63.8747
1178.3	66.4229
1179	74.5168
1179.69	66.0927
1180.38	62.4927
1181.07	72.6907
1181.76	74.1799
1182.45	71.3461
1183.15	64.2099
1183.84	67.1288
1184.53	59.4924
1185.22	67.3297
1185.91	61.8817
1186.6	68.9058
1187.3	62.6033
1187.99	65.761
1188.68	59.0447
1189.37	77.5561
1190.06	78.7409
1190.75	71.574
1191.45	59.621
1192.14	56.572
1192.83	66.3617
1193.52	58.3608
1194.21	61.5622
1194.9	59.6741
1195.6	71.2968
1196.29	70.6066
1196.98	59.7308
1197.67	66.8528
1198.36	79.3375
1199.05	81.523
1199.75	71.2075
1200.44	68.8753
1201.13	65.8933
1201.82	65.2382
1202.51	65.7252
1203.2	66.8414
1203.9	72.9301
1204.59	67.3566
1205.28	64.7622
1205.97	66.3197
1206.66	66.3976
1207.35	67.25
1208.05	73.9862
1208.74	64.5474
1209.43	58.4241
1210.12	70.4254
1210.81	62.859
1211.5	56.1787
1212.2	54.3635
1212.89	55.5539
1213.58	48.9916
1214.27	68.3024
1214.96	63.2158
1215.65	68.8172
1216.35	59.7601
1217.04	59.4225
1217.73	62.5379
1218.42	72.5761
1219.11	68.6337
1219.8	58.5709
1220.5	53.0274
1221.19	78.1445
1221.88	63.1163
1222.57	61.0236
1223.26	76.061
1223.95	54.8652
1224.64	54.6536
1225.34	68.7359
1226.03	52.5916
1226.72	47.0987
1227.41	55.554
1228.1	64.3261
1228.8	69.743
1229.49	71.4518
1230.18	68.7995
1230.87	63.7133
1231.56	56.5288
1232.25	60.367
1232.95	71.0455
1233.64	68.48
1234.33	68.8979
1235.02	61.8568
1235.71	66.5476
1236.4	70.4432
1237.1	68.7111
1237.79	61.3111
1238.48	48.5647
1239.17	57.1934
1239.86	65.7947
1240.55	63.1833
1241.24	67.6725
1241.94	53.5935
1242.63	56.1291
1243.32	61.924
1244.01	60.1747
1244.7	64.1741
1245.39	66.8096
1246.09	78.089
1246.78	68.2798
1247.47	62.9643
1248.16	54.5351
1248.85	69.1829
1249.54	62.0405
1250.24	71.094
1250.93	65.7107
1251.62	69.1487
1252.31	62.7287
1253	68.1957
1253.69	64.9102
1254.39	64.3695
1255.08	63.1442
1255.77	61.6543
1256.46	71.667
1257.15	58.4712
1257.85	53.4703
1258.54	62.8675
1259.23	66.8068
1259.92	58.7291
1260.61	58.4507
1261.3	67.8718
1261.99	70.2516
1262.69	60.9687
1263.38	55.3589
1264.07	64.8255
1264.76	70.1777
1265.45	71.5711
1266.14	70.8842
1266.84	64.7108
1267.53	72.3548
1268.22	60.4931
1268.91	64.9792
1269.6	76.9761
1270.29	53.6096
1270.99	74.4623
1271.68	55.7822
1272.37	69
1273.06	67.5215
1273.75	65.3222
1274.44	69.3615
1275.14	55.3805
1275.83	64.1214
1276.52	63.5798
1277.21	63.1084
1277.9	57.5846
1278.59	66.3591
1279.29	62.9253
1279.98	60.4971
1280.67	62.6703
1281.36	67.8997
1282.05	65.653
1282.74	56.0475
1283.44	53.6778
1284.13	69.4178
1284.82	63.1119
1285.51	61.6
1286.2	72.6856
1286.89	67.2455
1287.59	65.7759
1288.28	66.8909
1288.97	51.2212
1289.66	56.7474
1290.35	64.3644
1291.04	59.6254
1291.74	62.1153
1292.43	72.1353
1293.12	60.4282
1293.81	57.7305
1294.5	66.138
1295.19	62.8577
1295.89	66.9557
1296.58	62.4728
1297.27	66.074
1297.96	68.4474
1298.65	61.4834
1299.34	61.2658
1300.04	60.5503
1300.73	60.9573
1301.42	69.2829
1302.11	48.8967
1302.8	66.1984
1303.49	58.6988
1304.19	58.6006
1304.88	65.705
1305.57	50.7452
1306.26	51.7552
1306.95	52.5847
1307.64	59.6283
1308.34	61.6073
1309.03	51.6899
1309.72	60.5164
1310.41	64.7051
1311.1	62.3163
1311.79	58.5233
1312.49	56.4765
1313.18	57.5384
1313.87	56.1635
1314.56	57.2669
1315.25	59.9573
1315.94	66.4154
1316.64	59.8152
1317.33	58.3789
1318.02	63.599
1318.71	59.0393
1319.4	55.1666
1320.09	55.6477
1320.79	61.4327
1321.48	67.9544
1322.17	69.2435
1322.86	50.8338
1323.55	61.8551
1324.24	55.0349
1324.94	60
1325.63	62.8389
1326.32	65.8685
1327.01	53.488
1327.7	57.5606
1328.39	61.4886
1329.09	57.3247
1329.78	56
1330.47	61.2781
1331.16	62.1424
1331.85	50.7657
1332.54	55.7224
1333.24	55.1304
1333.93	60.3568
1334.62	59.1375
1335.31	58.9786
1336	59
1336.69	52.679
1337.39	47.7715
1338.08	63.8927
1338.77	63.3104
1339.46	63.162
1340.15	56.9443
1340.84	53.7303
1341.54	45.6906
1342.23	57.143
1342.92	53.3792
1343.61	47.8729
1344.3	53.8972
1344.99	59
1345.69	63.5177
1346.38	54.879
1347.07	50.5546
1347.76	52.5373
1348.45	50.4637
1349.14	40.1518
1349.84	50.3563
1350.53	52.9926
1351.22	42.7156
1351.91	57.1727
1352.6	56.0917
1353.29	42.2063
1353.99	46.4963
1354.68	47.7348
1355.37	53.289
1356.06	49.9654
1356.75	52.0459
1357.44	56.8484
1358.14	47.4402
1358.83	53.3039
1359.52	58.9972
1360.21	58.7206
1360.9	55.1314
1361.59	50.6961
1362.29	55.2748
1362.98	45.7406
1363.67	49.9312
1364.36	55.7965
1365.05	49.7248
1365.74	42.2377
1366.44	53.5823
1367.13	44.7562
1367.82	53.2776
1368.51	48.8329
1369.2	52.9386
1369.89	57.8891
1370.59	52.6204
1371.28	34.3567
1371.97	37.9325
1372.66	53.0418
1373.35	53.2006
1374.04	56.8148
1374.74	51.9928
1375.43	47.3444
1376.12	49.9094
1376.81	58.6991
1377.5	56.5897
1378.19	50.7189
1378.89	44.8885
1379.58	48.7143
1380.27	42.1449
1380.96	55.7967
1381.65	51.9161
1382.34	55.5192
1383.04	45.2929
1383.73	43.3138
1384.42	58.7913
1385.11	55.986
1385.8	58.9092
1386.49	56.6612
1387.19	63.0391
1387.88	42.3124
1388.57	47.7387
1389.26	43.2807
1389.95	51.8926
1390.64	54.3708
1391.34	58.141
1392.03	52.1847
1392.72	52.6796
1393.41	41.3427
1394.1	39.8272
1394.79	44.6162
1395.49	48
1396.18	50.4489
1396.87	51.0304
1397.56	51.519
1398.25	45.8988
1398.94	46.7068
1399.64	60.2623
1400.33	47.5381
1401.02	49.7565
1401.71	46.7058
1402.4	40.6456
1403.09	51.7472
1403.79	51.0023
1404.48	55.2918
1405.17	56.4685
1405.86	49.0332
1406.55	48.1421
1407.24	49.9005
1407.94	42.2469
1408.63	53.0404
1409.32	52.9412
1410.01	48.0895
1410.7	53.5976
1411.39	56.0531
1412.09	54.2809
1412.78	59.4252
1413.47	49.2502
1414.16	47.3978
1414.85	52.6393
1415.54	52.4041
1416.24	54.2681
1416.93	51.4299
1417.62	53.8091
1418.31	49.7617
1419	57.5882
1419.69	56.4624
1420.39	62.7478
1421.08	58.4414
1421.77	57.3869
1422.46	47.1891
1423.15	51.8996
1423.84	53.0126
1424.54	57.3574
1425.23	52.3346
1425.92	53.4881
1426.61	54.244
1427.3	51.8722
1427.99	58.7116
1428.69	56.8577
1429.38	53.2878
1430.07	55.1299
1430.76	50.1903
1431.45	49.5096
1432.14	58.0141
1432.84	49.0417
1433.53	58.7534
1434.22	55.9553
1434.91	50.2984
1435.6	47.9942
1436.29	45.0904
1436.99	50.6044
1437.68	52.1177
1438.37	51.4908
1439.06	57.4224
1439.75	58.3225
1440.44	58.3025
1441.14	63.0432
1441.83	57.9987
1442.52	55.3509
1443.21	58.8381
1443.9	57.8992
1444.59	59.8041
1445.29	54.9061
1445.98	67.488
1446.67	53.28
1447.36	56.444
1448.05	57.1681
1448.74	55.6161
1449.44	59.0901
1450.13	63.5256
1450.82	64.0321
1451.51	46.7108
1452.2	51.1313
1452.89	60.3603
1453.59	64.9828
1454.28	66.7701
1454.97	65.4327
1455.66	48.7668
1456.35	72.0031
1457.04	53.2489
1457.74	58.4981
1458.43	65.9944
1459.12	59.0397
1459.81	57.4286
1460.5	65.9845
1461.19	58.7127
1461.89	60.6472
1462.58	65.4563
1463.27	59.0917
1463.96	49.2479
1464.65	60.7033
1465.34	60.8182
1466.04	60.1663
1466.73	59.4402
1467.42	61.9407
1468.11	52.8359
1468.8	62.4504
1469.49	61.7904
1470.19	57.5047
1470.88	57.3847
1471.57	63.5625
1472.26	53.1967
1472.95	50.1644
1473.64	54.9583
1474.34	61.5216
1475.03	61.022
1475.72	66.3302
1476.41	45.2491
1477.1	37.2618
1477.79	40.6473
1478.49	62.6692
1479.18	59.6491
1479.87	54.3277
1480.56	61.0797
1481.25	60.6276
1481.94	56.5486
[truncated: 749 more rows]
