# Supplementary material for: Putative fossil blood cells reinterpreted as diagenetic structures
Source: PeerJ journal article supplement (doi:10.7717/peerj.12651), 2021-12-16
Supplement: SupplementalInformation_Korneisel.pdf [file SupplementalInformation_Korneisel.pdf]

| Specimen | Scan                      | Apatite Peak Position |
|----------|---------------------------|-----------------------|
| 2018-L1  | pos1_darkredfill          | 963.3                 |
| 2018-L1  | pos2_transorange2         | 963.3                 |
| 2018-L1  | pos3_transfill2           | 963.3                 |
| 2018-L1  | pos3_transfill3           | 963.3                 |
| 2018-L1  | pos4_bone                 | 961.5                 |
| 2018-L1  | pos4_emptyvessel          | 963.3                 |
| 2018-L1  | pos4_sphere1              | 959.8                 |
| 2018-L1  | pos4_sphere3              | 965                   |
| 2018-L1  | pos5_sphere5              | 963.3                 |
| 2018-L1  | pos6_darkredsphere        | 959.8                 |
| 2018-L1  | pos7_transareaWredspecks2 | 961.5                 |
| 2018-L1  | pos7_transareaWredspecks3 | 963.3                 |
| 2018-L1  | pos8_bone                 | 963.3                 |
| 2018-L2  | pos1_transredorange       | 961.5                 |
| 2018-L2  | pos2_bone                 | 961.5                 |
| 2018-L2  | pos2_fracture             | 961.5                 |
| 2018-L2  | pos2_indistinctredorange2 | 961.5                 |
| 2018-L2  | pos2_indistinctredorange3 | 963.3                 |
| 2018-L2  | pos2_redfill              | 965                   |
| 2018-L2  | pos2_round4               | 963.3                 |
| 2018-L2  | pos2_round5               | 961.5                 |
| 2018-L2  | pos5_NOorangestain        | 961.5                 |
| 2018-L2  | pos5_orangestain          | 961.5                 |
| 2018-L3  | pos1_round2               | 961.5                 |
| 2018-L3  | pos1_round3               | 963.3                 |
| 2018-L3  | pos2_sphere1              | 963.3                 |
| 2018-L4  | pos1_indistroundfill      | 961.5                 |
| 2018-L4  | pos1_roundfill2           | 961.5                 |
| 2018-L4  | pos2_roundfill            | 961.5                 |
| 2018-L4  | pos2_roundfill2           | 963.3                 |
| 2018-L4  | pos3_sphere               | 963.3                 |
| 2018-L4  | pos3_sphere3              | 961.5                 |
| 2018-L4  | pos3_sphere4              | 961.5                 |
| 2018-L4  | pos3_sphere5              | 963.3                 |

**Table 1.** Apatite peak positions across 34 individual scans of serial section 2018-L1 – 2018-L4.

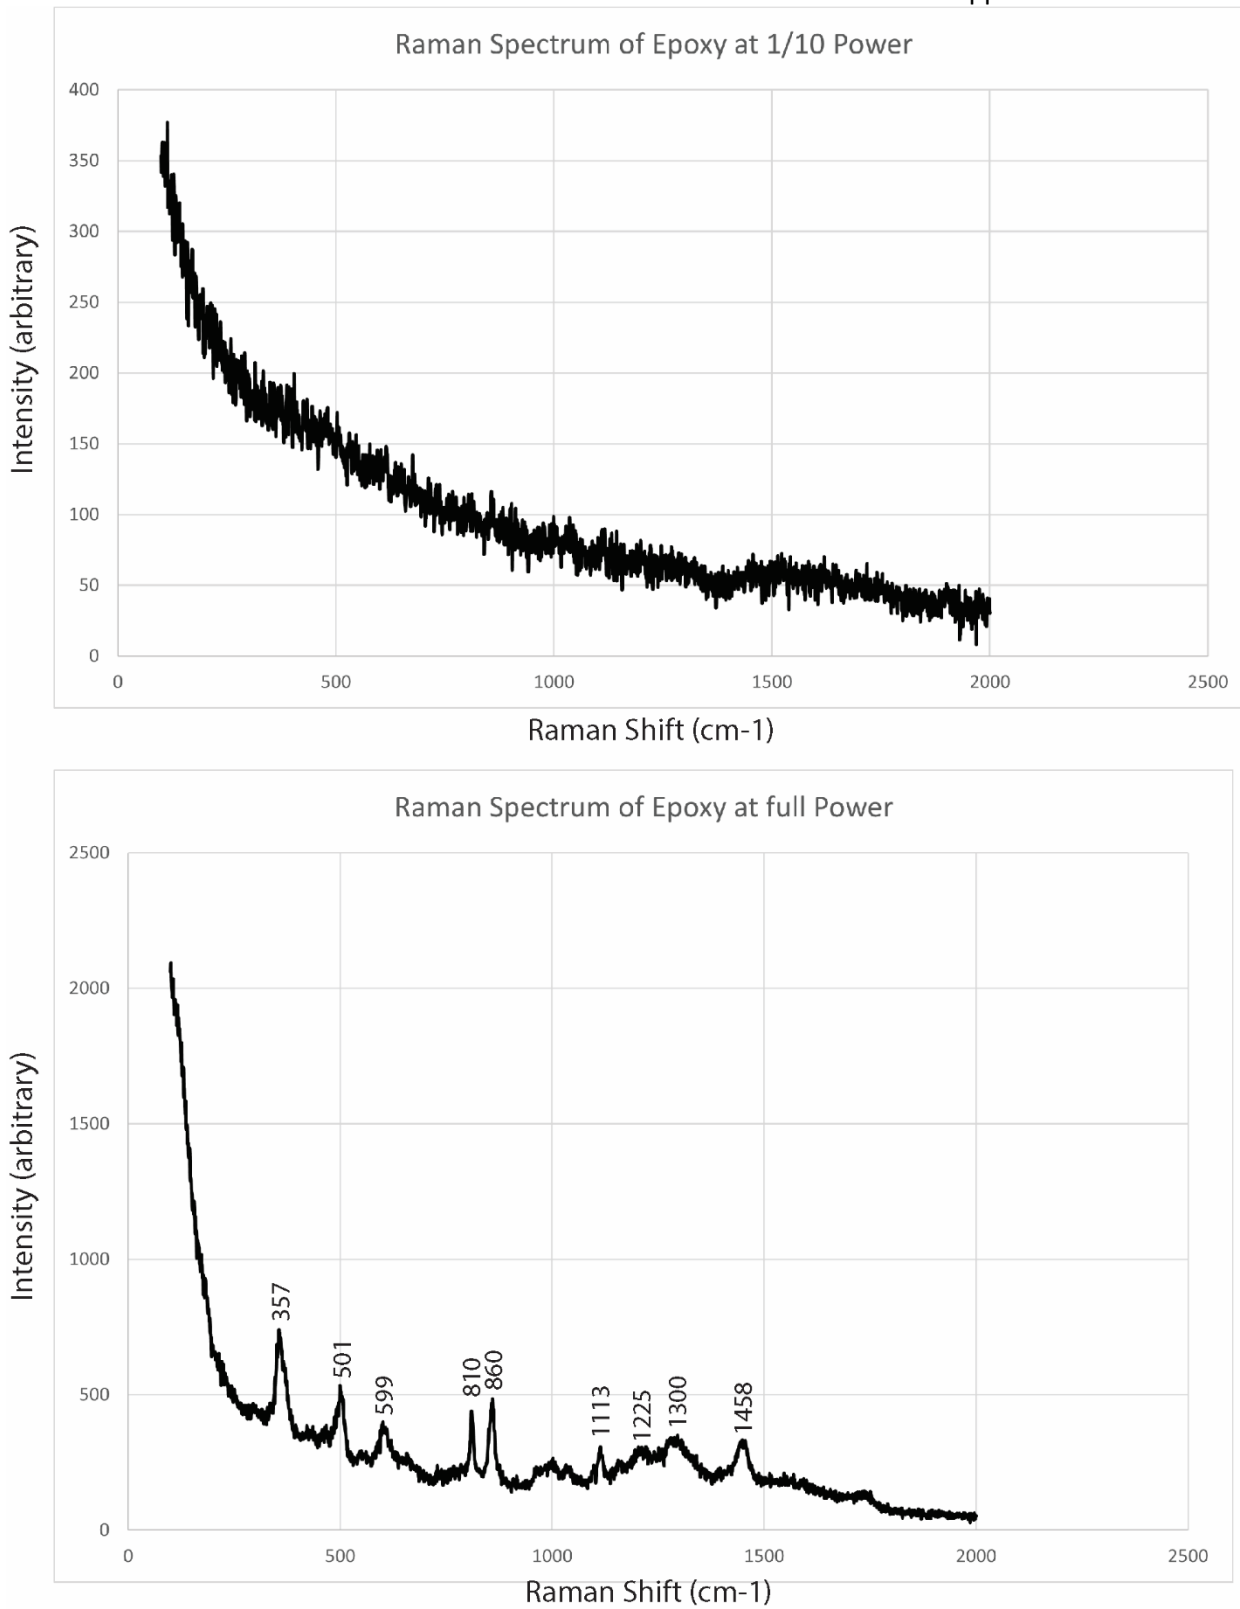

**Figure 1.** Raman spectra of epoxy used in this study affixed to plexiglass with superglue. These peaks are only distinguishable at a laser power not used on any of the samples in this study. They also do not line up with the sample peaks reported in the manuscript.

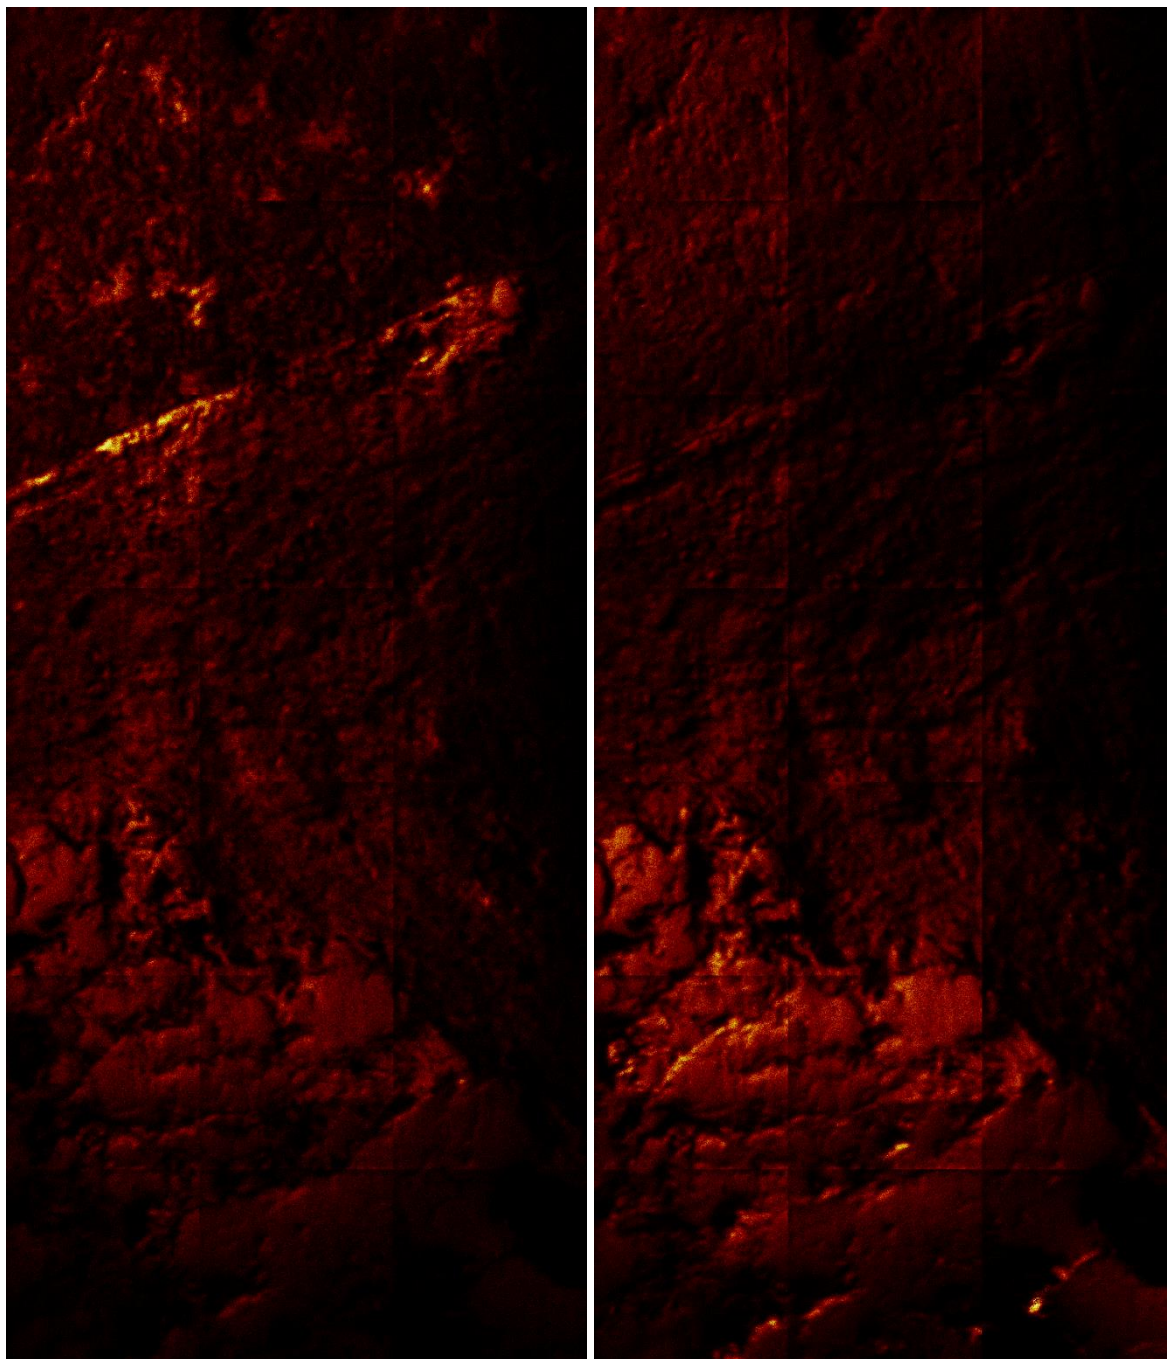

**Figure 2.** TOF-SIMS scans of FeO<sup>-</sup> (left) and Mg<sub>2</sub>O<sup>-</sup> (right) over the same sample area described in Figure 6. See Figure 6 caption for context.
